# Supplementary material for: Vertical organization of microbial communities in Salineta hypersaline wetland, Spain
Source: Frontiers journal article supplement (doi:10.3389/fmicb.2023.869907), 2023-01-27
Supplement: Table_3.xls [file Table_3.xls]

## Sheet: Sheet1
Table S3. Functional profile inferred from 16S rRNA gene sequences from the different layers (L1, L2, L3 or L1, L2) of each station (S1, S2, S3)
function	description	W.S1.L1.R1	W.S1.L1.R2	W.S1.L1.R3	W.S1.L2.R1	W.S1.L2.R2	W.S1.L2.R3	W.S1.L3.R1	W.S1.L3.R2	W.S1.L3.R3	W.S2.L1.R1	W.S2.L1.R2	W.S2.L1.R3	W.S2.L2.R1	W.S2.L2.R2	W.S2.L2.R3	W.S3.L1.R1	W.S3.L1.R2	W.S3.L1.R3	W.S3.L2.R1	W.S3.L2.R2	W.S3.L2.R3	S.S1.L1.R1	S.S1.L1.R2	S.S1.L1.R3	S.S1.L2.R1	S.S1.L2.R2	S.S1.L2.R3	S.S1.L3.R1	S.S1.L3.R2	S.S1.L3.R3	S.S2.L1.R1	S.S2.L1.R2	S.S2.L1.R3	S.S2.L2.R1	S.S2.L2.R2	S.S2.L2.R3	S.S3.L1.R1	S.S3.L1.R2	S.S3.L1.R3	S.S3.L2.R1	S.S3.L2.R2	S.S3.L2.R3
K00001	E1.1.1.1, adh; alcohol dehydrogenase [EC:1.1.1.1]	11349.4	10557.8	11508.6	11105.8	8498.47	19772.9	16237.8	13934.9	11861.3	13927.5	11931.5	13381.8	11624.6	13778.5	16170	12707.9	14104.5	15608.8	15887.9	10735.5	17457.1	10542.2	11734.2	13926.8	15867.3	17597.8	906.09	9212.8	8544.48	8233.5	11970.3	7940.67	11010.4	15022.5	22430.7	10516	17349.3	16196.8	10049.4	15851.5	7265.31	11721.6
K00002	AKR1A1, adh; alcohol dehydrogenase (NADP+) [EC:1.1.1.2]	1735.57	1013.16	1747.06	606.01	568.84	1728.34	1052.75	919.91	807.33	2047.84	2134.33	1835.49	1031.25	727.17	942.25	1892.91	2840.9	2421.67	1725.08	793.67	1344	1262.08	1491.32	873.83	1454.34	1826.42	60.49	697.33	655.83	557.67	947.5	882.83	993.66	1177	1278.66	992.66	1484.99	1833.9	1059.83	818.99	410	956.84
K00003	E1.1.1.3; homoserine dehydrogenase [EC:1.1.1.3]	17606.5	17787.7	18564.4	17560.9	14933.6	23891.8	22639	19570.4	16265.7	18773.5	14770.4	18445.6	13716	16881.8	19005.6	15053.1	17016.4	19110.2	19770.5	12667.2	19851.4	16075.1	14964.7	18758.4	19196.6	18190.4	1051.8	9322.99	12159.5	8833.85	15244.1	12106.9	16038.7	16284.3	19919	9557.08	22013.4	19548.3	12554.8	19198.4	9726.58	19410.4
K00004	BDH, butB; (R,R)-butanediol dehydrogenase / meso-butanediol dehydrogenase / diacetyl reductase [EC:1.1.1.4 1.1.1.- 1.1.1.303]	114.99	110.03	154.56	343.5	139.2	1134	166.86	168.83	140.5	199.88	113.84	168.46	304.99	581.87	749.24	128.33	175.49	170.33	229.41	120.09	531.5	139.87	108.1	168.33	185.44	241.53	40.73	62.33	142	200.6	288.87	732.78	385.5	634.5	1246.5	880	209	116.23	90.23	196	101.38	301.06
K00005	gldA; glycerol dehydrogenase [EC:1.1.1.6]	320.1	304	363.08	1318.88	185.27	2340.37	2356.2	1954.38	1767.96	320.65	411.95	930.48	630.28	748.75	864.6	307.34	510.34	1458.35	553.29	360.75	764.34	255.63	203.94	132.55	345.34	640.01	9.62	211.33	168.79	207.64	265.7	120.83	142.83	632.21	283.3	281.25	411.77	622.75	148.93	480.78	319.38	406.77
K00006	GPD1; glycerol-3-phosphate dehydrogenase (NAD+) [EC:1.1.1.8]	0	0	0	0	0	0	0	0	0	0	0	0	0	1	2	0	0	0	0	0	0	0	2	0	1	4	0	0	10	0	0	0	3	0	0	0	6	1	3	0	11	4
K00007	dalD; D-arabinitol 4-dehydrogenase [EC:1.1.1.11]	11.26	56.41	7.14	3	4.12	0	0	2	0	39.14	65.83	27.29	29	26	10	28.29	103.14	36	58	40	80	7	1.43	2	12.62	31.38	0	16	0	0.38	0	0.5	3	3	0	2	29.13	48	40.83	3	0	0
K00008	SORD, gutB; L-iditol 2-dehydrogenase [EC:1.1.1.14]	2780.85	3102.52	2975.76	3950.21	2183.76	5130.79	5305.67	4436	3814.8	4280.17	3603.44	3719	3468.03	3945.37	4526.46	4207.74	4336.88	4283.42	4404.44	2920.33	4824.18	3998.96	2928.56	4331.29	6887.26	7569.79	386.61	2339.33	2608.28	3282.58	2873.16	2057.11	3222.74	4312.27	4263.57	3037.41	5022.59	4926.79	2731.81	4942.37	2366.59	4140.71
K00009	mtlD; mannitol-1-phosphate 5-dehydrogenase [EC:1.1.1.17]	89.43	98.5	98.3	91.5	56.62	101	113.5	79.11	52.95	402.05	377.75	288.12	73.22	34.67	66.13	401.14	490.21	386.35	88.36	76.17	127.39	215.67	81.76	183.88	509.12	543.88	10	147	100	67.58	46.5	61.61	170	222.94	51.41	19	247.33	267.26	139.55	70.4	40.88	41.31
K00010	iolG; myo-inositol 2-dehydrogenase / D-chiro-inositol 1-dehydrogenase [EC:1.1.1.18 1.1.1.369]	1560.94	1648.94	1450.32	1674	1884.74	2179.33	2020.59	1797.4	1430.75	1600.14	1621.07	1722.91	703.68	1185.17	923.16	1492.78	1819.11	1924.16	964.91	840.01	858.09	1021.67	900.87	1845.38	1055.79	1880.38	66.33	1103.83	1198	506.38	811.67	812.72	750.17	645.69	954.5	1206	2108.63	1428.41	1121.07	627.66	791.14	950.91
K00012	UGDH, ugd; UDPglucose 6-dehydrogenase [EC:1.1.1.22]	19088.2	20061.5	19934.1	23157.7	18490.5	29725.3	27661.8	23725.2	19939	22012.5	17831	21322.4	16301.9	19249.3	21878.5	18041.5	20621.9	22444.3	23756.1	15116.4	23212.8	17628.7	16441.1	23803.6	21228.2	20521.6	1111.54	10752.5	13175	10053.8	18098.4	13918.8	18176.7	18663.7	21139.1	10696.3	24959.9	23382.9	14361	21016	11344.6	21837.8
K00013	hisD; histidinol dehydrogenase [EC:1.1.1.23]	18667.5	19710.1	19498.9	21726.5	18177.2	28821.6	25261.3	21784	18193.6	21154.2	17241.3	20608.5	15213.9	18796.3	21246.7	17294.5	19981.4	21563.8	21894.8	14103.3	22230.5	17146.6	15958.2	23443.3	20578	19764.3	1137.3	10431.8	13001.1	9856.26	17316.4	13772	17600.6	17729.4	20862.4	10428.6	24051.9	21968.2	13944.2	20471.9	10790.4	21339.5
K00014	aroE; shikimate dehydrogenase [EC:1.1.1.25]	19045	20558.8	19855.6	23662.5	18714.1	30021.2	28201.5	24203.1	20320.3	22297.6	17848.5	21512.9	15782.8	19299.5	21774.4	18196.9	20657	22531	22888.3	14989.9	22895	17278.1	16357.5	23868.4	21742.7	21567.5	1171.33	10857	13446.1	10300.5	17380.5	14078.5	17551.8	18396.2	21818.4	10886.2	25133.6	22777.4	14287.7	20909.3	11358.9	20666.3
K00015	gyaR, GOR1; glyoxylate reductase [EC:1.1.1.26]	3290.83	3423.24	3201.51	4661.66	3366	5751.49	5505.33	4701.44	3979.58	3521.51	2945.82	3159.17	2877.55	3417.6	4133	3263.83	3237.48	3381.08	4299.62	2923.83	4580.34	2874.5	2149	3733.68	3884.33	4937.17	214.83	2486.66	2333.84	2035.3	4623	2127.17	3653.5	2987.44	2975.44	1467.5	4617	3581.75	2395.91	4318.83	1498	4138.23
K00016	LDH, ldh; L-lactate dehydrogenase [EC:1.1.1.27]	1006.3	1018.55	1389.26	1874.82	1485.57	3403.49	2250.23	1899.16	1611.66	1771.04	1441.4	1606.93	1038.96	1406.84	1535.59	1521.29	1675.61	1697.49	1147.08	893.62	1634.28	2117.17	1646.35	1422	1421.53	1231.74	59.33	737.5	639.5	653.23	1064.4	559.12	1008	1511.83	568.32	589.67	2333.95	1949.6	796.07	1309	641.38	1034.39
K00018	hprA; glycerate dehydrogenase [EC:1.1.1.29]	1911.99	2478.61	1920.16	1277.13	2707.83	3383.87	2164.74	1803.38	1660.5	2821	2133.65	2649.76	1538.69	1898.72	1980.62	1819.03	2589.17	2391.61	2531.81	1316.01	1922.71	2662.73	2215.39	4324.18	2289.59	2604.12	118.65	1929.33	3209.79	836.55	1500.58	1406.75	1430.75	1260.13	8085.75	747.42	3208.51	2736.52	2305.37	1712.04	1280.54	1271.66
K00019	E1.1.1.30, bdh; 3-hydroxybutyrate dehydrogenase [EC:1.1.1.30]	4074.96	4810.29	3874.24	7166.25	5615.88	9040.41	7577.66	6531.77	5354.83	5679.66	5565.14	5133.43	4777.82	5206.66	6171.4	5413.81	6634.36	5826.99	6949.35	4868.34	6579.6	3442.02	4115.3	7551.51	6880.89	8521.11	344.35	3538.15	3576.34	3267.68	4548.91	3739.19	4050.5	5251.09	5552.02	3395.16	6714.05	6141.34	3967.87	6111.15	3182.54	3776.31
K00020	mmsB, HIBADH; 3-hydroxyisobutyrate dehydrogenase [EC:1.1.1.31]	12432.3	14115.3	11850.8	18198.9	15978.6	22794.7	19459.6	16840.9	13875.5	11848.3	11059.2	12592.3	11438.7	14184.1	16099.3	10378.3	12423.4	13430.7	15414	8551.45	15297.8	9328.41	8456.99	16176.9	14638.5	19410.2	791.12	7993.79	10405.5	6445	9286.67	9346.78	9386.27	12395.4	15641.9	7332.5	16504.3	13490	9269.82	11313.1	6684.53	11973.8
K00021	HMGCR; hydroxymethylglutaryl-CoA reductase (NADPH) [EC:1.1.1.34]	4089.66	3570.69	4158.14	3426	2225.93	5933.5	5331.17	4618.41	3887.71	5228.83	4376.16	4888.75	4176.92	4335.99	4710.58	4874.07	5182.38	5947.75	5910.16	4696.75	5342.68	3687.33	4617.65	4068.96	5617.76	5558.41	339.82	2578.66	2618.33	3136	3865.83	2531.33	4218.08	6184.9	5960.91	4339.99	6577.9	6212.14	3810.09	6019.82	3141.83	4010.09
K00023	phbB; acetoacetyl-CoA reductase [EC:1.1.1.36]	4074.83	5138.92	3652.01	7122.17	10044.3	7226.83	4871.83	4184.75	3550	4008.75	4094.92	4557.83	2934.08	3987.67	4222.91	3637.83	4845.83	4909.41	4384.84	2595.51	3521.91	2676.42	3572.25	9526.01	2983.92	4122.74	195.83	2335.66	4989.34	1341.3	3199.92	3671.92	3131.25	2217.25	1691.5	1215	5231.76	5007.08	4327.92	2675.74	2505.83	2350.33
K00024	mdh; malate dehydrogenase [EC:1.1.1.37]	15373.1	17829.7	15436.5	19155.9	15828.3	25391.8	22734.2	19511.4	16533.9	18925.5	16052	18308.3	13270.4	17314.2	19054.2	15953.6	18913.5	20003.5	18853.9	13554.9	19569.9	14415.2	13411.1	20673	18362.8	17282	1025.81	9625.82	11794	8892.41	15669.2	12839	16205.2	16139.8	20237.1	9960.33	20285.5	19736.5	12621	19477.1	9982.2	20366.7
K00025	MDH1; malate dehydrogenase [EC:1.1.1.37]	0	0	0	0	0	0	0	0	0	0	0	0	0	0	0	0	0	0	0	0	0	0	0	0	0	0	0	0	0	0	0	0	0	0	0	0	0	0	0	4	6	0
K00027	ME2, sfcA, maeA; malate dehydrogenase (oxaloacetate-decarboxylating) [EC:1.1.1.38]	7972.4	8142.98	8300.75	14539.7	9138.57	13378.9	13356.2	11438.2	9746	7804.55	6191.52	7972.47	5652.5	7159.24	7985.8	5834.55	6827.25	7875.46	7291.8	5243.31	7822.16	5899.53	6282.55	12762.6	6549.46	5569.89	365.27	3416	4140.24	3157.11	7163.92	6302.53	5912.24	6883.64	3773.49	4622.17	6998.47	8654.05	4649.66	7187.58	3665.61	11543.3
K00029	E1.1.1.40, maeB; malate dehydrogenase (oxaloacetate-decarboxylating)(NADP+) [EC:1.1.1.40]	11758.5	13238.6	11777.1	13815.2	13931	21158.7	16713.8	14543.7	12064.3	14923.1	13142.6	14206.4	10744.6	12462.4	14405.8	12750.1	15511	15561	15650.6	9974.18	15258.8	10802.8	10488.6	16673.2	14217.4	16312.5	821.01	8260.15	9987.01	7077.21	11459.6	10258.3	12498.1	12932.2	18143.1	7624.33	17741.3	15090.1	10710.2	13184.3	7407.15	10102.5
K00030	IDH3; isocitrate dehydrogenase (NAD+) [EC:1.1.1.41]	1499.76	2030.87	1774.24	2527.03	2179.66	4075.78	3652.33	3159.2	2794.38	2249.35	1628.06	1995	1693.91	1659.55	2156.38	2001.04	1831.08	2093.36	2338.66	1724.75	2835.06	2074.28	1795.26	2580.39	1476.49	1491.89	129.11	894.5	1009.12	1103.75	1513.67	1181.18	1490.5	1473.38	738.9	627.92	2571.59	2409.84	1389.86	2348.21	939.38	2566.17
K00031	IDH1, IDH2, icd; isocitrate dehydrogenase [EC:1.1.1.42]	17795.4	18611.1	18173.5	18696.2	17110.1	26968.5	25038.8	21367.6	17821.1	20191	17523.1	19700.6	14068.2	17370.9	19572.9	16850.9	20467.5	20765.6	21387.7	14476.8	20867.4	15336.4	14445.5	22137.1	17555.4	18250.2	1024.71	10632.1	12512.8	8937.31	15846.1	12383.2	16192.5	16265.3	20148.1	9680.83	23395.1	21516.2	13930	19973.2	10674	16975.8
K00032	E1.1.1.43; phosphogluconate 2-dehydrogenase [EC:1.1.1.43]	80.33	63.44	54.7	30.67	20.83	86.67	57.83	53.75	46.42	33.25	39.82	22.53	301.62	54.67	105.91	20	32.17	20.5	613.16	181.34	228.75	44.35	118.39	37.5	121.92	130.58	5.53	21.83	54.5	51	146.42	73.25	78.75	5.25	3.75	4.5	46.73	93.53	78.2	75.58	85	34.66
K00033	PGD, gnd, gntZ; 6-phosphogluconate dehydrogenase [EC:1.1.1.44 1.1.1.343]	10279	11035.7	10965.7	12717.9	9783.17	17986.5	14630.4	12461.3	10670.1	14123.8	11129.1	13526.9	10696.4	12375	14404.3	11965.5	12909.3	15427.9	14616.3	9669.83	14981.9	12322.3	10164.8	13934	13688.4	14853	687.27	6392.66	7196.45	6650.29	11017.7	7845.51	11529.9	12826.2	17834.8	7700.58	15699.4	14191.5	8761.62	13319.1	6252.18	14113.2
K00034	gdh; glucose 1-dehydrogenase [EC:1.1.1.47]	993.66	1219.83	1016.8	825.83	701.51	1782.5	1601.83	1391.49	1142	1285.57	1209.4	1279.66	1463.24	1652.93	1851.33	1178.06	1364.47	1322.42	1714.07	1042.25	1847.18	1777	1347.65	1771.83	4570.51	5390.49	196.99	955.16	1384.33	1728.33	1309.66	1060.05	1198.33	1695.48	1115.16	1352.99	1568.57	1612.3	876	1550.32	849.09	974.5
K00035	gal; D-galactose 1-dehydrogenase [EC:1.1.1.48]	604.83	526.17	578	471.17	167.33	722.67	584.83	486.25	409.92	367.75	506.25	372.83	483.92	252.67	310.91	296.5	492.17	324.5	890.66	335.84	339.25	327.75	389.09	436	909.92	1052.58	18.33	100.33	217.5	127	300.92	431.25	226.75	185.25	546.25	236.5	407.33	486.33	441.17	203.75	503.5	121.66
K00036	G6PD, zwf; glucose-6-phosphate 1-dehydrogenase [EC:1.1.1.49 1.1.1.363]	8730.22	10606	9243.27	12603.2	12136.6	15554.5	10730.3	9148.1	7776.86	10995.9	8600.37	10755.7	7637.62	10655.6	11602.5	8568.74	9832.17	10993.1	10522.8	6494.42	10205.4	10180.6	7602.37	15090.4	10163.2	11324.8	578.18	5999.33	8430.62	4695.89	10273.9	8600.04	10352.8	8095.49	20798.5	4226.76	12253.4	10100.6	6522.4	7959.61	4320.25	10072.7
K00038	E1.1.1.53; 3alpha(or 20beta)-hydroxysteroid dehydrogenase [EC:1.1.1.53]	117	195.33	140	22	19	253	46	40	40	74.5	67	97	45.5	72	62	46.5	103	74	52.5	136.33	76	116	60	91	720	1010	16	210	62	178	125	142	181	34	76	35	98.51	76	79	47	49	147
K00039	rbtD; ribitol 2-dehydrogenase [EC:1.1.1.56]	14.26	20.08	20.97	0.5	2.12	1	1.83	0	1	13.64	20.83	11.12	19.33	5	21	13.62	16.97	13.5	70.66	42	143.5	29	10.93	3	12.62	23.38	3	15	6	48.38	7	8.5	13	0	1	5	43.79	19	18.16	11	0	16.33
K00040	uxuB; fructuronate reductase [EC:1.1.1.57]	668.65	640.8	658.74	1167.43	392.45	1336.08	1675	1454.01	1241.93	694.36	796.7	721.92	991.83	1184.83	1275.14	615.18	858.68	753.18	1135.16	465.51	747.44	378.68	368.69	466.43	469.88	424.72	29.57	317.16	273.91	327.41	417.92	478.25	330.25	1016.51	705.72	526	729.23	757.99	537.2	305.24	371.76	268.32
K00041	uxaB; tagaturonate reductase [EC:1.1.1.58]	142.29	202.88	146.77	624.05	88.29	801.79	1098.5	948.55	828.71	297.48	325.62	302.66	224.62	289.61	340.85	294.34	430.13	424.39	182.37	93.08	262.52	195.13	73.18	166.88	207.79	121.59	9.12	153.33	104.12	130.49	97.83	18.78	70.34	78.05	58.47	49.25	231.9	318.59	135.45	86.95	29.59	92.7
K00042	garR, glxR; 2-hydroxy-3-oxopropionate reductase [EC:1.1.1.60]	1932.97	2213.53	1813.72	4839.17	2490.12	7640.91	4466.75	3885.83	3228.41	2665.13	1767.75	2534.68	3339.59	3817.96	4401.86	2026.27	1994.13	2419.15	3457.22	1434.59	4171.41	3266.12	1836.45	3310.93	5270.96	5862.29	258.4	1701.49	2712.51	2413.91	1837.25	2920.75	3948.09	4742.25	1890.85	2441.83	3526.6	2782.68	1744.34	2862.62	984.66	5275.55
K00043	gbd; 4-hydroxybutyrate dehydrogenase [EC:1.1.1.61]	58	79	49.5	408	36	988	95	123	85	63	55	84	197	349	379	52	47	75.5	139	40	158	49.5	100	42	15	24	6	48	18	30	104	253	60	505	79	167	77	205	75.5	38	16	10
K00045	E1.1.1.67, mtlK; mannitol 2-dehydrogenase [EC:1.1.1.67]	1415.16	1232.77	1322.7	1913.17	1770.33	3287.67	1952.83	1719.75	1349.92	846.25	878.82	854.48	928.29	1143.67	1258.24	788.95	917.75	828.62	1309.49	595.01	937.25	620.85	797.72	1183	635.92	1177.58	64.53	930.83	894.5	493	527.42	654.25	425.25	809.25	941.75	594.5	1281.43	1012.53	881.7	497.25	680	325.83
K00046	idnO; gluconate 5-dehydrogenase [EC:1.1.1.69]	2604.11	2860.33	2471.03	2659.33	2551.83	4964.25	2723.33	2378.93	1840.42	3242.65	2918.13	3068.57	2133.9	2357	2799.32	3204.12	3530.47	3410.58	3126.88	1773.92	3382.59	2180.43	1788.97	2698.67	3451	4644	119.36	1667.83	1493.5	1186.33	1264.67	1651.17	1579	1753.38	1872.72	1199.5	3783.34	3115.03	2048.87	2516.5	1155.83	1435.79
K00048	fucO; lactaldehyde reductase [EC:1.1.1.77]	1.26	0.41	0.14	2	3	6.67	16	17	14	10.14	3.83	6.29	0	0.4	2.8	5.39	3.24	3.1	2	0	0.1	3	2.43	0	4	10	1	3.5	5	8.53	17	11	15	1.5	0.3	28	2.94	1.1	0.83	0.4	0	0
K00050	ttuD; hydroxypyruvate reductase [EC:1.1.1.81]	9150.4	9604.67	9242.5	10520	11068.3	17611.4	13681.3	11740.8	9804.58	11295.8	9119.47	10952.3	8846.69	11779.5	12905.9	9922.36	10434.9	11960.3	12229.8	8518.58	12553.1	9579.42	8755.11	13166.7	12340.2	12791.4	650.35	6844.33	8813.16	5578.6	9872.83	7748.17	11014.1	10085.4	16548.9	6388.66	13520.7	11951.9	8070.77	11791.4	5555.83	9851.43
K00051	E1.1.1.82; malate dehydrogenase (NADP+) [EC:1.1.1.82]	0	1	1	0	0	0	1	1	0	2	1	1	4	0	11	2	1	1	1	0	10	0	0	1	0	0	0	0	0	0	0	0	9	0	6	2	1	0	2	0	11	0
K00052	leuB, IMDH; 3-isopropylmalate dehydrogenase [EC:1.1.1.85]	18453.2	19198.3	19387.3	19624.9	16080.5	27290.6	24525.3	21151.7	17634.5	20591.9	16593.7	20004.7	15063.9	18487.4	20925.2	16793.7	19262.8	21014.6	21477	13903.1	21906.7	16941.6	15611.7	20491.2	20852.3	20504.9	1123.13	10356.1	12789.6	9768.26	16418.1	12757.7	17030.1	17726.6	20830.8	10511.1	23613.1	21577.1	13589.1	20297.9	10631.4	20987.4
K00053	ilvC; ketol-acid reductoisomerase [EC:1.1.1.86]	18217.6	18853.9	19093.9	19095.7	15947.5	26753.5	24177.5	20804.8	17346.3	20230.4	16271.3	19716.2	14749.5	17884.4	20361.7	16457	18900.1	20655.4	21282.8	13694.6	21588.5	16632.8	15468	20306.4	20141.9	19424.8	1109.8	10176.6	12658.8	9538.26	16205.9	12657	16735.8	17220	20554.9	10251.4	23180.7	21215.1	13331	20192.9	10501.4	20877.3
K00054	mvaA; hydroxymethylglutaryl-CoA reductase [EC:1.1.1.88]	1177.58	1390.16	1350.75	4226.83	2865.53	3350.83	2886.12	2443.07	2138.32	3052.12	2785.79	2637.74	1942.24	2165.88	2524.99	2883.18	3597.57	3226.08	3104.59	1181.51	2396.37	1576.08	1089.33	3929.5	1885.94	2066.61	142.33	801.83	1007.5	1345.77	4197.37	1998.84	2281.5	1913.67	1993.32	710.67	2436.15	1758.74	1288.82	1600.16	1139.5	1781.23
K00055	E1.1.1.90; aryl-alcohol dehydrogenase [EC:1.1.1.90]	42.97	59.96	73.31	137.17	19.45	400.67	307.5	253.5	218.67	106	58.67	92	524.84	423.17	533.66	84.67	60.34	104.5	760	231.34	572.5	82	76.27	123	189.79	226.71	27.33	113.33	73	197.88	92.17	137.5	212	620.33	558	573	173.5	68.33	52.67	241.83	126	147.83
K00057	gpsA; glycerol-3-phosphate dehydrogenase (NAD(P)+) [EC:1.1.1.94]	14729.8	16401.8	15341	18762.5	15679.8	22952.5	21170.4	18121.4	15215.7	15909.6	13405.4	15695.8	10426.4	13814.5	15483.9	12343.7	15449.5	15470.6	15183.9	9610.81	15364.1	12929.4	11250.6	19289.8	14534.1	14001.6	747.48	8035.83	10487.1	6534.76	11385.1	11101.5	12918.1	11559.1	14668.1	6410.76	17272.2	16501.6	10459.9	13171.1	7984.58	15784.4
K00058	serA, PHGDH; D-3-phosphoglycerate dehydrogenase / 2-oxoglutarate reductase [EC:1.1.1.95 1.1.1.399]	26735	26176.9	27994.7	28050.9	20774	37273.1	36219.1	31162.1	26075.9	33125	26752.3	31540.4	22465.8	28678.4	31697.8	28267.9	31601.4	35010.4	31946	20439.6	32515.2	25376.3	22954.8	28264.2	34433.4	35427.4	1641.55	15760.6	17336.6	15434.9	23385.3	19007.3	24487.7	28458.2	29611.9	17975.8	34333.6	31299.1	20115.5	28551.8	15214.5	28286.2
K00059	fabG; 3-oxoacyl-[acyl-carrier protein] reductase [EC:1.1.1.100]	63997.3	66839.4	65768.4	75322.6	52432.9	98116	90266.7	77923.3	65023.1	71215.6	58859.9	68407.4	55908.2	67389.6	75024	59787.1	68132.1	72549.4	81219.4	55505.6	79257.1	56558.8	53708.8	72004.8	77089.7	79340.5	3911.88	36791.4	42420.7	36017.1	60016.3	47013.2	61494.2	64312.3	68362.2	43504.6	82279.3	77179.7	47405.3	78303.3	40769.7	76835.4
K00060	tdh; threonine 3-dehydrogenase [EC:1.1.1.103]	1693.59	1892.07	1477.8	4845.66	3905.2	3706.33	4503.17	3798.91	3331.03	2562.56	2379.99	2427.61	1862.19	2820.18	3232.56	2454.93	2841.87	2783.55	2582.54	1764.59	2561.57	1403.33	1141.59	3818.97	1764.54	2208.13	94.5	1254.5	1162.67	791.41	2155.5	1990.95	1574.42	2138.75	1392.96	903.17	2220.98	2035.26	1306.91	1976.4	1125.21	1616.38
K00064	E1.1.1.122; D-threo-aldose 1-dehydrogenase [EC:1.1.1.122]	314.75	313.75	329.91	373.84	130.12	382	190.08	184.19	132.41	1037	1221.5	821	359.3	449.17	522.41	1046.91	1711.91	1167.75	744.35	425.84	726.83	437.08	276.33	396.33	1877.79	2542.46	21	461.5	180	433.88	165	203	263	187.11	319.61	246.5	586.66	813.83	481.08	314	130.5	412.89
K00065	kduD; 2-dehydro-3-deoxy-D-gluconate 5-dehydrogenase [EC:1.1.1.127]	1695.56	1451.94	1600.37	1556.88	2020.74	2016.45	1980.76	1786.63	1384.34	1215.45	1337.74	1275.28	900.15	1359.45	1410.42	1164.5	1443.51	1405.5	1302.93	453.59	1306.44	755.22	785.03	1166.22	1361.71	2078.34	74.95	992.16	1041.29	671.83	749.92	1215.36	819.25	1405.37	1518.94	944.75	1656.76	1367.67	989.69	788.36	610.26	483.07
K00066	algD; GDP-mannose 6-dehydrogenase [EC:1.1.1.132]	527	451.93	411.53	245	147	991	98	87	70	161.67	191.4	218.53	104.2	58.67	77.67	184	254	214	137	47.67	69.67	61.6	94.8	96	46	184	8.2	11	42	11	44	14	12.67	49	54	74	444.4	163.2	163.2	147	230.33	147.33
K00067	rfbD, rmlD; dTDP-4-dehydrorhamnose reductase [EC:1.1.1.133]	14339.6	15573	15024.5	15644.5	13649.9	20547.2	17294.9	14859	12259.2	15893	13089.1	15423.9	10889.7	12783.1	14976.1	12399.1	15299.9	15240.1	17116.2	10231.1	16660.5	12956.6	11379.7	17133.5	15951.7	15665.9	713.72	7726.49	8654	6490.78	12903	10011.6	13337.3	10573.9	15132.4	5794.84	18375.8	16826.2	10260.8	15211.7	7895.03	16759.6
K00068	srlD; sorbitol-6-phosphate 2-dehydrogenase [EC:1.1.1.140]	21.18	74.24	30.75	22	21.63	26.84	41.5	36.49	33.29	71.14	105.69	133.54	61.5	35.22	83.13	89.38	145.52	214.77	96.91	44	132.06	60.5	28.51	47.71	69.63	126.54	3.99	82.66	68.33	18.41	70.66	174.83	75.83	173.65	48.96	27.99	75.26	32.74	19.62	88.72	53.33	72.17
K00073	allD; ureidoglycolate dehydrogenase (NAD+) [EC:1.1.1.350]	16.62	10.78	8.67	4	0.5	0.33	0	1	0.5	29.17	31.87	24.25	3.83	0.4	2.97	32.1	41.26	21.6	12.92	2.5	3.35	7.17	8	0.67	0.67	4.5	0	6.33	3.67	1.2	0	0.11	8.67	1.5	4.3	0	19.15	8.77	25.62	0.4	1.38	0
K00074	paaH, hbd, fadB, mmgB; 3-hydroxybutyryl-CoA dehydrogenase [EC:1.1.1.157]	15637.8	16667.4	15989.8	20974.5	12501.9	25209.7	19570.1	17113.6	14379.9	19634	16155.4	18554.6	14535.7	20520.3	22421.7	17224.1	18770.2	20659.8	18888.3	13374.5	20509.7	13292.7	13044	16457.2	20243.2	21854.6	1090.47	10115.1	9753.12	9735.25	13016.8	11649.7	14693	20161.7	14752.5	12219.2	21161.8	19654.6	12802.6	18752.4	9995.45	21707.5
K00075	murB; UDP-N-acetylmuramate dehydrogenase [EC:1.3.1.98]	14902.2	16454.2	15702.8	19922.7	15974.1	23391	21510.1	18392	15450.4	16503.7	13402.8	16128	11083	14306	16170.8	12836.1	15462	15930	16329.8	10034.3	16054.3	13767.8	11716	19835.8	15358.6	14891.9	769.48	8226.16	10658.8	6763.76	13967.3	11298.9	13848.6	11666.4	15602.2	6521.09	17986.2	16590.3	10327.1	13669.1	7860.58	16188.7
K00076	hdhA; 7-alpha-hydroxysteroid dehydrogenase [EC:1.1.1.159]	1315.5	1261.25	1241	1691	1756.5	2374.67	1854.5	1638.5	1278.5	799.5	895.83	862.5	759	1067.07	1211.8	740.43	991.1	814.1	901.5	463	929.1	570	598	1127.5	632.25	1256	54	832	811	340.03	393.5	765	507	744.5	1031.3	512	1153.98	869.1	784.5	574.4	511	290.5
K00077	panE, apbA; 2-dehydropantoate 2-reductase [EC:1.1.1.169]	8309.19	7773.4	8623.47	7587.89	6886.81	14962.6	10947.5	9445.62	7834.88	9967.69	8184.27	9314.12	7604.76	9400.55	10608.5	8417.03	9756.37	9965.63	11536.8	7888.34	11226.5	8544.6	7278.18	8423.14	11619.6	11555.2	569.55	5158.16	5560.66	5185.82	8211.44	6315.99	9158.84	9674	9573.08	6006.18	10324.3	9234.51	6534.72	9982.14	5097.91	8069.62
K00082	ribD2; 5-amino-6-(5-phosphoribosylamino)uracil reductase [EC:1.1.1.193]	44.5	55.5	68.5	48.5	9.5	76	112.5	101.5	72.5	105.5	108	85.5	61.5	75	58	99.5	124.5	102	122.5	290	93	97.5	58	49	226.5	384.5	2.5	69	40	26	55	7.5	19.83	39.66	27.5	16.5	214.5	328	64.5	97	88	94
K00086	dhaT; 1,3-propanediol dehydrogenase [EC:1.1.1.202]	207.96	232.91	239.84	247.5	56	559	848.5	712	663.5	467.5	205.62	412.5	278.3	356.4	456	105	214.5	182	321	95.3	345.3	603.5	290.93	546	91.5	23	3	58.5	60	28.7	45	56.5	58.5	260	59	62.5	112.25	195.2	113.82	319	81	191.5
K00087	ygeS, xdhA; xanthine dehydrogenase molybdenum-binding subunit [EC:1.17.1.4]	469.5	384.24	659	1132	305.5	492.5	229	171.26	144.5	740	266.5	579.5	779.5	672.4	819.8	594.1	277.1	574.1	1294.5	352	835.6	853	421.5	464.5	869	912.5	20	198.5	185	314.2	813.5	196.5	557.5	475.5	271.8	100.5	915.4	366.1	149.5	628.9	139.5	559
K00088	IMPDH, guaB; IMP dehydrogenase [EC:1.1.1.205]	26817.9	27233.1	27500.6	31354.9	25120.8	42863.8	38702.9	33428.4	28148.9	33110	26852	32047.7	24622.3	29195.3	33130.4	28262.1	31321.4	35729.1	34429.6	23263.8	35329	25133	24602	34777.3	32065	31831.6	1828.74	16144.8	18958.1	16575.3	26227.6	20684	26226.1	30084.5	32661.2	20595	35925.8	32993.3	21085.7	32735.7	17220.4	32285.4
K00090	ghrB; glyoxylate/hydroxypyruvate/2-ketogluconate reductase [EC:1.1.1.79 1.1.1.81 1.1.1.215]	35.26	67.15	59.67	180	30.12	17.67	21.33	41	18	28.14	23.23	41.82	9.03	4.4	41.8	22.05	41.04	27.1	8.91	4	65.35	31.6	24.23	11	31.62	50.88	3.2	54	29	14.91	49	2.61	27	208	16.3	13	37.26	43.3	38.47	4.4	1.38	14.08
K00091	E1.1.1.219; dihydroflavonol-4-reductase [EC:1.1.1.219]	1564.16	1215.33	2107.35	2879.98	817.58	2556.66	2341.68	1968.57	1648.91	1815.67	1390.38	2236.79	1613.93	1577.51	1843.42	1517.59	1489.39	2671.91	2060.34	1068.58	1775.39	2372.92	1242.3	1253.92	3755.91	4241.59	53.86	602.34	545.16	706.3	1441.17	555.51	1341.41	1708.08	874.73	509.84	2539.29	2049.35	891.93	1613.5	596	1175.42
K00094	E1.1.1.251, gatD; galactitol-1-phosphate 5-dehydrogenase [EC:1.1.1.251]	0.12	0.12	0	0	0	1.67	0	0	0	0.14	0.83	0.29	0	0.8	1.6	0.49	1.34	0.2	0	0	0.2	0	0	0	2	0	0	0	0	4.73	0	0	0	1	0.6	0	1.76	1.2	0.83	0.8	0	0
K00096	araM, egsA; glycerol-1-phosphate dehydrogenase [NAD(P)+] [EC:1.1.1.261]	4040.49	3571.4	4123.06	3318.83	2433.93	6224.16	6338.5	5515.24	4628.76	5339.83	4341.65	5085.75	4443.92	4694.26	5432.91	5034.23	5185.04	6433.74	6115.16	4718.75	6555.19	3739.5	4494.82	3765.58	5514.76	5355.08	385.32	2575.16	2642.33	3410.5	3846.83	2673.44	3970.25	6257.4	5537.41	4185.99	6493.7	5782.89	3782.7	7303.15	3030.21	5318.09
K00097	pdxA; 4-hydroxythreonine-4-phosphate dehydrogenase [EC:1.1.1.262]	11369.4	12513.5	11755.2	13899	12749.9	18091.5	16778.5	14279.2	11933.6	13259.8	11409.5	13159.2	7982.81	10789.1	12484	10544.7	13226.9	13387	12948.9	8084.35	13009.9	9612.47	8486.01	16265.5	10197	11424.5	586.81	7109.49	8557.29	5367.22	9088.58	8911.09	10559.2	8454.24	13066.4	4204.09	14193.4	13718.7	8850.51	10814.5	6542.2	10260.3
K00098	idnD; L-idonate 5-dehydrogenase [EC:1.1.1.264]	183.67	174.33	165.67	248.5	119.5	97.58	62	93	67.75	141.58	122.83	149.42	218.5	399	400.67	89.58	114.83	130.5	209.92	183.17	279.25	143	97.17	97.17	686.67	983	16	283.33	101.67	215	236	602	150.17	470	534.5	306	148	70.83	78	78	4	84.5
K00099	dxr; 1-deoxy-D-xylulose-5-phosphate reductoisomerase [EC:1.1.1.267]	13959.2	15228.5	14554	15809.2	13201.2	20542.1	19447.8	16646.2	13980	14266.4	11227.1	14230.5	9728.54	12950.1	14600.4	10755.5	12694.9	13671	14012.6	9284.14	14578.5	12401.1	10812.6	16154.2	13990.4	13592.2	696.48	7575.99	9960.46	5891.99	10114.4	9931.03	11820.6	10741.9	14039.9	6149.42	16219.1	15463.2	9455.59	13043.8	7107.08	15056.3
K00100	bdhAB; butanol dehydrogenase [EC:1.1.1.-]	9490.97	7957.82	9642.88	9543.91	7196.38	16205.7	12785.9	11349.4	9605.15	14162.2	11600.1	13069.9	9541.68	11297	13059	13322.5	14087.6	16650.4	13440	8911.18	14036.8	8852.65	9543.55	9134.09	14981.9	17451.5	660.76	6221.47	5929.61	5612.76	7057.83	7206.65	8655.39	12169.1	10833.2	8754.05	14535.9	12245.4	7593.89	13280.6	5879.59	9211.71
K00101	lldD; L-lactate dehydrogenase (cytochrome) [EC:1.1.2.3]	3993.95	4137.68	3641.71	4453.43	4150.45	7210.74	4824.41	4271.5	3425.28	2996.39	3461.51	3292.45	2791.22	3377.58	3750.37	2721.14	3926.79	3272.85	3741.26	2036.68	3371.68	1688.87	1817.9	3122.32	2536.31	4623.62	177.56	2082.97	2259.19	1236.58	1635.92	2170.09	2025.77	2186.59	3060.38	2166	4121.57	3185.33	2619.2	2197.24	1485.66	1785.57
K00102	LDHD, dld; D-lactate dehydrogenase (cytochrome) [EC:1.1.2.4]	3054.08	2902.32	2859.34	3379.5	2756.92	4306.41	4688.92	4142.89	3377.17	3665.5	3026.75	3438.33	2791.02	3198.67	3509.91	3493.41	3585.48	4256.58	4130.97	3111	3742.42	2000.5	2391	2343.17	4284.42	5364.75	141.83	2494.83	2083.17	1357	3028.17	1912	2769.42	3486.63	2903.47	1519	4593.67	3832.17	2137.67	4603.25	1943	3018.54
K00103	GULO; L-gulonolactone oxidase [EC:1.1.3.8]	115	79	143	57	21	163	53	41	38	256	301.33	235.5	59	32	84	237	322	281	136	58	98.5	200	114.5	162	200	255	14	159	77	135	108	155	250	62.5	75.5	50	143.67	212	168.5	62	83	144
K00104	glcD; glycolate oxidase [EC:1.1.3.15]	13443.5	14162.6	13946.3	12735.2	12814.3	14860	14487.4	12632	10314.8	12338.8	9041.88	12633.1	8186.82	12071.6	12998.9	8441.76	9936.15	11035.8	12765.2	8316.11	12580.9	11813.5	10425.9	15107.5	13309.7	11691	690.48	6251	9469.45	5207.31	11043.9	9622.7	11183.2	8243.98	13454	5001.09	14496	13142.8	8529.85	11937.6	6421.75	14012.1
K00105	E1.1.3.21; alpha-glycerophosphate oxidase [EC:1.1.3.21]	25	27	44	113.33	42.67	126.33	207.33	147.33	144.33	17.84	16.92	12.42	9.67	2	12.25	14.5	17.33	18.83	5.25	0.5	31.25	8.33	3	30.33	7.67	18	0	23.5	8	2	5	15.67	6	3	0	3	13.33	14	5.33	13	0	9
K00106	XDH; xanthine dehydrogenase/oxidase [EC:1.17.1.4 1.17.3.2]	0	0	0	3	0	0	0	0	0	0	0	0	0	0	0	0	0	0	0	0	0	0	0	0	0	0	0	0	0	0	0	0	0	0	0	0	0	0	0	0	0	0
K00107	ALO; D-arabinono-1,4-lactone oxidase [EC:1.1.3.37]	1	0	4	0	0	0	0	1	0	2	1	1	0	0	0	1	1	5	0	0	0	0	0	1	0	2	0	0	5	0	0	0	0	0	11	1	5	3	0	0	0	0
K00108	betA, CHDH; choline dehydrogenase [EC:1.1.99.1]	4105.33	3956.89	3770.75	4493.33	4490.78	7711.83	5277.58	4637.41	3757.45	3075.22	3520.94	3219.19	3474.81	3517.74	4246.95	2882.54	3917.94	3406.99	5530.66	2774.77	4723.27	2119.64	2488.17	3064.48	5910.79	8976.69	198.76	2982.49	2814.84	1509.58	2071.01	2155.84	2513.83	2587.66	3105.04	1575.67	4281.72	3873.52	2811.5	3775.96	1702.99	2220.83
K00109	L2HGDH; 2-hydroxyglutarate dehydrogenase [EC:1.1.99.2]	101	58.5	113	34	56.5	33	33	15.5	16.5	92	98	85	48	23	72	100	91	102.5	98.5	41	61	130	51.5	57	110	145	8	70	30.5	54.5	91	49	71	70	48.5	39	75	75	57	60.5	59	137.17
K00111	glpA, glpD; glycerol-3-phosphate dehydrogenase [EC:1.1.5.3]	21100.5	21443.2	21865.8	24824	19217.6	29631.8	28743.1	24491.5	20774.6	22455.7	17981.8	21747.6	15833.9	21046.4	22407.7	18353.8	20249.5	22177	21808.2	14826.8	20591.9	18631.4	18107.7	25186.1	24252.3	23437.9	1306.52	11424.6	14007.1	11357.2	18304.8	14967.1	18865.6	19619.4	23201.9	13630.7	23355.2	22569.7	14966	20163.4	11029.6	18715.6
K00112	glpB; glycerol-3-phosphate dehydrogenase subunit B [EC:1.1.5.3]	3435.12	2799.72	3484.31	2660.83	1838.55	4100.84	3721.01	3252.62	2737.37	4010.48	3233.49	3908.71	3159.91	3529.89	3890.38	3771.63	3878.78	4867.02	4060.83	2953.58	3820.62	2888.16	3664.25	3309.96	4514.05	4671.79	299.32	2097.66	2261.16	2721.41	2727.66	2078.17	3191.75	5133.07	5090.54	3987.66	4420.08	4165.6	2807.11	3506.22	2303.66	2509.42
K00113	glpC; glycerol-3-phosphate dehydrogenase subunit C [EC:1.1.5.3]	3712.45	3205.89	3782.48	3180.83	2287.05	6057.34	5609.51	4869.12	4034.7	4668.48	3800.16	4543.04	4172.91	4342.89	5029.71	4355.63	4525.44	5710.02	5406.5	3856.58	5694.62	3404.83	4040.41	3570.13	5262.38	5011.12	324.32	2303.66	2361.16	2858.41	3342.66	2267.17	3615.08	6141.57	5345.54	4099.66	4986.58	4852.6	3117.94	6300.72	2706.66	4903.42
K00114	exaA; alcohol dehydrogenase (cytochrome c) [EC:1.1.2.8]	212.67	269.52	204.2	232.33	41.67	1091	146	115.5	111.75	209.66	252.24	154.86	101.36	39.5	79.66	162.5	324.33	145.41	116.33	320.17	171.5	144.6	124.97	86	1191	1703.33	12.7	273	80	106.8	128.67	21	165	103.5	105.25	59	345.4	241.12	214.06	102.49	73.66	65
K00115	GLD; glucose 1-dehydrogenase (FAD, quinone) [EC:1.1.5.9]	0	0	0	0	0	0	0	0	0	0	0	0	0	0	0	0	0	0	0	0	0	0	0	0	0	0	0	0	0	0	5	0	0	0	0	0	0	0	0	0	0	0
K00116	mqo; malate dehydrogenase (quinone) [EC:1.1.5.4]	4003.35	3989.98	3965.68	2484.68	1853.91	6752.67	4712.66	4026.11	3414.49	4264.97	3885.17	4110.58	3957.94	3588.5	4560.87	3916.62	4472.2	4696.84	5236.09	3591.18	5764.6	3165.45	3963.8	4962.58	5818.33	6187.16	315.06	2137.16	2252.5	2735.59	2713.33	1824.5	2897.34	5107.78	4789.24	3854	5269.95	4609.5	3497.21	5407.31	2190.65	4495.47
K00117	gcd; quinoprotein glucose dehydrogenase [EC:1.1.5.2]	1317.58	1781.95	1364.56	2662.34	1896.79	5506.59	3017.16	2301.9	2140.92	3192.73	3002.88	2794.57	1437.96	1695.06	1776.61	3311.8	3856.67	4033.85	1875.48	1182.68	1589.03	1629.09	1659.31	2233.08	2187.88	2169.37	81.68	1831.82	991.33	889.41	1196.25	855.25	1115.75	1715.57	576.87	600.99	3292.64	4211.1	1954.04	1158.05	731.16	797.75
K00118	gfo; glucose-fructose oxidoreductase [EC:1.1.99.28]	257.5	378.66	266.33	631.84	569.5	1312	817	612.33	567.16	273.67	356	278.17	129.33	236.17	222.33	320.33	431.16	387	105.33	132.5	104.83	240.83	346.33	521.33	125.17	134.33	15.5	401	227	227.5	119	42	164.5	179.17	113	103.5	433.66	854	368.5	149.5	74.5	117.5
K00121	frmA, ADH5, adhC; S-(hydroxymethyl)glutathione dehydrogenase / alcohol dehydrogenase [EC:1.1.1.284 1.1.1.1]	4168.84	4262.45	4050.11	6046.91	4487.61	8284.42	5064.58	4351.77	3683.61	3695.32	3277.88	4120.12	3738.13	4494.84	5249.37	2826.54	3591.6	4414.66	4924.06	2649.93	4972.1	4095.37	2612.44	3814.64	5845.63	6745.45	182.23	2508.83	2954.17	1588.58	3071.08	4026.36	5271.07	3926.02	2663.74	2032.84	3954.6	3691.74	2198.49	3702.72	2299.37	6591.68
K00122	FDH; formate dehydrogenase [EC:1.17.1.9]	1978.16	1934.84	1834.84	2176.67	3500.33	3902.67	2387	2057.25	1647.25	1434.75	1560.59	1728.66	1339.5	1375	1485.24	1378	1851.5	1945.33	1929.92	945.26	1301.08	963.42	1342.25	1395.67	1435.25	2507.24	70.33	1346.83	1125.5	464.8	451.42	768.25	839.08	759.75	612.75	449.5	1993.34	2017.33	1800.83	1384.24	869.33	777.83
K00123	fdoG, fdhF, fdwA; formate dehydrogenase major subunit [EC:1.17.1.9]	16661.9	17559.1	17467.4	17550.4	19200.4	25999.3	19742.4	17205.4	14191.8	18128.5	13837.9	18335.6	15948.7	20117	23146	14132.8	15492.6	18194.2	24691.7	14085.1	23670.1	14899.8	14004	16120.8	21246.1	19963.5	1012.38	9371.96	12701	8575.17	15848.5	13297.5	15902.2	15555.5	12408.3	8825.23	23840.6	19185.9	13620.5	20835.1	10262.2	20869.2
K00124	fdoH, fdsB; formate dehydrogenase iron-sulfur subunit	4972.6	5733.36	4981.75	4748.42	6375.71	8992.93	5920.49	5163.21	4247.25	5045.57	4673.31	5286.14	4520	4945.96	6087.11	4369.29	5298.68	5717.1	7063.48	4372.82	7240.17	2842.77	3877.64	3016.67	4987.56	6016.19	276.85	2721.98	2279.5	2074.21	4294.74	3310.08	3916.17	3666.82	2898.46	1497.83	7627.58	6505.95	4685.21	6779.89	2510.49	4633.48
K00125	fdhB; formate dehydrogenase (coenzyme F420) beta subunit [EC:1.17.98.3 1.8.98.6]	9.2	14.83	9.53	3	0	10	2.5	9	4	27.67	42	52.33	21	23.67	18.67	45	66	36	41	45.67	52.67	6	56	5	19.5	34	1	16	28	42	35	10	50.67	12	0	26	79	130.2	47.2	144	32.33	135.33
K00126	fdsD; formate dehydrogenase subunit delta [EC:1.17.1.9]	309	272.83	326.34	121.67	235.33	235	219	203.5	161.67	272	274.33	236.67	336.67	302.67	477.33	199.67	298.17	307.5	518.67	124.34	631.5	186	163.51	157.67	765.84	1019.33	12.83	121.16	184.67	271.3	176.17	336	450.17	303.5	716.5	272	292.17	220.33	180.34	344	66	235.83
K00127	fdoI, fdsG; formate dehydrogenase subunit gamma	2538.34	2695.62	2331.85	2702.59	3880.45	5614.76	2969.99	2588.8	2088.83	1954.23	2041.49	2238.06	1974.62	1923.9	2254.37	1811.88	2419.62	2519.68	2945.49	1508.43	2380.52	1317.77	1783.16	1808.09	2466.8	3726.78	107.36	1740.82	2957.67	880.51	917.08	1250.25	1426.92	1406.92	1938.72	946.67	2704.85	2571.54	2162.19	1701.23	1446.16	1175.9
K00128	ALDH; aldehyde dehydrogenase (NAD+) [EC:1.2.1.3]	29771	29231.8	29721.4	34193.1	24205.3	46270.4	40791.5	35298.8	29278.4	33972.4	30062.9	32359.8	25900.5	30205.7	34456.2	30290.8	35308.8	36258.6	35148.4	25009.9	36990.9	23659.1	24682.7	33336.1	31999.3	34178	1870.47	17827.6	18079.3	16723.9	25758.7	21666	27625.5	33012	31544.9	24415.1	37381	35624.3	22535.6	34436.2	16813.9	31584.7
K00129	E1.2.1.5; aldehyde dehydrogenase (NAD(P)+) [EC:1.2.1.5]	8	6	12	0	2	6	1	3	0	5	4.5	12	4.5	0	1	3	7	10	3.5	2	1	8	13	29	2	6	1	26	2	6	98	243	37	0	0	0	3	1	1	1	0	0
K00130	betB, gbsA; betaine-aldehyde dehydrogenase [EC:1.2.1.8]	3612.03	3679.32	3251.36	5296.09	2884.23	7127.59	4048.16	3673.75	3086.87	2967.72	2320.36	2996.63	3276.99	3970.57	4293.85	2099.17	2594.96	3043.96	4015.37	2104.11	3843.56	2767.11	2264.99	3355.89	3054.08	4074.65	180.69	1809.32	2368.17	1431.46	2734.42	2933.69	2762.08	3723.75	1871.88	3134.17	2713.82	2830.37	1865.31	3005.64	1547.04	6302.45
K00131	gapN; glyceraldehyde-3-phosphate dehydrogenase (NADP+) [EC:1.2.1.9]	84	91.43	112.2	143	83.37	230.66	132.53	93.27	81.82	129.03	130.93	96.43	123.49	53.31	94.99	109.66	133.5	107.66	101.19	140.09	146.53	48.76	64.13	61.16	88.27	78.36	6.2	46	25.5	103.6	117.2	111.67	185.17	472.61	16.44	28	172.99	122.7	88.03	136.66	77.83	61.96
K00132	E1.2.1.10; acetaldehyde dehydrogenase (acetylating) [EC:1.2.1.10]	4.44	8.5	6.58	50.38	2	24.62	5.5	2.26	2.38	28.5	24	60.25	13.12	2.38	6.88	34.5	31.5	78.5	28.12	20.25	25	8.63	9.25	4.38	4.5	0.38	0.12	23	0.12	4.25	17	15	25.5	12.38	8	4.75	15.5	12.44	16.2	1.88	0.38	1.62
K00133	asd; aspartate-semialdehyde dehydrogenase [EC:1.2.1.11]	19578.2	20669.7	20403.5	23613.9	20297.2	30498.5	28274.8	24206.7	20431.1	22313.6	18020.6	21889.9	15975.7	19996.3	22466.5	18265.2	20982.9	23121	22951.1	15046.6	22971.5	17895.5	16892.9	24795.3	21619.4	21411.5	1230	11714.8	14249.6	10583.8	18017.9	14617.7	18376.2	18834.9	28904	11113.1	25183.7	23404.5	15001.1	21586.9	11401.7	22136
K00134	GAPDH, gapA; glyceraldehyde 3-phosphate dehydrogenase [EC:1.2.1.12]	23684.5	24829.4	24216.8	27715.7	24222.2	36731.8	30634.7	26247.7	21867	25996.8	22016.4	25573.4	18201.6	22879.3	26248.3	20961.6	25882.5	26009.8	26705.1	15051.6	26176.8	20190.5	18329.9	28962.6	23352.5	24410.8	1236.45	13155.3	14960.1	10668	18374.6	15537.6	18387	19587.2	20660.7	11183.5	28597	25599.6	17564.9	20244.9	12252	21193.3
K00135	gabD; succinate-semialdehyde dehydrogenase / glutarate-semialdehyde dehydrogenase [EC:1.2.1.16 1.2.1.79 1.2.1.20]	15237.3	17970.7	15140.3	19434.9	14883.9	27662.1	22128.3	19019	16010.4	19149.4	17214.7	18190.1	14394.5	16481.2	18777.2	16020.2	20248.3	19712.3	20616.2	14063.3	20305.5	14857.8	13922.2	22066.6	19418.2	22792.5	1035	10297.5	12574	8806.81	13708.6	14435.4	15939.3	16911.3	29977.8	12093	20602.5	19660.2	12848.4	19311.1	9256.19	19594.3
K00137	prr; aminobutyraldehyde dehydrogenase [EC:1.2.1.19]	34.26	15.08	28.47	4	3.12	13.67	5.33	3	2	19.14	14.33	18.12	11.83	2.4	8.8	9.22	21.57	23.1	40.91	5	82.85	25	44.43	32	26.62	48.38	2	31	21	28.91	93	243.5	42	1.5	28.3	5	32.69	26.6	11.16	29.4	11	4.08
K00138	aldB; aldehyde dehydrogenase [EC:1.2.1.-]	796.58	883.49	759.28	973.42	434.28	2904	1199.5	1032.35	848.49	1535.23	1744.71	1414.08	1051.89	787.68	948.45	1367.43	2268.96	1719.13	1694.72	667.1	1417.81	793.62	701.11	930.75	1384.37	2003.04	58.23	687	652.5	648.05	1158.42	1169.59	1104.75	988.36	1195.31	1097.17	1247.28	1161.5	830.98	746.23	712.66	1089.85
K00140	mmsA, iolA, ALDH6A1; malonate-semialdehyde dehydrogenase (acetylating) / methylmalonate-semialdehyde dehydrogenase [EC:1.2.1.18 1.2.1.27]	3924.36	4460.51	3472.49	5980.5	5570.19	7544.5	5277.15	4579.66	3821.29	3560.81	3496.66	4055.1	3542.96	3972.02	4654.31	2833.32	3814.59	4370.1	5459.35	3034.87	4895.96	3636.56	2742.93	6608.98	4100.64	4942.02	178.42	2763.65	3145.01	1942.68	4116.26	4894.2	5838.17	3337	2935.49	2339.34	3921.39	3526	2525.91	3145.73	2093.37	3321.52
K00141	xylC; benzaldehyde dehydrogenase (NAD) [EC:1.2.1.28]	94.95	158.29	88.5	31.17	9.45	193.67	63.83	48.5	48.67	35	33.12	45.33	31.17	20.17	46.99	18	39.67	27.5	22.66	83.34	38.5	17	22.84	3	31.79	59.71	3.33	118.33	90	48.88	28.17	8.5	28	24	12	26	75.42	63.83	69.79	21.67	14	72.16
K00145	argC; N-acetyl-gamma-glutamyl-phosphate reductase [EC:1.2.1.38]	14236.9	15759.6	14854.9	15247.2	13483.3	21657	18325	15684.9	13104.6	14803	12442.3	14749.9	9746.04	12891.9	14447.8	11510.1	14428.9	14497.9	14185.3	8883.81	14675.6	12507.1	11080.9	16709.7	14660.1	14195.1	712.48	7988.16	9984.79	6167.96	11893.6	9732.87	12617.4	10874.6	14986.6	6102.76	16747.3	16234.8	10057.9	12729.5	7511.08	15302.6
K00146	feaB; phenylacetaldehyde dehydrogenase [EC:1.2.1.39]	204.73	112.38	196.48	37	44.24	31	33	17	21.25	75.5	102.02	80.53	65.7	38.4	61.8	88.43	110.43	98.85	145.5	41.5	79.1	142.27	61.99	47	84.24	142.76	7.2	82	45	50.96	37	21.11	59	39	84.3	29	89.05	61.05	52.07	113.4	73	124
K00147	proA; glutamate-5-semialdehyde dehydrogenase [EC:1.2.1.41]	16163.7	17311	16997.4	17509	16057.4	23482.5	21069	18174.3	15091.7	17933.8	14687.1	18224.2	12592.1	16341.4	18442.9	14476.1	16920.9	19091.2	17275.8	11050.8	18242.7	14737.9	13389.2	20151.3	18381.5	17725	951.31	9107.66	11708.8	7931.43	14619.3	11905.2	14595.1	15875.9	19406.7	9612.42	19975.7	18658.2	11860.1	16414.4	8571.41	17754.2
K00148	fdhA; glutathione-independent formaldehyde dehydrogenase [EC:1.2.1.46]	2028.33	1248.04	2015.9	712.67	625.83	967.67	953.83	881.75	718.42	1161.25	997.72	1233.23	1138.16	862.67	1164.24	967	1186.17	1416.5	1868.16	865.68	1614.25	1060.95	1577.69	1187.5	707.92	538.58	75.73	789.83	828.5	794	1283.42	1070.25	1142.75	2051.91	2101.58	1794.5	1577.8	1065.73	1304.9	938.25	700.38	1144.33
K00150	gap2; glyceraldehyde-3-phosphate dehydrogenase (NAD(P)) [EC:1.2.1.59]	4736.66	4594.67	4783.68	4941.01	3272.59	8686.17	8262.67	7107.74	6042.92	6481.5	5575.23	6621.78	5460.28	5515.16	6791.9	6088.9	6493.05	8542.08	7498.49	5862.43	8628.51	4075.76	5137.29	5139.91	6109.26	6215.24	430.35	3516.49	3296.83	4189.67	5219	3369.66	4921.74	7689.4	6924.74	5057.99	7665.13	7647.5	4663.46	8798.48	3529.16	7130.25
K00151	hpaE, hpcC; 5-carboxymethyl-2-hydroxymuconic-semialdehyde dehydrogenase [EC:1.2.1.60]	336.09	667.09	319.84	1077.5	461.12	1140	1641.5	1433	1082.75	744.83	528.52	601.03	284.2	285.9	315.13	722.76	667.43	629.85	549.83	450	553.1	395.6	547.06	908.5	960.12	1159.38	20.2	314	386	253.58	257.5	382	173	98.5	314.3	107	1138.13	831.88	515.57	523.07	241	184.17
K00153	E1.1.1.306; S-(hydroxymethyl)mycothiol dehydrogenase [EC:1.1.1.306]	31.83	38.83	35.17	9	8	15	25	11	22	90	65.5	79	105.17	82.5	65.33	74.33	79	102	189	337	189.5	34.17	45.17	31.5	46.33	54	5	172	69	123	61	40	56	74	111.83	50	90	54	49.17	171.67	229	152
K00154	E1.2.1.68; coniferyl-aldehyde dehydrogenase [EC:1.2.1.68]	233.5	309.14	184.7	373.92	153.33	1324.33	531.66	459	396.54	332.75	449.32	361.6	174.32	332.34	409.99	283.04	490.6	325.36	238.45	341.51	419.87	208.35	202.97	221.72	802.42	1140.16	24.03	289.33	154.34	137.5	348.17	267.34	459.5	309.5	156.25	150	386.53	398.45	328.55	534.99	538.66	418.21
K00156	poxB; pyruvate dehydrogenase (quinone) [EC:1.2.5.1]	594.04	592.57	892.77	1204.66	1307.95	1286.08	907.75	816.41	635.16	1807.64	1433.36	1508.51	825.33	699.24	948.89	1636.75	1855.66	1747.22	1564.25	822	1274.77	1372.72	1151.83	1061.01	2287.12	2930.96	43.6	478.83	421.67	545.21	495	318.17	415.67	226.5	258.12	240.67	1922.99	1239.97	570.36	715.9	358	702.66
K00158	E1.2.3.3, poxL; pyruvate oxidase [EC:1.2.3.3]	370.04	434.5	651.2	1071.33	1251.67	1049.83	746.33	672.44	510.33	845.25	279.51	731.42	135.89	367	372.08	603.59	263.83	653.58	130.36	192	309.09	1039.67	947	848.83	354.17	245	24	167	282	199	301.5	116.78	269	80.44	108.11	71	1260.67	626.2	219.53	273	167.38	158.56
K00161	PDHA, pdhA; pyruvate dehydrogenase E1 component alpha subunit [EC:1.2.4.1]	14994.9	15086.4	15172.5	20882	12654.7	23584.3	22355.1	19210.9	16198.2	17712	15553.7	17136.6	14803.2	17700.9	19833.7	15798.1	18151.1	19718.1	21041.6	14435.1	20143.8	12760.2	13290.9	17864.9	17339.7	18933.7	1130.98	9500.32	9733.27	10385.5	15868.2	10996.7	13883.3	20067.1	17650.3	13615.9	19272.8	19298.4	11552.1	18041.3	10662.1	18275.4
K00162	PDHB, pdhB; pyruvate dehydrogenase E1 component beta subunit [EC:1.2.4.1]	11102	11370.1	11520.8	18879.7	11040.5	19830.1	18696.2	16095.8	13589.9	14626.5	12556.9	14200.1	11636.7	14626.6	16490.9	12954.5	14583.4	16314.8	16685.5	11184.4	16624.2	10166.4	9287.73	14501.8	12727.5	14161.3	875.49	7863.49	7806.61	8066.45	12610.9	9000.72	11026.7	14978.2	13371.7	10283.6	16222.4	14622.6	9055.56	13920.4	7861.13	14691
K00163	aceE; pyruvate dehydrogenase E1 component [EC:1.2.4.1]	4683.51	6033.94	4297.02	7136.75	8188.12	9267.34	7755.74	6525.17	5576.86	5954.65	4619.32	5572.14	3416.9	5279.23	5295.7	4519.24	5341.86	5314.8	5440.78	3797.92	4627.73	5936.93	4230.99	10684.5	6702.21	8131.12	266.36	3316.82	5377.51	2400.91	4403.41	5708.09	5906.25	3303.92	9496.3	2613.17	6728.61	5774.12	3934.86	4248.74	2752.49	3529.96
K00164	OGDH, sucA; 2-oxoglutarate dehydrogenase E1 component [EC:1.2.4.2]	8261.58	10689.1	8211.67	12990.4	11380	16476.2	12385.2	10528.9	9026.35	11246.6	9732.63	10452.5	7205.19	9412.68	10383.5	9030.91	11526.3	10644.2	10161.2	6607.59	10082.5	8546.18	6663.81	14846.1	8799.29	9796.37	533.86	5860.66	7849.17	4491.21	7982.41	8685.87	10034.4	7992.03	11873.2	4784.84	11132	10403.4	7127.88	8186.4	4796.37	11481
K00166	BCKDHA, bkdA1; 2-oxoisovalerate dehydrogenase E1 component alpha subunit [EC:1.2.4.4]	662.65	901.5	627.76	911.99	522.49	1797	1433.84	1189.68	947.66	1287.59	1034.22	1003.43	783.43	791.28	948.08	1161.54	1174.4	1071.53	1509.06	1045.51	1190.8	771.18	935.21	1038.67	771.92	795.91	49.03	375.17	516.83	457.5	766.42	572.37	978.25	557.19	318.01	175.84	1734.13	1352.35	798.21	871.07	757.21	687.77
K00167	BCKDHB, bkdA2; 2-oxoisovalerate dehydrogenase E1 component beta subunit [EC:1.2.4.4]	766.32	997.84	748.77	945.33	538.16	1824	1463.5	1206.02	961.33	1349.92	1093.56	1072.76	830.44	817.61	1004.41	1229.2	1239.74	1161.53	1607.39	1090.51	1256.13	944.85	986.88	1085.67	855.92	885.91	54.03	455.5	557.5	485.5	819.42	595.7	1007.25	600.19	371.35	203.17	1842.14	1403.69	828.22	938.07	825.21	833.77
K00169	porA; pyruvate ferredoxin oxidoreductase alpha subunit [EC:1.2.7.1]	6012.8	5833.34	6273.76	5973	7078.72	9664.5	9939.6	8664.36	7260.88	7421.5	5650.99	7417.87	6001.25	7298.16	8324.08	6527.9	6658.88	8523.25	8501.66	5747.92	8941.35	5743.33	6694.32	5888.08	7708.51	6577.41	463.82	3313.16	3645.33	4076	5056.83	3828.33	5400.58	7438.76	6210.41	4642.49	9967.27	8623.47	5667.2	8448.82	3892.66	6394.92
K00170	porB; pyruvate ferredoxin oxidoreductase beta subunit [EC:1.2.7.1]	5682.66	5492.44	5951.47	5850	5413.43	9338.5	9873.17	8654.79	7188.59	7157.5	5393.99	6873.58	5997.75	7194.16	8325.08	6287.57	6286.55	7826.25	8447.16	5794.42	9209.35	5607.33	6238.32	6179.08	7770.51	6515.41	453.82	3300.16	3692.33	4028	4998.83	3698.33	5356.58	7395.9	6193.41	4575.49	9807.9	8144.47	5067.09	8775.82	3901.66	7335.92
K00171	porD; pyruvate ferredoxin oxidoreductase delta subunit [EC:1.2.7.1]	1490.5	1718.7	1818.83	2726.5	3241.5	3105	3748	3307.38	2770	1906.67	1099.33	1842.83	1338	2491.67	2349.17	1359	1142.17	1541.5	2170.5	1354.67	1629.67	1937.5	1840.5	2053.5	2417.25	1248	136.5	854	1219.5	1215.5	1485.5	1354.5	1373.5	974.5	981	436.5	2311.5	1840.33	1117	2049.5	1053.33	1531.83
K00172	porG; pyruvate ferredoxin oxidoreductase gamma subunit [EC:1.2.7.1]	2637.14	2927.6	2794.12	3082.5	5180.29	4384.5	4684.93	4137.45	3449.29	2658.67	1870.33	2883.12	2269.5	3107.67	3546.17	2040.83	2222.5	2751.5	3742	2017.17	3592.67	2610.5	2937	2864	2919.25	1788	159.5	1167	1638.5	1491.5	1957.5	1751.5	2420.5	1534.86	1261	648.5	4517.87	3831.33	2556.11	3212	1622.33	3194.83
K00174	korA, oorA, oforA; 2-oxoglutarate/2-oxoacid ferredoxin oxidoreductase subunit alpha [EC:1.2.7.3 1.2.7.11]	17118.8	16444.5	17812.7	19846	16879.2	22996.7	22115.7	19112	16183.9	18753.1	14246.8	18270.7	15172.8	19316.8	22394.7	15081	16511.5	18748.2	22337.5	13232.7	22745.4	15000.5	15015.1	18306.4	18783.2	16990.9	960.01	7748.16	8776.19	8655.85	18433.3	11025.5	13980.2	16432.9	12678.7	9610.74	22646.1	20395.7	12884.3	19745.8	9062.29	20455.4
K00175	korB, oorB, oforB; 2-oxoglutarate/2-oxoacid ferredoxin oxidoreductase subunit beta [EC:1.2.7.3 1.2.7.11]	16748.8	16223.2	17308.3	19241.5	15910.2	22943.2	21718.7	18808	15931.4	18515.4	14178.8	17870.4	15175.3	18077.2	21280.1	15040	16500.5	18696.7	22268	13283.5	22616.7	14722	14804.1	18071.9	18283.7	16722.4	928.01	7526.66	8334.19	8472.35	16469.3	10397	13373.6	16169.4	12041.7	9360.74	22403.1	20312.7	12587.8	19652.8	9028.96	20422.6
K00176	korD, oorD; 2-oxoglutarate ferredoxin oxidoreductase subunit delta [EC:1.2.7.3]	3050.22	2769.98	3317.81	3650.51	2656.29	3254.24	3060.18	2685.84	2349.8	4146.34	2491.33	3906.45	3466.64	5026.8	6218.1	2611.5	2710.83	3042.83	6144.74	2490.24	5635.91	3516.26	2740	2971.26	3525.25	3198.26	145.74	1299.5	1498.24	1531.6	5061.5	2109	2596.5	2699.62	2291.5	1228.5	6093.5	4098.08	2491.6	3609.26	1362.92	2211.4
K00177	korC, oorC; 2-oxoglutarate ferredoxin oxidoreductase subunit gamma [EC:1.2.7.3]	3709.46	3944.36	4130.69	5254.89	4464.29	4880.86	4717.68	4182.72	3511.18	5052.84	2828.83	4708.7	3791.76	5487.18	6656.98	3284	3021.33	3789.33	6454.36	2715.49	5934.91	4575.39	3756.75	4397.64	4699.75	3598.64	175.86	1536	1802.36	1743.35	5378.5	2223	2915	2906	2387.5	1308.25	7135	4735.32	2696.6	3791.14	1474.8	2353.52
K00179	iorA; indolepyruvate ferredoxin oxidoreductase, alpha subunit [EC:1.2.7.8]	1938.88	1927.62	1901.65	1375.26	1245.5	1789.24	1428	1301.64	1036.01	2486.76	1871.58	2440.49	2143.59	3107.57	3638.77	1777.25	2246.83	2100.58	3558.24	2248.86	3805.78	1911.26	1806.5	1690.76	2395.5	1803.76	72.74	937	746.24	849.9	1816	1158	1510.51	2307.76	1005	1092	3351	2720.38	1697.65	4232.76	1374.75	2952.73
K00180	iorB; indolepyruvate ferredoxin oxidoreductase, beta subunit [EC:1.2.7.8]	1961.38	1929.62	1933.65	1380.26	1245.5	1824.24	1461	1319.64	1062.01	2609.76	1909.08	2539.99	2270.59	3315.57	3844.27	1910.75	2297.83	2230.08	3649.24	2283.86	4028.78	1942.76	1842.5	1692.76	2397.5	1813.76	72.74	927	763.24	853.4	1838	1211	1520.51	2555.76	1143	1129	3467.5	2865.88	1762.65	4312.76	1426.25	2992.73
K00183	K00183; prokaryotic molybdopterin-containing oxidoreductase family, molybdopterin binding subunit	3.66	9.66	4.97	10	15.01	7.67	30	25.99	21.67	32	75.99	36	22	15.32	47.33	36.99	115.64	66.67	53.66	30	84.01	8	11.65	27.33	33.01	80.66	1.99	19.66	46.33	9	53.66	144.33	47.33	65.65	26.66	4.99	20.65	19.64	8.67	51.32	46.33	40.67
K00184	K00184; prokaryotic molybdopterin-containing oxidoreductase family, iron-sulfur binding subunit	6360.64	8541.36	6585.91	7796.7	8089.51	8560.94	7496.27	6499.75	5348.38	9499.35	8072.47	8870.25	5680.18	7451.23	8503.8	8081.07	9547.85	9306.66	10603.7	6270.26	10142.9	5977.52	5716.4	8092.71	6968.67	7197.46	438.43	3491.5	3328.11	3806.05	8850.5	5322.84	7512.51	4345.7	3625.63	1911.08	13278.4	10160.8	7078.32	8523.03	4475.7	6930.95
K00185	K00185; prokaryotic molybdopterin-containing oxidoreductase family, membrane subunit	5912.9	7511.31	6272.69	7734.15	7269.01	8512.32	7553.44	6526.87	5380.5	9299.02	7604.3	8555.67	5725.47	7595.02	8730.59	7592.91	8976.68	8620.66	10523.2	6247.59	10274.5	6451.72	5676.98	8527.66	6771.17	6762.08	361.31	3321.67	3231.82	3297.63	8241	4857.51	6574.51	4468.82	3744.29	2080.5	12841.6	9859.37	6719.98	8437.65	4336.82	6928.33
K00186	vorA; 2-oxoisovalerate ferredoxin oxidoreductase, alpha subunit [EC:1.2.7.7]	11.5	14	12	2	2	6	5	11	9	27	24.5	17.5	24	17	23.5	25.5	29.5	20	22	0	7	8	17	12	11	21	3	6	0	28	3	8	63	11	59	0	39	35.5	42	0	9.5	8.5
K00187	vorB; 2-oxoisovalerate ferredoxin oxidoreductase, beta subunit [EC:1.2.7.7]	24.5	53	33	14	8	63	25	29	22	32	31.5	30.5	48	78	81.5	32.5	38.5	25	78	134	131	14	43	24	21	36	4	44	19	63	73	16	89	87	85	24	73	97.5	52	394	290.5	320.5
K00188	vorD; 2-oxoisovalerate ferredoxin oxidoreductase, delta subunit [EC:1.2.7.7]	14.5	41	21	13	6	23	20	17	15	21	15.5	19.5	33	63	53.5	16.5	16.5	16	69	112	116	7	19	14	17	30	0	39	0	46	41	9	50	76	40	24	57	79.5	13	359	268.5	304.5
K00189	vorG; 2-oxoisovalerate ferredoxin oxidoreductase, gamma subunit [EC:1.2.7.7]	1	1	0	0	0	27	2	3	1	12	6	3	4	1	0	6	4	5	4	0	4	0	1	0	0	0	0	0	0	0	0	0	3	10	13	0	15	14	6	0	4	0
K00192	cdhA; acetyl-CoA decarbonylase/synthase complex subunit alpha [EC:1.2.7.4]	48.5	23	50	21	65	35	585	528	484	63	38.5	45.5	25	23	20.5	32.5	38.5	23	68	38	45	29	40	29	52	155	56	98	189	418	263	280	105	18	106	24	85	40.5	54	20	22.5	51.5
K00193	cdhC; acetyl-CoA decarbonylase/synthase complex subunit beta [EC:2.3.1.-]	48.5	23	50	21	65	35	585	528	484	63	38.5	45.5	25	23	20.5	32.5	38.5	23	68	38	45	29	40	29	52	155	56	98	189	418	263	280	105	18	106	24	85	40.5	54	20	22.5	51.5
K00194	cdhD, acsD; acetyl-CoA decarbonylase/synthase complex subunit delta [EC:2.1.1.245]	539	349.7	664.83	859.75	808.5	474.5	923.25	822.63	736.25	554.17	370.75	607.33	425	1508.67	1353.67	288.5	332	332.5	889	427.67	642.17	518.75	452.5	381.5	727.5	643	73	372.5	377.5	591.5	612	750.5	405.17	559	364.5	221	661.5	547	504	737.5	453.33	441.33
K00195	cdhB; acetyl-CoA decarbonylase/synthase complex subunit epsilon	48.5	23	50	21	65	35	585	528	484	63	38.5	45.5	25	23	20.5	32.5	38.5	23	68	38	45	29	40	29	52	155	56	98	189	418	263	280	105	18	106	24	85	40.5	54	20	22.5	51.5
K00196	cooF; anaerobic carbon-monoxide dehydrogenase iron sulfur subunit	64	53.45	76.83	279.5	19.5	202	129	101.88	105	127.17	107.83	143.83	120	200.67	209.67	91.5	126.33	77.83	214.5	72.67	332.34	103.5	132.5	34	45.5	57	4	53.5	74	152.5	588	206.5	106.67	363	184	144	400	523	179	304	119.83	213.83
K00197	cdhE, acsC; acetyl-CoA decarbonylase/synthase complex subunit gamma [EC:2.1.1.245]	594	412.2	706.83	883.25	832.5	560	965.25	858.13	772.25	605.17	431.75	654.83	448.8	1539.07	1386.17	330	406	393	958	451.47	668.47	541.75	481.5	421	746	670	74	414	420	623.7	662.5	775	430.17	586	379	242	689	597	527	798	466.83	778.33
K00198	cooS, acsA; anaerobic carbon-monoxide dehydrogenase catalytic subunit [EC:1.2.7.4]	1493.4	1236.22	1689.39	1810.25	1669	1064	835.25	733.27	629.25	1667.01	993.75	1732.49	1180.6	3123.31	3369.01	769	942.5	898	2311	838.11	2417.61	1691.75	1281.5	1334.5	1521.5	1129.5	41.5	712.5	549.5	516.4	1471.5	1195	762.01	1153	513	489.5	2819.5	1957.9	1367.9	1920.5	883.49	1139.49
K00200	fwdA, fmdA; formylmethanofuran dehydrogenase subunit A [EC:1.2.7.12]	868.83	865.33	841	283.66	1872.5	686.83	888.83	750.33	704	704.84	690.99	913.17	450.17	488.83	536.5	653.33	889.83	1083.83	852	497.83	739.34	862.16	880.17	411.17	733.66	937.84	72.83	268.5	320	576.3	686.5	627.17	581	232.5	233.83	192.5	758.99	1036.83	1011.33	793.5	410	766.67
K00201	fwdB, fmdB; formylmethanofuran dehydrogenase subunit B [EC:1.2.7.12]	776.33	819.33	717	236.66	1862.5	648.83	853.83	734.33	688	649.84	638.49	862.67	394.17	367.83	423	598.83	834.33	1036.83	776	452.83	632.34	702.16	724.17	313.17	660.66	886.84	68.83	231.5	291	551.3	608.5	603.17	538	139.5	162.83	114.5	614.99	856.33	916.33	686.5	337.5	616.17
K00202	fwdC, fmdC; formylmethanofuran dehydrogenase subunit C [EC:1.2.7.12]	859.83	855.33	833	256.66	1815.5	650.83	311.83	243.33	226	693.84	666.99	901.17	425.17	465.83	503.5	650.33	866.83	1076.33	790	477.83	677.34	856.16	874.17	393.17	719.66	817.84	16.83	209.5	130	226.3	514.5	382.17	508	177.5	218.83	186.5	721.99	995.83	976.33	735.5	394	670.17
K00203	fwdD, fmdD; formylmethanofuran dehydrogenase subunit D [EC:1.2.7.12]	49	23	50	21	65	35	585	528	484	64	39	46	30	23	22	33	39	24	82	38	45	30	40	29	55	155	56	98	189	418	263	280	106	18	107	24	86	41	54	20	24	55
K00205	fwdF, fmdF; 4Fe-4S ferredoxin	45.5	19	47	8	8	11	21	29	15	57	34.5	41.5	24	17	19.5	32.5	33.5	22.5	67	38	38	26	36	20	48	56	0	63	8	87	112	35	46	9	98	24	81	34.5	28	20	22.5	46
K00207	DPYD; dihydropyrimidine dehydrogenase (NADP+) [EC:1.3.1.2]	0	0	0	0	0	0	0	0	0	1	0	0	0	1	0	0	0	0	5	14	2	0	0	0	0	0	0	0	0	0	0	0	0	4	0	0	1	0	0	6	0	5
K00208	fabI; enoyl-[acyl-carrier protein] reductase I [EC:1.3.1.9 1.3.1.10]	13809.1	15455.9	13879.2	19667.3	16414.4	22438	19629.2	16716.3	13926.3	15313.4	13834.1	14929	9977.74	12815	14688.9	12541.5	16302	15352.4	13916.9	8648.01	15082.9	11462.4	9867.72	20329.8	13289.8	16015	715.36	8360.99	10183.7	6025.68	12809.5	11215.3	12456.3	11361.3	15650.6	6303	16352.4	15429.6	9918.55	12292.7	6651.87	14186.5
K00209	fabV, ter; enoyl-[acyl-carrier protein] reductase / trans-2-enoyl-CoA reductase (NAD+) [EC:1.3.1.9 1.3.1.44]	148.3	127.24	156.56	216.16	75.95	442.17	504.93	428.98	413.61	207.34	255.14	192.4	491.9	196.68	301.08	184.79	324.41	293.53	982.62	378.34	658.8	188.68	181.38	147.43	175.76	159.91	18.03	215	114	163	287.58	163.92	208.58	173.11	167.08	195.84	211.29	239.27	191.03	287.75	350.5	221.21
K00210	E1.3.1.12; prephenate dehydrogenase [EC:1.3.1.12]	105	63.83	129.66	93.33	23	96	145.67	116	91	98.67	87.66	96.67	50.66	129.34	90.67	122.67	116.33	114	26.33	24.33	35.67	161.33	182.33	103.33	56	26	4	14.17	29.33	31.13	51	50.67	54	50	366.99	164.67	235.82	207.33	151.66	33	45	105
K00211	TYR1; prephenate dehydrogenase (NADP+) [EC:1.3.1.13]	0	0	0	0	0	0	0	0	0	0	0	0	0	0	0	0	0	0	0	0	2	0	0	0	0	0	0	0	0	4	0	0	0	0	0	0	1	0	0	0	0	0
K00213	DHCR7; 7-dehydrocholesterol reductase [EC:1.3.1.21]	5	5	10	7	0	10	2	1	0	16	20	9	5	4	4	16	33	12	5	10	9	0	43	15	5	0	0	0	0	0	0	3	59	15	4	2	41	102	45	3	20	4
K00214	BLVRA, bvdR; biliverdin reductase [EC:1.3.1.24]	234.17	203	279.67	549.5	132.83	383	401.5	333.5	266.5	148.67	137.67	726.5	282	213	355.5	137.83	124.33	1156.5	379.5	285	451.67	169.5	151	105	276.83	434.67	3.5	110	111	92.5	142.5	72.83	66.66	556.83	221	255.5	285.83	357.33	73	320	202	320.33
K00215	dapB; 4-hydroxy-tetrahydrodipicolinate reductase [EC:1.17.1.8]	18653.6	19808.4	19289.7	22423.8	18362.9	30378.6	27441	23475	19824.1	20903.8	17414.7	20526.9	14865.1	18574.7	20920	17127.5	20197	21667.1	21146	14427.3	21758.3	16422.5	15632.8	23014.3	19913.4	19124.9	1098.92	10960.3	12951.2	9718.51	16867.4	13539.7	17320	17971.4	21240.5	10795.3	22970.7	22212.3	14009.1	20517.3	11192.3	21143.7
K00216	entA; 2,3-dihydro-2,3-dihydroxybenzoate dehydrogenase [EC:1.3.1.28]	4.38	5.91	7.47	28	48.12	44.67	35.33	37	33.24	46.14	11.95	36.12	7.33	12.4	37.8	2.72	5.71	12.1	7.41	13.33	38.85	17	2.93	12.76	13.62	12.38	2	7	76	33.91	10	92.61	25	101	465.13	158	15.61	9.1	6.78	0.4	22.38	8.08
K00217	E1.3.1.32; maleylacetate reductase [EC:1.3.1.32]	45.83	31.5	24.17	27.17	5.33	80.67	54.5	46.5	36.67	6	5	5	3.34	2.17	7.66	1.67	3.34	2.5	7.5	17.34	15.5	35	11.84	18	560.17	831.33	4.33	35.33	11	15.5	3.17	7	2	0	5	0	6.5	14.83	11.34	3	8	5.83
K00218	por; protochlorophyllide reductase [EC:1.3.1.33]	234.17	203	279.67	549.5	132.83	383	401.5	333.5	266.5	156.67	138.67	729.5	284	213	355.5	138.83	129.33	1157.5	381.5	285	451.67	169.5	151	105	276.83	442.17	3.5	110	111	92.5	185	72.83	66.66	556.83	221	255.5	287	357.33	74	320	202	323.33
K00219	fadH; 2,4-dienoyl-CoA reductase (NADPH2) [EC:1.3.1.34]	2182.76	2403.34	2104.24	5499.08	4649.45	6358.83	3622.82	3187.63	2570.62	1873.89	2028.53	2053.66	1952.67	3234.91	3338.71	1593.42	2199.97	1777.87	2686.24	1331.02	2196.26	1207.47	1378.09	4401.89	1467.96	1843.95	95.43	1535.66	1251.51	791.41	1962.58	2300.42	1443.59	1488.58	1037.13	667.17	2047.1	1823.45	1684.44	1782.47	1570.32	1254.74
K00220	tyrC; cyclohexadieny/prephenate dehydrogenase [EC:1.3.1.43 1.3.1.12]	1520.83	1385.42	1420.17	1966.5	1929	2646	2272.5	1990.5	1596.58	1168	1288.5	1190.83	1094.5	1369.5	1672.33	1187.5	1450.16	1321.25	1513.67	738	1609.5	710.17	727.16	1282.67	1458.33	2357.83	68.5	1394.5	1175	569.8	479	794	893.33	925.5	1244	682	1714.25	1304.75	956.58	1385	587.5	636.5
K00221	E4.99.1.2; alkylmercury lyase [EC:4.99.1.2]	5.75	3.83	2.25	3.34	0	5.5	9.25	5.58	6.66	12.5	6.5	4	5.08	6.67	4.08	7.75	17.75	12	6.58	0.67	8.33	5.08	9.33	5.33	2.5	4.75	0	0	5	3.17	6	20	14	0.67	68.33	0	15.33	14.75	10.5	0	0	8
K00222	TM7SF2, ERG24; Delta14-sterol reductase [EC:1.3.1.70]	1	0	1	0	0	0	0	0	0	1	1	0	0	1	0	0	2	0	5	16	2	4	0	0	0	0	0	8	0	0	2	0	0	4	4	2	1	0	0	7	7	5
K00223	ERG4; Delta24(24(1))-sterol reductase [EC:1.3.1.71]	0	1	1	3	0	9	0	0	0	3	1	0	5	3	0	5	7	1	0	0	0	0	0	0	0	0	0	0	0	0	0	0	0	0	0	0	1	0	0	0	0	65
K00226	pyrD; dihydroorotate dehydrogenase (fumarate) [EC:1.3.98.1]	2439.34	2281.83	2595.67	908.83	2398.2	2676.33	1781.53	1504.83	1367.83	3268.46	2484.46	3357.73	1786.83	2100.7	2549.42	2724.58	3199.66	3709.41	2554	1422.84	2472.54	2802.5	2215.5	2355.33	2498.1	2232.7	77.5	595	846.5	685.6	3040.7	770.5	2028.5	1722.83	1944	1172.5	2490	2781.33	2179.66	2356.66	1036.66	2488.06
K00227	SC5DL, ERG3; Delta7-sterol 5-desaturase [EC:1.14.19.20]	2	1	1	0	0	0	0	0	0	2	1	0	0	2	0	0	2	0	10	30	6	4	1	0	0	0	0	8	0	4	2.5	0	0	8	4	2	3	0	0	13	7	10
K00228	CPOX, hemF; coproporphyrinogen III oxidase [EC:1.3.3.3]	5341.1	6792.94	5431.93	9769.09	9234.95	12692.4	10558	8817.25	7600.69	7800.15	7264.15	7712.47	4765.14	6204.81	6875.92	6405.6	8586.22	8307.73	7122.86	4709.76	6605.83	5911.85	4313.31	11346	6741.63	8152.2	339.03	4745.99	6166.34	3206.41	5353.41	5945.75	6776.58	5196.58	10912.6	2859.67	8166.68	7590.9	5130.28	5142.63	3603.49	4743.45
K00230	hemG; menaquinone-dependent protoporphyrinogen oxidase [EC:1.3.5.3]	1338.43	1410.34	1495.31	1130.67	923.79	2011.34	1540.5	1239.67	1124.95	1570.48	1505.17	1345.79	697.34	593	940.8	1449.55	1653.21	1456.27	948.75	787.5	1273.52	1192.5	809.43	1451.88	1341.29	1069.88	55.5	663.33	499.5	621.91	939.33	705.67	798.67	982.17	586.47	544.5	1426.04	1405.6	984.44	992.07	372.83	1055.58
K00231	PPOX, hemY; protoporphyrinogen/coproporphyrinogen III oxidase [EC:1.3.3.4 1.3.3.15]	2802.65	3945.64	2610.75	2190.32	1670.16	4356.08	3304.67	2770.21	2408.41	4418.1	3518.65	3584.41	2310.6	2710.21	3203.33	3762.07	4036.14	3642.33	3774.64	3686.83	4653.6	3584.17	2666.16	4424.17	3904.32	4658.51	152.83	1432.67	1555.83	1313.5	4328	2024.28	3293.33	2527.38	1960.87	1946.67	5345.28	4917.74	2800.1	4906.5	1836.38	4170.62
K00232	E1.3.3.6, ACOX1, ACOX3; acyl-CoA oxidase [EC:1.3.3.6]	268.83	327	256.67	601.33	167.5	1176	854.5	764	669	615.16	697	655.5	350.5	479.67	415.16	447.16	862.5	681.5	293	170.67	268	554.67	345.67	730	630.83	868	31.5	435	380	376.5	694.5	614	686	291.5	239.16	886	575.16	1014.83	365.17	298.17	635.5	826
K00239	sdhA, frdA; succinate dehydrogenase / fumarate reductase, flavoprotein subunit [EC:1.3.5.1 1.3.5.4]	18322.6	19149.2	18852.3	22629.6	17120.5	28312.5	26472.8	22701	19000.7	21383.4	17801	20534.6	15309.6	18729.2	21030.5	17573.1	20799.6	21894.7	22549.2	15164.6	22119	16537.6	15133.9	22959	20668.6	20198.1	1093.5	10972.1	13339.7	10017.4	17573.1	13761.5	17904	17617.3	21838.5	10737	22345.9	21486.8	13788	21439	10871.5	22091.1
K00240	sdhB, frdB; succinate dehydrogenase / fumarate reductase, iron-sulfur subunit [EC:1.3.5.1 1.3.5.4]	15625.3	17628.3	16045.3	20254.4	15919	26631	22117.7	18961.3	16004.5	19715.6	16495.4	18930.8	14276.1	17972.9	19911.9	16537.5	19454.5	20719.2	20805.3	14235.4	20672.8	15620.8	13863.1	21003.2	19178.9	19422.5	995.18	9850.99	11838.8	8943.91	16208.2	12887.7	16804.7	16712.3	20483.8	10137	21191.2	20232.4	12806.2	19792	10287.7	20727.4
K00241	sdhC, frdC; succinate dehydrogenase / fumarate reductase, cytochrome b subunit	13990.8	15919.9	14474.8	16958.1	14712	23846	20158.7	17169.8	14494.5	18369.2	15441.9	17576.7	12820.3	16024.2	18000	15500.9	18169.2	19150.1	19394.8	13037.9	18886.8	14374.8	12849.6	19942.7	16902.4	18252.5	934.68	9227.99	10877.8	8351.91	15100.7	11805.2	15655.7	14897.8	19813.8	9098	19780.9	18475.4	12117.2	18289	9172.7	15946.4
K00242	sdhD, frdD; succinate dehydrogenase / fumarate reductase, membrane anchor subunit	8020.67	8727.68	7927.65	11116.9	10718	16657.6	14320.9	12170.6	10347.6	10903.3	8905.31	10325	7848.9	9750.39	10731.8	9260.82	10380.8	11299.9	11075	7920.76	10825.9	8774.6	8075.63	13893.7	10694.1	11626.9	588.35	5984.65	7903.17	5259.71	7488.24	7528.25	9417.83	9377.82	15207	6086.66	12894.8	11159.2	7498.87	10494.7	5572.32	7621.88
K00243	K00243; uncharacterized protein	1655.46	1942.61	2105.43	2595.46	2270.82	4594.62	3381.46	2795.51	2443.11	3568.71	2882.43	3095.54	1863.98	1983.54	2300.62	2972.71	3689.16	3405.28	2603.34	1296.43	2153.17	2551.31	2114.21	2554.59	1528.61	1535.91	88.65	1370.5	1064.12	927.52	1165.12	614.37	1205.75	2269.1	1074.02	863.92	2687.37	2710.43	1641.64	1824.46	928.42	1273.45
K00244	frdA; fumarate reductase flavoprotein subunit [EC:1.3.5.4]	487.39	515.47	360.27	702.41	221.07	903.11	796	678.57	565.19	524.15	453.04	567.62	766.53	320.81	864.53	486.22	472.88	589.77	1180.02	255.85	1567.18	256.32	238.21	262.45	314.92	365.32	11.26	189.32	162.27	143.54	696.17	274.67	232.18	405.07	306.47	56.75	2011.95	1219.21	489.57	608.8	374.89	503.67
K00245	frdB; fumarate reductase iron-sulfur subunit [EC:1.3.5.4]	328.93	339.67	276.48	176.34	153.62	317.34	399	319.67	274.62	292.15	331.84	321.29	593.59	207.57	756.3	216.72	356.88	286.27	995.17	151.09	1501.69	128.5	203.94	129.55	206.13	208.21	11.33	124.99	132.67	126.91	695	286.17	218.01	291.17	241.47	41	1738.78	1102.43	471.5	429.4	88.16	351.74
K00246	frdC; fumarate reductase subunit C	329.93	341.17	276.48	176.34	153.62	317.34	399	319.67	274.62	292.15	331.84	320.79	593.59	207.57	756.3	216.72	356.88	286.27	993.17	151.09	1496.69	128.5	204.94	129.55	205.63	205.21	11.33	124.99	132.67	126.41	692.5	286.17	216.01	291.17	241.47	41	1738.78	1102.43	472.5	429.4	88.16	351.74
K00247	frdD; fumarate reductase subunit D	95.93	72.84	99.15	51.84	32.12	141.84	133.5	100.17	82.12	52.48	117.84	86.96	181.09	43.9	164.13	56.39	129.05	100.27	237.17	32.42	293.02	23	26.44	25.55	21.63	11.71	0.33	29.49	21.67	10.41	46.5	65.67	84.34	3.17	194.97	5	31.28	80.93	27	165.4	1.83	92.91
K00248	ACADS, bcd; butyryl-CoA dehydrogenase [EC:1.3.8.1]	2010.79	2713.24	1923.26	3599.95	1324.95	5733.37	3899.61	3444.15	2832.24	2055.09	1868.47	1807.14	1752.29	1413.49	1773.71	1974.93	2114.4	2070.08	3217.62	2474.84	2936.76	1321.81	1495.95	1899.3	2298.33	2814.04	122.32	1214.34	979.78	1204.55	1462	889.84	1631.5	2075.24	1194.15	853.09	2631.05	2661.85	1678.51	2127.79	1579.7	2239.12
K00249	ACADM, acd; acyl-CoA dehydrogenase [EC:1.3.8.7]	20424.2	19486.6	19251	29231.8	15441.4	35412.7	28814.5	25383.4	21246.8	19138.2	17726	19093.7	18288.7	21584.8	23556.3	16471.4	20324.6	20871.4	23321.4	16404.2	22266.2	14910.7	15849.9	17251.4	28916	31894.3	1201.01	10306.1	12610.3	10139.3	16409.5	15152.2	17418.2	20728	17594.9	13966.2	22305.8	20348.9	13068.9	26076.2	10629	27266.6
K00252	GCDH, gcdH; glutaryl-CoA dehydrogenase [EC:1.3.8.6]	7138.73	7921.57	6852.01	10765.3	7823.01	14106.1	12102.3	10444.1	8583.91	9846.82	9650.89	8910.52	7066.09	7681.01	8778.72	9160.22	11700.4	10126.3	10318.8	7458.44	9999.42	5806.84	6948.03	11229.2	8339.26	9992.89	510.18	5786.49	5195	5073.5	7018.92	5742.92	6951.42	8319.24	7565.31	5624.66	10948.3	9993.91	6686.54	8538.14	5158.32	6516.51
K00253	IVD, ivd; isovaleryl-CoA dehydrogenase [EC:1.3.8.4]	2148.92	2444.93	1913.02	4676.41	4244.66	5520.08	3759.08	3316.66	2744.08	2050.17	2297.14	2145.68	2024.72	2464.34	2971.41	1998.88	2583.5	2310.36	3064.36	1638.26	2901.38	1183.93	1415.72	4427.59	1809.51	2649.74	106.03	1370.33	1386.17	945.5	2129.08	2659.42	2045.92	1657.75	1516.16	883.84	2655.92	2161.28	1642.78	1891.66	1259.99	1385.04
K00254	DHODH, pyrD; dihydroorotate dehydrogenase [EC:1.3.5.2]	8594.75	10056.8	8760.31	13150.2	10579.2	18865.2	16164	13761.4	11613.4	12349.6	10895.1	12034.7	8668.44	9942.07	11413.9	10890.2	12767.6	13934.1	12430.6	8952.51	12608.1	8548.68	7982.63	12436	10769.5	11965.6	675.35	6272.32	7822	6076.21	8901.74	8088.75	10480.2	10790.8	8612.31	6497.33	13070.9	12242	7652.14	10792	6307.32	8725.77
K00255	ACADL; long-chain-acyl-CoA dehydrogenase [EC:1.3.8.8]	152	210	91.5	783	190	834	1194	1047	810	152.5	288.5	180.5	405.5	462	528	169.5	391.5	211	361	149	457	52	74.5	213	131	133	9	122	160	88	78	62	97	378	414	189	158.5	224.5	155	177	27.5	125.5
K00256	E1.3.99.16; isoquinoline 1-oxidoreductase [EC:1.3.99.16]	39	41.5	43	259	11	1006	165	142	114	53.5	78	67.83	34.66	25.33	63	69.83	127	117.83	70	52.67	114.33	55	54	16	10	26.33	0	51	42	18	18	0	13	68	12	73	118.67	211	92.33	72.66	174.33	30
K00257	mbtN, fadE14; acyl-ACP dehydrogenase [EC:1.3.99.-]	16801.9	18418.4	16284.8	22872.7	19012.1	31645.2	23518.2	20708.5	16984.9	19566.6	19003.7	19675.9	14705.8	21205.8	22428.5	16573.3	22477.8	20007.1	20173.3	13098.2	19504.2	14440.6	13390.2	22229.3	27640.5	32899.4	1196.05	10094.3	11976.5	9751.16	14999.4	16961.8	18252.5	16245.1	14027.8	12797.3	20014.1	19038.5	13278.7	18000.2	10769.3	19108.7
K00259	ald; alanine dehydrogenase [EC:1.4.1.1]	13779.4	15021.2	14377.1	17885.2	15205.6	20649.7	19153.5	16339.6	13695.4	15623.8	12803.7	15109.5	9974.21	13049.6	14931.4	12104.3	14788.8	14891.4	15042.6	8937.9	14861	12153.7	10620.6	19319.5	13323.9	12583.7	708.66	7988	8400.5	6162.13	11323.8	10822.7	12108.1	10881.5	14296.4	6130.34	16048.7	15290.4	9655.74	12377.1	6235.37	15586.2
K00260	gudB, rocG; glutamate dehydrogenase [EC:1.4.1.2]	126.4	103.87	114.63	258.38	58.5	266.62	275	236.1	169.71	251.67	167.33	168.24	75.39	111.15	152.54	216.33	182.16	200.5	114.84	187.75	192.67	169.97	130.16	80.38	140.5	91.38	15.12	102	84.12	62.75	87	74.22	199.5	277.76	109.72	62.25	354.68	173.66	155	131.38	77.14	166.74
K00261	GLUD1_2, gdhA; glutamate dehydrogenase (NAD(P)+) [EC:1.4.1.3]	14463.6	15144.4	14508.3	16533.6	12964.8	26356.6	23488.5	20084	16797.9	18004.7	15774.8	17435.7	15298.4	15835.5	18132.1	16208	18552.2	20230	21089.7	16472.9	21002.5	13816	15105.9	17506.3	19529.2	20581.5	1166.95	9789.65	10277.3	11065.9	15772	9234	14438.9	19910.1	17706.5	12527.8	22444.5	21654.1	13515.7	22623	11531.3	17477
K00262	E1.4.1.4, gdhA; glutamate dehydrogenase (NADP+) [EC:1.4.1.4]	3476.34	3920.45	3893.51	7610.67	5713.32	9919.75	6738.36	5738.4	4892.16	6362.11	5027.36	6436.58	3952.63	5676.61	6127.2	5203.29	6265.32	7116.59	5386.39	2849.6	5177.86	4512.77	3731.32	7002.16	4091.39	4359.08	182.03	2451.66	1976.5	2036.18	3505.45	2929.42	2909.59	5014.36	2257.49	2641	5792.27	5072.63	3296.53	4699.14	2558.65	3770.49
K00263	E1.4.1.9; leucine dehydrogenase [EC:1.4.1.9]	1042.55	1383.57	1118.72	4864	2695.12	4330.83	4612.35	3831.42	3318.36	2845.42	2936.06	2371.05	1429.35	1557.61	2019.08	2740.54	3618.66	2984.78	2450.39	1458.09	2333.71	1165.18	963.12	3601.5	1039.5	1013.58	71.7	1185.67	897	921.17	1721	1513.95	1479.5	1417.8	1439.68	689.67	2232.85	2080.86	1399.89	1530.66	1072.04	1497.11
K00264	GLT1; glutamate synthase (NADPH/NADH) [EC:1.4.1.13 1.4.1.14]	4	1.5	4	0	0	2.5	0	0	0	1.5	1	0	2	3.5	1.5	1.5	0	0	0.5	3	2	1	4.5	0	2.5	2.5	0	0	0	4	0.5	0	4	0	0	1	2	0	1.5	0.5	0	0
K00265	gltB; glutamate synthase (NADPH/NADH) large chain [EC:1.4.1.13 1.4.1.14]	11066.7	11817.8	11224.3	11079.6	10374	15702	11598.7	10092.1	8493.07	13084.6	10256.1	12650.3	9291.31	12480	13657	10311.1	11847.9	13042.1	13068.4	8200.26	12465.9	11448.4	9589.38	13010.1	13403.1	14715.7	755.3	6961.99	9080.12	6267.29	9662.41	9194.03	11656.8	12055.3	16002.9	8025.58	15011.5	12640.1	9072.86	10730.6	6435.08	11521.7
K00266	gltD; glutamate synthase (NADPH/NADH) small chain [EC:1.4.1.13 1.4.1.14]	16004	17254.1	16554.2	17893.6	15330	24193.3	21619.9	18613.8	15501.9	16619.2	13932.6	16517.1	11778	15128	17190.2	13139.2	16252.8	16460.8	16568.8	10236.1	17504.3	13541.7	12136.2	17983.6	15463.5	15767	855.01	8848.16	11361.1	7342.16	14028.6	11402.4	14218.8	13196.1	16169.6	7027.76	18932.8	17335.5	11135.4	14787.9	7983.58	16515.6
K00270	pdh; phenylalanine dehydrogenase [EC:1.4.1.20]	39	29.5	29	2.5	6.5	20	2	6	1.83	46.33	59.5	36.83	15.83	13	21	40.5	58	51	10.5	19	42.67	22.5	32	13.5	35.5	29.5	0	17	8	7	22.5	0	21	12.5	22	8	122	37	70.5	27	0	9
K00271	vdh; valine dehydrogenase (NAD+) [EC:1.4.1.23]	169	218	130	80	64	101	202	196	186	305	218	389	221	453	327	187	259	393	198	304	182	274	140	500	407	609	18	80	240	118	480	513	406	217	101	793	100.17	136	104	248	124	548
K00273	DAO, aao; D-amino-acid oxidase [EC:1.4.3.3]	21.5	22	30.5	6	4.5	8	13.5	10.5	10	17.5	10.5	17.5	21.5	23	41	9	18	23	34.5	35.5	54	19	11	3.5	11	16	0	12	29	15	25	11	15.5	14	26	16.5	3.25	8.5	6.5	65	14	15
K00274	MAO, aofH; monoamine oxidase [EC:1.4.3.4]	1447.58	2068.74	1383.74	1993.99	1361.33	2523.66	2512.42	2117.91	1781.91	2963.5	3016.16	2580.4	1579.56	2060.28	2455.76	2805.49	3710.4	2960.99	2229.58	1392.17	2584.01	1370.58	1242.33	2551.67	1934.67	2369.58	96.5	1041	1067	1057.13	2265	2263.78	1649.84	1873.5	1041.66	1571.67	2629.16	2452.66	1639.9	1850.83	809.71	1946.83
K00275	pdxH, PNPO; pyridoxamine 5'-phosphate oxidase [EC:1.4.3.5]	6484.34	8898.38	6360.9	12712.9	10686.8	15687	12274.4	10374	8897.52	9704.16	8890.02	9433.79	5669.71	7479.91	8280.12	8087.83	10430	10211.2	8277.11	5635.18	8171.99	6985.04	5338.91	13083.9	7277.54	8876.04	419.26	4544.16	6045.67	3806.71	7456.91	7843.09	8842.08	6217.92	4031.29	3866.84	9890.56	9141.35	5729	5771.65	4199.49	5511.29
K00276	AOC3, AOC2, tynA; primary-amine oxidase [EC:1.4.3.21]	37.26	31.41	69.14	146	109.24	197	59	64	55	57.83	29.62	51.5	334.5	379.4	416.13	54.93	34.1	66.6	459.5	178	171.6	75	26.43	396	627.24	894.76	11	36	62	81.96	18	25	37	520.33	108.3	195	111.98	51.43	36.23	142.57	490	73
K00278	nadB; L-aspartate oxidase [EC:1.4.3.16]	14640.6	16421.7	15250	19975.7	15224.5	23783.3	21171.3	18192.6	15269.8	16549.2	12873	16263.6	11734.8	15217.3	17341.7	12804.9	14529.7	15898.3	16649.9	11300.2	17557.2	14670.1	12814.1	20755.3	17992.3	17578.8	961.3	8495.49	11557.5	8560.66	15317.2	12479	15611.3	14245	18831.8	8731.58	18462.9	17336	10823.7	15446.9	9023.41	17316.7
K00280	LOXL2_3_4; lysyl oxidase-like protein 2/3/4 [EC:1.4.3.-]	0	0	0.67	0	0	0	0	0	0	0	0	0	0	0	0	0	0	0	0	0	0	0	0	0	0	0	0	0	0	0	0	0	0	0	0	0	0	0	0	0	0	0
K00281	GLDC, gcvP; glycine dehydrogenase [EC:1.4.4.2]	3713.26	4356.95	3445.47	4371.09	3274.95	7139.17	5201.49	4451.75	3751.19	4636.48	4933.55	4869.17	3635.1	3685.58	4486.45	4287.16	6024.95	5978.3	5200.94	2971.84	5182.9	2407.62	2267.61	3779.47	3488.96	5109.87	185.23	2863.99	2219.34	2058.21	2945.41	2581.75	2875.58	3890.42	2754.63	2780.67	4446.09	4789.58	2915.07	3115.24	2152.66	3304.62
K00282	gcvPA; glycine dehydrogenase subunit 1 [EC:1.4.4.2]	10596.1	12373.7	11281.1	16059.7	13466.3	17810	17504.3	15041.8	12764.9	14578.5	10647	13638.1	10514.4	13819.2	15245.5	12004.1	12196.5	14516.4	14810.1	10161.3	14852.8	12204.9	11061.4	17027.1	13146.9	12178.1	822.27	6739.83	9461.28	6526.45	11765.8	9658.78	12987.6	11838.2	16413.5	6886.91	17659.1	14672.6	9369.97	14233	7189.92	14832.3
K00283	gcvPB; glycine dehydrogenase subunit 2 [EC:1.4.4.2]	10625.1	12441.7	11315.1	16097.7	13855.3	18079	17534.3	15055.8	12775.9	14901.5	10727	13898.1	10519.4	14025.2	15389.5	12066.1	12285.5	14557.4	14798.6	10140.3	14838.8	12310.9	11134.4	17361.1	13426.9	12228.1	821.27	6759.83	9489.28	6524.45	12311.8	9927.78	13064.6	11867.2	16459.5	6900.91	17707.1	14685.6	9409.97	14234	7203.42	14862.8
K00284	E1.4.7.1; glutamate synthase (ferredoxin) [EC:1.4.7.1]	1304.2	2003.19	1269.12	4681.58	1780.16	4879.33	4152.58	3513.9	3000.41	2988.51	2848.08	3041.5	2447.55	2894.17	3361.99	2808.15	3531.65	4095.83	2676.77	2032.5	3610.51	1204.74	1277.83	2326	1474.82	1877.68	117.83	1252	1246	1080.17	1510	1280.33	1334.99	4001.44	1349.77	1713	2963.76	3133.77	1537.03	2634.83	1175	6155.06
K00285	dadA; D-amino-acid dehydrogenase [EC:1.4.5.1]	3735.4	4248.99	3592.96	3656.75	3983.73	9042.48	4609.82	3948.44	3239.7	3897.22	3392.22	3797.97	3246.63	3925.51	4575.94	3071.13	3707.36	3452.33	4746.75	3292.11	4701.39	4481.62	3143.98	3977.92	7589.42	9394.4	193.22	2942.97	4510.36	1611.62	3069.01	4154.62	5185.68	3309.94	3019.99	1716.5	6941.64	4684.65	3160.23	4068.71	2067.08	2200.18
K00286	proC; pyrroline-5-carboxylate reductase [EC:1.5.1.2]	17281.6	18964.4	18194.7	22201.2	17473.1	28187.8	26350.5	22503.6	18919.7	21265.5	17737.6	20352.5	14763.1	18366.7	20982.9	17442.3	20708.6	21364	20792.6	13071	21516	16155.7	14635.1	22457.2	20122.6	19618.6	1035.31	10302.7	12602.3	9164.43	16700.3	13318.6	16519.6	16991.1	21008.2	9975.42	22522.8	21828.9	13206.8	19033.1	9745.17	20975.9
K00287	DHFR, folA; dihydrofolate reductase [EC:1.5.1.3]	9374.22	9322.06	9597.99	10934	10165.2	15427.3	12760.2	10672.2	9329.74	12893.9	10410.9	12065.2	6991.12	9757.38	10647.8	10915.8	12622.1	13751	9827.62	6375.18	9622.3	8851.52	7855.04	13369	8007.34	8329.14	490.34	6330.31	7093.5	4322.81	7212.6	8320.36	9284.67	10972.9	14848.3	6867.65	12293.4	10716.4	7667.82	7503.2	4311.36	6202.84
K00288	MTHFD; methylenetetrahydrofolate dehydrogenase (NADP+) / methenyltetrahydrofolate cyclohydrolase / formyltetrahydrofolate synthetase [EC:1.5.1.5 3.5.4.9 6.3.4.3]	402	262	602	1111	283	454	208	155	131	643	191	501	746	633	799	511	166	506	1236	313	785	790	380	430	837	899	19	123	110	274	727	188	534	353.5	267	68	855	335	102	565	115	511
K00290	LYS1; saccharopine dehydrogenase (NAD+, L-lysine forming) [EC:1.5.1.7]	1830.16	1724.36	1740.91	1814.08	1964.17	3060.33	2543.41	2212.21	1795.08	2127.76	1832.33	2026.5	1665.92	1798.84	2253.75	1652.82	2218.32	1944.41	2431.83	1059	2042.58	1393.5	1102.41	1904.5	1172.84	1934.75	75.5	997	1099.67	637.5	1273.75	773.59	702.58	1756.25	1427.42	1008	1640.57	1417.5	1231.2	1488.75	589	862.67
K00293	LYS9; saccharopine dehydrogenase (NADP+, L-glutamate forming) [EC:1.5.1.10]	780.5	754.5	739	1333	1496	1598.66	1629.33	1468.5	1120.5	535.5	649.33	613	497	618.84	605.5	563.83	819.17	675.83	590	302	477.83	254.5	271	636.67	269.5	322.83	25.5	797	753.17	184.83	257.5	157.17	161.17	117.5	431	130	899.58	512	434.34	343.5	672.5	385
K00294	E1.2.1.88; 1-pyrroline-5-carboxylate dehydrogenase [EC:1.2.1.88]	2251.42	2917.74	2444.68	2750.83	1838.83	4937.33	3835.59	3214.73	2709.82	4525.94	4240.49	3769.05	2852.45	2896.29	3502.92	4117.16	5331.38	4339.75	4909.27	3269.51	4512.26	2555.93	2190.8	3709.33	2594	2272.08	117	1999.67	1955.33	1667.5	2569	1410.89	2555.01	2556.61	2244.51	1251.17	4494.11	4279.21	2524.19	3971.33	2512.92	4970.73
K00297	metF, MTHFR; methylenetetrahydrofolate reductase (NADPH) [EC:1.5.1.20]	15472.6	16200	16202.8	19433	16332.1	24148.3	21664.5	18620	15567.4	17048.9	13767.3	17043.5	10656.6	16653.9	18028.8	13214.8	15805.1	16743.3	15561.6	9727.33	15968.1	13179.2	11763.7	17334.2	14475.5	15281.4	782.47	9152.65	10968.6	6670.26	10958	11249.5	12285.3	11486.1	15476.9	7144.08	18647	17037.9	10889.8	13456.9	7929.18	14906.9
K00298	ceo; N5-(carboxyethyl)ornithine synthase [EC:1.5.1.24]	0.17	0	1	0	0	0	0	0.11	0	1.33	0.67	0	0.22	0	0.33	1.17	0.5	0	0.11	0	0.17	0.17	0	0	0	0	0	0	0	0	0	0	0	0.44	0.11	0	0.67	0	0	0	0.5	0.56
K00299	ssuE; FMN reductase [EC:1.5.1.38]	602.33	947.9	526.29	728.5	724.45	1660.42	1163.58	912.86	863.5	911.65	893.55	917.59	497.87	731.4	729.62	730.37	1042.94	1026.85	564.35	861	581.77	621.38	626.02	1112.25	1286.28	1828.05	58.4	843.5	702.5	679.71	771.5	725.83	897.33	713.27	815.24	1047	1121.69	1072.5	690.34	577.16	285.5	895.81
K00301	E1.5.3.1; sarcosine oxidase [EC:1.5.3.1]	746.49	765.91	746.17	1588.66	517.25	1312.33	1630.83	1454.58	1199.58	1875.67	1386.82	1665.58	844.92	1365.33	1184.58	1868.24	1684.07	2252.08	1401.17	1230.41	1191.34	1074	549.16	910.09	1125.24	999.92	36.83	747.5	354	361	581.5	523.17	855.58	1509.75	534.08	380.5	1686.9	1489.16	800.91	1458	963	926.92
K00302	soxA; sarcosine oxidase, subunit alpha [EC:1.5.3.1]	3574.68	3236.47	3192.57	3251.33	3772.16	4614	3862.67	3410.29	2659.49	2249.76	2620.98	2344.02	2391.69	2522.34	3129.07	2213.34	3020.3	2437.75	3403.26	1576.09	3154.92	1218.53	1437.53	2255.18	1702.08	3075.57	115.53	2335.83	2085	982.1	1203.42	1904.42	1317.41	1644.25	2746.74	1174.17	3483.39	2566.48	2014.13	2268.75	1109.5	1191.66
K00303	soxB; sarcosine oxidase, subunit beta [EC:1.5.3.1]	7050.15	6727.99	6622.34	5917.33	6984.71	10299.7	9110.26	7913.48	6439.61	7151.59	6297.64	7046.39	6290.06	7192.06	8380.15	6902.57	7379.16	8212.42	8708.42	5601.31	9465.73	4609.7	5136.01	6470.61	7088.01	8620.64	420.52	4681.98	4708.34	3660.3	5204.58	3924.25	4690.99	6538.01	6023.65	4260.16	9992.28	6988.7	5129.62	8463.07	3410.33	4841.08
K00304	soxD; sarcosine oxidase, subunit delta [EC:1.5.3.1]	3410.49	3037.78	3011.88	3134.67	3728.33	4350	3673.33	3263.25	2511.41	1975.25	2387.49	2156.69	2228.7	2411.67	2904.9	1939	2748.48	2180.5	2965.09	1338.09	2771.25	1053.36	1305.04	2156.68	1486.58	2923.57	109.53	2236.66	2007.17	848.6	1001.42	1831.25	1046.91	1592.25	2519.25	1126.5	3124.9	2322.03	1846.69	1885.25	835.5	1018.66
K00305	soxG; sarcosine oxidase, subunit gamma [EC:1.5.3.1]	3084.83	2803.44	2746.54	3017.67	3795.33	4220	3536.33	3141.25	2411.75	1883.25	2277.15	2077.03	2148.7	2291.67	2765.24	1865	2623.16	2078.5	2829.25	1252.09	2679.25	924.02	1176.72	2059.34	1261.92	2460.91	111.53	1743.66	1721.17	819.6	920.42	1668.25	981.25	1556.25	2460.25	1125.5	3010.9	2231.03	1767.03	1736.25	780	952.16
K00306	PIPOX; sarcosine oxidase / L-pipecolate oxidase [EC:1.5.3.1 1.5.3.7]	15	58	13	4	4	6	2	2	1	12	11	18	8	8	4	19	14	23	10	4	14	50	10	8	24	8	0	21	11	0	15	5	1	1	1	0	45	3	0	8	5	23
K00311	ETFDH; electron-transferring-flavoprotein dehydrogenase [EC:1.5.5.1]	6372.41	6237.1	6322.51	8610.25	7662.51	13319.1	9966.41	8632.66	7212.42	7943.33	6734.48	7565.34	6666.14	7774.49	9049.9	7231.35	7701.29	8868.69	9581.44	6474.68	9893.22	6323.1	5903.87	9547.09	8016.85	8260.06	465.35	4274.82	4672.17	4181.8	5847.91	5973.58	7931.08	8384.9	7544.16	5789.66	9638.84	7825.59	5476.45	8800.97	4704.32	6232.88
K00313	fixC; electron transfer flavoprotein-quinone oxidoreductase [EC:1.5.5.-]	1931.36	2659.36	2034.26	4078.5	3476.93	7099.01	5435.17	4686.79	3955.59	3863.11	2927.58	3499.83	3248.5	3563.19	4263.81	3475.45	3276.96	3871.55	4253.91	3644.5	5249.48	3261.83	3029.07	4271.58	4961.26	5266.91	277.32	1660.66	2114.83	2480.59	2265.83	1610.83	2490.58	3840.4	3734.31	2651.49	4589.1	3979.89	2232.71	5210.02	2355.33	3830.42
K00314	SARDH; sarcosine dehydrogenase [EC:1.5.8.3]	1	0	2	0	0	0	0	0	0	2	0	0	0	0	0	1	0	3	0	0	0	1	0	0	0	1	0	0	0	0	0	0	0	0	0	0	1	0	0	0	0	0
K00315	DMGDH; dimethylglycine dehydrogenase [EC:1.5.8.4]	4510.16	4177.34	4087.34	5417	7031.5	6489	6850.5	6064	4623.66	2472.5	3430	2891.66	2208.5	3142	3277.66	2566.5	4006.32	2890	2852.34	1252.5	2781	1231.34	1772.32	3222.84	1355.66	2707.66	134	2852	2931	782	1131	2127	1125.16	1246	3048	1023	4370.5	3532	2822.66	1848	893	1009.5
K00316	spdH; spermidine dehydrogenase [EC:1.5.99.6]	2	6.6	8.2	78	15	73	143	111	100	16	18.4	10.2	2.7	10	14	11	23	12	11.25	14	24.25	8.6	2.8	25	5	18	0.2	65.5	6	2	19	20	20	3	0	3	21.4	14.2	7.2	13	0	4.75
K00317	dmd-tmd; dimethylamine/trimethylamine dehydrogenase [EC:1.5.8.1 1.5.8.2]	39	94	26	6	11	23	31	16	9	81	198	114	218	82	197	100	261	143	291	98	368	21	8	14	23	59	0	15	14	4	24	18	58	45	192	4	113.25	160	84	260	14	180
K00318	PRODH; proline dehydrogenase [EC:1.5.-.-]	6975.22	6355.7	7044.14	5298.01	3842.1	8679.49	7308.59	6309.21	5302.74	8977.59	7746.66	8340.3	5740.59	6098.78	6990.98	8235.89	9514.76	9972.33	8087.87	6073.76	7961.77	5745.59	6667.96	7244.24	7550.76	7372.82	414.15	3810.16	3895.83	4108	5485.5	4215.05	5934.59	7875.62	6115.12	5738.99	9183.69	8708.49	5721.76	7483.82	4274.92	6668.88
K00319	mtd; methylenetetrahydromethanopterin dehydrogenase [EC:1.5.98.1]	45.5	19	47	8	8	11	21	29	15	57	34.5	41.5	24	17	19.5	32.5	33.5	22	67	38	38	25	36	20	48	56	0	63	8	87	112	35	42	9	97	24	81	34.5	28	20	22.5	42.5
K00320	mer; 5,10-methylenetetrahydromethanopterin reductase [EC:1.5.98.2]	4338.16	3747.07	4603.64	3351.17	2601.43	6283.33	6359.34	5539.58	4653.26	5448.5	4224.16	5200.25	4825.75	5013.49	5654.41	5028.9	4932.21	6311.75	6960.66	4723.75	6464.68	4331.16	4604.32	3967.08	5929.26	5217.41	382.65	2519.16	2691.83	3358.5	3882.33	2665.83	3845.08	6362.9	5719.41	4185.99	6559.4	5675.64	3635.09	7115.82	3071.83	5373.59
K00322	sthA, udhA; NAD(P) transhydrogenase [EC:1.6.1.1]	1652.09	2012.27	1500.49	1464.07	2614.28	3470.51	1752.66	1405.91	1302.36	1681.32	1762.05	1793.39	1510.89	1131.07	1626.71	1598.76	2045.78	2099.71	2565.19	1611.84	2552.15	1225.42	1427.65	1558.72	1213.96	1423.62	65.36	737.5	590	773.91	1618.24	1324.92	1525.91	972.75	958.04	635.51	1700.93	2217.62	1775.6	1789.15	965.66	1569.46
K00324	pntA; NAD(P) transhydrogenase subunit alpha [EC:1.6.1.2]	9108.44	12096.5	8815.39	21444	17073.3	25004	19982.7	16802.9	14853.2	14335.1	12102.2	13902.2	10347	14242.2	15174.4	11413.5	13875.7	14706.3	13179.8	9253.84	13271.3	11324.8	8483.78	22127.1	12428.5	13868.5	683.73	8241.82	12234.8	5908.51	11176.1	12426.7	14148.4	11427.6	21643.6	7390.84	14981.7	14096	9221.56	11338.3	6538.82	17660.1
K00325	pntB; NAD(P) transhydrogenase subunit beta [EC:1.6.1.2]	5473.85	7003.44	5279.02	12127.9	9612.95	14849.8	11551.6	9775.17	8532.53	7935.9	6809.82	8032.9	6045.45	8058.23	8686.54	6363.13	7769.95	8666.43	7809.5	5251.59	7690.19	6416.27	4704.65	12042	7498.13	9118.62	383.03	4702.49	6743.67	3356.71	6217.41	6901.58	7577.41	6608.25	11618.1	4529.67	8239.51	7554.71	5108.28	6305.4	3724.49	9397.24
K00326	E1.6.2.2; cytochrome-b5 reductase [EC:1.6.2.2]	0	0	0	1	0	0	0	0	0	0	0	1	0	0	3	2	0	0	0	0	0	0	0	0	0	0	0	0	0	0	0	0	0	0	0	0	0	0	0	0	0	1.67
K00329	E1.6.5.3; NADH dehydrogenase [EC:1.6.5.3]	914	792	845	451	1304	633	538	457	365	351	628	489	561	905	958	377	704	462	622	109	482	191	227	483	197	229	18	500	563	68	185	354	179	557	302.5	189	687	480	461	311	258	131
K00330	nuoA; NADH-quinone oxidoreductase subunit A [EC:1.6.5.3]	16191.9	19196.3	16357.4	19261.7	16000.5	27052.6	22539.5	19257.4	16401.6	19033.4	15475.8	17614.2	14899.4	17133.1	19561.3	15814.4	17717.2	18617	22248.2	14684	21938.7	15862.1	14077.4	22352	19951.4	18763.9	1010.88	9439.99	11946.8	8933.4	18631.4	13204.3	17749.5	15951.8	20973.5	9826.66	22736.3	20770.6	12865.9	20651.7	9839.49	22126
K00331	nuoB; NADH-quinone oxidoreductase subunit B [EC:1.6.5.3]	15623.7	18131.5	15903.3	18524.7	15525.1	26091.9	21516.8	18430.7	15636.8	18287.9	14707.7	17042.2	14030.8	16532.6	18642	15066.5	16877.8	17887.5	20789.5	13660.3	20288.9	15596.7	13664.4	20925.5	19443.2	18242.9	979.34	9018.32	11859.5	8650.73	18136.1	13088.6	17102.2	15261	20782	9499.49	21985.8	19719	12173.9	19068	9340.16	20070.8
K00332	nuoC; NADH-quinone oxidoreductase subunit C [EC:1.6.5.3]	11188.9	14164.1	11269.5	14751.9	12928.3	17648.1	15597.3	13339.2	11402.2	12699.2	10246.1	11657.1	8836.95	11357.9	12741	9953	11687.4	11408.3	13044.9	8818.71	13429.7	11302.2	9058.49	16822.6	13563.9	12997.3	694.83	6546.17	9345.83	5787.49	12128	10541.5	12828.7	8884	14238.7	5283.34	15409.9	14089.5	8481.76	12346.4	6054.5	14927.8
K00333	nuoD; NADH-quinone oxidoreductase subunit D [EC:1.6.5.3]	11736.9	14609.1	12026.5	14905.9	13191.3	17987.1	16100.3	13739.2	11784.2	13224.2	10551.1	12192.1	9330.95	11938.9	13260	10302	11957.4	11765.3	14146.9	9072.71	13740.7	12101.2	9564.49	17244.6	14262.9	13095.3	702.83	6629.17	9515.83	6093.49	14787	10810.5	13381.7	9199	15384.7	5428.34	16157	14429.5	8702.76	12765.4	6205.5	15403.8
K00334	nuoE; NADH-quinone oxidoreductase subunit E [EC:1.6.5.3]	16175.2	17839.8	17471.9	21922.3	19023.7	25541.9	21904.6	18977	15857.8	18081.8	13180.6	17250.7	11605	16479.9	18063.2	13431	14635.1	15651.9	17370	11196.5	16897	16321.8	14120.6	22188.8	16751	15554.5	828.51	8250.83	11173.5	7136.67	13891.1	11843.8	14352.3	11700.2	15612.8	6843.17	20058.6	17794.4	10936.1	15711.9	8585.01	16969.9
K00335	nuoF; NADH-quinone oxidoreductase subunit F [EC:1.6.5.3]	15731.7	17386.3	16700.4	20360.6	16919	24086.6	21541.5	18511.1	15592.3	16921.5	12779.5	16189.5	12126.8	16498.8	18082.2	12520.5	14259.7	14689.3	18857.5	11141.5	17378.5	15196.3	12568.3	21371.1	16620	15275.6	801.5	8352.99	11191.8	7153.67	14201.7	12243.1	14629.6	11744.7	16356.5	6862.33	18566.2	16686.9	10516.4	16287.9	9245.01	18585.4
K00336	nuoG; NADH-quinone oxidoreductase subunit G [EC:1.6.5.3]	13856.1	15122.9	14909.7	18084.3	15554.1	21969	18947.5	16318.3	13751.3	14788.1	11198	14314.4	9350.91	13543.5	14371.6	11062	12548.9	13166.4	13812.5	8885.48	13031.8	13555	11741.6	19187	13441.3	12803.7	694.27	6987	9686.74	5811.97	11855.2	10339.1	12423.8	9932.95	14663.6	6116.67	15422.1	14532.2	9103.36	12654.5	7140.26	14873.2
K00337	nuoH; NADH-quinone oxidoreductase subunit H [EC:1.6.5.3]	16462.2	19250.9	16766.2	19966.8	16991.4	27272.6	23406.3	19995.6	17104.9	19461.6	15700	18134.2	14960.6	18326.8	20542	16022.2	17867.8	18874.5	22355.3	14673	21864.3	16160.8	14324	22235	20393.4	19233.9	1089.68	9732.66	12424.2	9559.4	19047.4	14050.4	17771.8	16114.8	21203.2	9984.33	23053.9	20825	13107.7	20477.7	9744.49	21068
K00338	nuoI; NADH-quinone oxidoreductase subunit I [EC:1.6.5.3]	16115.9	18456	16469.5	18985	16011.5	25662.6	21502.2	18440.9	15618.6	18405.6	14754.7	17335.3	14084.1	17580.5	19675	14991.4	16817	17816.2	21078	13740.6	20697	15965.8	14152.5	21614.3	20118.4	18577	981.68	9028.66	11549.2	8666.73	18233.9	13058.9	17487.5	14979.8	20641.7	9510.83	22196.7	20043.7	12582.5	19822	9562.16	21099.5
K00339	nuoJ; NADH-quinone oxidoreductase subunit J [EC:1.6.5.3]	19584	21447.1	20033.3	20776.2	17815.1	30238.1	26080.2	22365	18939.4	23071.2	18358.3	21773.2	18101.7	21948	24568.3	19405.4	21064.3	23490.7	26087.2	17771.8	26307	19126.3	17831.9	24560.5	25018.7	23316	1285.34	11205.3	13681.5	11142.7	21266.6	15134.1	20456.5	21236.5	25589.5	13530.8	27504.2	24683.2	15566.4	25269.7	11936.5	24678.2
K00340	nuoK; NADH-quinone oxidoreductase subunit K [EC:1.6.5.3]	15737.9	18293.9	15965.8	18320	15366.5	25238.6	21926.2	18828.5	15988.6	18152.6	14621.7	16951.3	14098.1	16559.5	18751	14967.4	16772	17803.2	20896	13719.6	20590	15581.8	13692.5	21277.3	19407.4	18080	1017.68	8881.66	11803.2	8687.73	18059.9	12872.9	17201.5	15230.8	20652.7	9467.83	21959.7	19878.7	12292.5	19450	9510.16	21035.5
K00341	nuoL; NADH-quinone oxidoreductase subunit L [EC:1.6.5.3]	16802.3	19890.4	17124.1	19951.3	16657.4	28287.2	24326.3	20857.2	17738.6	20417.6	16428	18999.2	15311.6	18469.6	20591.3	17009.7	18700.5	19950.2	21872	15401.5	22088.9	17834.8	15139.6	23841.3	23375.4	23183	1264.67	10151.8	13137	10608.4	18834.6	13894.8	18586.8	17592.5	22311.8	11562.3	24914.5	21798.2	14163.9	21385	10211.8	21514.7
K00342	nuoM; NADH-quinone oxidoreductase subunit M [EC:1.6.5.3]	17494.8	20157.2	18239.7	21612.1	18531.2	29343.9	26081	22289.2	19095.2	21081.1	16679.2	19587.2	16124.1	20000	22169.1	17263.5	18923.8	20191	24267.5	15561.1	23074	18369.8	15889	23564.2	21894.5	20037.9	1138.01	10098.8	12970	9924.9	21675.4	14380.8	18765.8	16711.3	22405.2	10384	25007.2	22080	13609.2	21411.4	10117.2	22016.7
K00343	nuoN; NADH-quinone oxidoreductase subunit N [EC:1.6.5.3]	16437.9	19145.9	16746.8	20023	16631.5	26903.6	22627.2	19338	16473.6	19185.1	15471.7	17946.3	14788.1	18224.5	20457	15778.4	17591.5	18634.7	22017.5	14472.6	21743	16128.8	14230	22082.3	20107.4	18689.5	1008.68	9507.66	11895.2	8966.73	18824.4	13460.9	17507.5	15943.8	21101.2	9869.33	22876.2	20719.7	12996	20106	9746.16	20882
K00344	qor, CRYZ; NADPH2:quinone reductase [EC:1.6.5.5]	16081.4	16847	16050.9	16817.2	14256.7	23580.7	19462.7	17053	14189.4	17243.4	15170.1	17541.1	14320.7	16944	18711	15200.7	17599.2	20051.1	20946.9	15198	19537	13950.6	14169.1	18081	21073.5	25431.4	1046.36	11094.6	12981.8	9065.68	13755.2	13547.8	16897.9	16878.8	22442.3	12717	22242.6	19295.5	13297	20050.4	10130	17527.5
K00346	nqrA; Na+-transporting NADH:ubiquinone oxidoreductase subunit A [EC:1.6.5.8]	1574.18	1412.88	1726.42	1974.59	1274.62	3005.84	1735.41	1511	1255.61	2979.51	2700.36	2683.43	1744.65	2455.01	2758.32	2345.95	3430.17	2701.03	3099.36	1416.68	2562.13	1834.68	1369.65	1732.38	1828.3	1648.87	52.53	1200.16	722.17	750.05	1149.41	829.42	950.42	1293.09	1008.92	634.17	1905.18	1964.7	1552.66	1876.08	1369.82	1485.37
K00347	nqrB; Na+-transporting NADH:ubiquinone oxidoreductase subunit B [EC:1.6.5.8]	1515.32	1413.95	1697.21	2188.59	1274.41	3246.34	1869.34	1643.07	1371.9	3049.51	2739.19	2778.22	1775.65	2498.51	2794.32	2408.45	3483.34	2835.03	3148.86	1429.68	2619.13	1925.68	1409.65	1769.88	1846.8	1652.87	56.03	1216.16	739.17	776.55	1195.91	883.92	1008.42	1347.95	1098.92	757.67	2090.18	2147.03	1622.16	1895.58	1392.32	1522.87
K00348	nqrC; Na+-transporting NADH:ubiquinone oxidoreductase subunit C [EC:1.6.5.8]	1603.44	1445.07	1774.21	2190.59	1295.41	3260.34	1875.34	1646.07	1375.9	3059.65	2771.02	2790.51	1795.65	2498.51	2794.32	2419.74	3509.48	2853.03	3185.86	1434.68	2623.13	1938.68	1419.65	1766.88	1853.8	1662.87	56.03	1216.16	747.17	776.55	1194.91	885.92	1022.42	1347.95	1098.92	757.67	2088.14	2147.03	1626.99	1902.58	1392.32	1524.87
K00349	nqrD; Na+-transporting NADH:ubiquinone oxidoreductase subunit D [EC:1.6.5.8]	1601.32	1444.95	1769.21	2190.59	1294.41	3252.34	1872.34	1645.07	1372.9	3060.51	2768.19	2792.22	1794.65	2498.51	2794.32	2419.45	3512.34	2850.03	3184.86	1433.68	2622.13	1938.68	1419.65	1766.88	1847.8	1662.87	56.03	1216.16	748.17	776.55	1195.91	884.92	1018.42	1347.95	1098.92	757.67	2089.18	2146.03	1626.16	1902.58	1392.32	1522.87
K00350	nqrE; Na+-transporting NADH:ubiquinone oxidoreductase subunit E [EC:1.6.5.8]	1601.44	1445.07	1769.21	2190.59	1294.41	3252.34	1872.34	1645.07	1372.9	3060.51	2768.31	2792.22	1794.65	2498.51	2794.32	2419.45	3512.34	2850.03	3184.86	1433.68	2622.13	1938.68	1419.65	1766.88	1847.8	1662.87	56.03	1216.16	748.17	776.55	1195.91	884.92	1018.42	1347.95	1098.92	757.67	2089.43	2146.03	1626.28	1902.58	1392.32	1522.87
K00351	nqrF; Na+-transporting NADH:ubiquinone oxidoreductase subunit F [EC:1.6.5.8]	1525.32	1369.95	1701.21	2187.59	1279.41	3229.34	1863.34	1628.07	1362.9	2936.51	2600.19	2685.22	1714.65	2444.51	2726.32	2284.45	3298.34	2744.03	3023.86	1263.68	2431.13	1865.68	1394.65	1710.88	1787.8	1619.87	56.03	1199.16	733.17	790.55	1175.91	872.92	993.42	1355.95	1095.92	749.67	1945.18	2074.03	1582.16	1721.58	1381.32	1361.87
K00354	E1.6.99.1; NADPH2 dehydrogenase [EC:1.6.99.1]	52.57	57.79	57.38	121.88	11.5	96.62	27.5	23.99	13.21	71.5	101.83	63.41	36.17	22.38	34.21	70.33	131.49	66.83	10.73	24.25	48.34	45.8	78.58	33.88	46.25	35.88	1.12	17	3.12	3.25	25.5	30.11	89.5	398.82	35.11	6.75	139.96	76.91	97.5	25.88	9.76	13.18
K00355	NQO1; NAD(P)H dehydrogenase (quinone) [EC:1.6.5.2]	181.87	208.14	201.83	87.34	44.86	362	218.53	200.5	154.67	246.54	225.82	204.16	342.11	244.54	484.15	266.83	322.96	265.5	479.25	184.68	552.45	78.14	148.34	88.34	154.94	126.52	10.26	113.49	178.67	213.93	152.54	223	269.17	337.5	460	258	228.7	281.34	165.67	411.5	120	202.14
K00356	E1.6.99.3; NADH dehydrogenase [EC:1.6.99.3]	7132.99	6975.32	7337.98	7101.5	6011.43	10920.3	9479.17	8128.66	6795.42	9150.08	6739.41	8560.08	6952.38	8398.89	9470.16	7448.9	7605.2	9077.5	9470.08	6151.8	9384.73	8765.25	6841.73	10395.9	10122	11102.5	537.32	5103.99	7180	4510	5800.08	5846.58	8402.83	8300.65	14832.7	5554.49	12029.9	8942.89	6009.67	9272.57	4333.33	6816.93
K00360	nasB; assimilatory nitrate reductase electron transfer subunit [EC:1.7.99.-]	24	22	22	7	1	8	12	7	11	16	27	25.5	57	70	40	19	60	25	107	274	91.5	19	32.5	9	36	35	3	194	40	165	50	15	34	10	25.5	14	28.67	21	13.5	129	33	93
K00362	nirB; nitrite reductase (NADH) large subunit [EC:1.7.1.15]	3963.66	4448.63	3918.01	3097	6046.69	6298.5	4182.08	3495.73	3002.32	4319.21	3098.38	4470.39	2760.11	4592.24	4597.62	2492.65	3445.14	3425.32	4235.32	2166.44	3152.35	4772.59	3403.51	7116.89	5264.01	5931.91	187.69	2596.82	3308.51	1605.59	3020.16	4378.72	4807.67	2513.03	8981.8	1814.34	4819.88	3796.95	3376.77	2847.72	2091.75	2343.66
K00363	nirD; nitrite reductase (NADH) small subunit [EC:1.7.1.15]	3234.01	3644.67	3022.5	1943.66	4045.45	3877.24	2615.4	2195.99	1809.28	3173.99	2932.04	3267.28	2226.78	2639.57	2737.21	2589.74	3420.36	3213.62	3456.74	2046.76	2839.44	3218.5	2657.66	5052.31	4026.79	5579.13	159.69	2407.99	2537.51	1330.41	2319.58	2379.2	2402.59	1827.92	8895.54	1738.67	4759.8	3738.62	3098.33	2401.06	1510.04	2209.25
K00364	E1.7.1.7, guaC; GMP reductase [EC:1.7.1.7]	334.59	302.83	381.14	108.83	122.29	212	257.33	207.94	178.28	596.73	261.92	538.45	114.22	153.67	275.88	263.81	234.87	289.68	103.86	108	304.19	686.84	337.92	582.21	237.29	121.88	14.5	118	135	59.91	106.5	93.78	180.5	267.94	90.91	127.5	512.04	399.44	252.16	197.4	36.88	182.81
K00365	uaZ; urate oxidase [EC:1.7.3.3]	423.83	643.83	414	437.5	349	354	718.5	646	498	1072.5	700	955.33	445	675	620.83	914.83	840.33	1052	704.83	617	735.5	689	630.33	1166.5	639.5	845	26	314	462	354.5	588.5	626.5	532	419	228	886	1127	895.5	532.5	694.67	377	711.17
K00366	nirA; ferredoxin-nitrite reductase [EC:1.7.7.1]	6153.96	5721.04	6506.41	6368.83	3198.65	8936.99	9751.27	8429.89	6970.31	7982.66	6847.82	7893.79	6660.67	7036.65	8017.65	7446.96	8077.41	9897.49	8325.32	6699.5	8133.54	5848.16	7344.81	6956.66	10392.4	11424.7	600.47	4616.82	4565.66	5587.3	7170.33	4060.49	6464.15	11453.6	10243.8	7352.48	9292.91	9706.78	6175.96	8164.97	4668.16	6316.51
K00367	narB; ferredoxin-nitrate reductase [EC:1.7.7.2]	252.17	209.33	315.67	555.84	133.83	392.33	416.5	342.83	275.16	156.67	145	733.5	287.33	217.34	379.83	146.16	128.33	1167.5	390.83	290.67	509	186.83	154.33	108.83	280.08	473.5	4.5	149	140	139.5	189.5	75.83	82.33	566.5	247.33	261.5	313.49	364.33	76	333	209	341.33
K00368	nirK; nitrite reductase (NO-forming) [EC:1.7.2.1]	2200.57	2986.49	2060.82	3339	2371.85	6022.91	4384.09	3700.08	3224.67	3245.16	2838.09	2942.91	2696.59	3172.16	3664.65	3024.31	3173.85	3182.58	3237.5	3366.5	4214.6	2508	2630.48	3788.92	4725.67	5449.15	313.65	2018.66	2037.33	2552.33	2164	1655.83	2699.66	4008.15	4409.91	3228.99	4835.56	4018.22	2745.67	4240.9	1744.33	2825.67
K00370	narG, narZ, nxrA; nitrate reductase / nitrite oxidoreductase, alpha subunit [EC:1.7.5.1 1.7.99.-]	817.77	791.31	727.99	530.91	1846.58	1254.67	608.42	510	450.42	560.6	632.65	834.45	799.78	375.13	606.32	516.77	869.34	1042.94	1412.91	700.93	908.88	420.6	946.41	279.25	342.91	478.49	43.86	412.66	250	468.82	415.92	328.86	581.75	229.57	118.68	187	720.15	1025.72	964.87	772.29	577.71	437.41
K00371	narH, narY, nxrB; nitrate reductase / nitrite oxidoreductase, beta subunit [EC:1.7.5.1 1.7.99.-]	818.77	793.31	735.99	533.91	1846.58	1253.67	608.42	514	455.42	570.6	638.65	844.45	813.78	378.63	611.32	525.77	878.34	1045.94	1423.41	707.93	917.88	429.6	950.41	286.25	344.91	483.49	43.86	412.66	250	468.82	415.92	330.86	588.75	257.57	125.68	201	732.48	1031.72	965.87	796.29	579.71	442.41
K00372	nasA; assimilatory nitrate reductase catalytic subunit [EC:1.7.99.-]	4970.5	4644.47	4764.56	3477.99	4494.88	5659.08	4775.91	4166.41	3436.09	4687.76	4308.67	4665.65	3241.03	2820.16	3145.98	4029.35	5126.68	5321.69	5344.65	3310.34	3973.27	3567.34	4196.31	5078.84	4801.47	6531.37	157.18	2263.32	2246.67	1665.18	3551.91	2835.36	3038.33	3755.15	2655.66	2179.83	5549.82	5163.25	4090.83	4002.15	2406.42	3430.51
K00373	narJ, narW; nitrate reductase molybdenum cofactor assembly chaperone NarJ/NarW	804.43	775.98	710.99	703.92	1812.57	2188.01	591.75	511	457.75	522.28	552.65	789.44	792.12	365.8	597.34	490.11	774.7	983.28	1393.92	686.93	900.53	414.27	944.41	264.92	284.24	394.5	34.53	391.33	201	441.82	309.92	283.86	455.08	243.25	115.35	201	714.49	1015.73	958.19	753.29	527.71	407.08
K00374	narI, narV; nitrate reductase gamma subunit [EC:1.7.5.1 1.7.99.-]	865.93	824.48	757.99	521.42	1842.07	1247.01	680.75	569.25	512.5	580.53	579.4	855.44	798.87	374.8	597.59	505.11	789.2	995.28	1408.42	690.93	905.78	445.02	1046.16	310.42	332.99	429.75	46.53	476.83	291.5	568.32	889.17	474.11	572.83	239.5	119.43	205.5	754.99	1094.73	1020.19	757.04	534.71	431.58
K00375	K00375; GntR family transcriptional regulator / MocR family aminotransferase	3042.49	2916	3114.2	3396.71	2521.72	5003.7	3841.01	3420.27	2746.04	2275.92	2363.54	3125.08	2862.32	2834.17	3706.12	2073.92	2681.96	3677.2	3991.74	2372.61	4095.26	2008.19	1821.04	2139.57	4398.77	6448.2	152.54	2625.31	2266.63	1536.67	2061.26	2448.43	2392.6	3193.07	3197.67	2424.26	3192.65	2647.48	1823.67	3033.45	1558.06	2686.83
K00376	nosZ; nitrous-oxide reductase [EC:1.7.2.4]	1049.83	1419.76	1011.5	1123.5	2468.51	3083.83	1913.83	1519.49	1417.83	1342	1540.39	1602.86	1173.1	1147.83	1223.98	1376.49	1899.98	2014.83	1547.4	1289.59	1724.67	873.93	1308.28	1059.83	561.01	708.82	40.69	603.66	384.5	437	581.66	539.5	1028.5	1179.32	594.99	274.66	2253.38	2794.51	1644.21	1722.65	739.66	886.67
K00380	cysJ; sulfite reductase (NADPH) flavoprotein alpha-component [EC:1.8.1.2]	1739.34	2140.68	1688.08	839.16	2224.12	2528.58	1201.24	961.08	879.37	2358.23	2261.97	2309.64	1297.74	1445.07	1628.63	2261.51	2914.71	2890.29	2007.03	1141	1662.82	1376.94	1459.39	2641.3	3158.71	4023.88	85.2	547	1943.67	626.31	833.66	514.11	1127	1719	745.05	632.67	1884.12	2241.39	1975.34	1268.65	1049.21	970.63
K00381	cysI; sulfite reductase (NADPH) hemoprotein beta-component [EC:1.8.1.2]	3657.84	4181.03	3522.11	3364.91	5233.78	6982.92	4332.25	3664.16	3102.53	3850.4	3617.04	3853.92	2903.09	3960.24	4392.04	3141.52	4237.7	3961.21	4381.87	2483.26	3781.98	3817.87	2787.44	6038.64	4134.13	4947.45	213.23	2998.83	4838.17	1690.21	2243.08	3624.53	4889.58	3062.25	9531.46	1672.34	3948.85	3497.83	3035.92	3436.56	2063.87	2332.46
K00382	DLD, lpd, pdhD; dihydrolipoamide dehydrogenase [EC:1.8.1.4]	30977.6	32791.3	31647.2	38700.2	30922.3	51050.4	43671.4	37571.2	31625.7	36606.3	30549.3	35358	27066.8	34622.2	37808.1	30104.9	35650.9	37295	37157.9	25025.8	36849.7	30796.6	27689.5	43964.1	37613.8	38825.2	2224.78	20492.6	27388.4	18886.2	28168.2	25475.2	31392.2	32917	56873.5	22834.8	41691.3	37552.1	24797.3	33915.8	19160.9	35595.2
K00383	GSR, gor; glutathione reductase (NADPH) [EC:1.8.1.7]	4197.77	4868.18	3961.75	6291.93	7381.98	8137.34	6000.03	5099.07	4332.42	5606.68	5747.36	6037.37	3669.04	4599.22	5242.28	4758.93	7026.44	6720.13	5449.44	2981.85	4946.97	3741.43	3263.47	8544.38	4621.23	6296.82	256.03	3415.16	4777.67	2030.82	3512.61	3221.42	3569.91	3672.09	10105.9	1944.84	6021.12	5118.12	4019.85	3642.48	2519.49	3065.85
K00384	trxB, TRR; thioredoxin reductase (NADPH) [EC:1.8.1.9]	30082.2	30935	31459.9	34519.3	25530.3	43510.2	44147.7	37876.5	31753.5	36867.4	31284.8	34896.9	24820.7	30153.4	34365.5	30950.3	37107.4	37580.8	36377.1	24086.1	36531.1	26085.6	25947.8	34066.5	32944.9	33854	1973.64	17834.1	19713.3	17334.3	29175.3	20791.7	27703.5	30273.9	30937	18325.7	41030.3	38024.5	23823.5	33725.8	18188.4	31405.5
K00385	asrC; anaerobic sulfite reductase subunit C	32.14	13.57	46.04	25	4.29	15	24.43	24.57	19.29	20	8	19.29	9	22	36	20	14	25	15.5	30	55	49	30.25	13	9	21	0	18.5	10	42	95	29	39	11.86	38	3.5	27	16.25	24	119	54	21
K00387	SUOX; sulfite oxidase [EC:1.8.3.1]	4.33	13.67	11.67	1	0	1	3	1	1.33	12	23.67	5.33	7.5	0	15.33	8	20.66	14	18.17	0	15	0.67	7.66	5.67	5.33	28.33	0	68	23	51	11	0	12.33	0	24	1	5	6	3.33	4	0	26
K00389	yidH; putative membrane protein	497.9	564.98	566.96	607	320.79	638.67	637.83	549.82	417.99	1405.98	1699.16	1151.46	741.22	848.07	952.62	1393.54	2314.23	1489.93	1176.69	775.33	1089.03	866.66	512.2	512.5	963.61	1191.89	32.33	858.33	381	417.08	779.5	800.67	496.83	869.44	555.9	371	1124.34	1251.26	741.11	777.24	348.83	795.64
K00390	cysH; phosphoadenosine phosphosulfate reductase [EC:1.8.4.8 1.8.4.10]	12108.2	13980.7	12176.2	13427.7	11522.9	20983.2	15774.6	13509.4	11440.6	15527.1	13630.6	15108	11670.8	13780.1	15957.9	13536.2	16146.4	17496.8	16302.5	10664.7	17426.8	11658.8	10619.1	14853.2	13764.6	14957.2	830.68	8488.82	10040.5	7525.71	11455.9	10446.1	13424.2	14283.3	18360	9319.83	17703.1	16452.9	10595.1	15353	7817.58	15842.9
K00392	sir; sulfite reductase (ferredoxin) [EC:1.8.7.1]	1682.3	2215.39	1983.63	3522.83	2543.62	4364.16	4020.26	3458.23	2834.95	3428.84	2897.99	3566.79	1563.83	2097.34	2163.49	3002.15	3598.99	4330.33	2259.16	1912.33	2487.84	2780.66	2385	3046.5	2228.82	2575.84	87.33	1544.5	1350.5	1120	1780.5	1266.5	1597.83	1419.86	987.49	1358.5	3722.81	3332.16	1585	2685.17	1732	2603.17
K00394	aprA; adenylylsulfate reductase, subunit A [EC:1.8.99.2]	1706.7	1649.45	1930.53	2162.5	3833.5	2348.5	2080.5	1824.88	1556.5	2080.17	1244	2347.33	1220.3	2347.57	2658.17	1370.5	1424	2039	2054	822.97	2173.97	2125.5	2297.5	1589	1232.5	1049	66	547.5	617.5	549.7	1313	1023.5	913.67	757.5	269	380	4529.5	2939.2	2052.2	1318.5	630.33	961.83
K00395	aprB; adenylylsulfate reductase, subunit B [EC:1.8.99.2]	1706.7	1649.45	1930.53	2162.5	3833.5	2348.5	2080.5	1824.88	1556.5	2080.17	1244	2347.33	1220.3	2347.57	2658.17	1370.5	1424	2039	2054	822.97	2173.97	2125.5	2297.5	1589	1232.5	1049	66	547.5	617.5	549.7	1313	1023.5	913.67	757.5	269	380	4529.5	2939.2	2052.2	1318.5	630.33	961.83
K00399	mcrA; methyl-coenzyme M reductase alpha subunit [EC:2.8.4.1]	9.5	10	7	1	0	3	0	0	3	24	39.5	41.5	8	0	5.5	37.5	56.5	27	17	12	12	5	36	5	11	25	0	6	0	32	3	10	43	1	1	15	77	122.5	42	8	1.5	3.5
K00400	K00400; methyl coenzyme M reductase system, component A2	10	10	7	1	0	3	0	0	3	25	40	42	13	0	7	38	57	28	31	12	12	6	36	5	11	25	0	6	0	32	3	10	44	1	2	15	78	123	42	8	3	7
K00401	mcrB; methyl-coenzyme M reductase beta subunit [EC:2.8.4.1]	9.5	10	7	1	0	3	0	0	3	24	39.5	41.5	8	0	5.5	37.5	56.5	27	17	12	12	5	36	5	11	25	0	6	0	32	3	10	43	1	1	15	77	122.5	42	8	1.5	3.5
K00402	mcrG; methyl-coenzyme M reductase gamma subunit [EC:2.8.4.1]	9.5	10	7	1	0	3	0	0	3	24	39.5	41.5	8	0	5.5	37.5	56.5	27	17	12	12	5	36	5	11	25	0	6	0	32	3	10	43	1	1	15	77	122.5	42	8	1.5	3.5
K00404	ccoN; cytochrome c oxidase cbb3-type subunit I [EC:1.9.3.1]	3669.25	4384.36	3543.13	3833.75	6017.83	8918.92	5102.91	4272	3673.95	3922.67	3420.35	3985.61	2480.67	3808.17	3898.4	2749.54	3891	3498.11	3259.53	2081.26	3185.21	4470.07	3215.78	6975.47	4847.09	5719.57	222.63	3180.83	4928.17	1717.5	2590.58	4020.75	5123.41	2581.25	9554.67	1523.67	5415.21	4803.97	3409.64	3017.66	1886.99	2195.71
K00405	ccoO; cytochrome c oxidase cbb3-type subunit II	3655.58	4371.16	3525.4	3838.75	6167.83	8909.92	5103.91	4272	3673.95	3923.67	3382.55	3978.88	2438.27	3777.17	3863.07	2741.87	3855.33	3485.11	3150.2	2053.26	3109.21	4447.87	3207.18	6969.47	4849.09	5718.57	224.23	3220.83	4940.17	1717.5	2569.58	4024.75	5149.41	2541.25	9544.67	1521.67	5370.08	4737.9	3374.57	2958.66	1863.66	2101.71
K00406	ccoP; cytochrome c oxidase cbb3-type subunit III	4467.99	5283.98	4568.64	4802.41	6079.66	8465.74	5635.66	4798.57	4019.11	5687.17	5231.2	5327.55	3403.09	4633.02	5077.82	4464.62	6238.91	5274.1	4878.7	3071.68	4777.88	4963.95	3528.84	7492.97	5287.59	6305.82	268.73	3820.5	5381.17	2339	3600.08	4584.59	5804.75	3396.42	10297	2168.34	6478.31	5290.98	4176.4	3740.99	2739.16	3325.21
K00407	ccoQ; cytochrome c oxidase cbb3-type subunit IV	1926.08	1892.66	1785.4	2495.75	2955.33	5035.92	3012.91	2608.5	2131.95	1874.17	1556.55	1891.38	1193.27	1932.67	2168.07	1253.37	1692.83	1510.11	1557.7	1037.26	1830.71	2419.37	1422.68	2628.97	2466.09	2918.07	89.23	1667.83	1882.17	716.5	1198.58	2580.75	3624.41	1151.25	1284.5	689.67	3334.08	2083.9	1497.07	1572.16	935.66	1000.21
K00410	fbcH; ubiquinol-cytochrome c reductase cytochrome b/c1 subunit	34.5	33	32.5	53	8	71	123	119	104	12.5	25	20	39	19	36	23	33	40.5	19	51	69	78	73	74	575	811	3	52	33	31	19	6	138	19	12	8	48	26	22	25	1	26
K00411	UQCRFS1, RIP1, petA; ubiquinol-cytochrome c reductase iron-sulfur subunit [EC:1.10.2.2]	4572.25	5470.81	4560.7	7813.75	8183.83	10002.2	8097.74	6793	5874.2	5433.31	4543.36	5328.97	3282.73	5351.17	5662.24	3907.49	5146.13	4761.86	4525.53	2981.26	4343.21	5407.77	3803.05	10608.1	5497.76	6512.57	314.03	4320.16	6295.84	2510.3	4021.58	5671.75	6086.58	3501.75	17793.2	2215.67	7574.14	5380.45	4272.16	4012.66	2356.66	2905.04
K00412	CYTB, petB; ubiquinol-cytochrome c reductase cytochrome b subunit	4928.58	6015.74	4934.9	12104.6	9008.33	12583.4	9397.57	8060.83	7005.87	6592.81	5021.92	6295.17	5112.6	7747.67	8299.74	4718.82	5640.13	6065.02	5851.53	3411.76	6439.55	6367.04	4047.35	10484.6	5965.76	6782.24	328.73	3842.66	6401.34	2532.8	4999.08	6333.75	6476.75	6182.75	10755.7	3566.67	6712.37	5337.82	4106.36	5802.49	2719.16	11593.5
K00413	CYC1, CYT1, petC; ubiquinol-cytochrome c reductase cytochrome c1 subunit	4090.75	5048.81	4057.87	7530.42	7981.83	9670.58	7771.41	6544.5	5662.37	4781.5	3959.82	4723.68	2795.73	4651.67	4858.74	3451.87	4480.5	4280.53	3985.7	2803.76	3644.54	4729.27	3365.55	9399.14	4599.42	5346.24	249.03	3345.66	5264.84	2058.5	3786.92	5067.42	5549.75	3086.75	9823	1868.5	5429.77	4223.95	3486.62	3532.99	2269.66	2565.54
K00423	E1.10.3.3; L-ascorbate oxidase [EC:1.10.3.3]	20	34.25	18	190	0	953	69	58	52.75	9.5	14.33	15.33	26.66	10.33	29	5.33	22	9.58	58	40.67	93.33	7	36	5	2	14.33	0	0	1	0	0	0	8	19	2	0	57.67	36.25	25.58	69.66	10.33	23
K00425	cydA; cytochrome bd ubiquinol oxidase subunit I [EC:1.10.3.14]	10421.4	11724.7	10818	14322.2	12840.7	17373.9	14874.4	12722	10726.5	13035.7	10588	12823	9075.02	12116.1	13822.2	10571.6	12057.2	13129.4	13450.9	8886.02	13894.6	11645.1	8804.67	18077.8	14448.3	15275.6	747.85	6625.15	8667.34	6139.6	9935.41	9635.31	10874.6	10856.7	15459.5	6403.67	15298.6	11909.5	8411.95	10711.7	6320.91	8425.67
K00426	cydB; cytochrome bd ubiquinol oxidase subunit II [EC:1.10.3.14]	10650.4	11935.8	11009.5	14501.1	12953.7	17837.1	15153.7	12973.8	10973.3	13404.5	10960.5	13123	9403.52	12342.6	14082.2	10880.8	12454.8	13470.4	14056.9	9301.02	14302.6	11823.8	9130.67	18302.3	14689.8	15548.1	763.02	6666.15	8861.84	6218.1	10220.9	9756.81	11168.6	11052.7	15867	6522.67	15652.6	12251	8619.45	11270.7	6536.41	8839.67
K00427	lldP, lctP; L-lactate permease	0.26	2.55	1.14	0	0.12	1.67	0	0	0	12.14	16.83	11.29	1.5	0.4	18.8	19.39	18.38	9.1	2.25	0	11.35	0	0.43	2	2.62	3.88	0	0	4	6.91	12.5	0.5	3	9.5	14.3	0	2.36	2.1	2.83	0.4	0	3.75
K00428	E1.11.1.5; cytochrome c peroxidase [EC:1.11.1.5]	8764.39	11210.9	8686.63	9696.46	13438.2	14618.9	10254.4	8914.54	7190.06	9277.01	8599.47	9645.54	5353.9	6286.83	6697.95	7704.62	10233.6	9870.65	8753.18	4652.66	6791.48	8204.4	6983.28	15056.3	9251.5	11394.7	415.85	5571.84	6877.82	3749.2	4562.83	6065.86	7401	4003.67	12269.2	2755.51	10101.3	9665.68	8808.94	5415.04	7066.66	5704.84
K00430	E1.11.1.7; peroxidase [EC:1.11.1.7]	0	0	0	0	0	3	10	5	5	0	1	0	0	0	0	0	0	0	0	0	0	0	0	0	0	0	0	0	0	0	0	0	0	0	0	0	0	0	0	0	0	0
K00432	gpx; glutathione peroxidase [EC:1.11.1.9]	4904.31	6480.87	5071.68	7169.23	6906.65	12141.4	6982.27	5816.93	5134.32	7542.77	7305.38	6946.58	4563.99	5531.21	6570.71	6473.15	8912.01	7573.44	6956.04	4152.68	6951.17	6002.38	4287.93	10525.8	6747.15	7292.4	303.26	3724.83	3908.17	3074.77	5075.28	5855.87	6980.92	4442.52	10632.4	2946.84	7511.22	7110.18	5218.88	5243.97	3210.87	4963.51
K00433	cpo; non-heme chloroperoxidase [EC:1.11.1.10]	274.27	462.07	277.15	27.92	130.37	381.83	113.45	84.92	82.58	114.51	144.2	175.03	429.41	196.03	290.84	91.12	160.47	157.17	110.59	277.58	90.17	150	79.77	80.34	628.11	910.2	23.5	279.49	236.34	252.4	183.03	107.17	439.34	98	598.42	118	233.22	189.5	208.33	61.17	81.33	118.23
K00435	hemQ; Fe-coproporphyrin III decarboxylase [EC:1.11.1.-]	123	121.99	93.5	148.52	161.5	309.33	181.83	134.74	102.73	1387.25	1800.75	984	590.24	191.68	299.74	1379.5	2590.17	1394.33	1255.49	287.01	634.57	62.24	161.74	216.66	126.75	132.25	11	272.5	105.67	186.51	198.25	116.42	168.75	256.26	255.74	35.5	456.49	518.5	481.34	159.75	133	279.5
K00436	hoxH; NAD-reducing hydrogenase large subunit [EC:1.12.1.2]	136.67	172	140.17	69	42.33	113.5	159.5	150	99.5	126.17	137.67	129	59.25	106	132	107.33	139.33	122.5	161.25	98.25	169.67	189.5	153.5	113	259.33	399.17	12	153	84.5	51.5	139	95.83	87.33	91.33	25.5	92	278.08	339.83	78.5	159.5	85.5	153.83
K00437	hydB; [NiFe] hydrogenase large subunit [EC:1.12.2.1]	213.5	247.5	143.5	44.5	109.5	92	145.5	139.5	109	219.5	188.5	199.5	474.5	179	572	160	211	175.5	954	265	1142.5	72.5	142.5	57	162	173.5	9	47.5	98	93	578.5	215.5	65	429	92.5	106	1585.5	853.5	350.5	109	60	123.5
K00440	frhA; coenzyme F420 hydrogenase subunit alpha [EC:1.12.98.1]	1	1	0	0	0	0	1	2	0	12	5	3	4	1	0	6	4	5	4	0	4	0	1	0	0	0	0	0	0	0	0	0	0	10	13	0	15	14	6	0	0	0
K00441	frhB; coenzyme F420 hydrogenase subunit beta [EC:1.12.98.1]	1902.17	1691.58	2224.51	3595.83	1673.42	3332.83	4033.17	3539.92	2904.42	1802.66	1768.01	2358.25	1620.25	2399.34	2490.41	1384.91	1932.23	2555.41	2693	2052.75	2179.01	1502.83	1786.34	1352.25	2232.58	2039.42	144.33	1280.5	1212	1490.5	2482.34	1605.83	1851.41	2128.08	2009.25	953.5	2161.08	2493.83	1666.09	3099.5	1439.5	2196.08
K00442	frhD; coenzyme F420 hydrogenase subunit delta	0	3	1	1	0	0	2	7	1	1	1	3	2	0	2	2	9	7	6	0	3	0.5	10	0	3	3	0	0	9	0	0	0	0	0	0	11	0.5	1	1	0	0	0
K00443	frhG; coenzyme F420 hydrogenase subunit gamma [EC:1.12.98.1]	1	1	0	0	0	0	1	2	0	12	5	3	4	1	0	6	4	5	4	0	4	0	1	0	0	0	0	0	0	0	0	0	0	10	13	0	15	14	6	0	0	0
K00446	dmpB, xylE; catechol 2,3-dioxygenase [EC:1.13.11.2]	365.83	686.33	344.5	1472.5	472	3064	1795.5	1562	1194	768.33	558.5	609.83	291.5	301.5	354	748.66	712.33	655.5	568.33	531	696	451	633.83	932.5	1518.5	1962	25	220	396	155	243.5	386.5	182	120	331	125	1201.08	996.33	572	563	268	204.17
K00448	pcaG; protocatechuate 3,4-dioxygenase, alpha subunit [EC:1.13.11.3]	1310.26	1152.68	1179.51	1216.67	1573.95	2537	1448.83	1274	989.17	716.5	829.02	823.7	843.7	698.17	730.66	686.5	881	803.5	1243.83	598.34	589.5	577.6	462.24	756.17	1711.46	2178.71	48.53	814.66	912.67	313.88	423.17	452.5	322.67	326	842.5	277	1254.4	913.03	710.32	403.5	436	372.66
K00449	pcaH; protocatechuate 3,4-dioxygenase, beta subunit [EC:1.13.11.3]	2294.25	2166.01	2165.68	1622.66	3492.45	3396.65	2057.32	1763.16	1425.17	1598.67	1629.84	1840.2	1465.79	1343.17	1546.49	1542.49	1942.66	2059.32	2372.25	1225.92	1819.01	1525.6	1419.07	1412.68	2547.95	3691.38	71.36	1017.66	1102.84	666.21	883.67	1058.84	914.84	564	1192.83	612.5	2056.3	2019.86	1790.32	1564.83	851	1054.83
K00450	E1.13.11.4; gentisate 1,2-dioxygenase [EC:1.13.11.4]	59.04	57.63	80.71	97.67	19.95	145.58	79.75	86.25	55.42	116.64	94.98	117.58	116.2	264.17	299	111.96	98.39	153	137.59	114.09	363.75	96.6	146.98	79.59	610.63	919.71	24.53	115.99	73.34	209.38	33.67	15.5	110.84	173.5	586.5	573	357.86	149.03	104.12	109.75	53.5	131.83
K00451	HGD, hmgA; homogentisate 1,2-dioxygenase [EC:1.13.11.5]	2576	3136.71	2428.11	4984.33	4349.33	5509.91	4080.84	3620.74	2977.86	3649	4022.06	3357.53	2553.55	3128.01	3349.67	3317.21	4833.24	3627.62	3461.04	2227.67	3217.88	1690.26	1702.71	5392.13	2393.92	3606.83	152.7	2013	1934.5	1350.5	2886.75	2908.92	2205.09	2702.92	2270.82	2198.67	3619.01	3439.36	2395.52	1705.66	1571	2585.88
K00452	HAAO; 3-hydroxyanthranilate 3,4-dioxygenase [EC:1.13.11.6]	247.25	313.83	328.75	243.17	206	493.83	339.75	289.08	233.66	949.66	1240.83	739.5	311.91	182.01	267.08	940.91	1724.75	1027.5	570.58	233.17	376.83	176.58	151.83	237.33	154	165.08	18	441	284.5	201	199.5	95	208.67	378.67	259.41	107	543.99	676.58	513	176	156.5	250.5
K00453	TDO2, kynA; tryptophan 2,3-dioxygenase [EC:1.13.11.11]	1791.49	2245.09	1627.11	2693	2632.66	3832.75	3523.34	3056.6	2497.99	2794.16	3171.31	2549.28	1614.74	2046.62	2246.57	2703.75	3941.33	3075.75	2239.19	1750.51	2415.92	1041.01	1126.13	2389.58	1788.17	2459.41	115.03	2016	1586.33	1204	1741.17	1465.67	1480.67	1942.11	1208.51	1606.17	3036.73	2787.52	1891.86	1395.75	1055	2049.06
K00455	hpaD, hpcB; 3,4-dihydroxyphenylacetate 2,3-dioxygenase [EC:1.13.11.15]	104.26	164.51	91.84	3	7.12	112	10	6	11	65	82.52	91.2	28.2	21.4	30.8	79.1	95.1	80.1	8	35	14.1	18.1	28.23	7	33.62	58.38	3.2	61	48	19.58	31	21.5	18	215	191.3	66	183.47	113.3	128.82	14.4	0	8
K00456	CDO1; cysteine dioxygenase [EC:1.13.11.20]	5.5	14	9	67	9	138.5	49.5	32	22	20.5	18	26	86	42	21	15.5	20.5	20	115	12.5	26	17.5	6	11	37	32	5	27	7	54.5	39	34.11	24.5	246	29.66	8	39.5	72.5	16.5	6	8.38	3
K00457	HPD, hppD; 4-hydroxyphenylpyruvate dioxygenase [EC:1.13.11.27]	3198.92	3903.36	3000.29	5868.83	4880.44	6690.91	5063.33	4420.57	3690.2	4181.01	4549.74	4558.73	3467.18	3880.85	4629.32	3810.54	5396.72	5302.78	4837.7	3005.76	4882.47	2166.52	2056.79	5875.47	3642.37	5302.38	196.89	2437.16	2296.67	1786.38	3554.59	3316.09	3060.75	3522.75	2557.15	2581.17	4370.9	4175.88	2739.85	3020.16	2111	3442.12
K00459	ncd2, npd; nitronate monooxygenase [EC:1.13.12.16]	3600.08	3721.34	3360.12	3608.98	4101.45	7777.07	4292.51	3638.78	3056.75	3236.93	3107.38	3365.91	2667.62	4338.83	5167.22	2400.03	3453.03	2932.61	4112.5	2409.26	4671.07	3274.39	2600.31	3174.01	7617.3	9398.78	181.92	2530.32	2955	1651.01	2813.58	3986.36	5026.09	2630.28	2785.36	1477.5	5577.74	3875.07	2752.46	3796.56	1314.53	2537.5
K00461	ALOX5; arachidonate 5-lipoxygenase [EC:1.13.11.34]	0	0	0	0	0	0	0	0	0	0	0	0	1	0	0	0	0	0	0	0	0	0	0	0	0	0	0	0	0	0	0	0	0	0	0	0	0	0	0	0	7	0
K00462	bphC; biphenyl-2,3-diol 1,2-dioxygenase [EC:1.13.11.39]	0	0	0	0	0	0	0	0	0	0	0	0	0.75	0	0	0	0	0	1.25	0.25	0	0	0	0	0	2	0	0	0	0	0	0	0	0	0	0	1	2	4	0	0	0
K00463	IDO, INDO; indoleamine 2,3-dioxygenase [EC:1.13.11.52]	2	4	6	3	5	5	10	9	8	13	3	2	6	8	7	10	8	11	6.5	11	11	7	12	0	7	4	0	6	50	0	1	2	12	54	0	9	33	7	8	4	19.5	17.5
K00464	diox1; all-trans-8'-apo-beta-carotenal 15,15'-oxygenase [EC:1.13.11.75]	289.17	276	342.67	571.5	146.83	445	454.5	378.5	308.5	264.67	252.67	816.5	305	228	389.5	250.83	254.33	1288.5	433.5	304	494.67	255.5	209	171	361.83	467.17	3.5	118	130	103.5	195	115.83	173.66	563.48	284	272.5	388.83	425.33	148	330	233	335.33
K00466	iaaM; tryptophan 2-monooxygenase [EC:1.13.12.3]	20	15	24	0	6	6	1	1	1	10	8	17	9.5	15	7	5	19	19	11.5	11	12	17	26	29	2	16	1	7	9	0	113	261	47	8	12	0	11	4	6	18	0	0
K00467	E1.13.12.4; lactate 2-monooxygenase [EC:1.13.12.4]	3.33	1.33	1	0	0	0.33	4	1	2	16	27	16.33	4	0	18	19.33	26.33	9	19.33	0	2	1	4.33	0	11	0.33	0	3	0	12.33	0	0	7.67	0	20	0	16.33	7	13	0	1	4.67
K00469	MIOX; inositol oxygenase [EC:1.13.99.1]	22.33	8.33	33	65.33	12	57.99	49.33	39.33	36.17	61.5	87.66	56.5	20.67	23	44	81.83	133	135.16	38.5	65.5	36.34	52.17	10	15	16	20	1	67	41	20.33	18	1	10.34	9.33	1	23	62.16	175.17	66.5	48.33	37	0
K00471	E1.14.11.1; gamma-butyrobetaine dioxygenase [EC:1.14.11.1]	177.16	137.84	124.67	142.17	188.33	186.67	180.83	168	143.5	155	164.83	133.16	941.17	195.17	356.49	144.5	169.83	146.5	1865.83	592.34	731	71.17	255.5	73.67	176	156.16	7.33	102.33	106	103.5	210.67	174.5	167.33	10.5	179.83	49	270.25	276.33	223	365.5	287	122.16
K00472	P4HA; prolyl 4-hydroxylase [EC:1.14.11.2]	140	210	123	32.5	23	151	78.5	52.5	44.5	188.75	258.5	134.62	66.62	51.5	106.5	185	301.5	158.75	118.12	84.5	105.88	23	78	6	52	59	4	91.5	77	39	42	10	38.5	68	101	76	183	141.5	138	58.5	43	69.88
K00476	ASPH; aspartate beta-hydroxylase [EC:1.14.11.16]	34	55	11	1	6	1	3	1	1	13	20	17	2	1	0	11	24	11	8	30	2	1	13	2	13	6	4	6	1	0	5	0	6	0.5	0	1	20.17	18	24	0	40	4
K00477	PHYH; phytanoyl-CoA hydroxylase [EC:1.14.11.18]	142.92	238.08	163.67	70.5	32	172.08	57.75	44.75	43.5	142.5	160.08	154.42	55.08	126	97.67	144.5	213.08	206.75	96.17	146.5	135.25	370.5	149.67	46.42	440.92	528	3.5	121.33	110.17	44	239	121.5	51.67	60.5	28.5	65.5	359.42	311.75	152	117.25	88.5	182.5
K00479	gbcA; glycine betaine catabolism A	311.83	324.44	291.7	389.67	220.33	960.67	217.33	224.75	191.42	373.75	242.82	337.53	516.62	246.67	353.57	195.5	209.17	283	912.16	411.84	378.75	212.35	330.39	273	327.92	219.58	26.53	243.83	334.5	243.8	360.42	702.25	264.25	434.25	1621	551.5	309.65	368.53	258.2	212.92	317.5	139.66
K00480	E1.14.13.1; salicylate hydroxylase [EC:1.14.13.1]	1495.12	1318.2	1393.68	1819.84	1970.28	2519	2106	1872.5	1468.59	1016.47	1154	1161.13	852.59	1317.34	1504.66	976.46	1245.98	1189.75	980.59	627.93	1119	705.5	603.52	1214.84	1471.3	2498.04	69.66	1447.82	1196.34	508.18	637.34	858.5	922.17	890.33	1139.5	542	1504.96	1162.24	886.09	679.83	571	498.16
K00481	pobA; p-hydroxybenzoate 3-monooxygenase [EC:1.14.13.2]	1652.09	1562.35	1482.34	1121.67	1815.95	1762.67	1612.83	1445.5	1128.67	1211.33	1211.52	1302.53	622.87	1127.17	946.49	1033.83	1333.67	1291	780.66	491.34	597	782.1	702.57	1434.5	1582.79	2622.21	62.03	922.83	1152	409.88	893.67	1113.5	762.5	779.5	771.5	1099	1530.4	1211.86	1011.82	542.5	392	739.66
K00483	hpaB; 4-hydroxyphenylacetate 3-monooxygenase [EC:1.14.14.9]	254.54	482.12	253.5	419.5	289.62	312	526.5	455	314.5	683.17	445.64	515.86	228.7	237.9	296.3	642.26	556.09	553.1	487.83	428	534.6	402.27	545.39	701.5	833.12	1154.88	16.2	99	239	67.58	100.5	136.11	201.5	254.5	158.3	57	1007.63	716.63	412.94	520.4	258.88	244.67
K00484	hpaC; flavin reductase (NADH) [EC:1.5.1.36]	15.26	12.68	23	188	33.12	777.67	21.33	15.5	12.5	9.17	12.02	22.7	8.53	1.9	6.3	10.93	13.76	14.6	10.16	14.5	4.1	47.1	19.73	50	577.29	844.38	4.2	23	0	9.58	93	245.5	42.83	0.5	27.3	0.5	10.88	24.8	10.15	9.4	6	3.83
K00485	FMO; dimethylaniline monooxygenase (N-oxide forming) [EC:1.14.13.8]	0	0	0	0	0	0	0	0	0	1	0	0	0	1	0	0	0	0	5	14	2	0	0	0	0	0	0	0	0	0	0	0	0	4	0	0	1	0	0	6	0	5
K00486	KMO; kynurenine 3-monooxygenase [EC:1.14.13.9]	470.25	819.33	481.25	2894.67	2375.5	2004.83	1386.75	1223.58	985.66	1554.83	1885.83	1286	700.91	882.01	964.58	1516.58	2449.25	1637	1102.08	458.17	806.33	466.08	419.33	3137.33	396.5	360.08	38.5	682	471.5	440.5	1173	1116	746.5	652.67	393.41	185	833.16	1063.75	789.5	335.5	785	786
K00491	nos; nitric-oxide synthase, bacterial [EC:1.14.14.47]	57.66	72.16	74.08	84.5	28.5	77	102	76.11	49.83	91.75	113.5	78.74	44.05	24.27	68.33	77.08	139.66	89.25	29.19	64	72.42	62.17	67.16	31.5	71.5	71.5	16	66	94	46	45.5	42.11	141	392.44	44.61	12	183.13	142.75	106	47	16.38	114.23
K00493	E1.14.14.1; unspecific monooxygenase [EC:1.14.14.1]	570.33	541.33	454.5	79	1231	244	38	42	25	250.5	348	307.33	175	433	351	290.33	444.83	324.5	238.33	115	166.5	77	118.83	245	145	230	12	475	462	45	43	37	41.83	165.66	226.5	128	637.09	312	277	95	219	47.67
K00496	alkB1_2, alkM; alkane 1-monooxygenase [EC:1.14.15.3]	2566.67	2452.2	2429.73	3710.5	3352	5548	4215	3738	2899	1659.5	2099.3	1719.89	1594.72	2066.66	2156.33	1619.33	2388.67	1696.16	1850.83	1065.84	1480.66	790.2	1064.6	2040.5	899	2077.16	106.9	1775	1698	636	616	860	723	1425.5	1412.5	834	2381.89	1972.07	1737.23	985.32	1440.49	701.5
K00499	CMO; choline monooxygenase [EC:1.14.15.7]	37.5	77.5	38.5	16	8	16	15.5	15.5	7	162	210.5	109.5	12	16	16.5	165	224	130.5	16	18	47.5	76	71	73	59	18	0	43	29	16	30.5	18	74	33.5	91.25	33	133.67	179.5	137.5	11	29.5	32
K00500	phhA, PAH; phenylalanine-4-hydroxylase [EC:1.14.16.1]	1039.75	1368.3	1084.45	2817.67	2550.5	2948.83	1899.08	1616.33	1404.11	2041.16	2636.81	1951.27	1397.31	1508.95	1749.83	1960.2	3287.67	2238.95	2023.2	920.17	1777.46	978.43	828.71	3530.88	921.25	841	60.7	825	718.67	470.17	1585.75	1510.42	1378.25	1145.92	538.66	402.5	1788.36	2147.7	1331.79	664.58	613.5	973.88
K00504	PAM, PHM; peptidylglycine monooxygenase [EC:1.14.17.3]	0	0	0	1	0	0	1	0	0	0	0	0	0	14	0	0	0	0	0	0	0	0	0	0	0	0	0	7	0	0	0	0	3	0	0	0	1	0	0	0	0	0
K00505	TYR; tyrosinase [EC:1.14.18.1]	0	2	1	1	0	4	8	3	2	5	1	9	3	6	26	3	0	12	0	0	1	10	1	14	26	1	1	0	0	17	0	13	0	10	154	42	8	4	1	0	0	13
K00507	SCD, desC; stearoyl-CoA desaturase (Delta-9 desaturase) [EC:1.14.19.1]	4062.41	5298.09	4200.97	8948.38	8474.32	9013.74	7241.27	5994.56	5273.44	5710.61	4840.12	6523.51	3320.74	5298.02	5525.85	4411.54	5442.13	7290.2	4823.38	3731.91	4730.15	5878.22	3841.66	12026.5	5860.57	5967.67	255.16	3181.51	3731.49	2155.99	5727	6102.85	6112.83	4096.16	9583.87	2917.18	4984.72	5030.38	3647.87	3826.08	2410.33	4013.55
K00508	E1.14.19.3; linoleoyl-CoA desaturase [EC:1.14.19.3]	754.25	1245.93	822.45	1697.17	982	2485.07	1958.25	1642.08	1406.91	1906.83	2232.06	1552.2	910.11	698.18	1068.58	1870.91	2871.75	2049.75	1404.08	1004.67	1550.83	513.68	504.63	1324.83	529.5	693.57	70.7	1388	872.5	834.99	1061.5	623	811.01	1220.17	724.83	532.5	1509.89	1867.45	1217.7	1040	776.5	1345.5
K00510	HMOX1; heme oxygenase 1 [EC:1.14.14.18]	304.92	295.83	322.26	568.84	145.16	393.75	426.75	356.08	285.91	225.34	207.84	790.5	361.58	285.67	418.91	203.74	215.41	1243.25	557.58	615.67	583.67	189.25	216.5	121.83	306.99	467.59	8.5	229	144	213.67	208	110.16	101.32	559.33	307.49	270.5	367.49	455.41	140.67	441.17	309	405.66
K00511	SQLE, ERG1; squalene monooxygenase [EC:1.14.14.17]	1	0	1	0	0	0	0	0	0	1	1	0	1	1	0	0	2	0	5	16	2	4	0	0	0	0	0	8	0	0	2	0	0	4	4	2	1	0	0	7	14	5
K00514	ZDS, crtQ; zeta-carotene desaturase [EC:1.3.5.6]	36.5	35.33	53.67	43.83	11.83	71.66	105.83	98.83	67.17	46.17	55.83	54	8.67	14	17.5	48.66	42.33	50.66	16.5	15	13.51	87.17	53	43	184.83	327.84	0.5	59	21	2.5	22	8.83	18.33	7.83	0	4.5	183.16	297	34	30.83	54	17.33
K00515	BCMO1, BCDO1; beta-carotene 15,15'-dioxygenase [EC:1.13.11.63]	89.66	90.33	101.97	121.33	73.01	101.67	152	133.66	138.67	948.67	460.99	865	174.33	509.99	485.99	997.99	619.64	1427.67	219.99	32	183.68	60	120.65	109.33	124.01	183.66	5.99	326.66	100.33	73	97.66	206.33	198.33	412.65	54.66	82.66	863.65	659.64	181.67	76.99	65	102
K00517	CYP81F; indol-3-yl-methylglucosinolate hydroxylase [EC:1.14.-.-]	3353.74	3090.9	3090.49	3084.81	3963.32	3188.5	1705.61	1476.72	1229.48	3014.01	3384.54	3042.67	1858.56	2452.35	2369.76	2798.89	4241.8	3540.95	2973.93	2180.84	2499.34	1979.5	2131.12	4215.5	5060.34	6620.08	120.2	1383.01	1162.99	858.97	2401.5	3111.18	1899.83	2179.5	996.14	1625.68	3073.81	2385	2244.99	2169.66	960.83	1677.67
K00518	sodN; nickel superoxide dismutase [EC:1.15.1.1]	400.17	398	414.17	200.5	105.83	372.33	388.83	353.5	305.5	603.17	501.67	645	365.5	644.17	534.5	474.33	582.5	635.83	416.5	552	485.5	655.5	410.5	779.67	864.83	1177.67	35.5	250	297.17	186.5	649	676	665.33	276	194.5	877.5	559.5	664.83	276.84	555	259	798.33
K00520	merA; mercuric reductase [EC:1.16.1.1]	815.25	1436.73	774.72	1260	776.84	3019.33	1270.58	1020.91	940.49	1336.83	1063.1	1188.13	849.54	691.4	1123.21	922.01	1163.01	1028.92	1103.08	925.68	1598.76	871.81	637.7	1725.16	473.67	487.91	41.3	506	419	461.37	684.17	562.17	559.5	846.67	627.13	467	1021.5	1176.65	773.63	1064.22	398.16	969.84
K00523	ascD, ddhD, rfbI; CDP-4-dehydro-6-deoxyglucose reductase, E3 [EC:1.17.1.1]	1976.26	2911.55	1775.52	3412.83	4738	5010.58	1894.25	1591.16	1401.54	2455.58	2070.56	2528.79	1462.1	2252.49	2099.74	1767.67	2465.24	2358.08	2248.4	1365.59	1588.84	2097.18	2101.05	6509.96	1734.76	1917.4	126.03	1470.16	3129.5	912.33	2208.08	2314.92	1684.59	1362.57	8014.24	699.5	3216.88	2672.77	2340.7	1511.32	1422.49	1429.66
K00524	nrdJ; ribonucleotide reductase, class II [EC:1.17.4.1]	2	2	4.5	3	0	0	0	0	0	1	1.5	2.5	0	0	0	1	1	1.5	1.5	0	0.5	1	3	1	0	2.5	0	0	0	0	12.5	0	0.33	3.16	0	0	12	0.5	3	0.5	0	1
K00525	E1.17.4.1A, nrdA, nrdE; ribonucleoside-diphosphate reductase alpha chain [EC:1.17.4.1]	24090.8	24995	24951.6	28512.2	22470.2	39105.3	34958.6	29910.5	25213.4	28141.2	23431.1	26994.8	20565.6	24665.7	27922	23544.2	27445.6	29069.8	29979.8	20258.6	29917.8	21377.6	20671.2	29480.6	24107.7	23849	1509.16	14718.1	18163.4	12808	22139.8	18062	22486.7	24390.3	33420.1	14633.2	33386.1	29430	18933.4	26560.3	14348.7	26073.3
K00526	E1.17.4.1B, nrdB, nrdF; ribonucleoside-diphosphate reductase beta chain [EC:1.17.4.1]	8737.48	9998.19	8780.86	13557.2	10216.5	18322.7	16084.5	13591.2	11752.9	13217.3	11342.3	12657.1	9358.81	10614.3	11808.7	11173.4	13372.5	14309.1	14131.9	10106.1	12421.7	9939.84	9281.5	15893	12403.5	13340.2	700.85	6496.66	8550.17	6435.09	9970.62	8898.54	11298.2	11773.3	17219.4	8020.67	14139.1	12835.2	8387.3	12660.1	6997.2	9563.97
K00527	rtpR; ribonucleoside-triphosphate reductase (thioredoxin) [EC:1.17.4.2]	4626.84	3372.79	5710.92	4906.84	3925.12	6134.74	8920.79	7735.54	6452.73	4453.94	2611.86	4329.26	2449.33	3542.03	4123.31	2574.97	2669.62	3047.01	3552.82	1942.3	3843.95	4292.44	3877.48	4670.81	2960.48	2658.34	264.44	1785.83	2241.24	2214.71	2414.03	2167.51	2016.17	2898.79	1484.47	1364	4885.88	3788.56	2554.5	3711.41	1286.25	2448.05
K00528	fpr; ferredoxin/flavodoxin---NADP+ reductase [EC:1.18.1.2 1.19.1.1]	12656.5	13074.4	13398.2	12746.2	11628.8	17460.9	14809.8	12787.3	10746.2	13903.4	10442	13558.4	9527.8	12320.2	13728.4	10615.2	12278.5	12831.4	13893.7	7670.31	13220.3	11667.2	10016.3	13355.8	14539	13548.8	569.56	4808.16	6515.17	5026.41	10913.1	8488.92	11230.6	8937.25	6868.95	5121.84	16096.9	13329.4	8802.08	12204.9	5661.49	13982.3
K00529	hcaD; 3-phenylpropionate/trans-cinnamate dioxygenase ferredoxin reductase component [EC:1.18.1.3]	4886.12	4307.36	4525.64	5285	3649.63	6246.5	5047	4464.99	3715.92	3620.33	3342.28	3859.96	4190.82	5434.55	5920.97	3102.7	3828.98	4302.47	4343	2534.17	5006.44	3131.5	3209.49	3886.67	6709.64	8131.87	365.99	2306.82	3154.17	3009.88	2987.16	3181.33	3350.83	5721.48	4324.13	5286.99	3595.68	3340.15	2363.2	3987.21	1891.66	6670.67
K00532	E1.12.7.2; ferredoxin hydrogenase [EC:1.12.7.2]	7	1	2.5	0	0	0	0	1	1	0	0	0	0	0	0	0	0	0	0	4	0	0	1	0	0	0	0	11.5	0	0	0	0	0	0	0	0	0	0	1	0	0	0
K00533	E1.12.7.2L; ferredoxin hydrogenase large subunit [EC:1.12.7.2]	305	384.83	562.33	892	1212	924	668.5	634	475	814.67	244	733.33	114	349.67	309.67	563	209	615	107	184.67	173.67	954	908	845	315.5	215	18	146	241	247	811	203	229.67	31	55	47	963.58	442	141	299	103.33	209.33
K00534	E1.12.7.2S; ferredoxin hydrogenase small subunit [EC:1.12.7.2]	7	25.5	9	6	13	16	90.5	72	69	66	60	71	22	21	43	32	66	45	38	50	43	10	11	24	80.5	10	3	1	48	70	558	141	58	54	8	0	51	55	50	28	0	7
K00537	ARSC1, arsC; arsenate reductase [EC:1.20.4.1]	6349.17	8036.61	6547.18	7455.33	10630.1	12138.9	7528.74	6364.09	5370.5	8920.74	8775.87	8296.74	5052.19	6880.86	7674.33	7515.44	10927.2	8870.97	7809.04	3878.85	6673.75	6109.36	4940.14	10710.5	6607.59	8077.41	414.23	4948.33	6551.67	3243.06	5549.91	6822.32	7716.08	5988.19	12353.9	2816.51	8708.53	7190.59	5995.47	4607.54	3531.53	4276.34
K00543	ASMT; acetylserotonin O-methyltransferase [EC:2.1.1.4]	0	0	0	0	0	0	0	0	0	0	0	0	0	0	0	0	0	0	0	0	0	0	0	0	0	0	0	6	0	0	0	0	0	0	0	0	0	0	0	0	0	0
K00544	BHMT; betaine-homocysteine S-methyltransferase [EC:2.1.1.5]	7	8	13	2	0	0	0	0	0	10	10.5	4	0	0	18.33	10	19	2	0	2	1	5	11	0	0	0	0	0	2	0	0	0	28	0	1	0	13	9	12	0.67	0	6
K00545	COMT; catechol O-methyltransferase [EC:2.1.1.6]	1	1	1	0	0	0	1	0	0	0	0	0	0	0	0	1	0	0	2	0	0	0	0	0	0	0	0	0	0	0	0	0	0	0	4	0	0	0	0	0	0	0
K00547	mmuM, BHMT2; homocysteine S-methyltransferase [EC:2.1.1.10]	1277.08	1299.03	1596.79	732.33	417.98	1280.67	960.04	783.38	633.33	1376.35	1064.52	1340.68	1154.6	1076.61	1288.29	826.73	1108.37	1020.1	2203.14	803.51	1453.76	1867.67	1077.26	1396	1131.89	400.91	34.83	350	458.33	420.18	696.37	629.89	808.67	696.88	1163.68	397.17	1447.72	1140.09	852.27	1809.9	1043.59	1406.93
K00548	metH, MTR; 5-methyltetrahydrofolate--homocysteine methyltransferase [EC:2.1.1.13]	18406.9	19218.2	19323.7	21448.7	18003.6	25447	22328.6	19211	15862.9	19436.5	16341.5	18899.1	13523.6	18406.5	20768.1	15567.9	19120.7	18775.2	20080.7	11523.5	20142.8	15754.3	13408.4	19752.5	17725.4	18489.8	872.48	10178.2	12204.3	7802.16	14766.9	12277.1	15139.2	13262.8	17499.5	7553.59	22521	19861.8	12763.5	17777.4	9479.03	18609.5
K00549	metE; 5-methyltetrahydropteroyltriglutamate--homocysteine methyltransferase [EC:2.1.1.14]	10873.9	10765	11109.8	9118.08	9830.26	17050.6	14026.8	12075.1	10142.5	14126.9	11267.1	13867.1	10996.3	12370.6	14087.4	12247.9	13280.5	16410.4	16180.8	12197.7	16472.2	11402.5	11693.2	13579.8	16869.1	18167.9	936.17	7944.97	9755.67	8406.1	10849.6	8572.14	12537.3	14892.9	21056.5	10538.6	18745.1	15508.3	10704.5	16065.4	8012.12	11837.8
K00554	trmD; tRNA (guanine37-N1)-methyltransferase [EC:2.1.1.228]	14932.5	16495.7	15740.5	19924.4	15972.4	23466.5	21555.5	18405.8	15482.4	16646	13479.9	16238.4	11253	14634.3	16441.8	12982.2	15531.9	16056.6	16535.7	10167.8	16383.9	13789.1	11746.3	19862.8	15372.1	14906.6	777.48	8249.16	10656.8	6776.26	13918.1	11325.9	13823.6	12045.1	15753.2	6632.09	18186.9	16889.5	10433.6	14018.1	8133.58	16534.4
K00555	TRMT1, trm1; tRNA (guanine26-N2/guanine27-N2)-dimethyltransferase [EC:2.1.1.215 2.1.1.216]	3993.83	3491.24	4060.31	3333	2430.76	6251	6407.17	5582.91	4673.59	5255.5	4221.33	4987.25	4397.75	4626.99	5323.41	4936.9	5002.21	6251.75	6001.16	4664.75	6405.85	3666.83	4393.32	3769.08	5469.09	5317.58	380.32	2523.66	2588.83	3359	3815.33	2631.66	3909.41	6209.4	5514.41	4165.49	6412.23	5898.97	3737.59	7189.82	3012.83	5194.92
K00556	trmH; tRNA (guanosine-2'-O-)-methyltransferase [EC:2.1.1.34]	2125.01	2930.53	2015.38	2701.17	3329.45	5696.17	3723.75	3103.74	2701.81	4160.24	4088.16	3872.07	2436.51	2142.35	2998.38	3953.8	5255.28	4679.51	3784.61	2033.01	4225.9	1784.24	2143.08	2821.33	1919.46	2517.29	94.5	1429.5	1170.5	1314.58	2288.99	1347.67	1850.67	2186.01	1306.29	1102.84	5238.85	5135.01	3054.32	2332.4	1689.99	2368.29
K00557	trmA; tRNA (uracil-5-)-methyltransferase [EC:2.1.1.35]	372.26	562.86	335.17	742.17	360.62	1296.51	863.49	721.42	568.7	774.65	479.32	541.6	653.16	328.57	507.54	708.55	562.21	561.68	1379.77	624.92	1054.15	481.85	676.65	781.05	434.8	395.79	11.53	207.66	278.67	151.91	311.41	255.92	295.75	324.92	145.39	70.67	1071.83	816.8	451.37	710.82	477.16	276.79
K00558	DNMT1, dcm; DNA (cytosine-5)-methyltransferase 1 [EC:2.1.1.37]	5237.35	5795.2	5480.64	6363.04	5317.67	8841.78	6868.12	5884.91	4847.33	5301.8	4878.94	7388.68	4314.02	4841.43	5625.92	4543.05	5586.43	9162.21	6329.94	4204.8	6159.26	4685.85	3886.36	4426.69	4933.31	6266.21	269.71	3010.49	2932.96	2274.84	4125.79	4909	6476.61	6563.8	3515.16	3275.08	5219.56	6257.12	4058.22	4783.53	3257.24	4404.34
K00559	E2.1.1.41, SMT1, ERG6; sterol 24-C-methyltransferase [EC:2.1.1.41]	13	5	4	0	1	0	0	0	0	1	3	2	3	0	0	1	1	2	10	1	0	3	11	0	0	0	0	4	0	0	0	0	3	0	1	3	8	7	0	0	0	0
K00560	thyA, TYMS; thymidylate synthase [EC:2.1.1.45]	7401.9	7910.15	7444.88	10743.2	10292.7	14340	12065.3	10094.5	8824.89	10845.4	9235.77	10292.6	6055.95	9639.72	10112.1	9127.15	11125	11195.2	8531.96	5941.18	8185.28	7890.02	6598.24	12230.6	7942.82	8232.32	440.36	5871.99	6755.34	4059.81	6607.78	7397.31	8744.68	9064.64	14057.5	5287.67	11162	9656.8	7001.31	6850.06	4116.08	5624.66
K00561	ermC, ermA; 23S rRNA (adenine-N6)-dimethyltransferase [EC:2.1.1.184]	15.5	24.83	32.5	5	16	4	82	55	41	38.5	50.25	55.75	51	68	41.33	36.83	97.33	83	103.25	266.5	90.75	17.5	6	7.5	27	38	9	41.5	79	50	45	13	52	7.5	36	13	24	16	19	91.67	26	70
K00563	rlmA1; 23S rRNA (guanine745-N1)-methyltransferase [EC:2.1.1.187]	356.4	358.92	370.13	466.58	147.61	1324.92	694.45	584.4	548.24	494.76	399.94	561.16	448.49	636.27	628.04	366.92	515.12	604.04	630.44	561.51	793.65	501.36	377.4	658.38	513.98	752.07	22.53	265.33	323.17	201.51	662.03	609.78	554.33	398.86	334.3	912.17	397.99	466.05	295.31	546.06	396.54	740.19
K00564	rsmC; 16S rRNA (guanine1207-N2)-methyltransferase [EC:2.1.1.172]	1793.9	1991.06	1658.82	2684	2267.28	4787.17	3140.61	2705.93	2133.27	1735.77	1579.51	1596.58	1551.27	1562.27	1961.58	1612.38	1833.3	1648.09	2538.49	1360.68	2446.41	1259.29	1356.69	1910.43	1348.32	2031.15	76.23	1143.16	1233.34	711.51	973.11	1006.87	1005.25	1262.72	1234.55	632.17	2517	1973.77	1382.01	1686.21	1259.53	943.96
K00566	mnmA, trmU; tRNA-uridine 2-sulfurtransferase [EC:2.8.1.13]	15375.4	16938.9	16127.3	20317.9	16292	24612.6	22151.7	18926.4	15986.1	17709.5	14466.4	17174.8	12138.8	15419.1	17388.1	14004	16849.9	17265.8	18018	11008.3	17423.4	14179.1	12175.5	20687.7	16178.9	15909.8	801.47	8556.32	11001.6	7165.26	14476.8	11657.2	14345.4	13033.5	16439.9	7009.58	18885.9	17475.1	10846.6	15008.9	8912.91	17235.4
K00567	ogt, MGMT; methylated-DNA-[protein]-cysteine S-methyltransferase [EC:2.1.1.63]	18236.6	19144.4	19110.2	22669.5	18011.1	28545.7	27114.6	23293.7	19650.7	20422.5	16513.4	19992.4	14897.9	18716.4	20943.8	16439.8	19087	20859.2	21261.4	14456.8	21419.6	16643	15352.3	22581.9	20562.5	20225.1	1151.47	10258.5	12734.1	10095.9	17371.4	13697.2	17356.3	17331.4	20913.4	10652.6	22847.3	20811.7	13375.4	19948.2	10211.8	21207.3
K00568	ubiG; 2-polyprenyl-6-hydroxyphenyl methylase / 3-demethylubiquinone-9 3-methyltransferase [EC:2.1.1.222 2.1.1.64]	5334.01	7087.18	5321.26	8916.75	9041.62	12386.2	9011.74	7626.5	6518.28	6363.65	5310.81	6308.14	3843.48	5360.4	5618.71	4738.92	6010.2	5840.54	5879.87	3736.34	4690.74	5920.94	4246.98	10228.8	6679.14	8127.62	373.03	3882.82	5788.51	2903.21	4973.41	6210.42	6839.92	3806.92	10076.9	2199.17	7953.82	6085.22	4873.2	4148.56	3245.99	3247.96
K00569	TPMT, tpmT; thiopurine S-methyltransferase [EC:2.1.1.67]	1849.25	2707.72	1583.45	3406.17	5185.83	4634.67	2069.08	1675.33	1542.03	2839.58	2840.15	2750.19	1651.61	2156.34	2230.65	2409.92	3571.09	3000.16	2575.99	1198.93	1929.58	1232.43	1757.05	6626.71	1603.59	1591.99	104.53	1488.83	1497.5	905.67	2108.58	2140.08	1619.75	972.92	8094.83	507.67	1864.31	2477.45	2109.2	1167.91	1004.66	1097.83
K00570	pmtA; phosphatidylethanolamine/phosphatidyl-N-methylethanolamine N-methyltransferase [EC:2.1.1.17 2.1.1.71]	867	826.67	925.83	908.5	624	1836	838.83	722.5	642	1243.5	912.5	1187.33	996.33	1578	1547	1000.83	950.83	1246	1022.66	857	1008	1580	971.5	1853	2583	3331	128	1796.5	3075	922.6	586	1064	1337	1270.5	8543	954	2789.08	1747.5	1021.33	1020	962	801.33
K00571	E2.1.1.72; site-specific DNA-methyltransferase (adenine-specific) [EC:2.1.1.72]	2050.24	2112.67	2341.73	2561.04	895.35	3010.41	2183.79	1778.16	1493.02	2973.99	2449.25	2953	2288.25	2459.67	2903.69	2772.2	2839.07	3719.02	3726.62	2733.29	3735.83	3086.39	1769.08	1561.97	3283.49	3600.73	86.99	1669.51	1427.49	1583.86	2921.2	1607.29	2474.32	2173.77	2015	1091.01	4097.56	2817.41	1596.79	3550.04	2327.88	3335.46
K00573	E2.1.1.77, pcm; protein-L-isoaspartate(D-aspartate) O-methyltransferase [EC:2.1.1.77]	21862.6	24407.8	22190.5	21947	25337.8	34160	28261	24317	20500.5	27128.6	22535.4	26187.3	18576.1	23660.4	25991.9	23014.5	26486.5	28269	26881	18638.6	26217	22348.6	20715.8	32029.1	28407	32009.8	1467	14219.3	18050	12739.3	18926.1	17920.9	23357.5	22028.9	32152	14200.3	31668.6	28548.2	19602.2	25109.9	13310.8	20361.1
K00574	cfa; cyclopropane-fatty-acyl-phospholipid synthase [EC:2.1.1.79]	8990.67	10994	8895.96	8767.15	13145.8	13710.9	9109.01	7755.7	6658.36	10477.6	8745.64	10647.1	6746.31	10098.2	10580	7538.17	9813.06	9604.04	10649.1	6597.85	9531.02	10148.7	7669.27	16102	11682.8	13996.5	575.38	6250.49	9799.99	3977.74	8500.32	9452.67	10180.7	5247.82	19795.9	4105.01	11935	10005.8	7974.49	8595.21	4672.47	7182.61
K00575	cheR; chemotaxis protein methyltransferase CheR [EC:2.1.1.80]	19183	18694.3	20409.9	17684.8	16266.4	24456.5	20680.1	18066.3	14934.3	19407.9	14391.4	19795	13296.9	18921.5	20880.8	14126.9	15931.6	18598.6	18822.8	11951.7	19658.1	19308.3	16810.2	21009.7	20950.2	20592.7	1064.36	9806.16	13998.1	8374.78	14033.7	13078.7	15648.5	16258.4	25610.4	9879.26	24407.4	20547.7	13297.4	18692.2	9284.57	19486.7
K00577	mtrA; tetrahydromethanopterin S-methyltransferase subunit A [EC:2.1.1.86]	11	6	7	0	3	26	21	13	16	36	29	11	22	11	13	16	36	16	74	60	41	43	1	8	5	9	2	26	0	46	0	2	20	2	4	3	162	17	23	265	3	180
K00578	mtrB; tetrahydromethanopterin S-methyltransferase subunit B [EC:2.1.1.86]	0.5	0	0	0	0	0	0	0	0	1	0.5	0.5	5	0	1.5	0.5	0.5	1	14	0	0	1	0	0	0	0	0	0	0	0	0	0	1	0	1	0	1	0.5	0	0	1.5	3.5
K00579	mtrC; tetrahydromethanopterin S-methyltransferase subunit C [EC:2.1.1.86]	0.5	0	0	0	0	0	0	0	0	1	0.5	0.5	5	0	1.5	0.5	0.5	1	14	0	0	1	0	0	0	0	0	0	0	0	0	0	1	0	1	0	1	0.5	0	0	1.5	3.5
K00580	mtrD; tetrahydromethanopterin S-methyltransferase subunit D [EC:2.1.1.86]	0.5	0	0	0	0	0	0	0	0	1	0.5	0.5	5	0	1.5	0.5	0.5	1	14	0	0	1	0	0	0	0	0	0	0	0	0	0	1	0	1	0	1	0.5	0	0	1.5	3.5
K00581	mtrE; tetrahydromethanopterin S-methyltransferase subunit E [EC:2.1.1.86]	0.5	0	0	0	0	0	0	0	0	1	0.5	0.5	5	0	1.5	0.5	0.5	1	14	0	0	1	0	0	0	0	0	0	0	0	0	0	1	0	1	0	1	0.5	0	0	1.5	3.5
K00582	mtrF; tetrahydromethanopterin S-methyltransferase subunit F [EC:2.1.1.86]	0.5	0	0	0	0	0	0	0	0	1	0.5	0.5	5	0	1.5	0.5	0.5	1	14	0	0	1	0	0	0	0	0	0	0	0	0	0	1	0	1	0	1	0.5	0	0	1.5	3.5
K00583	mtrG; tetrahydromethanopterin S-methyltransferase subunit G [EC:2.1.1.86]	0.5	0	0	0	0	0	0	0	0	1	0.5	0.5	5	0	1.5	0.5	0.5	1	14	0	0	1	0	0	0	0	0	0	0	0	0	0	1	0	1	0	1	0.5	0	0	1.5	3.5
K00584	mtrH; tetrahydromethanopterin S-methyltransferase subunit H [EC:2.1.1.86]	98	144	106	144	368	1476	1606	1400	1242	379	325	414	632	493	847	341	365	571	677	301	1446	246	124	109	224	196	62	118	199	429	277	307	131	247	123	27	237	257	122	1408	118	1670
K00586	DPH5; diphthine methyl ester synthase [EC:2.1.1.314]	3986.16	3480.74	4052.64	3293.5	2424.43	6183	6307.67	5494.91	4608.59	5248.83	4208.16	4973.25	4395.75	4623.49	5316.41	4929.57	4986.88	6235.75	6000.66	4664.75	6402.68	3660.83	4376.32	3743.08	5468.26	5313.41	380.32	2523.16	2588.83	3357.5	3800.33	2627.83	3899.08	6208.9	5514.41	4162.99	6376.4	5691.64	3722.09	7187.82	3008.83	5189.59
K00587	ICMT, STE14; protein-S-isoprenylcysteine O-methyltransferase [EC:2.1.1.100]	5	2	8	0	0	0	0	0	0	0	1	0	0	0	0	0	2	0	0	0	0	0	2	0	0	0	0	0	0	0	0	0	0	0	0	0	0	0	2	0	0	0
K00588	E2.1.1.104; caffeoyl-CoA O-methyltransferase [EC:2.1.1.104]	495.67	922.83	442.58	961.33	707.83	1680	1177.17	948.5	888	861.84	847.5	722.17	483.66	485.67	721.67	809.17	925.66	868	656.33	698.83	1084.34	338.33	414.58	1078.33	406.33	430.17	39	510.67	346.33	469.33	724.5	564	646.16	973.66	440.49	392.17	794.82	934.41	637.66	639	219	772.33
K00589	MET1; uroporphyrin-III C-methyltransferase [EC:2.1.1.107]	0	0	0	0	0	0	0	0	0	0	0	0	2.5	0	0	0	0	0	1.5	0	0	0	0	0	0	0	0	0	0	0	0	0	0	0	0	0	0	0	0	0	0	0
K00590	E2.1.1.113; site-specific DNA-methyltransferase (cytosine-N4-specific) [EC:2.1.1.113]	916.33	1060.49	852.14	737.5	785.51	1846.5	1602	1395.49	1193.17	2149	1594.49	2088.67	1595.83	2137.82	2123.5	2034.49	1898.47	2657.17	1864.83	1410.5	1834.01	1528.5	1317.82	1802.5	3501.68	3820.66	196.99	1100.99	1329	1664	1062.66	739.83	1512.33	2191.98	1082.16	1409.99	2033.15	1937.64	983.17	1463.32	1117.83	1009.17
K00594	xyoA, aldO; alditol oxidase [EC:1.1.3.41]	16	20	21	4	4	3.33	4	2	1	66	70	54	21.67	4	37	50	118	74	40	28.67	27	5	32	3	15	14.33	1	124	32	115.33	32	21	42.67	2	27	15	40	74	37	58	18	3
K00595	cobL; precorrin-6Y C5,15-methyltransferase (decarboxylating) [EC:2.1.1.132]	2403.82	2341.38	2277.04	2641.75	2253.66	3309.58	3056.41	2734.71	2188.67	2221.93	1864.07	2864.85	2197.04	2411.34	3227.41	1655.16	2050.82	3099.16	3266.58	1788.09	3801.93	1920.78	1630.21	2589.17	2558.08	3793.75	105.03	1722.33	1786.5	1036.8	1983.92	1750.08	1627.41	2599.91	1706.25	2013.5	3780.56	2797.62	1630.89	2211.91	1142.83	2067.82
K00596	E4.1.1.64; 2,2-dialkylglycine decarboxylase (pyruvate) [EC:4.1.1.64]	58.33	48.67	35.67	8	13	9	13	13	7.33	10	12	7.83	118.5	34	74.33	11	8.66	13	8.17	24	10.5	13.67	21.16	4.67	23.33	47.33	2	16	25	8	30	36	58.33	12	223.5	14	48.67	29	14.83	5	17	28
K00598	tam; trans-aconitate 2-methyltransferase [EC:2.1.1.144]	332.09	413.73	326.8	188.66	171.45	533	275.34	249.66	219.83	333.67	336.61	405.17	566.99	385.07	564.14	335.27	370.92	499.1	926.67	740.17	970.27	252.33	227.26	354.67	863.29	952.38	18	276.5	191	432.91	187.5	251.17	535.5	169.49	326.79	135.67	433.31	315.76	233.11	1023.4	371	566.67
K00600	glyA, SHMT; glycine hydroxymethyltransferase [EC:2.1.2.1]	19164.7	20302.5	20002.5	23455.5	18469.7	29871.6	28054.9	24098.9	20257.6	22221.6	18055.3	21502.9	16276.9	19485	22120.2	18238.1	20945.6	22642.9	23712.5	15244.9	23505.8	17587.7	16400.7	23774.1	21066.7	20460.8	1171.03	11057.6	13392.6	10370.3	17969.4	14194	17943.1	18299.2	21901.9	10913.6	24966.7	23198.7	14498.4	21641.3	11547.9	22102
K00601	E2.1.2.2; phosphoribosylglycinamide formyltransferase [EC:2.1.2.2]	0	0	0	0	0	0	0	0	0	0	0	0	0	3	2	0	0	0	0	0	0	0	2	0	1	4	0	0	10	0	0	0	3	0	3	0	6	1	3	0	11	4
K00602	purH; phosphoribosylaminoimidazolecarboxamide formyltransferase / IMP cyclohydrolase [EC:2.1.2.3 3.5.4.10]	19520.7	20386.4	20423.8	23932.4	19130.9	30035.5	27684	23757.7	19927.4	22452	18029.6	21892.3	16310	20634	23471.8	18209.1	20799.1	22745.4	23817.5	15000.2	24066.3	17815.4	16425.1	23939.4	21496.9	20603	1135.8	10907.3	13308.1	9930.76	18330.4	14321.7	17904.8	18892	21357.6	11072.6	26050.3	23342.1	14662.6	21321.9	11099.7	21681.1
K00603	fctD; glutamate formiminotransferase [EC:2.1.2.5]	513.98	523.88	676.01	473.26	389	1013.24	485	408.64	359.76	450.42	305.25	421.5	319.74	216.26	295.76	406.25	300.66	429.83	512.49	348	284.17	535.76	364.25	289.76	303	288.76	29.24	260.5	445.24	250.5	285	386.5	375.33	269.76	253.5	194.5	394.25	351.48	329.33	318.26	237.26	283.74
K00604	MTFMT, fmt; methionyl-tRNA formyltransferase [EC:2.1.2.9]	15262.6	16875.3	16090.6	20209	16072.8	24858.4	22802.8	19439.2	16447.2	17105.9	14073.8	16744	11779	15105.8	16936.1	13418.8	16229.8	16622.7	17012.5	10431.5	16983.8	14257.4	12087.1	20153.3	16808.1	16856.4	797.98	8441.83	10823.8	6942.39	14167.6	11467.7	14208.9	12185.9	16008.9	6771.76	19129	17925.4	10751.7	14471.9	8226.41	17064
K00605	gcvT, AMT; aminomethyltransferase [EC:2.1.2.10]	23465	24272.9	23758.5	25838	21449.2	35535.5	32611	28091.5	23505.9	27719.4	22831.8	26973.2	20345.3	24611.6	28085.5	23656	26840.7	30021.5	28145.6	19008	29881.1	19848.9	20186.7	27370.2	25084.6	24091.5	1486.3	14409.3	15963.6	12727.7	18521.6	16365.8	20630.3	24335.6	27572.2	15967.9	31486.2	29169.9	18107.5	27501	13694.2	26195.4
K00606	panB; 3-methyl-2-oxobutanoate hydroxymethyltransferase [EC:2.1.2.11]	17530	18681.6	17892.7	20825	16613.5	28617.6	25498.5	21803.2	18320.6	19698.5	16320.4	19136.9	14122.4	17259.1	19557.4	16001.6	19095.3	20166	20238.8	13554.1	20679	15226	14377.5	22151.1	19297.1	18723.3	1055.5	10236.8	12572.6	9194.66	16268.7	13557	16677.2	17002.5	20706.6	10220.6	20966.4	20575.9	13074.9	19441.9	10596.4	20781.9
K00608	pyrBI; aspartate carbamoyltransferase [EC:2.1.3.2]	15.5	16	31	50	11.5	161	89.5	83.5	76	68	54	94.5	39	12.5	17	66	66.5	142.5	62.5	9	53	71	24	26.5	9.5	7	3.5	15.5	19	26.5	45.5	46.5	57.33	50.5	90	112.5	52.5	27	31.5	23.5	8.5	29.5
K00609	pyrB, PYR2; aspartate carbamoyltransferase catalytic subunit [EC:2.1.3.2]	19039.2	19963.5	19923.4	23187.9	18368.4	29514	27806.5	23830.2	20033.1	22057.4	17702.4	21306	15668.9	19325.3	21830.2	17902.7	20548.3	22210.4	22535.5	14876.1	22778.6	17778.9	16416.5	23804.8	20872.9	20237.5	1163.3	10808.8	13269.6	10188.3	17712.4	14004.2	17734.8	18264.5	21242.1	10787.6	25732	23154.8	14539	21509.4	11167.9	21803.3
K00610	pyrI; aspartate carbamoyltransferase regulatory subunit	4529.66	4067.41	4694.16	3834.88	2599.05	8156.29	6887.17	5980.79	5080.71	6230.22	4955.57	5863.29	5089.37	5349.77	6213.09	5894.71	6010.93	7371.85	6893.78	5076	7166.03	4087.46	4698.83	4084.22	6088.88	6083.67	397.44	2762.16	2758.45	3603.16	4076.83	2798.83	4255.58	7524.78	6078.71	4651.24	6864.34	6230.06	4203.92	7903.1	3348.71	5510.96
K00611	OTC, argF, argI; ornithine carbamoyltransferase [EC:2.1.3.3]	15863.5	15494.2	16731.1	16532.1	11504.2	20640.7	20668.2	17999.3	14839.9	16267.6	12817.5	16233.7	12820.6	15285.6	17634	13625.7	14670.7	17321.3	18188.4	11743.6	18979.2	12858.9	12914.9	14049.9	16735.9	15933.5	948.5	7873.99	8688.45	8142.76	13740.7	9297.78	12628.9	14983.1	12328.5	9061.08	19075.8	17302.8	10488.9	18249.4	8802.41	18617.5
K00612	E2.1.3.-; carbamoyltransferase [EC:2.1.3.-]	975.83	733.6	1234.87	1651.65	1029.41	1318.49	1010.84	876.9	721.58	1385.84	1170.78	1831.82	793.21	1823.34	1939.09	1163.09	1281.23	2223.91	1231.25	770	1336.68	1098.53	898.93	899.42	3305.92	4044.92	49.9	596.67	474.83	599.3	761	622.34	803.09	914.58	822.57	552.34	1381.61	1253.72	901.13	1778.33	622.33	981.58
K00613	GATM; glycine amidinotransferase [EC:2.1.4.1]	14	56	7.67	7	4	9	5	6	4	50	69	29	30	31	11	35	103	42	70	51	80	7	1	7	12	29	0	7	9	17.8	10	0	2	3	0	0	29.83	38	38	6	0	3
K00615	E2.2.1.1, tktA, tktB; transketolase [EC:2.2.1.1]	21902.2	22884.3	23563.3	26458	20659.5	30453.4	29887.2	25646.5	21299.6	23806.9	18528.9	23015.2	16009.7	20123.5	22932.8	17829.4	21333.8	22115.3	22992.6	14196.8	22531.7	20281.8	17208.6	28173.2	23018.5	23139.9	1105.93	13031.5	15286.6	10386.7	19610.9	15730.5	19481.4	17930.7	27259.8	9848.51	24576.3	23332.6	14293	20771.2	11306.6	23279.7
K00616	E2.2.1.2, talA, talB; transaldolase [EC:2.2.1.2]	13887.7	14714.3	14866.7	17746	11981.1	21272	20007.8	17075.7	14196.4	14995.1	11927.7	15062	10637.7	13525.7	15457.9	11649.7	13583.7	15199.5	15688.2	9969.65	15828.1	12828.5	10686.8	14976.2	14160.6	13462.1	732.31	7958.83	10335	6548.03	12942.3	10356.8	12960.7	12100.7	15826.9	6467.43	16545.2	15384.9	8681.9	13965.3	7761.58	16288.4
K00619	argA; amino-acid N-acetyltransferase [EC:2.3.1.1]	2187.19	2545.6	2213.6	1575.74	1633.33	1799.49	2133.92	1862.12	1469.25	2796.17	1960.07	2515.83	2004.13	3018.24	3617.67	2033.16	2204.32	1988.66	3914.5	2725.64	4599.48	2573.25	2051.66	3020	2330.25	2052	86	1075.17	1211.83	904.03	3935.5	1698.67	1859.01	1384.83	1529.16	650.67	4847.93	3472.44	2125.3	4290.16	1891.33	3435.67
K00620	argJ; glutamate N-acetyltransferase / amino-acid N-acetyltransferase [EC:2.3.1.35 2.3.1.1]	12973.4	13931.9	13489.7	13044.5	12297.4	17240.1	14745.2	12707.8	10441.3	11656.1	8990.68	12046.8	7841.7	10944.2	12099.1	8478.73	9981.38	11124.3	11547.4	6950.31	12000.6	11282.3	10093.5	14733.6	12627.2	11633.7	623.48	6594.16	8866.29	5110.35	10361.8	8825.69	11106.9	8870.79	13752.1	5172.42	14182.2	13408.9	8328.75	11194.4	5862.25	13289.2
K00621	GNPNAT1, GNA1; glucosamine-phosphate N-acetyltransferase [EC:2.3.1.4]	9	5.6	6.2	0	3	19	12	11	8	39	27.4	12.2	12.2	13	9	17	37	26	40	55	47	40.6	2.8	4	5	8	0.2	2	0	0	0	2	8	0	0	0	165.4	24.2	28.2	274	0	160
K00622	nat; arylamine N-acetyltransferase [EC:2.3.1.5]	1	1	1	0	0	0	1	0	0	0	0	0	0	0	0	1	0	0	2	0	0	0	0	0	0	0	0	0	0	0	0	0	0	0	4	0	0	0	0	0	0	0
K00624	E2.3.1.7; carnitine O-acetyltransferase [EC:2.3.1.7]	1	3.33	0	1	0	2	0	0	0	2	5	0.5	0	0	0	1	2	0	1	0.33	2.5	0	0.5	0	5	10	2	4	0	0	4	0	0	0	6.5	0	0.5	0	1.5	0	0	9
K00625	E2.3.1.8, pta; phosphate acetyltransferase [EC:2.3.1.8]	2751.39	3069.82	2959.71	5442.5	5376.99	6064.25	4687.21	4087.4	3428.37	3300.7	2711.45	3344.94	2075.34	3024.64	3250.66	2651.59	3062.42	3226.66	2829.5	1433.84	2584.71	2771.25	2455.84	5176.08	1928.44	2151.28	105.83	1373.83	1524.5	965.9	1972.62	1688.03	1662.75	2258.11	1124.25	1033	3973.43	3247.16	2184.17	1802	1329.88	1487.23
K00626	E2.3.1.9, atoB; acetyl-CoA C-acetyltransferase [EC:2.3.1.9]	47204.4	47657.2	47459	63392.4	47587.6	75669.1	66320	57554.7	48240	50764.6	41682.8	49856.5	38996.3	55681.2	59178.9	42600	47502.4	52018.1	54024.1	36302.2	51649.5	39800.8	38376.6	56057.3	58311	61510.7	3095.94	28525.1	31911.8	25907.4	44847.6	38991.9	46370.7	48206.4	47688.3	32220.4	55846.7	50167.7	34631.1	50873.9	26770.4	50747.1
K00627	DLAT, aceF, pdhC; pyruvate dehydrogenase E2 component (dihydrolipoamide acetyltransferase) [EC:2.3.1.12]	16035.3	18886.9	16192.6	25096.3	17683.4	28385.7	25795.3	22009.9	18702.9	20731.7	17752.9	19786.6	14172	17526.9	19212	17854.3	20680.1	21988.5	20598.1	14325.3	19483	15572.3	13810.7	24352.6	18422	21526.7	1132.18	10119	12249	9662.66	16666.8	14091.1	16868.8	17564.1	20984	11627.2	22663	20960.2	13368.5	17693.6	10172	18041.5
K00630	ATS1; glycerol-3-phosphate O-acyltransferase [EC:2.3.1.15]	0	1	1	0	0	0	1	1	0	2	1	1	4	0	11	2	1	1	1	0	10	0	0	1	0	0	0	0	0	0	0	0	9	0	6	2	1	0	2	0	11	0
K00631	plsB; glycerol-3-phosphate O-acyltransferase [EC:2.3.1.15]	2080.26	1812.51	2181.98	3194.74	2600.95	4188.5	3030.84	2714.24	2151.61	1638.49	1676.39	1780.89	1525.71	2531.24	2509.39	1397.6	1864.62	1656.8	2363.2	1158.17	1475.32	1239.76	1175.14	1617.55	1305.79	1850.29	79.2	1518.67	1232.33	698.24	1146.08	1146.93	1017.26	1019.42	894.62	651.34	2060.11	1688.54	1489.68	1288.98	1548.32	927.12
K00632	fadA, fadI; acetyl-CoA acyltransferase [EC:2.3.1.16]	17210	18244.7	17376.8	22276.4	15559.9	28691.3	22923.8	19804.6	16743.7	20393.1	17630.1	19388.8	16214.2	19334.4	21414.6	17507	20567.1	21546.1	21402.5	14850.8	21833	15625.1	15802.8	20109.5	21652.3	19457.2	1140.35	8955.81	10256.7	10282.8	18951.1	14220.2	18875	21233.7	16406.2	13928.6	22516.3	22488.3	14161.3	20867.3	10227.2	24870.2
K00633	lacA; galactoside O-acetyltransferase [EC:2.3.1.18]	8.12	4.24	17.08	0	0	2.67	0.5	0	1.12	2	1.45	0	0	2.07	6.8	1.43	1.1	0.1	1	1	7.1	2	4	6.38	0	29	1	0	0	3.53	5	0	0	0.83	22.3	6	5.31	1.18	2.12	25.4	2	0
K00634	ptb; phosphate butyryltransferase [EC:2.3.1.19]	1229.15	1329.62	1080.92	697.43	320.12	1530.41	1134.43	968.82	811.05	1482.58	1281.92	1293.12	1063.13	1052.7	1327.25	1402.92	1625.84	1610.75	1579.85	1109.84	1637.67	862.76	866.84	767.76	1339.17	2055.09	64.57	533.33	1877.74	456.8	1250.17	630.61	826.66	974.06	932.11	553	1253.68	1399.01	950.37	1424.09	1179.64	806.63
K00635	E2.3.1.20; diacylglycerol O-acyltransferase [EC:2.3.1.20]	6	11.75	13	88.75	28	80	148	112	103.25	17	24.25	26	39	42.5	36	19.75	31.5	28.5	42	63	55	38.25	16	48.5	47.25	22.5	0	40.5	12	13	14.5	11	57	36	32	2	39.5	43.25	21.5	105	97	35
K00638	catB; chloramphenicol O-acetyltransferase type B [EC:2.3.1.28]	13	6.77	14.2	0	3	6	1	1	0	7	14.57	13.2	6.2	2	1	5	13	8	9	1	13	17.6	13.8	35	27	32.5	1.2	6	0	3	95.5	246	44	0.5	14	0	11.4	4.7	8.53	1.83	2	0
K00639	kbl, GCAT; glycine C-acetyltransferase [EC:2.3.1.29]	4607.16	5488.64	4698.93	8913.88	6345.7	10625.1	9953.17	8386.61	7223.98	8706.41	8499.9	7669.94	5523.19	6266.07	7489.76	7886.75	10585.5	8903.55	8945.26	5385.34	7779.16	5056.78	3632.33	8013.51	4984.03	5184.18	272.28	3905.5	3620.12	3010.96	4976.83	3833.62	4760.92	5333.58	3744.56	2607.92	7401.21	7395.58	4594.49	7207.45	4526.42	7028.89
K00640	cysE; serine O-acetyltransferase [EC:2.3.1.30]	16678.4	17985	17646.9	18629	15227.3	25273	22206.4	19072.3	15907.7	19078.3	15241.9	18971.2	13978.7	16636.5	19532.3	15621.5	17629.3	20165.8	20477.6	12478.7	21031.4	15587.7	13837.3	18876.1	19510.4	19381.4	1010.49	9818.32	12097.6	8859.39	14890.1	11312.2	15255.3	16108.7	20745.2	9126.08	22481	19980.4	12453	18275	9802.41	19530.3
K00641	metX; homoserine O-acetyltransferase/O-succinyltransferase [EC:2.3.1.31 2.3.1.46]	7439.23	8705.08	7794.09	7340.59	6534.92	14450.6	10785.9	9201.68	7725.92	11002.2	9258.89	10069.3	7385.92	8079.33	9349.72	9289.79	10909.3	11073	11115.5	7834.69	11158	9281.19	7737.04	9073.75	11905.4	12994.1	615.68	5218.65	6450	5389.9	7191.58	6722.24	9862.83	9094.59	6803.76	5592.16	11743	10857.1	6789.54	10630	5773.15	8055.81
K00643	E2.3.1.37, ALAS; 5-aminolevulinate synthase [EC:2.3.1.37]	2316.83	2174.92	2229.17	3431	2326	4589	4278	3720.5	2969.58	1692	2197.83	1893.33	1698.5	1908.5	2295.33	1669.5	2477.66	1967.75	2191.17	1104.5	2323.5	1131.17	1040.16	1900.67	1862.33	2713.33	99.5	1650.5	1501	838.6	894	1077	1362.33	1155.5	1699	806	2321.25	1990.75	1621.58	1817	896.5	947.5
K00645	fabD; [acyl-carrier-protein] S-malonyltransferase [EC:2.3.1.39]	14912.1	16503.3	15714.7	19931.7	16018.2	23477.2	21566.2	18416.6	15487.8	16680	13499.4	16237.9	11229.3	14621.6	16479	13001.6	15545.4	16071.6	16447.5	10170.8	16373.9	13710.2	11708.6	19885	15360.7	14895.5	775.48	8206.49	10621	6797.52	13953.6	11324.9	13814.2	12106.6	15712.7	6656.09	18187.2	16890.8	10431.4	13903.3	8095.13	16406.9
K00646	pksF; malonyl-ACP decarboxylase	0	0	0	0	0	0	0	0	0	0	0	0	0	0	0	0	0	0	0	0	1.2	0	0	0	4	0	0	0	0	0	0	0.11	0	0	0	0	1	0	0	0	1.38	0
K00647	fabB; 3-oxoacyl-[acyl-carrier-protein] synthase I [EC:2.3.1.41]	3857.33	5145.88	3635.82	8014.9	8309.89	10533.9	5946.6	5158.13	4339.37	6275.81	6008.89	5504.76	3503.7	5099.43	5601.55	4810.85	7194.39	5217.16	5658.45	2960.6	4912.9	4837.18	3056.76	12393.9	5158.59	5824.48	258.73	3316.84	5380.16	1972.75	4585.41	5913.94	5614.26	3115.76	10057.8	1972.02	4667.96	4221.8	3317.89	3160.89	2250.82	2474.95
K00648	fabH; 3-oxoacyl-[acyl-carrier-protein] synthase III [EC:2.3.1.180]	17753.1	20307.8	18748.7	22827.1	18447.9	28770.9	25583.2	21843.3	18321.5	22549.7	19658.6	21384.5	13334.8	18153.9	20514.7	18323.8	23404.3	21909.2	20008.1	13529.2	20612.6	16419.9	14008.4	23752.8	17783.5	17250.9	964.21	11228.7	12679.3	8730.86	16285.9	13671.9	16037.7	15636.5	18322.8	8533.61	22828.1	21608.2	14138	17590.3	10648	19374.2
K00651	metA; homoserine O-succinyltransferase/O-acetyltransferase [EC:2.3.1.46 2.3.1.31]	2868.64	3055.15	2885.89	2704.96	4066.28	4461.95	3652.04	3162.41	2702.87	2814.18	2538.53	2851.47	1806.91	2638.55	2781.73	2439.36	3088.89	3069.23	2186.24	1255.75	1929.53	1995.05	2110.84	4635.26	2596.89	3665.46	152.62	2115	2149.79	1159.76	1179.2	1614.45	1683.5	2425.24	9227.1	1345.25	3806.33	3125.94	2785.11	2174.18	1242.76	1293.65
K00652	bioF; 8-amino-7-oxononanoate synthase [EC:2.3.1.47]	7012.06	9144.91	7208.1	10665.4	9889.5	13602	11920.8	10023.7	8682.4	10777.5	9413.3	10673.4	6699.55	8995.3	10628.3	8365.84	10940.6	10939.3	10743.2	6647.34	10850	8402.67	6469.38	13229.7	8717.3	9571.45	493.68	4809.82	6781.5	4477.41	8636.24	8755.53	9457.66	7622.68	14395.5	4873.83	11501.2	10387.5	6834.77	8809.28	4866.7	7671.04
K00655	plsC; 1-acyl-sn-glycerol-3-phosphate acyltransferase [EC:2.3.1.51]	21673.3	24804.3	22874.3	27017.3	23430.4	35392.8	28377.4	24236.9	20429.1	24679.4	20424.9	24030.2	16583.1	21431.6	24343.7	19377.6	23626.2	23797.6	24919	15161.9	24684.9	20063.1	17227.8	29324.9	21698.9	22978.2	1193.18	13253.5	16580.6	10367.6	19184.6	16383	20304.8	16716.2	26868	9874.6	28772.3	25275.3	16550.5	20537	11260.6	22881.9
K00656	E2.3.1.54, pflD; formate C-acetyltransferase [EC:2.3.1.54]	4432.91	2831.87	5410.98	5096.51	3624.72	5190.17	6097.57	5200.48	4254.74	3731.03	2324.37	4586.59	2210.71	4590.9	4713.3	2615.8	2503.56	4207.9	2995.74	1816.47	3051.62	3061.51	3217.54	3246.97	2552.75	2258.65	147.24	1848.83	1488.74	1501.44	1737.03	1427.67	1747.84	3556.51	1553.87	1566.5	2583.4	2353.97	2068.69	3889.03	2221.25	2466.96
K00657	speG, SAT; diamine N-acetyltransferase [EC:2.3.1.57]	669	836.42	685.42	584.01	402.62	2172.01	1158.75	891.86	866.77	1938.89	2125.99	1670.3	1012.16	1013.28	1213.62	1833.89	2923.29	2098.52	1276.94	577.84	1250.53	622.53	531.3	695.71	894.46	1085.96	31.53	565.66	339.5	436.88	552	248.78	710.67	1080.28	688.91	470	1325.29	1603.55	933.81	610.4	375.71	698.97
K00658	DLST, sucB; 2-oxoglutarate dehydrogenase E2 component (dihydrolipoamide succinyltransferase) [EC:2.3.1.61]	10126.8	12937.2	10030.4	14287.1	11957.5	18458.8	13910.9	11807.4	10081	13725.4	12655.6	12560	8635.6	10703.7	11878	11559.5	15409	13368.2	12456.8	7807.26	11828.3	9565.26	7976.64	15577	10161.3	11354	607.36	6935.66	8522.67	5335.21	9263.91	9158.87	10891.6	9468.7	12920.9	5366.84	13213	13151.9	8696.63	10391.2	6234.87	13784
K00661	maa; maltose O-acetyltransferase [EC:2.3.1.79]	5886.43	4783.64	6148.02	3594.33	2804.83	7308.42	6466.7	5509.42	4619.19	6298.6	4988.02	6132.23	5047.17	5446.03	6326.04	6006.3	5907.34	7756.34	6536.81	5021.17	7100.1	4751.33	5611.58	4406.21	5657.74	5279.74	387.15	2638.82	2356.83	3118.81	3533.36	3182.12	3872.17	8162.09	6435.06	5032.66	8173.52	6827.31	5100.1	6512.89	3325.42	4301.93
K00662	aacC; aminoglycoside 3-N-acetyltransferase [EC:2.3.1.81]	137.15	280.32	172.39	379.67	83.34	675.84	1018	828.44	770	445.17	445.33	442.65	366.72	454.27	528.25	483.65	583.14	654.17	651.44	669.5	784.84	230	140.82	98	126.84	70.67	5.49	125.33	138.83	46	177	172.33	122.66	97.77	60.77	60.66	1066.46	719.23	424.05	821.99	256	206.9
K00663	aacA; aminoglycoside 6'-N-acetyltransferase [EC:2.3.1.82]	718.66	695.1	725.95	545.5	259	544	786.5	676	590.66	799.33	955.57	864.19	356.53	572	527.66	676.33	1124.99	929.5	447	502	415.17	663.27	400.29	972.67	1168.33	1588.33	45.2	382	492	308	606	658	643.33	384.5	679.5	1069	583.4	775.28	679.03	377.67	338	812.67
K00666	K00666; fatty-acyl-CoA synthase [EC:6.2.1.-]	22177.4	21554.9	21602	25264.8	17092.6	34778.4	25275.4	22456.3	18569.3	22167.9	19517.5	22070.5	18637.4	25038.8	27630.6	18667	22625.8	23388.7	25791.1	16947.4	25692.9	17135.2	17172.1	19014.5	29206.8	33061.7	1382.72	12281	14633.3	11093	16762.7	17295.4	17991.3	23052.1	19415.4	17368.7	26866.5	21711.4	15775.5	26416.1	11841.7	23708.9
K00667	FAS2; fatty acid synthase subunit alpha, fungi type [EC:2.3.1.86]	0	0	0	0	0	0	0	0	0	0	0	0	0	0	0	0	0	0	0	0	0	0	0	0	0	0	0	0	0	0	0	0	0	0.33	0	0	0	0	0	0	0	0
K00672	ftr; formylmethanofuran--tetrahydromethanopterin N-formyltransferase [EC:2.3.1.101]	867.83	862.33	840	282.66	1872.5	680.83	888.83	749.33	704	702.84	672.99	908.17	430.17	484.83	519.5	652.33	874.83	1078.83	798	486.83	689.34	859.16	880.17	402.17	729.66	924.84	72.83	268.5	320	576.3	665.5	627.17	577	192.5	226.83	190.5	733.99	1012.83	1003.33	742.5	396	675.67
K00673	astA; arginine N-succinyltransferase [EC:2.3.1.109]	720.23	1076.75	564.83	3043	2289.23	4633.34	1635.33	1418.16	1213.54	1019.31	1152.13	990.15	1190.45	1179.57	1383.95	925.8	1262.39	1035.41	2087.14	1029.19	1428.6	647.03	762.3	3150.55	703.08	783.41	45.56	429.33	449.5	488.79	1663.84	1447.84	1242.5	609	299.29	161.17	993.56	1003.41	768.64	631.54	597.15	776.33
K00674	dapD; 2,3,4,5-tetrahydropyridine-2,6-dicarboxylate N-succinyltransferase [EC:2.3.1.117]	9311.42	10532.1	9186.73	13027.6	9905.75	19953.1	17040.4	14446.6	12423.8	12946	11388.1	11954.5	9282.84	11290.2	12530.3	11088.1	13479.2	13297.7	12753.1	8903.01	12636.8	9398.68	8141.3	15270	11667.4	13093.1	693.35	7266.82	8802.17	6354.31	9213.44	8692.76	10971.8	11479.5	16414.7	7590.83	13725.9	12465.2	8124.2	11026.7	6488.32	9282.49
K00675	nhoA; N-hydroxyarylamine O-acetyltransferase [EC:2.3.1.118]	232.59	285.23	257.84	237.66	99.62	329.5	220.33	177.33	158.58	433.31	384.56	369.32	210.7	252.73	415.13	481.39	542.54	556.68	360.25	258.33	534.53	182.6	289.73	168.17	161.78	152.22	8.53	173	156	65.91	152.5	204.28	166	384	279.46	86	426.76	877.55	412.94	323.9	80.88	59.42
K00677	lpxA; UDP-N-acetylglucosamine acyltransferase [EC:2.3.1.129]	11978.1	13039.5	12450.1	14298.1	15375.2	17478.4	17343.1	14837.5	12374.6	12387.7	10319.3	12728.4	7657.15	10456.4	11806.5	9397.99	12038.1	12360.9	12513.2	7561.76	11622.6	10370.5	9389.74	15978.5	10694.2	11299.9	597.36	6596.99	8691.34	4962.71	8755.91	8639.92	10018.1	7537.78	12618.1	3864.17	13314.1	12732.1	8849.03	10415.1	6568.32	9453.95
K00680	ytmI; uncharacterized N-acetyltransferase [EC:2.3.1.-]	2363.99	2137.27	2382.64	2255.19	2401.67	2958.49	2793.99	2417.03	1876.79	5067.9	6407.34	4163.11	2194.83	2580.29	3071.81	5182.88	8730.08	5472.36	3239.36	1336.18	3105.19	1800.66	1359.25	2040.82	3378.33	4826.84	107.83	2167	1565.17	970.85	1175.5	1448.01	1467	2079.73	1605.2	1083.5	3432.54	3257.33	2675.5	1605.33	659	1355.05
K00681	ggt; gamma-glutamyltranspeptidase / glutathione hydrolase [EC:2.3.2.2 3.4.19.13]	15281.8	17795.1	15085.3	21161.5	17691.2	27206.7	21286.3	18311.5	15323.3	17635.4	16343	17566.8	13943.4	16153.1	18668.5	15701.8	19023.5	19555.4	19744	13080.1	19423.5	13282.7	12865.9	20438	16580.3	19701.7	821.08	9588.97	10991.7	7709.19	13454.3	13410.2	16323.5	15556.1	18284.9	8752.85	21245.5	20591.2	13496.3	17109.5	8593.75	18250.2
K00682	GGCT; gamma-glutamylcyclotransferase [EC:4.3.2.9]	0	0	0.5	0	0	0	0	0	0	0	0	0	0	0	0	0	0	0	0	0	0	0.5	0	0	2	0	0	0	0	0	0	0	0	11	0	0	0	0	0.5	0	0	0
K00683	QPCT; glutaminyl-peptide cyclotransferase [EC:2.3.2.5]	31.08	44.16	37.25	137.34	113	295.5	168.25	120.58	85.66	714.5	930.5	524.33	187.08	108.67	121.08	721.08	1362.08	726	392.91	82.67	228.33	16.08	28.66	160.33	25.5	23.75	6	143	34	82.17	58	43	64	248.67	224.83	26	219.66	217.75	210.5	82	49	213.67
K00684	aat; leucyl/phenylalanyl-tRNA---protein transferase [EC:2.3.2.6]	6896.59	8948.84	7032.42	9277.41	10876.8	13601.4	8664.66	7340.24	6244.52	8701.83	7713.97	9066.47	5457.3	7796.91	8861.12	6474.67	8774.94	8816.46	8637.86	5209.76	8743.41	7184.34	5688.64	12965.6	7494.54	8625.21	451.86	4791.16	6425.17	3681.38	6924.41	7818.09	8478.58	5776.92	10934.3	2971.34	10390.3	8955.29	6350.1	6140.23	3853.82	5121.12
K00685	ATE1; arginyl-tRNA---protein transferase [EC:2.3.2.8]	3829.58	4321.22	3805.19	3471.16	5222.16	6408.08	4562.58	3862.66	3260.28	3535.84	3161.39	3674.85	2599.22	3607.01	3880.08	2696.12	3595.15	3410.36	4005.7	2291.26	3427.88	4109.85	3164.88	6117.14	3745.51	4367.9	227.03	2959.33	4896.67	1663.13	2127.58	3762.92	4911.25	2284.75	9413.16	1686.34	5075.75	3961.36	3212.94	2993.66	1999.66	2223.04
K00686	tgl; protein-glutamine gamma-glutamyltransferase [EC:2.3.2.13]	131.5	137.83	114.08	23.5	21	40	13	14	8	82.5	71.5	65	80	17	53.5	71.83	95.83	91	91	106	65	46	87	35.5	47.5	40	6	29	55	6	33.5	11.11	151	204	70	10	152.62	132.08	94.11	30	34.38	28
K00687	pbp2B, penA; penicillin-binding protein 2B	26.17	28	39	5.33	36.87	11.33	74.53	46.33	36.33	15.37	10.29	12.32	6.67	5.2	6.25	11.67	9.83	11.33	3.25	14.5	12.62	7.5	0	4.33	20.27	23.2	9	11	50	24.6	19.2	17.67	47	0	0	0	8	2	3.33	11	54.5	5.4
K00688	PYG, glgP; glycogen phosphorylase [EC:2.4.1.1]	13894.5	15042	15309.7	15157.2	13293.7	17384	15729.1	13496	11335.1	14687.5	10277.2	15093.7	9435.19	14100.7	15340.3	10519.5	11175	14163.4	13616.8	8726.61	14065.1	14260.3	12324.8	18359.3	15603.3	14120.4	794.27	7829.16	10959.2	6456.05	12924.1	10716.1	13207.7	10959.4	29487.2	6397.17	18562.8	15957.3	9527.7	13046.7	6728.45	15536.6
K00689	E2.4.1.5; dextransucrase [EC:2.4.1.5]	5.17	0	0	0	6	1	1	0	0.33	2.33	5.34	3.33	3.33	1	1	0.17	3.83	1	1	0	20.64	0.17	0	0	3	6	0	0	2	13	11	0	0	0	1	0	0.67	1	0.33	5	0.5	4
K00690	E2.4.1.7; sucrose phosphorylase [EC:2.4.1.7]	269.83	239.64	279	1411	246.83	2592.01	2555.83	2185.75	1848.75	341.56	510.46	366.93	753.65	511	616.21	333.12	639.04	474.33	1231.82	474.18	1006.89	334.25	453.09	456.5	366.76	256.57	23.33	211.33	268.5	214.03	451.58	432.08	318.58	281.75	202.22	230.67	499.86	589.93	366.48	568.47	221.16	355.84
K00691	mapA; maltose phosphorylase [EC:2.4.1.8]	375.42	403.49	401.75	638.67	336.5	2091.33	1666.25	1334.08	1252.49	1728.49	1961.42	1479.58	1052.74	1149.11	1245.41	1710.08	2760.91	1950	1188.83	475.67	1125.92	484.75	375.33	625.83	747	877.08	22.5	327	179	292.5	358	205.11	533.17	1037.17	563.33	378.5	1010.8	1220.75	628.61	463.5	304.88	543
K00692	sacB; levansucrase [EC:2.4.1.10]	1303.16	644.91	1218.97	125	220.21	212.67	330.2	267.99	216.92	481.7	467.19	626.9	352	221.52	286.33	414.99	595.64	828.42	489.66	204.5	330.21	335	899.15	175.33	267.11	117.86	8.49	93.66	150.83	125.1	388.36	600.44	393.33	911.15	140.66	579.99	175.82	164.39	323.64	275.32	105.21	121.74
K00693	GYS; glycogen synthase [EC:2.4.1.11]	5	18	10	3.5	17	21	7.5	1.5	2	272	246.33	163	15	4.67	4.67	293.33	342	238	27	21	11	87	8	115	426	498	0	38	7	5	0	3	15	9	2	1	56.33	84	37	5	18	3
K00694	bcsA; cellulose synthase (UDP-forming) [EC:2.4.1.12]	697.69	653.02	755.36	864	214.15	1331.67	565.53	467	380.75	490.01	573.32	1088.64	537.33	352.6	570.3	444.67	567.93	1504.97	678.16	585.5	598.27	551.5	374.36	395	2222.05	3025.25	35.5	396	252	284.41	385.2	615.33	284.66	696.33	289.3	298.5	680.56	719.76	450.03	477.4	461	454.56
K00695	E2.4.1.13; sucrose synthase [EC:2.4.1.13]	99.67	101.5	100.67	189.5	141.33	256	198.5	170	143	132.67	53.67	92.5	157.5	533.5	465	82.83	40.83	78	54	60	35.67	146	176	1004.5	173.83	238.67	56	828	915	340	189.5	485.33	372.16	354.16	7606	250.5	401.83	411.33	118.5	191.5	97	208.33
K00696	E2.4.1.14; sucrose-phosphate synthase [EC:2.4.1.14]	1689	2225	1883	1750.5	3412	2680	2179	1887.61	1643	2436.5	1638	2414.5	1165.72	2040.5	1980.33	1822	1908	2358	1358.11	845	1198.5	3014.5	2357.5	4183.5	2493.5	3155.5	100	1218.5	1557	694.8	867.5	1110.5	1122.66	1147.44	8367.61	912	3409.5	2428.5	1860.5	1390	553	1106.56
K00697	otsA; trehalose 6-phosphate synthase [EC:2.4.1.15 2.4.1.347]	3106.16	3175.71	3209.79	5454.83	1731.55	5892.67	4822.25	4277.83	3766.25	3885.31	3051.58	3753.95	3639.49	4302.56	4859.53	2942.95	3366.65	3772.1	4516.24	2898.08	4454.45	3658.34	2665.24	3652.84	5316.71	4976.45	164.32	1964.99	2029	1461.71	2721.83	2781.83	3106.24	4297.4	3689.46	3248.16	4941.01	4136.24	2421.83	4450.81	2115.5	6614
K00700	GBE1, glgB; 1,4-alpha-glucan branching enzyme [EC:2.4.1.18]	10005.2	11059.2	10827.5	8854.03	9489.27	12207	12204.8	10370.6	8649.94	11538.2	9893	11616.8	6261.98	8745.65	9809.1	9012.06	11342.1	11486.5	10011.3	6365.25	10135	9716.88	8435.9	12245.4	10319	11179.8	527.48	5663.83	7255.62	4544.06	7895.53	7236.45	9539.49	6966.18	12151.2	4275.92	12826.4	12323.7	7769.07	8872.94	5196.58	8124.2
K00701	cgt; cyclomaltodextrin glucanotransferase [EC:2.4.1.19]	5	2	8	1	0	1	1	0	0	0	3	0	0	0	0	2	3	0	1	0	0	0	2	0	0	0	0	0	0	0	0	0	0	0.33	0.25	0	1	0	2	0	0	0
K00702	E2.4.1.20; cellobiose phosphorylase [EC:2.4.1.20]	358.5	407.33	597.5	923	1221	1171	596	569.5	418.5	1125.5	520.5	902.5	149	351.5	335.5	940.66	606.16	941	194	160.5	179	1023.5	1007.5	968	761	720	16	157	212.5	142	200	74.5	191.5	177.5	30	126	1013.5	558	215	210.5	43.5	127.5
K00703	glgA; starch synthase [EC:2.4.1.21]	11780.8	13590.6	12735.4	12506.2	11608.9	16725.5	16133	13678	11403	13725.7	11167.6	13271	8361.17	10273.2	12109.2	10674.5	12760	12941.4	13343.1	8345.06	13427.9	11205.7	9863.72	15633.6	12134.4	12069.9	624.15	6088.5	8330.95	5505.43	10841	8057.79	11273.5	8874.02	13999.4	4324.09	15478.4	14692.8	9110.56	11377.4	6841.91	11101.7
K00705	malQ; 4-alpha-glucanotransferase [EC:2.4.1.25]	9109.37	8259.16	9800.96	6079.03	4841.12	7694.54	8422.96	7193.98	5919.95	8696.12	6399.33	8963.34	5726.23	6312.7	7512.76	6906.48	7356.24	9606.8	9157.64	4964.38	8867.76	7366.14	7338.22	9829.76	7549.23	8706.46	366.64	4291.49	5812.95	3224.46	7236.69	4360.84	5815.99	6599.22	12338.5	4719.08	10818.8	9795.23	5964.5	7735.43	3945.37	7267.15
K00712	tagE; poly(glycerol-phosphate) alpha-glucosyltransferase [EC:2.4.1.52]	1	18	7	11	52.2	11	231.2	154	112.33	22.95	5.37	25.48	7.33	7.2	6.33	11.25	5.33	4.25	4.25	32	13.92	21	0	9	72.6	67.2	27	117	146	68.6	38.2	39.11	142	24	28	20	6	7	4.33	23.67	54	2.4
K00720	UGCG; ceramide glucosyltransferase [EC:2.4.1.80]	133.16	157.49	152.74	44.99	111.33	122.66	98.17	92.49	76.5	201.67	184.32	168.67	66.16	73.67	81.67	202.17	201.66	252.66	144.67	143	116.51	161	94.58	122.5	199	143.17	4	76.67	80.33	213.6	222	56.67	399.67	12	107.99	26.67	242.16	169.58	142.49	40.83	89.5	48
K00721	DPM1; dolichol-phosphate mannosyltransferase [EC:2.4.1.83]	12973.2	13563.8	13739.1	14500.3	9674.25	18156.8	16113.8	13914.4	11829	16840.4	14802.7	15171.9	13001.2	15580.8	17454.6	14780.5	17634	16949.1	19690.2	12455.8	18733.3	14295.5	11526.2	15161	19771.4	18220.2	807.26	7895	7655.11	7289.78	16630.8	9981.62	12760.6	13732	13061.9	8801.58	17197.2	16922.7	9878.67	18462.2	8894.09	20211.4
K00729	ALG5; dolichyl-phosphate beta-glucosyltransferase [EC:2.4.1.117]	15.5	58	14	5	4.5	48.5	4.5	3.5	4	12	11	19	8	8	6	19.5	15	23	12	4	20	50	11.5	8.5	25	8	0	22	11	1	15	5	8	5.5	7	0	45	3	0	9.5	5	25
K00737	MGAT3; beta-1,4-mannosyl-glycoprotein beta-1,4-N-acetylglucosaminyltransferase [EC:2.4.1.144]	0	0	0	0	0	0	0	0	0	0	0	0	0	0	0	0	1	0	0	0	0	0	0	0	5	0	0	0	0	0	5	0	0	0	0	0	1	6	0	0	0	0
K00745	E2.4.1.166; raffinose-raffinose alpha-galactotransferase [EC:2.4.1.166]	0.17	0	0	0	0	0	0	0	0	0.33	0.67	0	0	0	0	0.17	0.5	0	0	0	0.17	0.17	0	0	0	0	0	0	0	0	0	0	0	0	0	0	0.67	0	0	0	0.5	0
K00748	lpxB; lipid-A-disaccharide synthase [EC:2.4.1.182]	11582.9	12631.2	12157.3	14647.2	13751.6	17148.2	17391.8	14915.1	12347.4	12108.8	10094.8	12792.9	7687.98	10334.4	11837	9121.99	11645.5	12658.7	12411.2	7659.76	11808.4	10224.3	8980.74	15875	10897	11530.9	585.86	6658.99	8759.34	4963.71	8859.91	8540.75	9792.08	7902.61	12771.1	3998.67	13363.1	12421.3	8113.03	10291.7	6554.32	9479.28
K00752	hasA; hyaluronan synthase [EC:2.4.1.212]	21.16	21.32	28.99	73.5	54.33	155	118.34	82.99	72.99	70.34	48.66	42	95.32	57.34	33.5	44.84	57.99	52	136.5	76.17	47.5	66.83	8.99	17.33	31.5	32	5	33.67	17.33	39.67	27	36.67	29.5	260.17	32.49	12.67	175.82	21.83	29.49	44.5	50.5	8
K00754	bshA; L-malate glycosyltransferase [EC:2.4.1.-]	1346.63	1455.05	1554.43	2374.85	1359.3	6354.65	3788.42	3098.82	2747.44	5040.5	6523.12	4058.91	2570.71	3207.41	3433.14	4898.41	8867.06	5068.94	2546.92	1287.68	2995.18	1921.33	1923.97	2618.32	1497.01	2138.33	109.99	1339.66	937.5	868.01	1841.16	2123.5	2024.34	3145.63	1829.59	1504.66	3799.75	5213.48	2525.34	1160.48	722.5	1468.56
K00756	pdp; pyrimidine-nucleoside phosphorylase [EC:2.4.2.2]	2529.07	3226.8	3206.44	4612.78	3153.99	6462.28	4803.88	4061.51	3490.41	4470.88	3184.77	3768.44	2973.3	3336.75	3904.13	3883.5	3600.64	3975.24	4340.98	3182.88	4721.52	3742.04	3341.41	4459.38	2888.93	2752.42	169.45	1557.17	1935.95	1612.05	2492.2	1653.62	2820.83	2735.68	1615.93	1432.42	5517.69	4578.93	2346.96	4256.21	2165.26	4191.92
K00757	udp, UPP; uridine phosphorylase [EC:2.4.2.3]	8026.03	7518.65	8119.3	9515.22	7017.15	14657.3	12932.6	11242	9381.67	12103.2	10292.3	11264.6	9549.32	10393.9	12038.1	11464.2	12565	14346.1	12848.9	8919.25	13472.3	7297.04	8484.15	10270.2	10895.8	11030.2	700.26	5383.65	5250.28	6385.16	8061.99	5577.83	7763	13298.4	11729.6	8969.23	12711.8	11915.8	7826.84	12510.6	6526.87	9969.26
K00758	deoA, TYMP; thymidine phosphorylase [EC:2.4.2.4]	2390.95	2956.93	2150.21	5073.84	4878.45	5739.58	4037.49	3423.91	2843.12	2741.22	2666.47	2528.48	2178.75	2757.64	2972.87	2595.71	3014.05	2770.17	3297.07	1846.48	3016.73	1506.85	1873.81	5327.88	2114.54	2827.96	124.03	1805.83	1643.67	1265.08	1918.42	2071.42	1619.92	1524.92	1627.63	925.5	3292.5	3159.83	1981.4	2577.14	1399.33	1546.08
K00759	APRT, apt; adenine phosphoribosyltransferase [EC:2.4.2.7]	19537.1	19305.1	20390.7	20731.5	14112.5	28517.1	27191.8	23531.2	19520	22162.3	18035.1	21385.6	16773.2	18508.8	21422.9	19387	21038.3	24381.1	23175.6	16071.4	24093.9	16124.2	17117.4	18221.2	21587.3	20790.1	1231.95	10459.5	11044.5	11196.1	17599.8	11380.7	16362.9	21238.2	17850	13278.9	24208.1	23166.5	14056.4	24729.6	11626.2	23754.5
K00760	hprT, hpt, HPRT1; hypoxanthine phosphoribosyltransferase [EC:2.4.2.8]	15112.7	16546.6	16161.2	19398.6	15804.4	23479.2	21706	18518.1	15641.6	16017.2	12434.8	15241.4	11093.9	14925.5	16169.2	12290.4	14021.6	14351	16295.7	9923.39	15030.4	14133.6	11883.4	19753.6	14913.1	13360.8	771.6	7901.83	10549.2	6440.84	15465.6	10991.5	13965.4	11747.3	15812.4	6200.84	17846.4	16526.5	10271.5	13566	7945.46	16209.1
K00761	upp, UPRT; uracil phosphoribosyltransferase [EC:2.4.2.9]	12557.3	12107.3	13260.3	15642.1	11457.5	21410.3	18886.1	16197.3	13389.3	14949.4	12537.8	14448.6	11288.3	12225.3	14443.3	13096.2	14807.7	16209.9	16240.2	10199.6	16598.1	10405.1	11063.8	14713.9	12970.6	14023.7	713.3	6821.15	6977.79	6792.76	12757.8	7617.7	9727.99	13397.3	11357.6	8265.74	17089	15806.2	9279.93	14379.3	7284.08	12137.5
K00762	pyrE; orotate phosphoribosyltransferase [EC:2.4.2.10]	22488	23151.1	23269	25459.7	20522.8	35937.1	33570.7	28846.7	24228.7	26466.4	21901.7	25776.1	19461.6	23427.8	26481.1	22279.5	25531.9	28025.2	27266.7	19183.3	28507.7	20330.2	20154.1	27096.8	25585.7	24696.6	1465.61	13103.1	15572.8	12958.3	20744.4	16342.4	21250.1	24243.4	26476.2	14886.7	30066	28230.4	17664.8	27552.7	14082.2	26295.4
K00763	pncB, NAPRT1; nicotinate phosphoribosyltransferase [EC:6.3.4.21]	15871.8	15463.4	16740.8	22145.2	14997.7	26563.3	26274.1	22522.8	18823.3	18887.4	14500.4	17947.6	13563.5	17490.3	19218.5	15441.2	16629.7	18732.2	18821.7	13152.2	19335.7	15227.8	14015.6	20545.7	17069.2	16050.4	979.17	9307.99	11897	8537.93	14927	12294.4	14897.7	16866.3	20309.7	9953.41	20823.7	19130.2	11473.7	18796.3	9278.42	19418.4
K00764	purF, PPAT; amidophosphoribosyltransferase [EC:2.4.2.14]	19014.2	20098.2	19766.4	22963.9	18859.4	29964	27991	24021.5	20201.9	21917.4	18043.9	21380.5	15276	19665	22000.2	17900.4	20980.6	22306.4	21807	14848.1	22603.6	17072.9	16092.6	23493.9	20964.9	20231.5	1168.8	11042.8	13252.6	10161.8	16429.9	13328.7	17242.7	18073.5	21360.1	10852.1	24239.9	22667.1	14508.5	21308.9	11239.9	21405.3
K00765	hisG; ATP phosphoribosyltransferase [EC:2.4.2.17]	18862	19862.8	19702.9	21393.5	18128.4	28483.6	25013.8	21549.3	18002.8	21378.7	17183.3	20795.3	15210.2	18860.3	21354.9	17106.7	19899.6	21395.5	21799.8	13894.1	22009.5	17729.6	16194.7	23967.1	20672.7	19964	1138.3	10445.3	13023.6	9832.76	17297.4	13798.5	17494.8	17879.6	20815.6	10472.1	23303.1	22006.2	13827.5	20309.9	10691.9	21211.8
K00766	trpD; anthranilate phosphoribosyltransferase [EC:2.4.2.18]	21956.9	22369.7	22692.4	23939.2	19717	31685.1	28918.7	24970.4	20791.2	25220.5	20487.4	24450.2	18193.8	22407.6	25110.3	21063.3	23898.3	26339.8	25709.9	17402.5	25924	19969.7	19578.8	26732.5	25822.4	25553.6	1430.62	12466.1	15055	12425.9	20370.4	15798.4	20652.6	23200.4	25472.6	14184.6	28448	26463.2	16708.9	24163.2	13004.3	23935.8
K00767	nadC, QPRT; nicotinate-nucleotide pyrophosphorylase (carboxylating) [EC:2.4.2.19]	15811.8	17671	16618.1	20804	16034.5	25811.6	24334	20883.3	17578.8	19669.1	15782.3	18888.2	13698.7	17060.1	19592.1	15897.3	18374.8	19737.3	19277.3	13284.2	20557.2	15734.6	14285	21582.4	19340.8	18998.5	1078.3	9911.82	12213.6	9615.16	16859.7	13301	16903.3	16475	19733.6	9218.58	21410	20533.8	12552.8	19018.9	9886.41	20487.2
K00768	E2.4.2.21, cobU, cobT; nicotinate-nucleotide--dimethylbenzimidazole phosphoribosyltransferase [EC:2.4.2.21]	6500.22	7247.31	6602.18	7408.3	5240.91	9615.46	6567.92	5743.75	4862.45	6652.16	5040.57	6457.26	5189.54	7615.52	8218.92	5079.13	5671.64	6215.68	6885.94	3886.13	7487.74	5669.74	4866.57	6067.35	6460.71	6468.33	395.65	3961.16	5980.29	2864.99	6471.41	4992.42	5652.42	7199.66	11724.2	4017.42	9691.7	7271.16	4706.76	6662.28	3506.87	8375.61
K00769	gpt; xanthine phosphoribosyltransferase [EC:2.4.2.22]	1686.59	1602.18	1506.65	2017.84	1981.12	2800.51	2481	2173.42	1762.45	1266.23	1348.59	1319.62	1754.26	1460.9	2208.04	1214.89	1520.38	1390.52	2789.42	911.17	2841.27	716.42	908.68	1365.05	1415.79	2134.29	68.33	1016.66	1025.5	676.91	1177.75	1011.42	945.25	1182.42	1218.72	685	3222.78	2140.68	1294.08	1160.65	673.33	634.41
K00772	mtaP, MTAP; 5'-methylthioadenosine phosphorylase [EC:2.4.2.28]	8705.53	8883.03	9215.36	9481.91	8004.66	12609	11289.6	9823.29	8240.41	9880.01	7419.91	9908.33	7864.04	9042.74	10506.7	8174	8495.81	11036.8	11137.1	7245.72	11822.5	8375.75	6922.49	8865.17	10527.2	8685.5	514.5	4689.67	5350.83	4536	9548	7510.5	10965.2	8322.33	6192.32	4512.67	11589.8	9677.19	5976.02	11372.8	4924.83	13504.8
K00773	tgt, QTRT1; queuine tRNA-ribosyltransferase [EC:2.4.2.29]	15213	17098.8	16019.8	22102.4	18067.4	24793.5	22075.4	18843.8	15847.9	17208.2	13801.9	16652.2	11472.3	15005.3	17045.8	13274.2	15802.3	16229.1	16979.8	10227.8	16846.4	14373.6	12105.8	22769.3	15239.1	14423.6	770.98	8190.66	10647.8	6696.26	14374.1	11861.4	13933.1	12338.6	15758.1	5958.09	18464.7	17173.6	10694.4	14173.1	8267.08	16463.7
K00782	lldG; L-lactate dehydrogenase complex protein LldG	6628.27	7191.34	6522.18	5653.91	5805.02	11182.3	8379.83	7252.55	6110.25	8056.23	6614.2	8122.44	5967.04	6454.89	7806.04	7092.69	7757.43	9476.59	8319.49	5916.22	9380.01	5930.17	6672.82	6044.42	7319.5	7914.57	497.65	4355.99	3877.33	4272.53	5980.08	4496.53	6176.42	7822.07	6323.54	5695.49	10202.9	9267.69	6229.74	8681.88	4055.53	7064
K00783	rlmH; 23S rRNA (pseudouridine1915-N3)-methyltransferase [EC:2.1.1.177]	9628	10339	10184	14480.2	12647.1	16778	15901	13647	11342.1	11789.2	9174.76	11028.6	7481.44	9356.83	10988.1	8985.17	10664.4	10552.5	11025.8	6143.81	10946.2	9074.4	7659.8	15120.2	8351.82	9459.28	566.15	5756.16	8351.79	4583.43	7505.61	8083.37	9204.08	8219.77	12410.6	3949.09	12505.4	10131.1	7166.41	8440.11	4970.25	11106.9
K00784	rnz; ribonuclease Z [EC:3.1.26.11]	8278.58	8467.11	8672.12	8622.67	5278.08	14207.4	11439.9	9714.68	8309.58	11409.8	9863.03	11094.5	8641.47	9923.2	11338.2	10068	11795.7	12976.5	12250.1	8300.93	12318.8	8714.58	8335.92	8495.66	12314.1	13469.6	589.81	5193.15	4543.33	5728.01	8185.7	5505.28	7897.91	11132	8126.81	6956.49	12366.5	12251.6	7239.86	12448	5878.87	10819.3
K00785	lst; beta-galactosamide-alpha-2,3-sialyltransferase [EC:2.4.99.-]	0.17	3.42	0.17	193.42	28.67	800.17	72.5	58.67	43.58	7.98	7.3	12.29	20.17	2.83	9	9.37	10.14	15.67	34.5	10.83	16.17	1.25	2.17	2	5.42	25	0	0.83	0	0	0.33	3.17	0.67	3.67	25.17	0	14.38	6.75	1.71	18.17	1.83	20.33
K00786	E2.4.-.-; glycosyltransferase [EC:2.4.-.-]	63.5	85.72	71.2	264.51	144.33	463.67	340.33	263.71	199.33	1434.5	1823.66	1034.78	307.7	154.34	250.24	1436	2621.83	1450	654.24	164.01	466.75	49.6	55.47	210.33	78.17	147.83	6.53	210.33	55	161.67	92.17	56	118.5	292.67	282.33	44	464.06	480.53	449.53	177.83	114.5	317.16
K00788	thiE; thiamine-phosphate pyrophosphorylase [EC:2.5.1.3]	19110.7	20229.8	19522.2	22024.7	19774.7	29297.5	25176.8	21652.2	18093.7	20498.4	17143.5	20411.5	14242.2	18750.1	20971.6	16914	19827.4	21043.4	19562.6	12438.1	20180.7	16174.9	15337	24292.9	20275.5	20571.2	1101.3	11470	13878.8	9603.76	16228.6	14325	17436.5	17045	21172.1	10654.6	23012.6	21586.3	13787.9	17726.4	10467.9	18646.8
K00789	metK; S-adenosylmethionine synthetase [EC:2.5.1.6]	18934.6	19992.3	19803.4	23219.9	18371.7	29732.5	27884.5	23922.2	20108.1	21913.9	17720.6	21228.6	15672.5	19263.8	21768.5	17915.1	20578.3	22328.4	22607.7	14969.1	22822.1	17420.6	16164.8	23614.1	20865.7	20241.9	1161.8	10856.8	13259.6	10190.8	17727.9	13967.7	17754	18457.4	21334.1	10896.6	24580.6	22587.6	14176.5	21376.4	11148.9	21826.3
K00790	murA; UDP-N-acetylglucosamine 1-carboxyvinyltransferase [EC:2.5.1.7]	15273.6	16939.4	16250.9	20496.2	16086.6	24456.9	22039.7	18809.7	15839.2	16918.1	13683	16454.5	11408.9	14643.5	16566.2	13169.2	15799.2	16350.4	16856.2	10708.8	16548.9	14000.7	12035.3	19973.9	15472.1	15038.5	808.39	8456.66	10881.5	7067.76	14111.3	11404.8	14221.1	12471.3	15871	6745.09	18439.9	17221	10711.5	14458	8495.72	16761.7
K00791	miaA, TRIT1; tRNA dimethylallyltransferase [EC:2.5.1.75]	15384	16981.8	16191.8	20083.4	16116.4	24093.5	21823.4	18633.8	15712.9	17785.5	14207.9	17233.7	11794.3	15268.3	17317.8	13731.5	16476.3	16987.1	17346.8	10489.8	17140.9	14603.6	12128.3	20617.3	16000.1	15635.6	783.98	8396.16	10806.8	6942.26	14193.1	11457.4	14029.1	12673.1	16060.2	6924.09	18599.7	17316	10801.9	14631.6	8333.58	16867.7
K00793	ribE, RIB5; riboflavin synthase [EC:2.5.1.9]	18394.2	19531.6	19045.9	22037.5	17982	29040.1	27078	23216.3	19473.6	21087.6	17354.6	20520.4	14862.5	18504.6	20859.9	17276.2	20230.4	21603.4	21231.9	14469.1	21858	16455.6	15620	23042.1	19875.1	19177.8	1077.8	10587.8	12871.6	9549.16	16742.2	13448	17070.7	17886	20972.6	10702.1	23458.5	22084.8	13922.2	20569.9	10941.9	21113.3
K00794	ribH, RIB4; 6,7-dimethyl-8-ribityllumazine synthase [EC:2.5.1.78]	19375	20520.7	19876.6	24022.7	19730.3	30533.8	28320.5	24337.8	20280.3	21857.3	18109.6	21251.7	15917.7	19820.8	22304.6	18014.2	21074	22411.5	22717.2	14836.4	22874.6	16793.6	15923	23809.1	21063.3	21218.7	1119.13	11304.1	13552.6	9920.16	15855.9	13990	17259.2	18590	20539.6	10936.1	24775.1	22828.6	14524.8	21316.8	11109.9	21730.7
K00795	ispA; farnesyl diphosphate synthase [EC:2.5.1.1 2.5.1.10]	4199.51	5151.36	4141.52	7450.42	8010.62	8885.42	7846.91	6602.17	5716.03	5058.48	4264.82	4947.31	3211.41	4812.57	5099.71	3756.59	4807.04	4600.3	4863.79	3080.42	4121.4	4843.27	3381.65	9478.14	5683.38	6867.12	260.03	3437.99	5271.84	2042.71	3795.91	5077.42	5545.42	3138.42	9844.97	1935.67	5747.13	4726.88	3653.95	3693.07	2392.33	2713.79
K00796	folP; dihydropteroate synthase [EC:2.5.1.15]	23332.5	23854	23935.5	27722.2	19751.8	34513.4	31285.7	26941.7	22615	26494.2	21597.7	25657.7	20221.8	24471.3	27340.9	22258	25176.7	28079.5	28224.7	19038.8	28267	20416.2	19457.6	27014.3	26473.7	26233.6	1463.61	13248.6	15955.8	12909.8	21606.9	16931.9	21767.7	25480.5	26861.2	16259.2	29504.1	27688.7	17497.8	26625.4	14235.7	29256.9
K00797	speE, SRM; spermidine synthase [EC:2.5.1.16]	7267.57	9684.8	7675.19	8022.78	6975.57	12723.4	8928.26	7771	6329.16	8526.42	6831.28	8432.85	5138.96	7942.96	8471.77	6536.99	7657	8049.77	9064.67	6449.48	8716.65	8276.65	6562.35	11841.6	9513.95	8563.18	444.17	4753.5	8563.95	3558.36	7775.42	6721.37	8965.9	4556.59	12038.1	2412.25	11705.3	9129.22	6404.91	7390.59	5437.08	6660.39
K00798	MMAB, pduO; cob(I)alamin adenosyltransferase [EC:2.5.1.17]	10698.7	11522.9	10802.2	12910.6	10530.3	19434.1	15504.7	13276.8	11271.9	14631.3	12208.3	13501.9	10630.7	13221	14374	12697.6	14587.7	15368.2	14090.4	9513.75	14464	11629.9	9676.02	14125.5	14348.2	15807.9	740.97	7411.66	9397.95	6641.05	11376.8	8613.78	12315.6	12951.7	17802.5	8522.91	16355.1	14097.7	9253.63	12993.4	6756.75	14583.5
K00799	GST, gst; glutathione S-transferase [EC:2.5.1.18]	19189.9	20798.9	18590.7	26008.9	26609.7	40948.3	29319.8	25342.3	20813.3	17958.8	17357.8	20799.1	15101.4	19254.4	22809.5	15416.1	19402.1	22897.5	21790.6	12024.9	21405.8	14159	12201.4	20867.9	21492.7	29780.1	936.54	14225.3	16554.7	8459.82	11963.4	15415.1	18433	14814	22347	9286.55	23307.8	19072.8	13945.1	16796.6	8845.14	14688.3
K00800	aroA; 3-phosphoshikimate 1-carboxyvinyltransferase [EC:2.5.1.19]	19089.7	20162.3	19929.3	23602.9	18463.6	30059.1	28220.5	24200.9	20354.2	21993.5	17822.1	21311.9	15991.8	19354.3	22297.9	17999.8	20679.2	22404.6	23217.5	14896.8	23820.1	17482.4	16237.1	23666.2	20941.3	20328.8	1162.8	10893.3	13279.6	10190.8	17737.4	13984.2	17774.7	18582.2	21366.1	10830.1	26097.2	23353.1	14462.8	21290.4	11189.9	21810.5
K00801	FDFT1; farnesyl-diphosphate farnesyltransferase [EC:2.5.1.21]	3891.49	3459.07	4277.14	4190	3122.93	5536.5	5411.67	4725.52	3922.42	5046.58	3679.66	5398.66	3563.8	4379.49	4723.74	4650.82	4330.71	6804	4540.02	3823.25	4606.1	3972.5	4589.15	4153.08	4971.26	5073.41	325.82	2374.16	3895.33	2822	2954.33	2183.83	3326.41	5703.17	4977.02	4236.99	6418.07	5373.31	3269.09	4182.82	2901.83	2840.65
K00802	SMS; spermine synthase [EC:2.5.1.22]	0	0	0	0	1	0	0	0	0	0	0	0	0	0	0	0	0	0	0	0	0	1	0	1	0	0	0	0	0	0	0	0	8	0	0	0	0	0	0	0	0	0
K00803	AGPS, agpS; alkyldihydroxyacetonephosphate synthase [EC:2.5.1.26]	672.16	635.92	658.68	563.82	244.16	1692.5	745.68	662.82	598.66	915.34	854.22	925.7	738.67	783.5	781.17	755.84	932.82	1032.66	1172.84	941.01	874	820.76	657.96	888.5	868.5	1131.66	46.7	413.34	595.16	509.5	941.5	709.84	978	531	732.15	992.34	829.72	755.02	482.34	1042.99	573.66	1373.5
K00805	hepST; heptaprenyl diphosphate synthase [EC:2.5.1.30]	5773.58	4340	6889.87	8392.38	4348.79	7663.87	8134.93	7100.43	5893.08	5846.32	3130.5	5586.86	3536.44	4732.82	4992.37	3764.49	3320.81	4698.66	3790.34	2159.3	3938.99	6308.65	5057.08	5680.38	4984.83	3624.38	242.12	2089	2543.62	2107.95	5095.5	2580.22	3948.33	4309.62	2712.05	2779.75	6497.18	4721.85	2568.31	3396.88	1498.64	6749.24
K00806	uppS; undecaprenyl diphosphate synthase [EC:2.5.1.31]	19241.1	20477	20281	26226.2	21332.2	31838.6	28187.1	24245	20362.9	22438.3	17941.7	21797.1	15922.4	20022.8	22530.7	18232.3	20664.5	22813.4	22549.7	14869.6	22873.1	18250.1	16713.9	26501.8	21585.9	20892.9	1133.92	10882.5	13284.6	9957.01	18520.4	14629.9	18196.2	18501.7	21243.8	10858	24617.5	22707.5	14078.2	20831.8	11145.8	21791.7
K00808	hss; homospermidine synthase [EC:2.5.1.44]	467.83	740.27	393.37	2472.5	2302	1449	819.5	745.5	627.33	793	815.07	785.03	516.2	871	971.33	801	908.16	915	799.67	419	835	424.27	402.46	2998.67	926.33	1004.33	32.2	253.5	255	385.8	1018	1156	871.83	373.5	144	193	690.9	799.2	487.53	341	222	412
K00809	DHPS, dys; deoxyhypusine synthase [EC:2.5.1.46]	5434.9	5216.97	5596.04	5214.98	3254.01	8476.66	8976.43	7778.89	6548.16	7840.5	6973.47	7632.51	6130.06	6270.84	7599.91	7426.41	8462.69	9803.16	8810.08	6640.5	9706.86	5190.23	5468.15	5597.33	7005.17	7067.08	505.15	3741.5	3736.99	4725	5693	3916.34	5608	8134.81	6763.3	5185.33	8810.11	7851.04	5248.32	9710.15	4048.83	8444.01
K00812	aspB; aspartate aminotransferase [EC:2.6.1.1]	21295	22489.5	22205.1	23445.3	20296.8	35159.6	32704.7	28108	23448.2	26740.9	22542.8	25051	18798.7	21964.1	25137.1	23125	26750.7	27417.4	28054.1	19646	28115.9	19677	19341.5	26175.3	24231.1	24658.2	1423.36	12997.5	14943.7	12677.7	18000.8	15020.1	19648.5	22947.2	25982.8	13369.8	30010	27463.8	17981.2	28188	14798	22027.8
K00813	aspC; aspartate aminotransferase [EC:2.6.1.1]	345.07	400.41	339.93	545	101.08	2033.84	425.59	329.24	293.07	337.9	350	304.65	319.45	272.73	353.8	347.5	422.29	315.63	576.2	412.5	665.23	335.5	251.93	233.05	205.13	154.54	9	257.33	131.17	66.91	245.49	99.67	190.5	206.03	202.64	147.67	453.98	372.6	241.83	515.4	142.16	357.96
K00816	CCBL; kynurenine---oxoglutarate transaminase / cysteine-S-conjugate beta-lyase / glutamine---phenylpyruvate transaminase [EC:2.6.1.7 4.4.1.13 2.6.1.64]	15	58	13	4	4	6	2	2	1	12	11	18	8	8	4	19	14	23	10	4	14	50	10	8	24	8	0	21	11	0	15	5	1	1	1	0	45	3	0	8	5	23
K00817	hisC; histidinol-phosphate aminotransferase [EC:2.6.1.9]	24112.8	26265.1	24887.4	30289.6	27964.6	40175.4	35652.9	30571.3	25730.3	28257.8	22829	27442.8	20035	25718.6	28360.1	22663.5	26368	28173	28346.1	18607	28029.6	24269.9	21394.4	35910	29458.8	30058.3	1619.35	14761.3	19851.8	13972.6	22640.2	20124.6	24211.6	22970.9	32038.5	14515.6	31740	28727.6	18533.4	25311.1	14350.9	25237.1
K00818	E2.6.1.11, argD; acetylornithine aminotransferase [EC:2.6.1.11]	8240.48	10225.2	8677.51	11338.6	11174.5	13262	8848.78	7685.17	6549.49	11463.9	9491.04	11159.9	6635.98	9702.08	10770.4	8669.4	11328.3	11329.6	9475.48	5922.26	10485.9	9700.93	7295.66	14457.9	9865.1	8886.29	515.24	4779.5	8396.74	4234.27	8487.86	8623.77	9706.33	7898.43	11411.7	4335.67	12024	11007.1	7100.27	7364.93	4838.47	11728.8
K00819	rocD, OAT; ornithine--oxo-acid transaminase [EC:2.6.1.13]	1797.07	2440.15	1908.66	2300.17	1585	3496.33	3024.25	2537.69	2128.32	3871.67	3505	3304.81	1838.21	2020.12	2432.58	3485.74	4475.4	3828	2750.94	1944.26	2876.84	2078.09	1626.48	3000	3420.33	3914.41	135.5	1726.5	1422.5	1377	2041	1452.61	1733.34	2154.44	1349.77	1601.5	3179.71	2997.5	1975.33	2145.5	1311.04	2522.39
K00820	glmS, GFPT; glucosamine---fructose-6-phosphate aminotransferase (isomerizing) [EC:2.6.1.16]	20372	21268.2	21618.1	26481	19266.4	31702.5	30411.9	26074.8	21867.4	23580.9	18889.3	22685.3	17322.6	20889.8	23886.3	19223.7	21716.4	23461	25527	17362.6	25721.4	19933	17451.2	25125.9	23115.6	22122.3	1230.15	11044.8	13996.1	10810.1	19554.9	15343.7	19180.3	19638.5	24613.8	12648.6	27691.3	24189.6	15268.4	25174.1	12147.4	23646.3
K00821	argD; acetylornithine/N-succinyldiaminopimelate aminotransferase [EC:2.6.1.11 2.6.1.17]	8682.95	8463.87	8824.45	10113.9	6579.95	12461.5	11846.2	10299.1	8503.66	6444.15	5559.96	6342.83	5428.71	6312.35	7270.09	5280.72	6150.79	6153.5	7055.86	4202.39	7504.08	5090.33	5688.36	7059.02	7135.21	6574	333.85	3878.66	4246.29	2886.66	4389.75	3709.26	4708.75	6286.13	3689.96	3241.42	7297.89	8113.02	4545.34	7087.27	3394.37	10198.1
K00822	E2.6.1.18; beta-alanine--pyruvate transaminase [EC:2.6.1.18]	644.25	573.04	648.57	588	251.83	1177.25	720.41	606	547.08	640.75	594.3	554.64	967.4	427.67	971.74	672.17	647.41	719.08	1899.66	812.84	1859.67	525.12	583.52	478.59	1228.59	2350.24	37.73	938.16	554.67	507.3	490.08	358.58	787.75	455.75	502.25	283.17	1110.21	803.15	512.23	1227	238.33	525.16
K00823	puuE; 4-aminobutyrate aminotransferase [EC:2.6.1.19]	6694.49	5572.12	7059.19	4964.15	3363.89	6338.91	6674.93	5682.49	4694.76	6421.39	5017.4	5966.2	5761.66	5674.4	6015.7	5688.37	5828.99	6660.67	9309.49	6643.08	7065.55	5744.82	6682.75	5485	7218.54	6577.13	466.31	2460.83	4613.66	3730.41	6416.34	3404.67	5265.08	7794.23	7026.28	5079.66	8989.94	6833.57	4892.53	7776.8	4348.54	4262.85
K00824	dat; D-alanine transaminase [EC:2.6.1.21]	3802.16	4662.99	3669.84	5417.17	7805	6911.82	5203.33	4447.77	3766.16	4607.92	3890.66	4528.08	2495.3	4367.17	4518.16	3477.08	4482.32	4226.41	3462.28	2240.92	3338.42	4744.34	3101.49	9370.17	5376	6194.83	237	3220.83	5222.67	1823.3	3673.5	5014.11	5686.84	2741.11	9453.44	1643	5069.33	4170.34	3441.83	2956.83	1934.88	2273.56
K00826	E2.6.1.42, ilvE; branched-chain amino acid aminotransferase [EC:2.6.1.42]	31396.8	32895.1	32350.7	34859.4	26019.9	48317.5	42952.8	37099.7	31080.8	35897.8	29902.5	34326.4	27260	31738.7	36692.6	30483	35089.3	37481.7	38896.5	24574.7	39584.3	27070.3	25678.9	32322.5	34637.6	34878.6	1896.9	17738.5	20230.9	16797.4	27730.7	21382.9	27787.5	31541.7	30602.6	18858	41199.6	37897.6	23492.4	36273.5	18060.2	38527.4
K00827	AGXT2; alanine-glyoxylate transaminase / (R)-3-amino-2-methylpropionate-pyruvate transaminase [EC:2.6.1.44 2.6.1.40]	0	0	0	0	0	0	0	0	0	0	0	0	0	0	0	0	0	0	0	0	0	0	0	0	0	0	0	0	0	0	0	0	0	0	0	0	1	1	0	0	12	0
K00830	AGXT; alanine-glyoxylate transaminase / serine-glyoxylate transaminase / serine-pyruvate transaminase [EC:2.6.1.44 2.6.1.45 2.6.1.51]	6181.32	6096.52	6084.48	5692.66	5672.76	7570.49	6817.66	5953.91	4816.38	7020.84	6079.14	6863.92	4911.42	5053.5	5916.4	6459.4	7228.55	8034.24	7738.49	5027.92	7004.85	4429.49	5533.16	6383.64	5614.26	6875.58	256.48	3604.82	3070.34	2367.1	3812	3766.34	4138.08	5531.23	7177.57	3875.66	9384.97	8188.8	5690.94	7000.49	3533.5	3988.09
K00831	serC, PSAT1; phosphoserine aminotransferase [EC:2.6.1.52]	8072.09	10090.5	8279	10987	11275.1	15329	11695.8	9867.54	8539.35	10702.7	9625.26	10099.5	6493.8	9526.39	10082.3	8608.33	11272.9	10169.4	10312	6465.43	9009.44	8667.94	6398.31	13234	9478.73	10533.1	521.03	5978.16	7247.67	4475.14	7929.11	8223.2	9618.59	7263.09	12508.8	4332.34	10570.7	9716.04	7013.05	7510.73	4753.2	6909.85
K00832	tyrB; aromatic-amino-acid transaminase [EC:2.6.1.57]	1612.65	1708.27	1457.07	1992.58	1868.07	3312.92	2063.35	1818.73	1422.66	1110.06	1283.71	1103.73	1167.89	1343.24	1486.38	1027.15	1446.96	1112.6	1640.58	781.84	1273.52	632.53	817.7	1228.8	672.96	1378.96	57.23	979.33	995	436.41	590.92	736.42	478.42	953.11	1190.71	700.67	1600.15	1249.66	1081.14	731.73	832.33	438.41
K00833	bioA; adenosylmethionine---8-amino-7-oxononanoate aminotransferase [EC:2.6.1.62]	5412.23	7172.24	5716.79	7557.91	8490.24	8801	8235.59	6976.31	6010.23	8057.66	6592.13	7494.6	4197.3	6447.91	6979.29	5765.34	7652.45	6864.21	7363.36	4354.92	6668.57	7102.34	4988.73	11189.5	7178.88	7527.04	402.36	3716.66	5693.67	3355.21	6819.41	7114.76	7570.09	4094.45	10171.8	2854.84	8970.6	7180.38	5265.27	5640.23	3810.99	5215.29
K00835	avtA; valine--pyruvate aminotransferase [EC:2.6.1.66]	272.43	249.92	333.64	866.08	156.45	1562.34	776.33	645	545.7	231.73	222.58	849.36	349.28	237.73	414.8	224.25	234.45	1324.13	513.2	338.67	614.4	207.25	209.76	156.88	294.04	472.21	7	155	140	129.91	191.66	129.16	144.49	626.33	313.97	370.67	413.64	449.18	133.99	415.23	333.33	367.46
K00836	ectB, dat; diaminobutyrate-2-oxoglutarate transaminase [EC:2.6.1.76]	3577.93	3096.05	3441.17	3099.41	1790.88	5555.5	4033.67	3534	2936.24	3037.07	2817.53	3263.79	3613.2	3986.33	4247.8	2499.65	3197.66	3487.65	4464.33	3208.6	3784.6	3564.6	3492.64	4555.35	6358.97	7654.02	365.19	2643.99	4482.67	2836.88	2479.25	2633.58	3309.99	5400.65	11894.8	4435	3803.21	3290.18	2482.33	3415.91	2405.49	2783.25
K00839	pucG; (S)-ureidoglycine---glyoxylate transaminase [EC:2.6.1.112]	21.76	14.8	27.72	6	0.12	2	6	4	3.25	8.75	5.37	9.62	14	5.5	40.5	7.87	13.39	7.62	12	9.5	18.5	8.5	24.43	3	10.62	4.88	0	51.5	10	10.38	9.5	13.61	40.5	207	20.5	23	23.87	16.33	10.98	12	5.38	2
K00840	astC; succinylornithine aminotransferase [EC:2.6.1.81]	0.4	0.84	2.28	0	0.24	1.67	0	0	0	3.14	0.83	1.29	0.5	1.4	0.8	1.39	2.38	1.1	0.25	0	3.35	0	0.86	1	6.24	0.76	0	6	0	10.29	0	1	6	0.5	0.3	2	2.36	7.1	4.83	0.4	0	0.75
K00841	patA; aminotransferase [EC:2.6.1.-]	51.31	53.07	67.29	53.83	50.66	75.33	159.96	103.01	100.12	61.12	52.79	35.86	17.39	17.2	51.58	58.42	65.83	41.58	28.11	36.5	69.87	32	41	19.83	61.77	56.7	13	61	80	26.6	52.7	39.78	131	24.3	60.11	11	38	42	59.83	34	56.88	81.96
K00842	E2.6.1.-E, patB; aminotransferase [EC:2.6.1.-]	1.33	0.33	1	0	0	0	0	0	0	0.67	0.33	1.33	0	0	0	2	2	2	0	0	0	0.67	0.33	0	0	0	0	0	0	0	9	0	1	0	0	0	1	2	1	0	0	0
K00844	HK; hexokinase [EC:2.7.1.1]	8.2	24	13.2	11	22.5	28.5	29	30.5	28.5	282.5	243	172	37.3	5.9	25.5	298.5	332.5	253	49	24.3	51.8	92.5	21.5	121	438	493.5	3	38	5	44.7	27	24	70.5	37.5	12	3	46.5	92.2	44.2	11	31	14
K00845	glk; glucokinase [EC:2.7.1.2]	19339	20379.5	20304.8	21390.3	17560.5	28208.9	23541.7	20243.1	17012.8	21890.6	17810.3	21454.5	14990.6	19222.2	21748.4	18120.5	20755.7	22693.2	21239.6	13948.2	21600.1	18594.5	16143.6	24267.2	22356.9	22379.1	1099.46	10859.5	13227.1	9759.73	17768.9	14334.5	18034	17775.2	20631.5	11672.1	24518.1	23260	14270.1	18646.6	10675.8	20023.6
K00846	KHK; ketohexokinase [EC:2.7.1.3]	261	313	301	298	210	563	387	310	297	452.5	232	369	260	592	575	181	232.5	199.5	230	168	255	1151	436	1235	962	1558	59	880	1079	367	230	594	472	441	7644	298	1634	735	477	545	119	445
K00847	E2.7.1.4, scrK; fructokinase [EC:2.7.1.4]	11076	11923.2	11936.2	12663	12540.6	18928.1	15166.1	12900.8	10773.3	15789.8	12476.6	15181.4	9629.15	13008.4	14237.8	13261.1	14738.6	16366.6	13732.1	9358.09	13366.7	13216.7	11563.6	17480.2	15735.8	16563.6	730.69	7326.67	8949.99	6842.28	11657.3	8862.65	12320.2	12531.2	17062.1	7796.18	17010.1	14502.6	9726.6	11978.7	6161.09	9150.73
K00848	rhaB; rhamnulokinase [EC:2.7.1.5]	621.75	794.37	924.27	1032.99	1341.13	1133.67	797.83	736.49	556.17	1545.48	1038.06	1270.21	481.67	846.72	841.79	1382.2	1335.51	1384.1	780.99	1043.5	1010.12	1693.66	1248.25	1199.5	1486.29	1518.38	30.82	665.16	464.33	494.91	801.16	483.11	581.83	319.15	269.79	220.16	1604.65	1129.56	462.83	1187.89	728.88	1016.42
K00849	galK; galactokinase [EC:2.7.1.6]	3699.73	4466.89	4077.85	7550	3817.45	7866.66	6401.62	5538.73	4723.73	6488.76	5176.28	5588.22	4579.34	5473.11	5990.71	5772.19	6434.03	6581.91	5478.91	3375.5	5713.73	4338.67	3489.51	4853.71	4262.56	4718.58	223	2538.83	2495.67	2475.01	5726.53	2608.12	4055.17	5163.2	3390.8	3226	6106.44	5455.51	2897.28	4355.9	2321.71	8019.65
K00850	pfkA, PFK; 6-phosphofructokinase 1 [EC:2.7.1.11]	16679.6	18393.1	17777.2	20437	17833.8	25191	22406.3	19015.4	16302.9	20596	16462.5	19800.3	13413.9	17552.1	19710.3	15971.9	19510.2	19746.7	20454.3	12005.8	19281	16825.9	13994.1	21985.8	17142.6	15411.9	822.11	8729.5	10828.8	7534.66	15602.6	12275	15290.8	14999.6	16293.4	7674.76	21003.5	19920.6	12839.4	16328.4	8943.91	18942.4
K00851	E2.7.1.12, gntK, idnK; gluconokinase [EC:2.7.1.12]	1369.67	1706.23	1567.66	2178.33	1365.95	4502	2596.58	2135.94	1790.28	1912.14	1448.81	1716.23	1127.73	1042.51	1344.21	1666.29	1553.58	1722.51	1973.35	1361.84	1621.86	1777.19	1587.98	2048.97	2258.38	2127.45	78.53	1054.16	937.67	872.37	1003.75	876.87	1182.09	1083.69	1057.82	490.17	2636.96	2267.7	1103.8	1290.23	869.04	931.8
K00852	rbsK, RBKS; ribokinase [EC:2.7.1.15]	13593.3	11373.1	14568.3	14703.2	9641.5	17216	18510.3	15994	13117.3	14961.1	10866.2	14536.2	11467.5	13439.7	14724.5	13213.3	12632.8	16862.3	16615.8	10605.4	15996.5	11568.6	11549.6	11805.9	13855	14468	771.18	7060.49	7439.66	6831.41	12436.1	6942.03	10138.2	14050.1	12124.3	8901.16	17178.8	14396.8	8716.5	14990.2	7003.04	14497.1
K00853	araB; L-ribulokinase [EC:2.7.1.16]	515.76	622.33	522.81	744.34	656.12	1613	1052.5	811.33	741.28	997.97	1004.66	828.29	454.33	530.34	613.8	1117.55	1314.54	1125.93	661.58	600.67	800.35	570.33	515.26	784.21	750.12	788.21	33.5	662	386	405.41	409	203.61	518.17	453.17	305.63	310	839.82	1221.43	622.83	1085.9	485.38	754.75
K00854	xylB, XYLB; xylulokinase [EC:2.7.1.17]	6743.66	7460.09	6942.31	7919.76	5539.07	10700	7356.33	6433.13	5470.5	6909.71	6003.88	6692.65	5574.27	6874.33	7231.89	6117.87	6955.57	7171.13	7571.64	4567.68	7099.12	6341.35	5424.16	5970.93	7642.58	7012.52	293.6	3054.66	3425.74	2840.46	6959.5	4499.62	5320.5	6121.1	4769.29	4173.67	7926.44	7835.93	4251.51	6301.83	3646.97	10306.3
K00855	PRK, prkB; phosphoribulokinase [EC:2.7.1.19]	2154.43	2722.34	2219.65	2184.67	3789.61	4109.67	2555.33	2089.75	1820.54	2633.98	1747.59	3739.86	1716.62	2343.57	2472.71	1504.17	1909.8	4029.63	2683.12	1747.26	2183.98	3582.75	2284.85	5168.55	4136.2	4421.13	140.33	1518.83	3776.67	1076.21	1963.92	3032.58	3849.07	2108.91	8849.55	1327.5	3334.06	2931.09	2097.67	1898.14	1434.33	1689.62
K00856	E2.7.1.20, ADK; adenosine kinase [EC:2.7.1.20]	2155.42	2781.83	2234.67	909.5	3283.5	2406.91	1747.75	1380.25	1287	2596.5	1641.25	2677.42	1592.33	2627.5	2252.17	1525.5	1843.58	2209.25	2745.42	1615.25	1240.75	3725	2236.67	5264.92	2830.17	2148.33	152	1360.33	3746.17	1035.83	2111	3104	3861.34	1317	8202.25	1510	3300.67	2378.25	2021	1778.58	1039	1924
K00857	tdk, TK; thymidine kinase [EC:2.7.1.21]	9412.22	8529.52	10036	11071.7	6889.78	13969	15360.4	13059.8	10880	11078.4	9039.2	10353.3	6893.87	8132.26	9270.17	9664.59	10778.7	11441.3	9974.43	6960.09	10289.8	7111.21	7538	9000.59	5832.06	6464.04	420.12	4880.5	4385.62	3824.26	7211.03	4029.29	6286.17	8045.52	5812.65	5101.92	11357.8	10280.7	6380.35	9628.62	5283.59	9560.38
K00858	ppnK, NADK; NAD+ kinase [EC:2.7.1.23]	23078.8	23663.6	24035.7	27204.9	20945.1	36558.6	34112.2	29324.6	24644	27409.7	22256.4	26964.7	20457.1	24095.4	27524.4	23060.6	25862.7	29839.8	29118.5	19742.8	29674.6	21212.2	20609.8	27523.3	26445.5	26023.3	1506.61	13357.6	15968.8	13320.8	21566.4	16511.3	21693.7	25211.4	27194.2	15190.6	31345.8	28485.2	17894.8	28317.1	14464	27168.2
K00859	coaE; dephospho-CoA kinase [EC:2.7.1.24]	14735.5	16258.3	15623.8	19880.9	15866.9	23414	21421.9	18292.3	15379.9	16442	13312.9	16043.7	10890.8	14510.3	15924.2	12838.5	15359.8	15896.6	15887.8	10109.8	15322.4	13721.6	11644.8	19812.8	15260.1	14812.6	771.48	8223.16	10602.8	6702.26	13381.1	11119.4	13766.6	11789.1	15745.7	6619.09	16623.1	16068	10104.4	13996.6	8104.08	16446.2
K00860	cysC; adenylylsulfate kinase [EC:2.7.1.25]	4152.09	5799.32	4441.63	4673.83	5638.12	7241.34	5977.67	5101.66	4195.27	5628.16	4781.66	5823.95	3542.44	3429.91	4094.13	4931.59	5602.94	6896.72	5940.45	3989.33	5693.32	3904.32	4908.42	5491.05	4097.95	4390.05	242.83	2439.5	2144	2205.41	4449.5	2428.73	3742.66	3797	2237.62	1493.67	7923.07	7318.25	4481.77	5331.57	2773.59	4327.63
K00862	eryA; erythritol kinase (D-erythritol 1-phosphate-forming) [EC:2.7.1.215]	15	9	13	0	2	1	0	0	0	9	7	10	8	19	4	8	11	7	33	56	62	22	17	22	9	21	2	7	0	33	90	251	38	1	1	0	9	7	7	9	0	3
K00863	DAK, TKFC; triose/dihydroxyacetone kinase / FAD-AMP lyase (cyclizing) [EC:2.7.1.28 2.7.1.29 4.6.1.15]	213.76	189.55	168.39	50.84	74.12	115.5	88.66	67.16	57.66	143.47	185.33	94.29	110.01	95.84	76.99	108.29	243.45	129.33	206.24	183.35	220.25	97.33	47.93	30.16	84.46	173.21	13.33	185.83	89	217.35	201.67	30.17	93	208.67	43.66	8	173.12	207.24	104.5	155	46.5	90.91
K00864	glpK, GK; glycerol kinase [EC:2.7.1.30]	15758.8	15481.3	16759.9	19040.9	12867.8	22550.6	19418.6	16706	13808.6	16456.3	13370.3	16260.8	11622.9	14619	16229.7	13414.5	15091.4	16876.4	16081.2	10688.3	16086.1	13262.2	13068.1	17075.4	15881	15638.6	879.7	7905.82	9404.95	7477.84	14139.7	10146.5	12474.3	15274.1	11200.2	9103.08	18178.3	17386.9	10724.2	14356.1	7845.91	15287.5
K00865	glxK, garK; glycerate 2-kinase [EC:2.7.1.165]	2536.57	2529.95	2874.39	4548.58	2342.9	5051.41	3519.37	3148.39	2748.49	3210.9	2171.15	2895.58	2345.54	3095.94	3225.75	2444.11	2544.95	3031.94	2490.27	1508.67	2721.87	3362.04	2336.88	2547.88	4683.27	4347.04	141.73	1439.49	1727.17	1291.92	2272.45	2083.2	2236.43	2891.72	1496.96	2040	2980.48	2881.85	1339.41	2491.55	1527.54	5972.2
K00867	coaA; type I pantothenate kinase [EC:2.7.1.33]	461.93	415.67	450.23	255.5	255.66	465.42	431.03	382	346.53	667.18	630.46	709.61	336.51	518.43	435.38	537.55	734.71	810.35	334	417.33	323.14	584.17	343.1	670.71	1471.39	2123.58	42	891.33	589	466.81	707.53	707.45	970.67	447.67	307.63	841	619.19	572.51	358.33	363.24	251.71	762.48
K00868	pdxK, pdxY; pyridoxine kinase [EC:2.7.1.35]	437.18	327.51	418.07	445	319.48	653.59	788.06	665.49	592.07	599.61	514.64	540.98	494.59	391.8	660.34	586.85	621.76	666.7	779.27	388	863.11	447.11	367.31	311.5	1187.61	1512.49	36.2	940.83	609.5	572.82	370.73	397.45	824.5	677.61	931.38	508.5	789.83	634.48	361.79	785.64	281.21	512.94
K00869	E2.7.1.36, MVK, mvaK1; mevalonate kinase [EC:2.7.1.36]	5120.91	4876.06	5354.88	7489.16	5228.63	9413.83	8562.29	7379.48	6232.91	8237.95	6911.61	7557.99	6324.99	6755.2	7771.74	7770.08	8473.12	9392.83	9066.41	5769.92	8690.55	5170.24	5376.48	7624.24	7347.03	7260.36	466.32	3387.33	3382.66	4422.77	7765.53	4116.67	6060.58	8036.57	7499.73	4874.66	8571.05	7321.05	4858.91	8470.15	4147.33	6912.99
K00870	E2.7.1.37; protein kinase [EC:2.7.1.37]	4.16	22.66	7.22	10	17.01	11.67	31	27.99	23.17	34	77.99	44.5	24	17.32	50.33	40.99	118.64	73.17	53.66	34.5	95.01	9	21.4	35.33	45.51	88.16	2.49	19.66	52.83	21.5	89.66	145.33	75.33	65.98	27.66	6.99	29.65	25.39	16.17	51.32	48.83	55.67
K00872	thrB1; homoserine kinase [EC:2.7.1.39]	10850.9	9972.23	11738.6	13590.3	7822.92	16760.7	17183.3	14751.4	12288.9	12931.4	10135.5	12393.3	9756.68	10694.9	12156.3	11120.6	11823.7	14114.9	12795.7	8618.3	13392.2	9412.38	9527.66	10989.2	12347.2	10724.9	715.44	5695.49	6232.12	6314.46	10108.4	6128.28	8878.58	12765.4	9754.4	7679.74	13756.5	13116.8	7550.07	12536.9	6000.92	13940.1
K00873	PK, pyk; pyruvate kinase [EC:2.7.1.40]	19418.5	20436.5	20300.5	23852	18615	30258	28528.6	24505.2	20566.2	22106.6	17924.2	22101.9	15825.6	19166.6	21884.5	17957.2	20806.4	23488.7	22967.9	14802.2	22799.8	18321.5	16659.3	23950.9	22040.3	22092.7	1182.33	11152.8	13653	10365.2	17917.9	14128	17958.2	18663.9	21341	11082.8	25549.9	23568.5	14521	20801	11155.9	22029.2
K00874	kdgK; 2-dehydro-3-deoxygluconokinase [EC:2.7.1.45]	7327.3	6947.13	7345.86	7004.21	5538.13	11699.9	11453	9805.17	8407.83	10076.1	8933.77	9456.65	7792.25	9202.27	10047	9551.86	10798.1	11423.4	10554.2	7135.01	9812.22	6743.24	6744.42	8162.71	11623.8	12956.5	608.16	5148.65	5348.61	5741.04	5850.74	4504.03	6407.32	9776.88	7887.12	7297.07	11095.3	9485.67	6383.13	9240.92	5358.25	6582.21
K00875	E2.7.1.47; D-ribulokinase [EC:2.7.1.47]	13	18	18.5	0.5	5	1	1.5	0	1	9.5	15.5	9	1	3	14	12.5	11.5	10.5	5	35	11	60	9.5	17	562	821	4	17	0	3	7	8	10	0	1	5	41.5	14.5	15	5	0	16
K00876	udk, UCK; uridine kinase [EC:2.7.1.48]	6758.63	7259.67	7905.67	11280.3	8371.32	14740.2	11770.1	10123.2	8605.44	11518.9	8784.19	11113.1	7190.59	8200.75	9709.13	10467.2	10714.6	13506.6	10172.7	6876.22	10570.7	8102.09	7265.08	10656.7	6108.48	5359.17	334.74	3661.5	3486.24	3380.71	5618.03	4231.79	6033.08	8447.95	6087.43	4792.67	11775.9	9308.43	5706.55	8725	4662.97	8074.48
K00878	thiM; hydroxyethylthiazole kinase [EC:2.7.1.50]	3222.53	2564.21	3267.81	5174.63	3873.38	4864.12	4363.58	3766.12	3204.62	3022.07	2550.34	2997.78	2488.49	3653.96	4209.5	2568.97	2847.78	3254.09	3811.9	1736.48	3909.09	1900.13	2471.1	4026.46	1858.63	1223.92	135.78	1340.66	1425.12	1533.86	3506.92	3001.37	2174.84	3287.49	2221.58	1666.75	3759.49	2946.7	2271.06	2771.03	1353.25	2250.5
K00879	fucK; L-fuculokinase [EC:2.7.1.51]	0.43	0.91	0.31	2.67	3.67	25.84	49.5	39.67	30.33	0.98	1.5	1.79	11	0.73	4.8	2.39	1.91	2.27	31.5	7.83	12.27	0	0.43	0.5	2.17	0	0	4.33	0	3.53	0.33	0.17	0.67	1.17	0.47	0	2.53	1.27	0.83	17.57	1.83	16.33
K00880	lyxK; L-xylulokinase [EC:2.7.1.53]	5.55	6.03	5.31	2.67	4.67	27.17	49.5	39.67	30.33	9.31	5.62	5.79	19	7.73	6.8	5.72	4.91	4.27	62.5	59.83	72.27	26	7.43	5.5	16.17	21	1	7.83	6	20.2	0.33	5.17	5.67	2.17	15.47	2	10.36	5.6	2.95	26.57	1.83	19.33
K00881	alsK; allose kinase [EC:2.7.1.55]	0.12	0.12	0	0	0	0	0	0	0	3.14	0.83	1.29	0	1.4	0.8	0.39	1.24	0.1	0	0	0.1	0	0	1	3	0	0	6	0	1.2	0	0	0	0.5	0.3	2	1.61	1.1	0.83	0.4	0	0
K00882	fruK; 1-phosphofructokinase [EC:2.7.1.56]	1846.66	2281.79	1931.68	4354.38	2026.99	7098.04	5279.32	4447.63	3991.04	2610.3	2193.62	2644.9	3458.63	4288.1	4540.5	2264.2	2545.18	3077.34	3157.13	1778.59	3643.41	2172.82	1805.63	2796.92	4339.09	5027.9	303.64	1597.82	2612.45	2450.86	2249.31	2132.03	2364.25	4588.75	2189.49	3790.24	2196.45	2552.54	1657.42	2847.17	1467.25	6000.06
K00883	dgoK; 2-dehydro-3-deoxygalactonokinase [EC:2.7.1.58]	1766.52	1879.21	1585.95	2342.67	2477.57	3882.5	2686.33	2287.75	1897.67	1279.89	1544.03	1372.53	1376.25	1497.07	1732.38	1320.63	1736.38	1550.09	2006.08	1012.84	1823.6	678.25	905.62	1655.67	1419.83	2119.34	76.33	1347.66	1168.17	772.96	616.92	863.25	846.42	997.75	1180.05	665.5	1904.85	1985.18	1301.87	1010.15	692.5	633.91
K00884	NAGK, nagK; N-acetylglucosamine kinase [EC:2.7.1.59]	278.43	252.84	312.14	330.67	52.91	339.51	517	420.67	345.45	108.65	268.67	136.46	52.67	50.73	85.8	106.22	265.21	89.27	101.75	66.83	118.02	125.5	71.93	199.88	76.08	63.76	6	27.83	72	52.29	61.33	7.17	56	38.5	42.14	11	177.86	149.1	226.83	58.57	48.83	51.08
K00885	nanK; N-acylmannosamine kinase [EC:2.7.1.60]	3.62	1.62	3.67	2.67	3.79	25.84	49.5	39.67	30.33	2.98	4.17	3.62	16.67	0.73	10.8	3.05	5.07	2.27	56.08	11.83	75.52	2.5	5.5	1.5	6.79	1.38	0	0.83	0	16.91	0.33	0.67	3.67	12.17	0.47	0	6.86	6.6	2.83	20.57	2.83	17.75
K00886	ppgK; polyphosphate glucokinase [EC:2.7.1.63]	686.66	1360.65	629.5	1407.99	1000.33	2081.08	1809.34	1492.66	1283.08	1551.83	1367.66	1223.17	743.82	777.34	1043	1472.33	1617.32	1412.75	1231.67	1329	1607.17	633.5	833.5	1779.17	642	787.5	64.5	1066	643	908	862.5	710.17	754	815.83	495.49	446.17	1744.31	1801.49	964.66	1253.17	502.5	1062.17
K00887	dgkA; undecaprenol kinase [EC:2.7.1.66]	160.5	218.16	210.08	135.33	85.37	169.33	124.53	94.44	81.16	192.62	230.62	149.23	82.72	89.14	118.08	166.58	282.99	175.58	103.61	102	201.54	401.17	138.83	88.83	526.27	584.7	9	108.5	62.5	59.6	267.2	171.28	165	248.44	77.61	31.5	303.38	251.75	185.94	148.5	131.38	141.96
K00889	PIP5K; 1-phosphatidylinositol-4-phosphate 5-kinase [EC:2.7.1.68]	0	0	0	0	0	0	0	0	0	0	0.33	0	0	1.67	0	0.33	0	0	0	0	0	0	0	0	0	0	0	0	0	0	0	0	0	0	0	0	0.33	0	0	0	0	0
K00891	E2.7.1.71, aroK, aroL; shikimate kinase [EC:2.7.1.71]	18806.3	20130.8	19481.1	22169.2	17989.7	29782.1	26981.2	23198.1	19452.6	21680	17772.4	21011.3	14972.2	18428.4	21344.8	17418.9	20565.3	21720.3	21997.9	14480.7	23369.6	17203.6	16193.9	23905.1	20074.9	19329.7	1138.3	10630.5	12905.5	9799.37	17447.4	13794	17127.3	18101.8	20880.6	10847.9	25122.3	23052.2	14515.2	20875.5	11091.2	21142.6
K00892	gsk; inosine kinase [EC:2.7.1.73]	4.26	1.79	2.14	2	1.12	8	47.33	38	46.24	7.39	8.83	5.53	2.62	8.57	0.8	6.01	8.8	3.8	8.37	15	5.56	4	1.09	9.93	5.62	0.88	0	9	8.17	9.41	0	0.67	4	0.5	0.3	2	8.48	9.1	6.17	4.4	0	4.13
K00895	pfp, PFP; diphosphate-dependent phosphofructokinase [EC:2.7.1.90]	573.5	406.33	731	777	777.5	565	419.5	367.5	326	896.67	655	862.83	350.67	1543.17	1415.67	694	727.5	744.5	606.5	356.34	622.67	741	444	566.5	1131.5	1096	32.5	458	194	336.5	472.5	490.5	413.67	438	328	396.5	536.83	566	555.5	1126	486.33	642.83
K00897	aphA; kanamycin kinase [EC:2.7.1.95]	7.5	8.33	17	4	2	6	4	5	2	8	7.34	8.33	14	3	26	2.5	5.16	4	26.33	0	13.17	11.17	1.33	1	3	3	1	112	2	113	23	5	7	1	6	0	7	2	1.33	8	1.5	4.67
K00899	mtnK; 5-methylthioribose kinase [EC:2.7.1.100]	227.59	180.22	221.89	240.67	68.45	393.67	220.5	166.11	137	181.63	240	161.74	126.89	127.44	126.49	188.74	306.37	256.12	123.36	167.84	176.92	283	129.77	108	701.79	914.21	11.33	159.83	102.5	72.38	76.67	63.11	85.5	299.44	55.61	51	321.04	332.07	180.5	199.33	199.38	271.14
K00901	dgkA, DGK; diacylglycerol kinase (ATP) [EC:2.7.1.107]	6256.34	5800.16	6937.3	7788.05	6323.07	9145.04	11508	9640.66	7998.44	7427.74	5463.97	7338.85	3667.58	4525.36	5098.33	5232.08	6243.29	6877.21	6104.89	3866.81	5230.21	7216.72	5668.91	9277.61	5864.88	6250.59	316.81	3644.32	4076.46	2856.16	5350.08	4044.92	5595.58	3869.66	11179.1	2291.92	7332.18	6077.06	4255.74	4973.28	3186.04	3779.74
K00903	epsB; protein-tyrosine kinase [EC:2.7.10.2]	0	0	0	0	0	0	0	0	0	0	0	0	0	0	0	0	0	0	0	0	0	0	0	0	0	0	0	0	0	0	0	0	0	0.5	2	0	0	0	0	0	0	0
K00906	aceK; isocitrate dehydrogenase kinase/phosphatase [EC:2.7.11.5 3.1.3.-]	1225.51	1643.32	1109.84	403.17	1973.45	946.92	540.58	440	419.92	1198.39	984.4	1390.55	504.03	466.24	549.54	932.47	1280.81	1447.42	982.07	422.59	709.94	913.85	1313.32	2166.92	861.54	1081.96	25.53	383.33	324.17	233.91	414.42	388.92	512.25	213.25	120.55	231.5	2051	1809.55	1681.21	595.73	303.33	421.84
K00912	lpxK; tetraacyldisaccharide 4'-kinase [EC:2.7.1.130]	11604.6	12736.8	11999.7	13623.2	14928.9	16760.2	16650.8	14270.1	11863.4	11989.5	10091.4	11874.6	7364.93	10076.4	11230	9051.83	11826.8	11077.7	11897.4	7057.01	10844.6	10030.4	9227.54	15739	10352.4	10747	574.06	6404.99	8235.34	4727.71	8523.41	8274.09	9850.76	6736.45	11874.1	3455.67	12819.8	12228.3	8611.73	9933.73	6308.32	8993.62
K00917	lacC; tagatose 6-phosphate kinase [EC:2.7.1.144]	478.66	715.66	455	2737.66	1017.17	2568.99	1411.16	1179.66	1076.5	747.01	568.91	714.75	1179.84	1532.27	1600	685.33	664.83	1033.99	817.25	360.5	1172.79	338.67	371.83	613.83	414.67	535.17	57	522.5	713.5	364	467	533.17	545.17	1616.5	499	791	562.13	892.17	403.33	927.83	304	4394
K00918	pfkC; ADP-dependent phosphofructokinase/glucokinase [EC:2.7.1.146 2.7.1.147]	3.5	4.25	5.5	304	59.25	320.5	255	242.75	186.75	33.5	33	20.75	36.25	45.5	44.75	31.75	34.75	28.25	50	4.75	26	5.5	28.5	10.25	10.25	12.25	1	30.5	46.5	12.5	4	61	52.75	116.25	101.75	7	60.25	80.5	27.25	26	13	10.75
K00919	ispE; 4-diphosphocytidyl-2-C-methyl-D-erythritol kinase [EC:2.7.1.148]	13982.2	15256.8	14574.5	15852.7	13232.2	20600.1	19605.2	16744.2	14076	14292.7	11250.7	14249.5	9745.21	12958.1	14610.4	10776.7	12721.5	13693.3	14024.6	9296.64	14585.2	12419.6	10833.6	16171.2	14025.4	13635.2	707.48	7600.99	10015.5	5923.99	10160.4	9951.03	11874.6	10940.9	14081.9	6154.42	16246.1	15489.1	9475.09	13060.8	7117.58	15071.8
K00924	E2.7.1.-; kinase [EC:2.7.1.-]	3386.49	3408.98	3578	1627.98	2713	3424	2040.99	1505.65	1263.14	4362.54	4564.44	3944.52	2538.17	3662.67	3408.66	4209.3	5743.14	4277.17	3934.49	3288.15	4286.35	6203.77	3640.18	3619.35	5536.62	5643.03	175.31	2388	3417	1073.67	3063.5	2433.69	2569.49	1844.84	9304.63	1670	5956.24	5258.96	3581.31	4423.18	2313	3879.86
K00925	ackA; acetate kinase [EC:2.7.2.1]	11269	12852.5	11654.3	14959.4	14525.9	16801.1	17360.7	14738	12429.7	12426.7	10280.2	12397.8	7874.28	9747.49	11299.6	9825.83	11932.3	12491.4	12446.2	7667.98	11745.8	9955.66	9174.96	18053.6	10902.6	11467.8	604.51	5541.32	8380.96	4957.03	8483.78	8190.7	9927.58	7483.66	12294.5	4491.42	12545.6	12484.4	7886.38	10229.9	6313.25	9150.31
K00926	arcC; carbamate kinase [EC:2.7.2.2]	2161.65	2231.77	2891.76	3306.22	2349.24	4099.63	3792.5	3286.93	2764.83	3746.95	2506.33	3248.77	2704.32	2489.68	2971.02	3206.89	3008.22	3641.05	4126.54	2460.09	3361.81	2973.08	2782.04	2350.93	2987.41	2945.13	189.15	1433.66	1601.62	1775.94	3128.5	1578.67	2663.33	2556.55	2193.57	1231.25	3768.38	3300.99	1818.52	3626.24	1308.04	2848.03
K00927	PGK, pgk; phosphoglycerate kinase [EC:2.7.2.3]	18934.4	19991.3	19809.1	23529.9	18451.6	30001.5	28207.5	24189.9	20333.2	21915.9	17713.1	21233.7	15670.8	19297.8	21819.4	17928.3	20554.4	22320.6	22581	14874.8	22856.6	17462.9	16135.6	23641.2	20850.7	20226.3	1161.8	10829.8	13253.1	10210.8	17756.9	13965.7	17742.9	18304.2	21357.4	10811.1	24580.4	22603.8	14166.5	21296.9	11153.4	21791
K00928	lysC; aspartate kinase [EC:2.7.2.4]	20447	21632	21794.9	25599.1	20111.6	34249.4	29796.7	25631.5	21473.1	25409.1	20615.6	24154	17407.1	21080.8	24170.8	21195.3	24318.3	25923.4	25109.9	16413.7	25333.7	19588.8	17922	25491.1	22681.3	22068.7	1225.04	11860.2	14142	10973.5	18787.1	14537.6	19102.7	20416.6	22511.3	11528.6	27527.7	25005.7	15656.5	23402	12196.6	23243
K00929	buk; butyrate kinase [EC:2.7.2.7]	756.65	839.28	796.25	642.76	203.79	1458.74	848.43	725.82	646.38	1165.08	854.75	1055.95	732.29	719.03	881.59	1111.58	1125.33	1276.25	951.68	585	771.17	532.26	578.33	482.76	730	817.76	35.74	299.5	231.74	282	844.5	334.11	596.66	673.56	523.61	368.5	708.51	889.68	677.7	711.26	307.64	327.47
K00930	argB; acetylglutamate kinase [EC:2.7.2.8]	14171.2	15457.2	14840.2	14767.2	12968.3	20447.6	17772.9	15295.9	12707.6	14828	12368.3	14739.2	9770.71	12895.5	14451.3	11517	14357.4	14507.8	14279.6	8874.81	14719.5	12576.1	10998.2	16362	14082.5	13457.1	699.48	7741.83	9861.12	6132.76	12025.6	9757.87	12705.8	10781.8	15099.3	6158.76	16720.9	15896.7	9926.9	12655.1	7550.08	15284.6
K00931	proB; glutamate 5-kinase [EC:2.7.2.11]	16336.5	17358	17321.7	18666.9	16235.6	23777.5	21470.5	18533.8	15387.2	18405.7	14698.4	18057.9	13038.6	16771.1	18906.8	14840.9	16912.8	18503.6	18112.4	11079.8	18563.9	15402.4	13630.2	20497.8	18824.6	17989.8	963.81	9098.66	11765.8	8094.43	15135.8	12057.5	15050.4	15533.1	19457.5	9428.92	20592	18669.9	11886.1	16394.4	8450.79	17900.2
K00932	tdcD; propionate kinase [EC:2.7.2.15]	0.14	0.29	0.14	0	0.12	1.67	0	0	0	0.14	0.71	0.29	0	0.4	0.8	0.39	1.24	0.1	0	0	0.1	0	0.43	0	2.62	0.38	0	0	0	3.91	0	0.5	3	0.5	0.3	0	1.11	1.1	0.71	0.4	0	0
K00933	E2.7.3.2; creatine kinase [EC:2.7.3.2]	0	0.33	0.33	0	0	0	0	0	0	0.67	0	0.83	13	17.67	6.67	0	0	0	26	23.67	25.67	0	0	0	2	4	0	5	0	0.5	2.5	0	3.67	0	0.33	0	0	0	0	101	22.33	124.33
K00934	E2.7.3.3; arginine kinase [EC:2.7.3.3]	0	0.33	0.33	0	0	0	0	0	0	0.67	0	0.83	13	17.67	6.67	0	0	0	26	23.67	25.67	0	0	0	2	4	0	5	0	0.5	2.5	0	3.67	0	0	0	0	0	0	101	22.33	124.33
K00936	pdtaS; two-component system, sensor histidine kinase PdtaS [EC:2.7.13.3]	11844.7	12959.2	12104.7	11528.7	11693	18050.3	14259.3	12322.1	9974.64	18525.5	19452.7	16409.8	10578.5	12520.1	15034.6	16326.7	24966.9	17925.2	16027.5	7602.83	15990.9	10956.8	9070.44	13313.3	9732.28	11805.3	624.06	8401.5	8776.57	5180.8	10646.9	8209.52	8575.33	11053.7	9211.47	5876	18782.9	16611.1	11415	10631.5	6467.75	10483.3
K00937	ppk; polyphosphate kinase [EC:2.7.4.1]	8618.83	10693.7	8552.06	11561.2	10855	18265.8	13579.8	11534.1	9808.85	13174.3	12121.3	12697.9	8171.81	10954.7	11986.4	11621.5	14713.5	14258.1	11307.8	7681.76	11692	9927.92	7715.12	15532.1	12189.3	13957.3	638.68	6907.32	8484.33	5816.71	9704.74	8283.25	10857.6	10434.2	16757.4	7163.33	13791.2	12748.6	8583.21	8712.05	5899.82	7811.64
K00938	E2.7.4.2, mvaK2; phosphomevalonate kinase [EC:2.7.4.2]	40.5	34.99	65.99	82.49	50.7	207.33	235.37	173.49	162.16	91.79	71.45	127.24	56.83	28.87	37.92	90.26	85.49	184.08	84.67	34	67.54	24.33	17.83	24.83	27.27	34.2	12.5	60.17	74.33	47.1	67.7	66.84	112	53	114.99	113.67	54.99	24.16	27.82	39	70.5	27.4
K00939	adk, AK; adenylate kinase [EC:2.7.4.3]	20551.7	21562.1	21268.9	24442.2	21658.4	31825.6	29513	25292.2	21203.8	23303.2	18945.4	22782.2	16643	20368.7	22905.2	19399.6	22106	24227.5	23999.5	15603.9	23806.1	18602.4	17332.8	24828.6	21891.3	21912.7	1205.63	11602.8	14038.6	10527.8	18430.9	14793.9	18410.8	19128.3	21927.5	11229.6	26223.8	24318.8	15571.8	22468.4	12009.4	22547.5
K00940	ndk, NME; nucleoside-diphosphate kinase [EC:2.7.4.6]	18316.6	19230.5	18813.3	21899	17072.4	27607.3	25602.5	21898.8	18349.1	20799.3	17187.2	20183.1	15089.9	18415.4	20949.5	17020.1	19967	21237.9	22009.1	14369.3	22158.2	16315.8	14975	22630	20412.4	19779.7	1074.18	10444.8	12775	9568.01	17267.9	13549.2	17299.2	17393.1	20931.1	10437.3	23362.1	21758.7	13765.7	20277	10578	21196.2
K00941	thiD; hydroxymethylpyrimidine/phosphomethylpyrimidine kinase [EC:2.7.1.49 2.7.4.7]	17212.9	18112.3	17737.1	21479.2	17477.7	26458.6	25715.5	22071.9	18503.9	18033.2	14086.6	17984.2	13512.7	16887.4	18912.9	14631.2	15913.8	18721.3	18703.2	12593.8	19316.8	14693.9	14645.4	21346.9	18480.9	18015.5	1077.8	9381.98	12190.6	9080.16	15906.2	12946.1	16195.7	16178.7	19551.7	9724.58	21817.2	20121	12362.2	18510.5	9256.91	18851.7
K00942	E2.7.4.8, gmk; guanylate kinase [EC:2.7.4.8]	14918	16501.7	15720.8	19918.4	15987.9	23381.5	21553.4	18378.3	15466.7	16846.9	13661.7	16297.7	11237.6	14579.8	16427.8	13195.2	15794.8	16146	16489.1	10124.3	16324.3	13804.1	11736.3	19944.3	15786.6	15392.1	773.98	8270.66	10643.8	6750.76	13895.1	11281.4	13808.6	12192.1	15714.2	6521.59	18196.8	17010.5	10446.5	13989.6	8100.08	16406.2
K00943	tmk, DTYMK; dTMP kinase [EC:2.7.4.9]	18490.7	19504.6	19301.2	22433.2	18037.4	28461.6	26904.8	23071.1	19429.8	20214.2	15800.2	19777.3	14839.6	18539.8	20845.2	16206.5	17876.7	20346.4	21269.4	14435.4	21823.3	17101.5	15852.6	23141.6	20151.9	19279.5	1135.3	10079.8	12850.1	9752.26	17203.4	13750.7	17329.5	17301.8	20684.1	10458.1	23973.4	21609.5	13442.5	20690.3	10485.4	21069.3
K00945	cmk; CMP/dCMP kinase [EC:2.7.4.25]	20377.2	20648.6	21115.8	23698.9	18631	29907.8	28414.2	24448.6	20543.9	22718.5	18332.1	21504.2	15762.9	19437	21858.7	18642	21351.5	22521	22939.2	14974.6	22932.6	17842	17017.6	23781.7	20890.2	19867.6	1195.13	10859.3	13312.1	10369.3	17983.6	14416.4	18128.2	18370.4	21762.6	11857.6	24850.8	22751.8	14657.8	21602.4	11075.9	21771.4
K00946	thiL; thiamine-monophosphate kinase [EC:2.7.4.16]	16119	17236.8	16474.1	19829.4	14944.7	25290	23408.3	19969	16926.4	18744.8	15572.9	18306.1	13462.7	16411.8	18799.5	15270.7	18158.3	19444	19103.2	13033.1	20096.7	14269.6	13447	20731.2	18733.6	18271.5	1035.68	9609.32	11339.5	9227.41	14550.2	12413.5	15760.7	16269.8	18389.5	9477.83	20583.4	20162.3	12540.1	18822.2	9732.7	20049.7
K00947	mosAB; molybdenum storage protein	43.5	54.83	37.83	16	14	108	17.5	19	13	39.17	43.5	39.83	33.5	48.17	22.67	27.5	60.5	33	79	53.67	64.17	7.5	39.5	23.5	12	14	1	34	46	39.5	59.5	3.5	36.67	46	17.5	40.5	13.5	21	17.5	151.5	37.83	154.83
K00948	PRPS, prsA; ribose-phosphate pyrophosphokinase [EC:2.7.6.1]	19748.2	21385.2	20610.2	26666.5	21244.8	34222.1	30914.9	26444.8	22389.5	23347.7	19479.8	22562.6	16866.1	21003.9	23640.8	19167.6	22601.7	23766.6	24077.4	15880.1	24425.6	18578.2	17010.6	27285.3	22479.9	22222.5	1212	11720	14001	10799.9	20237.1	16308.5	19362.6	19076.9	21933.1	11149.8	25953	24611.5	15154.5	22112.1	11782.6	22650.2
K00949	thiN, TPK1, THI80; thiamine pyrophosphokinase [EC:2.7.6.2]	3429.41	3981.64	3834.53	5816.96	4753.66	7425.95	6113.21	5211.52	4332.08	4382.04	3137.45	3881.43	3012.14	3565.92	4176.63	3866.33	3499.82	4061.91	4265.31	2741.22	4321.18	3359.55	3136.66	4421.71	2549.27	3115.08	184.12	2059	2259.12	1695.05	2489.2	2015.28	2344	3073.18	2375.11	1607.75	5346.87	4028.52	2471.14	3489.21	1713.09	2788.58
K00950	folK; 2-amino-4-hydroxy-6-hydroxymethyldihydropteridine diphosphokinase [EC:2.7.6.3]	15856	17891.4	16200.1	19432.2	17566.6	24122.2	21165.7	17959.2	15209.7	16879.2	13389.6	16632	11697.1	15397.1	17098.3	12619.2	15241.3	15993	17652.1	10852.7	16742.2	15356.2	12450	23250.5	17016.9	16392.6	855.72	8976.82	13724	7092.34	14665.4	13525.6	16778.8	11977.9	23137.6	6927.51	19074.2	17865.9	11771.5	14562.8	8804.36	16883.4
K00951	relA; GTP pyrophosphokinase [EC:2.7.6.5]	16647.9	18903.6	17426	20995.6	19078.1	27540.5	22864	19452	16482.8	19311.9	15034.2	18853.9	12610.9	16567.2	18467.2	14378.2	17424.3	18182.5	18653	11246.5	17718.1	17044	13855.3	24891.6	17449.3	16812.2	893.18	9511.99	14155.5	7529.26	14849	13773.6	17179.7	13366	23723.8	7463.09	21002.2	18830.4	12456.6	14957.6	8839.91	17261.7
K00952	nadM; nicotinamide-nucleotide adenylyltransferase [EC:2.7.7.1]	4001.66	3492.24	4063.64	3325.5	2427.93	6284.5	6339.67	5531.41	4634.59	5316.83	4288.16	5029.25	4409.75	4655.49	5328.41	4974.07	5065.88	6312.75	6051.66	4729.75	6458.68	3700.83	4378.82	3761.58	5475.76	5374.41	382.32	2550.16	2588.83	3404.5	3801.33	2629.83	3939.08	6218.4	5522.41	4166.99	6554.4	5744.64	3780.09	7467.32	3011.83	5364.59
K00954	E2.7.7.3A, coaD, kdtB; pantetheine-phosphate adenylyltransferase [EC:2.7.7.3]	14925.8	16483.8	15754.8	19916.9	15969.9	23462.7	21529.1	18385.5	15465.9	16637.5	13455.2	16223	11226.5	14609.8	16424.8	12975.5	15503	16043.4	16494.3	10127.8	16323.2	13812.6	11828.8	19864.1	15357.1	14892.1	775.48	8225.66	10660.3	6757.26	13926.6	11325.9	13803.6	12027.1	15748.6	6621.09	18345	16912.2	10434.9	14006.9	8136.58	16535.7
K00955	cysNC; bifunctional enzyme CysN/CysC [EC:2.7.7.4 2.7.1.25]	2108.49	2466.68	1986.19	4117.99	2841.66	5574.83	3395	2912.49	2609.58	2924.01	2650.55	2724.86	1915.94	2618.5	2991.49	2339.17	3040.99	2820.41	2667.08	1758.59	2736.84	2912.26	1836.3	4934.84	3936.16	4909.66	131.36	1713.5	1401.33	1455.33	2823.17	2596.34	3040.5	1509.5	1370.57	1580.17	2635.63	3144.44	1447.77	2600.16	1272.66	2533.83
K00956	cysN; sulfate adenylyltransferase subunit 1 [EC:2.7.7.4]	1093.01	1315.08	1083.65	1570.84	969.12	3660.42	1958.41	1576	1357.36	1964.98	2315.83	1767.78	1437.36	1172.41	1412.87	1931	3011.38	2298.38	2406.45	988.59	1687.56	745.75	840.02	915.3	660.3	928.45	60.83	1196.99	757.34	827.21	940.41	372.92	713.59	1540.09	837.13	483.67	1642.31	1826.35	1251.17	1110.9	978.16	1207.79
K00957	cysD; sulfate adenylyltransferase subunit 2 [EC:2.7.7.4]	3431	4361.26	3209.34	5811.33	3941.78	8652.92	5669.41	4781.99	4245.44	5432.49	5342.88	4849.81	3630.64	4138.08	4925.36	4667.34	6490.87	5457.46	5387.53	3198.01	5118.07	3629.51	2736.82	6387.14	4116.46	5124.95	210.19	2938.99	2278.17	2537.21	4321.08	3438.26	4062.42	3863.59	2411.12	2425.34	4698.27	5153.79	2969.61	4112.4	2203.49	4081.62
K00958	sat, met3; sulfate adenylyltransferase [EC:2.7.7.4]	4492.69	4931.76	4469.1	4708.49	6350.66	5038.16	4626.17	3940.87	3180	4739.6	3835.49	5327.24	3075.46	5978.41	6324.51	3452.41	4341.48	5050.41	5097.75	2842.14	5310.07	3957.17	3816.49	6286	4279.83	4787.84	211	2959.17	4481.33	1565.7	3256.5	3313.22	2467.67	3218.33	9566.66	1763.17	7673.18	5576.61	4340.3	4378.66	2496.92	3006.66
K00960	E2.7.7.6; DNA-directed RNA polymerase [EC:2.7.7.6]	577	500.5	465	134.5	157.5	122	56	50.11	31.5	232	278.5	265.5	193.72	58	105.33	245.5	345	265	277.61	67	93	90.5	153	125.5	80.5	203.5	9	36	35	8	44.5	47	108.5	207.94	71.11	30	566	212	249.5	115	248	28.56
K00962	pnp, PNPT1; polyribonucleotide nucleotidyltransferase [EC:2.7.7.8]	14935.5	16494.3	15744.8	19923.4	15972.4	23467.5	21554.9	18405.8	15482.4	16644	13477.9	16230.7	11253.3	14630.3	16441.8	12974.5	15532.3	16052.6	16543.3	10183.8	16385.9	13789.1	11745.3	19862.8	15372.1	14907.1	777.48	8257.16	10656.8	6776.26	13932.6	11325.9	13820.6	12049.1	15755.2	6634.09	18185.2	16885.5	10432.9	14025.1	8140.58	16539.7
K00963	UGP2, galU, galF; UTP--glucose-1-phosphate uridylyltransferase [EC:2.7.7.9]	11976.2	12804.5	12431.2	15677	13335.7	18712.1	17188.7	14768.8	12330.8	11517.8	9337.75	11252.6	8317.94	10087.4	11714	8650.76	10457.8	10382.2	11807.4	7037.64	12232.5	10231.8	8468.75	15955.2	12181.9	11101.8	661.98	6539.66	8791.96	5109.17	8882.11	9578.04	11051.8	8944.93	12671.5	5016.09	14760.4	12279	8194.19	9592.18	5305.46	11829.7
K00965	galT, GALT; UDPglucose--hexose-1-phosphate uridylyltransferase [EC:2.7.7.12]	4569.81	5390.56	4795.6	6764.33	4524.95	8373.33	7283.37	6350.48	5442.31	6154.1	4955.78	5995.39	4080.25	4953.77	5699.21	4855.69	6026.61	6656.08	5199.66	3347.16	6002.23	5317.33	4298.85	5951.63	6122.55	4579.75	252.33	2097.83	2935.67	2245.01	3509.03	3181.29	3623.83	4398.2	2699.46	2847	6125.02	5918.84	3019.78	5691.32	2337.71	8779.32
K00966	GMPP; mannose-1-phosphate guanylyltransferase [EC:2.7.7.13]	2585.83	2386.61	2623.83	3383.66	1120.66	3103.75	2433.34	2195.54	1869.58	2014.34	1526.66	2405.67	2272.74	2513.67	2836.67	1520.5	1738.32	2879.58	2952.42	1975.08	3248.01	2210.5	1824	1717.5	3491.66	2352.67	139	901.17	1343.33	1195	2044.5	1850	2275.66	3115.83	1354.32	1455.67	2856.9	2721.99	1387.66	3714.33	1321.5	7510.83
K00968	PCYT1; choline-phosphate cytidylyltransferase [EC:2.7.7.15]	12.5	3	16.5	0	0.5	2	3.5	5.5	0	15.75	8	7.74	12.62	10	26.33	14.62	10.25	8.37	14.62	3.5	47.88	8	3	1.5	0	2.5	0	3.5	12	9	0.5	1	4.5	1	0.5	14.5	3.37	2.5	9.5	7.67	0	1.38
K00969	nadD; nicotinate-nucleotide adenylyltransferase [EC:2.7.7.18]	14915	16488	15724.3	19763.9	15962.4	22627.5	21573.9	18408.8	15475.9	16652.7	13501.4	16246.6	11265.1	14565.8	16438.2	12992.5	15573.3	16080.6	16551	10107.8	16384.6	13741.1	11739	19857.8	15389.6	14925.1	786.48	8262.16	10704.8	6797.76	13927.6	11343.9	13891.6	12039.4	15767.2	6643.59	18170	16903.5	10444.4	14013.1	8133.58	16409
K00970	pcnB; poly(A) polymerase [EC:2.7.7.19]	13656	14862.5	14158.5	17265.6	14742.3	19869.2	18598	15998	13438.7	14196.7	10642.7	13736.8	9474.72	13023.1	14358.7	10184.4	11924.2	12328	13858.5	8026.42	13462.1	13031.5	10868	18484.8	13760.8	12948.8	677.86	6690.33	9543.5	5755.91	12582.4	10549.4	12628.2	9203.92	13931.8	5627.01	15778.2	14143.7	8803.46	12170.7	6384.49	14267.5
K00971	manC, cpsB; mannose-1-phosphate guanylyltransferase [EC:2.7.7.13]	11543.6	12040.5	12491.1	10592.2	9563.84	14695.2	15558.1	13433.4	10987.4	15386.4	13081.1	14720	9326.75	11423	13334.7	12912.1	15692.7	15477.1	14558.1	9900.18	15297.9	10707.8	10278.7	12827.5	12131.2	12953.1	724.38	6975.32	6873.67	6589.7	11666	6934.34	9791.66	9618.32	8267.95	6272.83	18010.1	16163.1	9606.6	12808.2	7342.65	11602
K00972	UAP1; UDP-N-acetylglucosamine/UDP-N-acetylgalactosamine diphosphorylase [EC:2.7.7.23 2.7.7.83]	717.83	545.66	846.5	793.66	820.5	446.83	465.83	366.33	307	733.01	621.49	775	396.17	1667.5	1510.67	551.83	663.33	524.33	763	571.5	823.01	988.16	606.17	504.17	1218.66	1076.84	32.83	440.5	317	295.5	656.5	636.17	537.67	343.5	278.83	268.5	726.99	610.33	594.33	953.5	407.83	638.5
K00973	E2.7.7.24, rfbA, rffH; glucose-1-phosphate thymidylyltransferase [EC:2.7.7.24]	29902.1	30218.6	30770.7	33445.2	26093.3	47065.5	43398.6	37207.4	31293.8	36024.3	29537.5	34506.5	27769.2	31784	36435.6	30843.2	34500.7	37802	39609.1	27846.9	40591.3	27892.4	27731.2	36462.3	36566.6	35406	2070.79	17130.5	18867.7	18574	28556.6	20792.7	27776.4	35072.9	37303.3	22829.8	41440.3	37052.6	24194.2	39159.3	20081.8	34506.2
K00974	cca; tRNA nucleotidyltransferase (CCA-adding enzyme) [EC:2.7.7.72 3.1.3.- 3.1.4.-]	12652.8	14093.6	13594.6	17478.9	15348.6	19203.5	17875.5	15166.5	12790.3	13634.4	10216.8	14160.9	9462.11	11929.5	13866.3	10107.3	11563.9	14057.3	14115.2	8040.65	14157.4	11555.6	10717.3	17296	11914.6	10067.3	637.15	5633.66	8537.29	5226.63	12121.6	9459.03	11299.9	10928.3	13845.1	5008.09	16571.5	14695.6	9335.33	11245.8	5971.41	14327.7
K00975	glgC; glucose-1-phosphate adenylyltransferase [EC:2.7.7.27]	10172.1	11091.3	11275.1	10821.6	9037.6	14690.5	15991.1	13543.5	11411.4	11257	8717.55	10896.9	7191.89	9011.56	9987.22	8951.32	9815.93	10853	10816	7381.43	10878.3	11315.6	9789.59	13940.5	10652.8	10208.7	493.4	4949	7417.07	4312.18	8255.23	6096.9	9486.32	7438.03	13155.2	4571.67	12953.5	12277.1	7245.12	10738.6	5896.68	9781.63
K00978	rfbF; glucose-1-phosphate cytidylyltransferase [EC:2.7.7.33]	816.2	949.27	834.86	992.82	736.99	2285.33	1163	935.99	825.45	483.02	756.32	577.5	416.83	315.84	398.67	524.67	826.15	690.16	511	415.34	440.02	504.49	553.01	618.72	458	699.67	40.66	704.83	449	402.3	251.33	94.61	600.5	465.16	217.49	263.84	869.38	1260.52	697.3	754.67	588.54	503.66
K00979	kdsB; 3-deoxy-manno-octulosonate cytidylyltransferase (CMP-KDO synthetase) [EC:2.7.7.38]	11098.2	12217.3	11580	13643.2	13194.9	16764.2	16480.8	14157.1	11730.1	11799.7	9912.88	11377.4	7202.3	9889.41	11021.6	8878.33	11516.1	10463	11585.6	6969.76	10677.5	9857.78	8704.86	15627.3	10360	10641.2	572.06	6433.49	8220.34	4793.71	8535.91	8173.09	9765.42	6708.45	11959.1	3416.67	12712	11720.8	7939.72	9673.56	6188.32	8801
K00980	tagD; glycerol-3-phosphate cytidylyltransferase [EC:2.7.7.39]	62.81	99.07	53.04	18.5	35.29	44.33	105.26	81.07	63.12	132.99	141.92	113.98	79.12	80.57	109.13	103.59	197.27	129.17	142.62	115.67	188.15	53.67	71.25	49.17	93.5	92.5	12	163	103.17	95.2	136	268.28	155.5	66.36	39.8	53.5	79.14	84.18	94.34	362.07	6.88	201.38
K00981	E2.7.7.41, CDS1, CDS2, cdsA; phosphatidate cytidylyltransferase [EC:2.7.7.41]	15596	17040.9	16517.8	20581.4	16148.9	23948.6	22165.4	18939.8	15897.4	17207.2	14108.2	16752.7	11655.1	15381.2	17199.5	13524	16210.7	16528.7	16972.3	10505.3	16958	14626.2	12222	20327.3	16080.1	15611.6	799.18	8485.66	10849.8	6868.29	14340.1	11612.4	14081.6	12854.1	16460.8	7157.59	18899	17526.4	10998.4	14579	8356.08	16945.2
K00982	glnE; [glutamine synthetase] adenylyltransferase / [glutamine synthetase]-adenylyl-L-tyrosine phosphorylase [EC:2.7.7.42 2.7.7.89]	5374.67	7063.43	5328.67	6157.74	8815.95	9387.17	5714.41	4926.16	4183.61	6520.16	5508.47	6463.64	3807.23	5623.57	5806.71	4775.25	6225.86	6011.21	6001.95	3821.09	5102.91	6270.93	4477.82	10756.3	6493.29	7661.79	355.86	3847.66	5755.17	2788.21	5293.91	6429.76	7349.92	3494.92	10070	2790.84	6813.6	5659.37	4646.27	4641.4	2874.32	3904.62
K00983	neuA; N-acylneuraminate cytidylyltransferase [EC:2.7.7.43]	1838.91	1607.66	2028.25	726.59	943.5	2506.49	1382.91	1221.91	1047.74	2619.51	3156.58	2278.49	1130.09	609.85	1214.4	2374	4174.25	2587.66	1991.58	630.68	2356.33	1734	1015.49	1042	2368.67	2878.57	50.33	750.33	615.17	452.33	1251.17	506.34	847.84	883.67	600.83	379.5	3648.32	2727.67	1630.68	919.67	330.16	879.16
K00984	aadA; streptomycin 3"-adenylyltransferase [EC:2.7.7.47]	35.83	70.67	56.25	68.17	87.33	124.67	96.5	90.5	75.67	144.5	147.42	147.25	22.34	34.44	34.66	129.17	182.34	166.5	76.75	68.84	90.25	57	98.84	185	28.17	9.33	6.33	54.33	84	15.5	12.17	115	132	116	492.33	183	90.85	152.41	132.67	22.83	65	17.83
K00986	ltrA; RNA-directed DNA polymerase [EC:2.7.7.49]	245.09	147.33	263.7	290.55	60.31	348.96	413	393.26	271.65	443.19	261.12	432.74	106.76	127.22	124.21	269.01	258.57	333.86	232.12	273.76	149.19	656.53	417.79	317.28	2091.65	3111.73	17.25	244.33	136.62	82.58	105.67	130.48	128.48	281.88	25.5	90.75	1635.77	1139.85	509.14	473.71	435.21	326.76
K00988	APA1_2; ATP adenylyltransferase [EC:2.7.7.53]	38.17	37	57.67	45.5	10.83	69	104.5	97.5	66.5	46.67	55.67	54.5	9.75	14	16.5	47.83	43.33	50.5	16.75	15.25	10.67	86.5	56	40	184.83	325.17	0.5	59	21	15.5	22	8.83	16.66	7.83	0	4.5	192.08	296.33	37	30	61	17.33
K00989	rph; ribonuclease PH [EC:2.7.7.56]	12638.7	13975.2	12968.8	15996.9	13607.7	18216.3	18001.6	15490.4	12910.4	12368.2	9588.05	12386.5	8143.7	10845	11775.8	9226.79	10781.8	11840.4	11918.5	8239.47	11592.4	11071.6	9885.06	17111.7	11703.8	10509.2	649.48	6502.66	9468.29	5209.16	10879.9	9613.87	11586.6	8361.93	13946.4	5224.09	13170.8	12789.2	7953.08	11515.1	6772.75	13986.6
K00990	glnD; [protein-PII] uridylyltransferase [EC:2.7.7.59]	6464.51	8014.35	6465.83	7096.58	9891.45	10193.8	6658.08	5764.83	4840.61	7290.49	5981.48	7311.47	4504.56	7243.74	7789.88	5125.26	6598.53	6346.88	7307.95	4201.76	7006.57	7220.1	5231.48	11868.6	7607.55	8618.45	415.53	4258.66	6192.67	3110.71	6657.91	7712.09	8078.92	4002.42	10120.3	2906.84	8932.62	7071.21	5482.77	5361.73	3186.82	4462.95
K00991	ispD; 2-C-methyl-D-erythritol 4-phosphate cytidylyltransferase [EC:2.7.7.60]	11848.2	13206.2	12635.4	13513	10561.4	17434.5	16589.1	14106	11966.6	12093	9294.72	12147	7933.21	10589.6	11486.1	9014.4	10551.2	11759.4	11542.9	7956.31	10992.2	11240	9716.32	13822.4	11863	10715.8	617.48	5937.49	8611.96	5142.69	7953.91	8120.2	10392.8	8995.43	12500.4	5246.92	12492.9	12908.6	7923.01	11185.8	6414.96	13902.3
K00992	murU; N-acetyl-alpha-D-muramate 1-phosphate uridylyltransferase [EC:2.7.7.99]	3962.25	4829.94	3783.2	7265.75	7982.83	9135.92	7863.41	6607.5	5707.08	4920.67	4001.15	4827.18	3123.73	4717.5	5025.74	3621.2	4521.32	4453.03	4767.03	2956.26	4100.38	4795.77	3365.72	9438.59	5127.51	6080.07	235.03	3264.66	5259.67	1922.3	3774.58	5059.58	5577.08	3071.25	9810.17	1868.67	5666.43	4584.95	3524.11	3657.66	2372.66	2674.04
K00995	pgsA, PGS1; CDP-diacylglycerol---glycerol-3-phosphate 3-phosphatidyltransferase [EC:2.7.8.5]	19263.2	20345.2	20017.2	24082.2	17868.2	28835.8	24891	21325.8	18141.2	19619.2	15560.1	19139.8	14532.9	18351	20463.9	15573.8	17558.8	19586.5	20223.6	13866.5	20748.2	16410.2	14960.5	22933.8	17594.7	16270	973.67	9926.33	12214.3	8493.09	17460.6	13861.5	17449.8	17340.5	18607.2	9605.09	22873.4	21408.8	13273.1	18994.7	9638.75	24789.3
K00996	rfbP; undecaprenyl-phosphate galactose phosphotransferase [EC:2.7.8.6]	2.43	8.16	5.31	7.67	9.79	33.17	59.5	46.67	37.08	21.98	33.5	16.79	26	20.33	21	18.29	36.81	24.42	47.5	33.83	27.17	36	11.43	38.5	558.79	805.38	4	36.83	8	30.88	26.83	11.67	31.67	22.67	12.17	31	13.13	24.42	16.08	17.17	16.83	22.33
K00997	acpS; holo-[acyl-carrier protein] synthase [EC:2.7.8.7]	11669.4	12122.1	12460.2	12606	9342.4	14590	14286.3	12349	10160.8	10634.3	7886.06	10592.1	7960.9	9769.65	11197.8	7871.38	8692.45	10032.3	11344.5	6892.97	11817.9	10921.8	8862.68	12092.4	11705.8	10883.9	615.78	5919.49	8896.29	4824.97	9959.45	8231.37	10881.9	8334.43	13767.3	4818.75	13721.2	11659.5	6698.51	10737.8	5667.92	13348.3
K00998	pssA; CDP-diacylglycerol---serine O-phosphatidyltransferase [EC:2.7.8.8]	4.43	4.84	3.31	4.67	4.79	32.17	96.33	77.67	76.45	8.23	9.17	7.53	12.79	1.9	8.8	8.34	16.3	5.97	31.87	7.83	16.73	4	3.93	6.05	5.79	4.88	0	9.83	17.17	9.41	28.33	0.84	4.67	1.17	0.47	2	8.65	11.6	6.67	18.57	1.83	22.46
K00999	CDIPT; CDP-diacylglycerol--inositol 3-phosphatidyltransferase [EC:2.7.8.11]	2	3	3	4	0	6	8	6	8	2	5	9	8	12	8	3	6	6	3	9	7	12	2	2	19	6	0	7	3	0	5	0	18	10	12	0	8	13	4	46	0	13
K01000	mraY; phospho-N-acetylmuramoyl-pentapeptide-transferase [EC:2.7.8.13]	14743.2	16375	15519.8	19846.7	15936.4	23378.1	21461.5	18345.4	15434.4	16420.7	13246.9	16050.1	11058.6	14335	16147.8	12722.2	15262.9	15844.3	16271.8	9948.48	15928.6	13504.4	11537.6	19704.2	15198.5	14814.3	774.15	8155.16	10605.8	6791.26	13833.6	11218.2	13710.6	11747.1	15541.9	6521.09	17867.2	16570.1	10267.6	13661.1	7996.58	16280
K01001	ALG7; UDP-N-acetylglucosamine--dolichyl-phosphate N-acetylglucosaminephosphotransferase [EC:2.7.8.15]	151	103	143	63	86	137	679	593	539	257	211	195	75	111	90	209	268	220	175	186	212	188	213	113	163	313	60	198	220	519	371	321	258	45	153	63	505	348	273	377	64	263
K01002	mdoB; phosphoglycerol transferase [EC:2.7.8.20]	87.59	63.55	59.81	31.67	20.95	88.34	62.5	53.75	46.42	39.64	46.08	30.53	308.46	59.07	131.71	27.68	31.47	28.47	615.12	185.59	233.98	53.75	120.02	49.5	113.54	101.96	5.33	110.83	76.5	86.91	157.92	73.75	97.75	15.75	5.05	8.5	59.98	99.93	77.17	82.15	94	74.46
K01003	bcpA; oxaloacetate decarboxylase [EC:4.1.1.3]	4	7.27	7.53	2	4	1	0.33	1	0	2	1.73	3.53	6.53	1	11	0.33	7.33	0	12.66	17	7	37.6	4.8	19	568	835	3.2	31	9	3	0	0	0	0	1	1	3.73	2.2	3.53	2	3	47.33
K01004	pcs; phosphatidylcholine synthase [EC:2.7.8.24]	1921.16	2281.27	1778.2	4633	4591.83	5720.33	3635.16	3095.33	2602.84	1728	2018.23	1790.03	1297.54	2020.17	2106.66	1608.33	2247.67	1820.16	1399.66	899.34	1572.84	1243.27	1277.64	4702.5	1760.17	2678	90.53	1761.33	1460	738.5	1501.17	1775	1454.67	1270.5	1229	718	2117.47	2450.2	1513.7	906.16	797	827.66
K01006	ppdK; pyruvate, orthophosphate dikinase [EC:2.7.9.1]	11913.1	12002.4	12812.6	13564.5	9842.62	15390	14492.4	12579.1	10456.8	11051	8747.73	10891.9	8052.08	11763.1	12742.7	8549.67	9706.98	10147.2	11249.2	7128.72	11528.3	9247.54	8423.16	10997.7	12469.5	12059.5	566.95	5461.67	5947.45	4608.25	9790	6990.34	9022	8590.74	6384.49	5012.92	10996.8	11032.5	6757.54	11169.7	5437.54	13762
K01007	pps, ppsA; pyruvate, water dikinase [EC:2.7.9.2]	12189.1	13587	12401.5	12859.1	13565.9	17909.2	14679.4	12669.5	10673.3	15097.8	12053.5	15672.2	10619.9	14697	16979.3	12007.8	13455.6	16421.9	16515.8	10743.1	18238.6	11957.4	11096.5	16781.2	14354.3	14391	864.47	7413	9308.61	7785.66	13786.2	11482.1	12476.2	13052.4	17201.8	7975.42	20856.8	17266.8	11532.8	14518.6	6982.62	11719.1
K01008	selD, SEPHS; selenide, water dikinase [EC:2.7.9.3]	7122	7693.4	7705.01	9708.62	6887.91	11570.3	8334.84	7401.15	6169.17	8052	5850.21	8497.94	6462.95	8499.01	9661.08	6184.29	6436.54	8549.76	8927.27	4709.15	9177.18	7147.22	5782.9	8598.22	8580.97	9031.83	358.3	3225.65	3752.62	2964.69	6180.24	5160.92	6029.92	6379.81	3512.7	3600.25	9886.67	8084.11	4867.34	6494.85	3464.2	9969.02
K01011	TST, MPST, sseA; thiosulfate/3-mercaptopyruvate sulfurtransferase [EC:2.8.1.1 2.8.1.2]	18042.6	18808.4	18265.6	18031.4	15457	26134.3	22647	19358.5	16477	21813.5	17819.8	21294.2	16370.7	19437.1	20760.5	19377.3	20753.9	25037.9	22508	16254.8	21164.4	17617.4	17595.8	22551.9	22799.6	26213	1321.98	12250.1	15762.1	11053.7	15519.2	13083.8	18324.8	21410.6	39776.2	14596.6	27910.1	23671.8	16238.8	20696.7	10749.4	18124.6
K01012	bioB; biotin synthase [EC:2.8.1.6]	12092	13264.1	13112.2	14859.4	12661.1	18319	19225.4	16437.9	13847.7	14431.2	11721	13918.3	9070.06	11037.3	12978.1	10904.8	13628.3	13749.1	14560	9057.61	13666	11798.4	10887.4	16312.3	12045.8	11863.9	728.42	6676.82	8940.74	6326.11	11886.2	10181.5	11940.8	11201.2	16557	6226.33	17195.9	15366.6	9871.54	13397	7057.12	11283.4
K01014	SULT1A; aryl sulfotransferase [EC:2.8.2.1]	19	60	16	3	4	1	4	6	3	64	91	45	35	27	25	53	133	72	70	79	74	8	5	1	11	29	0	7	0	0	0	0	2	12	12	0	72	59	62	18	2	24
K01015	SULT2B1; alcohol sulfotransferase [EC:2.8.2.2]	0	0	0	0	0	0	0	0	0	0	0	1	109	32	54	0	0	0	0	0	2	0	0	0	0	0	0	0	0	0	0	15	42	0	172	1	0	0	0	4	0	6
K01023	assT; arylsulfate sulfotransferase [EC:2.8.2.22]	0	3	2	5	0	9	9	6	6	10	18	8	11	18	0	0	16	9	13	0	3	2.5	5	21	2	2	0	13	3	0	6	0	3	22	5	26	8.5	6	6	0	0	0
K01026	pct; propionate CoA-transferase [EC:2.8.3.1]	98.64	155.98	92.48	89.38	22.96	198.95	67.6	66.5	60.34	58.83	56.96	52.54	30.12	91.05	27.21	40.83	68.49	51.83	34.12	125.25	59.67	46.96	38.35	33.38	576.5	826.38	6.45	79	49.12	37.05	40.67	14	64	41.24	13	26.75	90.75	68.74	74.12	24.71	37.38	132.62
K01027	OXCT; 3-oxoacid CoA-transferase [EC:2.8.3.5]	101.66	66.99	202.99	108.66	54.33	99.5	168.84	172.66	143.83	239.67	304.66	200.5	101.99	35.17	87.67	219.67	379.49	293	160	95	79.67	180.33	84.16	56	97.5	116.5	8	405.67	311.33	51	225.5	78.67	120	50	39.66	27.67	234.82	342.66	217.49	48.5	76	28.67
K01028	E2.8.3.5A, scoA; 3-oxoacid CoA-transferase subunit A [EC:2.8.3.5]	1962.63	2002.46	1910.25	2585.75	2279.28	3408.08	3035	2675.85	2088.49	2455.58	2857.98	2274.43	1410.69	1700.35	1983.32	2388.37	3520.41	2669.2	1983.97	1049.43	1822.63	1046.35	1162.48	1644.92	1670.79	2734.21	102.53	1896.33	1425.67	1136.85	1300.92	1131.7	1507.92	1771.86	1702.26	747.17	2782.08	2348.11	1760.87	1120.5	1311.71	1177.27
K01029	E2.8.3.5B, scoB; 3-oxoacid CoA-transferase subunit B [EC:2.8.3.5]	2077.63	2172.46	2005.25	2594.75	2316.28	3537.08	3068	2699.85	2120.49	2502.58	2908.98	2329.43	1449.69	1732.35	2005.32	2413.37	3573.41	2716.2	1993.97	1075.43	1822.63	1061.35	1196.48	1656.92	1727.79	2805.21	110.53	1997.33	1517.67	1190.85	1461.92	1163.7	1571.92	2012.86	1743.26	775.17	2867.08	2408.11	1830.87	1140.5	1311.71	1182.27
K01031	pcaI; 3-oxoadipate CoA-transferase, alpha subunit [EC:2.8.3.6]	295.52	387.4	258.15	47.5	100.62	197.24	56.25	55.75	49.5	248.83	191.7	293.26	62.24	94.5	96.01	227.33	182.74	258.75	48.01	77	138.25	160	199.94	59.26	253.63	398.88	8	174.49	158.51	114.38	148.5	356.5	126.01	156	500	201	596	392.08	217.12	91.75	23	82
K01032	pcaJ; 3-oxoadipate CoA-transferase, beta subunit [EC:2.8.3.6]	296.52	389.4	256.15	47.5	98.62	197.24	56.25	55.75	49.5	248.83	191.7	293.26	61.24	94.5	96.01	227.33	182.74	258.75	43.01	77	122.25	160	199.94	59.26	253.63	398.88	8	174.49	158.51	114.38	148.5	356.5	126.01	156	500	202	596	392.08	217.12	91.75	23	80
K01034	atoD; acetate CoA/acetoacetate CoA-transferase alpha subunit [EC:2.8.3.8 2.8.3.9]	496.88	592.95	591.42	219.88	78.29	748.12	250.93	216.45	190.17	300.89	174.46	286.33	243.12	138.38	152.38	283.04	164.14	319	331.37	287.25	215.5	282.13	339	167.88	784.5	920.38	22.12	194	105.12	73.25	106.5	80.11	316.33	277.74	185.5	117.75	298.46	307.74	339.71	234.38	123.76	74.62
K01035	atoA; acetate CoA/acetoacetate CoA-transferase beta subunit [EC:2.8.3.8 2.8.3.9]	460.38	564.95	557.42	218.88	69.29	726.12	246.93	208.45	188.17	272.89	137.96	263.33	229.12	130.88	131.38	264.54	132.64	293	326.87	265.25	187.5	252.13	299.5	152.38	765.5	903.88	22.12	173	105.12	63.25	96.5	78	294.33	264.74	167.5	110.75	185.46	280.74	289.21	213.88	122.38	71.62
K01039	gctA; glutaconate CoA-transferase, subunit A [EC:2.8.3.12]	2214.5	1782.8	2311.28	4211.17	1087.08	3711.5	1440.33	1319.88	1129.17	1815.59	1037.15	1655.61	2425.95	2459.01	2647	1432.25	1112.75	1755.75	3198.58	1228.18	2389.59	2080.35	1399.31	1142.42	3804.84	2948.33	86.53	574.66	915.67	702.5	1946.42	1704.25	1539.51	2356.5	973.41	1096.5	2191.82	1773.28	739.95	2319.75	781.16	5451.57
K01040	gctB; glutaconate CoA-transferase, subunit B [EC:2.8.3.12]	835	495.05	985.78	2004.17	487.33	2288	901.33	791.63	623.92	994.09	544.15	856.36	1340.2	989.51	1157.75	887	565.5	936	2482.58	980.93	1328.59	1098.85	728.81	629.67	1740.09	2033.58	51.53	366.16	340.17	491	1209.42	804.25	800.26	780.75	660.16	295.5	1341.9	814.78	388.2	1519.75	417.16	1192.32
K01042	selA; L-seryl-tRNA(Ser) seleniumtransferase [EC:2.9.1.1]	3821.26	4271.9	4171.97	5644.12	4305.54	6872.79	5423.68	4667.23	3934.87	5253.05	3627.2	4856.15	3388.95	5079	5725.51	4005.75	4024.98	4644.1	5523.69	3899.55	6001.93	5090.97	4143.23	5659.76	4460.33	4527.47	196.14	2486.16	2405.78	1958.07	4090.49	3170.84	3787.84	2682.56	2198.95	1835.91	6817.35	5946.62	3170.66	5065.27	2539.2	5050.45
K01045	PON; arylesterase / paraoxonase [EC:3.1.1.2 3.1.8.1]	0	1	0	0	0	0	0	0	0	0	0	0	2	0	18	0	0	0	3	2	15	0	0	0	0	0	0	0	0	0	0	0	0	0	0	0	2	0	0	308	0	103
K01046	lip, TGL2; triacylglycerol lipase [EC:3.1.1.3]	858.16	1289.55	886.88	1636.65	832.66	4621.66	2036.51	1589.65	1433.7	1222.09	1252.78	1088.48	947.37	1061.27	1302.5	1145.42	1429.32	1149.82	1125.92	1146.34	1815.09	860.03	950.84	1525.88	820	1031.83	70.9	716.84	573.66	570.5	944.5	636.56	948.5	1255.33	583.65	672.84	1780.3	2226.64	1027.46	1085.82	553.25	1185.5
K01048	pldB; lysophospholipase [EC:3.1.1.5]	1595.26	1440.42	1477.06	1942.33	2067.12	2581	2306.66	2028.11	1611.7	1215.39	1378.33	1325.19	1075.51	1561.07	1860.13	1188.84	1517.62	1400.88	1408.81	737	1649.9	829.84	740.26	1311.55	1577.79	2547.71	74.5	1457.5	1235.17	597.71	762.16	1029.11	1152.5	1236.44	1325.91	710.67	1782.06	1323.93	1029.75	1277.07	635.38	805.69
K01051	E3.1.1.11; pectinesterase [EC:3.1.1.11]	399.54	263.36	431.02	48.33	51.13	44	109.5	85.66	70.67	334.98	405.44	287.58	94.83	108.89	180.63	325	496.46	318.39	160.74	36.5	135.03	167.5	124.58	105.33	173.3	217.7	6.99	77.66	103.33	31.24	91.66	172.83	116.5	275.65	45.63	44.16	229.21	240.82	316.12	257.39	85	108.25
K01053	E3.1.1.17, gnl, RGN; gluconolactonase [EC:3.1.1.17]	2283.76	2491.05	2118.98	1718.82	1333.16	2729.47	1803.32	1457.23	1252.74	2280.44	2477.83	2002.93	1711.89	1661.84	1940.43	2438.56	3055.44	2574.56	3125.51	2161.34	2968.77	2538.74	1473.53	1793.2	6215.93	8774.92	100.99	1486.31	1022.52	1298.3	1614.42	1156.76	1519.1	960.92	1167.74	719.17	2652.6	2846.82	1723.26	2726.58	968	1799.16
K01055	pcaD; 3-oxoadipate enol-lactonase [EC:3.1.1.24]	2288.18	2347.11	2186.54	1884	2021.62	3744.58	2287.08	2016.86	1611	1535.33	1759.83	1774.15	1377.03	1770.5	1976.33	1395.66	1975.91	1782.25	1574.94	856.5	1658.25	1231.2	1071.7	1760.92	3082.29	4546.88	102.4	1256.33	1398.17	753.38	975.5	1369.5	1201.67	1250.44	1477.94	1540	2207.38	1734.98	1484.85	1079.42	738	1068.89
K01056	PTH1, pth, spoVC; peptidyl-tRNA hydrolase, PTH1 family [EC:3.1.1.29]	14953.3	16509.3	15766.5	19963.9	15977.4	23617.2	21645.4	18484.8	15559.1	16707.5	13524.9	16277.7	11293.3	14647.3	16462.8	13031.3	15598.8	16130.4	16589.3	10192.8	16439.9	13813.2	11776.5	19882.8	15381.5	14916.6	780.98	8272.66	10683.8	6796.26	13998.1	11373.4	13876.1	12095.1	15913.6	6741.09	18236.5	16918	10469.1	14042.1	8147.58	16567.2
K01057	PGLS, pgl, devB; 6-phosphogluconolactonase [EC:3.1.1.31]	5429.89	6354.7	5301.49	8399.33	8626.95	11680.5	6811.18	5806.4	5012.99	6119.51	5523.24	5870.31	4592.72	6712.84	6995.08	4847.11	6400.99	5964.95	5644.03	3486.92	5394.05	5696.35	4015.39	10187	6681.09	7787.41	295.53	3408.16	5578.67	2553.13	5262.25	5722.09	6547.58	5092.61	10366.2	2820.17	5774.58	5880.52	4051.95	4046.49	2723.49	7041.87
K01058	pldA; phospholipase A1/A2 [EC:3.1.1.32 3.1.1.4]	190.34	202.05	195.89	661.09	241.95	2262.67	712.24	591.83	493.16	821.31	1035.66	623.86	659.95	206.58	425.79	781.67	1443.55	817.29	1368.28	398.18	951.97	420.58	232.85	347.67	892.88	1430.37	13.33	223.33	122.84	197.08	272.58	164.42	236.58	425.92	312.8	78.67	402.97	454.93	352.84	381.31	306.83	493.96
K01060	cah; cephalosporin-C deacetylase [EC:3.1.1.41]	73.67	84.83	120.17	65.83	38.17	163.83	49.83	38.33	30.83	91	112.75	118.42	111.34	184	147.75	93	168.66	160.16	240.25	528.67	263.59	54.5	94	38.83	23.17	45.5	4	272	49.5	253.5	126	54.28	66	99.5	64	67.5	139.29	225	61.5	466.5	387.88	519
K01061	E3.1.1.45; carboxymethylenebutenolidase [EC:3.1.1.45]	3482.17	4169.36	3471.27	4108.13	2681.6	7346.49	4909.02	4044.71	3569.72	4127.14	3830.09	4103.49	3218.34	3360.16	4399.87	3265.87	4264.22	4389.85	5180.55	3333.67	5534.6	4667.83	3186.22	5053.85	5990.03	6981.96	239.53	3608.51	3424.16	2536.57	3139.25	4131.77	5829.57	3411.4	9714.64	1948.35	6596.46	6037.36	3192.3	4427.38	1977.5	3557.79
K01066	aes; acetyl esterase [EC:3.1.1.-]	4966.99	4742.83	5031.09	4133.83	2371.03	7655.75	5715.25	4987.66	4204.51	5250.28	4805.01	5043.44	4995.78	4885.08	5514.87	4512.92	5624.86	5581.34	7635.49	5774.18	6901.28	5139.27	5060.91	5683.67	8228.71	9079.96	416.69	3471.16	3399.5	3845.74	4967.51	3978.67	5387.59	6664.75	6785.87	5695.17	6575.07	5397.87	4172.35	6732.48	4381	4790.33
K01067	E3.1.2.1, ACH1; acetyl-CoA hydrolase [EC:3.1.2.1]	224.5	246.83	267.33	50	52	138	48.5	37	39.5	445.17	163	359.33	161	216.17	286.67	75	127	87.5	334	129.67	310.67	629.5	276	568.5	126	61.5	8.5	45.5	55	58	43.5	53.5	40.67	60	62.33	94	137.5	194.5	151	444.5	129.83	314.33
K01069	gloB, HAGH; hydroxyacylglutathione hydrolase [EC:3.1.2.6]	7467.15	9499.17	7765.54	11620.4	10788.2	15424.9	13089.3	10977.3	9457.81	9216.58	8006.82	9316.21	6256.82	9102.01	10164.5	7476.42	9034.52	9691.21	9173.26	6885.85	9674.29	7657.43	6818.06	13063	8047.3	8960.12	503.53	5385.16	7046.17	4218.21	7033.41	7359.09	9174.58	7018.55	14009.2	4874.34	9993.53	9944.29	6648.6	8315.23	4468.2	6847.89
K01070	frmB, ESD, fghA; S-formylglutathione hydrolase [EC:3.1.2.12]	2128.68	2208.71	2050.21	3135.25	2286.28	5362.92	3508.24	3055	2511.2	1579.98	1817.22	2225.67	2012.93	2014.97	2674.84	1472.02	1995.8	2696.56	3149.28	1632.26	2869.53	1307.37	1278.78	1686.14	2449.46	4117.12	87.73	1299.16	1248.84	819.11	1124.08	1227.58	1391.74	1840.75	1538.1	1026.17	2261.42	1896.18	1298.48	2087.46	1453.66	1375.12
K01071	MCH; medium-chain acyl-[acyl-carrier-protein] hydrolase [EC:3.1.2.21]	157.67	234	170.08	57.33	47.87	231.83	138.53	101.33	110.33	150.37	152.29	134.32	54.67	34.2	58.25	137.67	171.83	169.33	63.25	62	67.62	89	72	71.33	99.27	49.2	3	47	67	13.6	74.2	53.67	117.83	33.33	77	43	165.17	116.08	128.83	26	94.5	21.9
K01073	E3.1.2.20; acyl-CoA hydrolase [EC:3.1.2.20]	2	2.1	2.2	0	13	0	0	0	0	4	3.4	22.2	0.2	0	0	6	8	33	2	1	5	1.6	7.8	3	0	2	0.2	0	0	0	0	0	11	0	4	0	3.4	6.2	5.2	3	0	4
K01075	E3.1.2.23; 4-hydroxybenzoyl-CoA thioesterase [EC:3.1.2.23]	1104.66	1006.52	993.02	1119.5	510.99	1452.01	1643.17	1453.66	1132.42	832.34	840.4	795.2	959.45	715.01	862.82	802.68	992.67	835.25	1720.41	1039.43	1345.67	563.43	591.31	682.5	1074.51	1475.16	58.36	470.33	509.83	466.5	504.34	277.67	538.33	413.5	1314.83	906.17	1335.13	944.94	706.78	695.16	679.33	577.99
K01077	E3.1.3.1, phoA, phoB; alkaline phosphatase [EC:3.1.3.1]	2857.26	3365.14	3224	4409.99	3355.79	6425.33	5614.15	4737.61	4166.15	4709.15	3778.97	4403.86	3376.93	4720.56	5643.13	3692.48	4403.61	4183.94	4596.13	2644	5531.92	4091.6	3279.73	3921.51	3853.46	3991.87	160.53	1607.33	1580.34	1509.24	3230.15	2134.56	2450.33	3039.44	2098.33	1587.84	6298.62	5265.13	2868.97	3600.23	2315.13	3018.7
K01078	PHO; acid phosphatase [EC:3.1.3.2]	484.25	952.5	457	1007.5	786	2409.25	1512.75	1217.75	1133	972	1084.25	859.25	659.25	636	962.5	947	1207.75	982.75	955.5	807.5	1524.25	440	580.5	1441.75	475	498.5	48	509	374.5	557	786	688	748	899.5	410.25	543.5	1269.75	1504.75	723	877.25	280	958
K01079	serB, PSPH; phosphoserine phosphatase [EC:3.1.3.3]	8583.24	8901.88	8345.33	6931.62	6987.01	12978.3	10813.3	9351.86	7897.33	9177.69	8094.67	9063.46	7422.01	8220.8	9222.41	8136.4	9557.46	10348.9	10841.4	7629.01	10590.5	7161.23	7974.04	8679.68	9173.34	10436.4	560.96	4891.31	6323.62	4989.06	6979.1	5179.92	6697.75	8894.1	7677.03	6305.74	10499.9	10627.6	7162.78	11627.1	5688.53	9329.81
K01081	E3.1.3.5; 5'-nucleotidase [EC:3.1.3.5]	2441.9	2699.29	2292.28	3214.32	3564.49	6575.54	3884.01	3344.68	2747.12	5140.17	5116.16	4414.66	2175.08	3045.08	3316.85	4283.68	6790.14	4818.33	3239.51	1659.11	2815.08	2733.45	1661.89	3660.16	3393.26	3703.29	119.45	2034.5	2026.45	1344.77	2301.83	3191.67	3852.5	2510.9	1906.38	1830.26	3195.27	2590.23	2247.07	1888.3	1619.04	1944.29
K01082	cysQ, MET22, BPNT1; 3'(2'), 5'-bisphosphate nucleotidase [EC:3.1.3.7]	5735.42	6995.85	5624.67	10444.3	8245.78	13101.9	11074.7	9314.24	8074.02	7405.58	6300.47	7475.13	5074.68	7601.74	8207.37	5725.95	7148.36	7535.83	7417.48	4900.17	6969.87	6999.01	4395.48	11550.7	8241.2	9538.29	347.86	5049.83	6354.5	3555.21	6631.91	6755.09	7434.41	5621.42	11298.1	3101.34	7928.21	7335.87	4576.77	5734.98	3558.49	4782
K01083	E3.1.3.8; 3-phytase [EC:3.1.3.8]	150.59	106.75	205.58	243	129.33	263.5	488.75	434.75	351.75	286.59	361.17	298.24	249.87	289.5	473.58	260.87	437.83	382.62	443.7	257	491.55	196.75	104.5	142.5	182	259.75	17.5	421.5	272	231.33	381	263.44	393.16	331.16	86.25	86	289.11	548.5	207.92	234.5	190.71	224.71
K01085	agp; glucose-1-phosphatase [EC:3.1.3.10]	5.26	2.22	19.14	0	0.12	2.67	0	0	1	3.14	4.5	3.79	0.17	1.4	30.8	5.72	8.21	3.1	4	0	8.1	0	1.6	4	5.62	29.38	0	7	4	3.91	10	0.5	3	9.5	21.3	8	5.36	9.43	1.33	37.9	0.5	3
K01086	fbp-SEBP; fructose-1,6-bisphosphatase I / sedoheptulose-1,7-bisphosphatase [EC:3.1.3.11 3.1.3.37]	0	0	0	1	0	2	0	0	0	1	1	0.5	1	1	0	0	0	0	2	4	13.5	0	0.5	0	5	14	2	4	0	0	4	0	0	0	6.5	0	0.5	0	0.5	0	0	7
K01087	otsB; trehalose 6-phosphate phosphatase [EC:3.1.3.12]	2625.17	2544.71	2565.15	5112.5	1483.04	5627	4532.75	4000.17	3555.75	3132.64	2577.42	3041.12	3281.16	4014.07	4262.04	2578.46	2861.35	3351.93	3787.08	2084.08	3447.77	2545.17	2040.93	2732.84	4630.37	4126.46	133.83	1706.83	1770.67	1254.71	2417.17	2441	2669.08	3957.25	3295.3	3036.5	3219.52	3514.6	1510.33	3650.49	1741	6287
K01089	hisB; imidazoleglycerol-phosphate dehydratase / histidinol-phosphatase [EC:4.2.1.19 3.1.3.15]	734.18	1084	716.06	3068.34	2488.79	2578	1867.08	1612.25	1338.61	2258.56	2487.83	1944.53	1163.03	1401.91	1646.38	2235.59	3317.72	2502.97	1720.45	684.5	1399.06	715.08	529.09	3334.88	946.29	1049.46	44.5	874.33	585.67	621.91	1434.83	1195.84	916.34	1261.84	671.55	425.5	1175.81	1332.02	1035.17	622.07	886.83	960.46
K01090	E3.1.3.16; protein phosphatase [EC:3.1.3.16]	10955.2	11348.7	11813.1	9565.54	8811.29	11735.8	11322.3	9831.39	8079.04	10343.8	8315.43	10547.6	6244.47	8977.11	9400.32	8006.81	9197.47	10400	9396.11	6352.05	9256.06	10238.4	8983.52	11677.7	11012.9	9977.42	581.98	4868.7	7649.59	4860.55	9023.02	7731.98	10837.6	7004.44	13222.6	4558.29	11252.8	11527.3	7237.79	9056.04	5675.09	12128.6
K01091	gph; phosphoglycolate phosphatase [EC:3.1.3.18]	28410.2	29448.4	28732	31677.6	30955.2	46652.9	40331.2	34635.2	29159	30770.8	24527.3	30986.5	22334.3	27967.9	31635.2	24672.1	28200.2	32218.3	31923.1	20712.3	31479.3	27118.6	23736	36904.9	33436.4	34904.6	1691.21	16512.6	22061.6	14556.7	21771.1	22556.6	27789.8	26219.3	43145.4	17010.4	35552	31689	22040.3	30030.1	16197.5	27064.4
K01092	E3.1.3.25, IMPA, suhB; myo-inositol-1(or 4)-monophosphatase [EC:3.1.3.25]	25193.4	26977	25751.8	32375.2	26013.9	41533.9	36457.3	31322.8	26434.4	28765.7	22930.8	28889.7	21201.1	27640.4	30893.2	23705.1	26085.1	30938.3	29418.8	20082.5	30567.9	24487	20881.8	32662.1	29526.9	30753.6	1592.84	15555.8	18769.2	13373.1	24253.5	20510.3	26532.7	25288.4	35931.6	16421.3	34208.3	30316.2	19392.3	28173.3	13933.1	30913.6
K01093	appA; 4-phytase / acid phosphatase [EC:3.1.3.26 3.1.3.2]	68.26	59.8	44.14	4	10.12	5.67	8	8	4.75	26.5	38.12	21	12.5	6.4	19.8	32.1	45.24	24.35	30.25	27	16.35	35	30.43	21	569.62	827.38	3	29	17	6.91	2	5.5	11	0.5	17.3	13	9.65	21.35	16.37	9.4	31	12.75
K01095	pgpA; phosphatidylglycerophosphatase A [EC:3.1.3.27]	6892.15	8991.35	7059.55	9090.09	11229.2	12968.6	8880.67	7682.49	6488.99	7898.57	6459.74	7777.59	5152.99	7545.74	8613.12	5844.09	7186.71	6984.38	8175.78	5048.6	8553.65	7339.02	6291.49	13122.1	6255.47	6655.86	434.86	4089.32	6446.34	3403.24	6208.83	7172.17	7878.34	4650.53	10269.1	2503.17	10212	8222.38	6135.2	6628.31	3910.7	5889.78
K01096	pgpB; phosphatidylglycerophosphatase B [EC:3.1.3.27 3.1.3.81 3.1.3.4 3.6.1.27]	1.43	1.84	3.31	2.67	3.79	25.84	50	39.67	30.45	4.98	2.17	3.29	11.67	1.73	8.8	3.72	3.88	3.27	31.75	7.83	15.52	1	1.93	5.88	5.79	0.38	0	6.83	0	3.91	0.33	0.67	3.67	1.17	0.47	2	7.53	10.6	3.33	17.57	1.83	17.08
K01101	E3.1.3.41; 4-nitrophenyl phosphatase [EC:3.1.3.41]	3641.83	3104.74	4021.83	2256.66	1679.79	3110.16	3466.36	2962.02	2421.74	4446.71	3164.54	3961.48	2846.64	3102.97	3270.83	4057.25	3760.07	4819.41	5032.61	3660.75	4062.04	3226.67	3690.91	3068.91	2895.19	1807.95	155	1505.5	1287	1332.1	4664.2	2071.95	3390.75	4164.69	3475.86	2327	5939.71	4382.67	3001.58	4417.83	2180.88	3176.38
K01104	E3.1.3.48; protein-tyrosine phosphatase [EC:3.1.3.48]	14472.5	15028.8	15237.3	15720.2	13757.5	20840.3	18479.3	15649.9	13296.7	15675.6	13481.9	15739	9521.28	12768.5	13702.6	12064.9	15974.4	15715.8	13829.8	9508.99	12863.3	13229.2	11468.5	15463.6	13615.2	14289.1	729.31	8058.49	9892.46	6217.35	9954.23	9677.18	12552.2	11010	13949.2	6817.59	16233.1	15951.4	10947.6	13037.4	8025	16103
K01113	phoD; alkaline phosphatase D [EC:3.1.3.1]	1490.97	1550.57	1705.98	1551.31	781.67	4069.16	2363.17	1975.06	1686.41	1963.61	2385.28	1880.27	1644.67	1663.68	1895.92	1774.23	2777.28	2053.06	2759.4	2094.75	2451.77	2659.66	1731.21	1719.67	3643.24	4360.76	110.18	1333.84	1093.49	954.83	2279.42	1819.21	2377.74	1122.24	1191.96	715.67	2836.65	3296.83	1652.84	1756.4	1539.54	2105.17
K01114	plc; phospholipase C [EC:3.1.4.3]	478.12	618.38	541.59	136.82	81.16	502.07	267.43	203.95	168.91	373.67	416.87	407	180.12	135.34	234.35	375.01	494.06	514	276.85	222.5	222.59	351.36	316.27	154.76	240.01	311.33	31.4	340.33	354.67	243.83	285	119.84	314.68	163.5	239.82	181.34	681.31	571.75	415.33	113.25	152	205
K01115	PLD1_2; phospholipase D1/2 [EC:3.1.4.4]	351.5	402	388.5	574	82.5	561	482.5	415	334	242	346.5	300.5	194.5	132	159	213	340.5	255.5	89	48.5	86	210	202.5	359.5	294	59	9	60	85	36	116	298	157.5	132	215.5	62	307.5	353.5	331	43	195	18.5
K01117	E3.1.4.12; sphingomyelin phosphodiesterase [EC:3.1.4.12]	0	0	0	0	0	0	0	0	0	0	0	0	0	0	0	0	0	0	0	0	0	0	0	0	0	0	0	0	0	0	0	0	0	0	0	0	0	0	0	0	0	0
K01118	acpD, azoR; FMN-dependent NADH-azoreductase [EC:1.7.1.17]	2132.08	2272.14	1926.21	1862.17	2089.4	4226.83	1951.32	1746.36	1380.08	1352.13	1296.55	1397.21	1447.64	1432.51	1764.04	1235.97	1550.86	1470.84	2304.1	1317.6	1827.78	857.23	1179.03	1308.68	1356.18	2529.16	92.76	1293.65	1277.18	820.92	1037.25	1213.47	1022.09	1476.85	1194.33	792.67	2563.66	1614.69	1290.54	1603.47	1130.92	1013.63
K01119	cpdB; 2',3'-cyclic-nucleotide 2'-phosphodiesterase / 3'-nucleotidase [EC:3.1.4.16 3.1.3.6]	1648.5	1559.81	1563.32	2454.99	1778.93	3536.26	3159.95	2753.93	2254.11	1288.35	1554.85	1456.27	1322.21	1768.17	2091.51	1297.77	1835.63	1662.11	1365.91	680.58	1424.23	781.51	900.05	1384.13	827.83	1398.14	63.48	936.98	1000.66	405.01	571.51	1032.33	590.58	1422.48	1523.48	801.82	2021.79	1638.53	1104.26	916.47	887.33	612.79
K01120	cpdP; 3',5'-cyclic-nucleotide phosphodiesterase [EC:3.1.4.17]	2.33	1.66	2.99	5.66	1.33	12.33	1.34	0.66	0.33	3.67	2.66	0.67	9.74	6.67	0.67	6.34	9.66	2	10.92	7.25	2.67	1.33	1.33	2	6	5.33	0	6.67	3.33	10.33	0	0.67	0.67	0.5	3.66	1.67	4.24	0.66	0.99	0	0	66
K01121	CNP; 2',3'-cyclic-nucleotide 3'-phosphodiesterase [EC:3.1.4.37]	0	0	0.25	0	0	0	0	0	0	0	0	0	0	0	0	0	0	1	0	0	0	1	5.25	0	0	0	0	0	0	0	9	0	1	0	0	0	1	1.25	1	0	0	0
K01126	E3.1.4.46, glpQ, ugpQ; glycerophosphoryl diester phosphodiesterase [EC:3.1.4.46]	20974.8	22482.6	21843.8	30531.5	20763.4	36009.5	31527.8	27039.3	22928.7	24847.6	20803.4	23789.6	18243.7	22223.2	25071.8	20772.9	24232	25786.2	26387.3	18087.4	26341	19551.6	17892.1	28393.3	22199.2	21972.3	1340.71	13378.8	14807.8	12305.7	20992.4	16985.8	20916.9	21056	21816.4	12181.4	26894.6	25443.7	15861.6	23360.7	12625	27339.4
K01129	dgt; dGTPase [EC:3.1.5.1]	14138.7	14877.2	15011.1	16588.5	14972.9	18047.3	16225.6	14105.6	11641.9	14488.4	11364.5	14075.3	9441.56	13965.5	14792	10861.6	13060.4	12934.8	13752.1	8068.31	12575.2	13071.5	10940.2	18415	13734.7	12777.4	688.68	7138.49	9858.96	5601.16	11189.8	10232.3	12393.3	9452.33	14502.5	5613.75	14223.9	13671.9	9174.38	12391.1	7189.7	14590.1
K01130	E3.1.6.1, aslA; arylsulfatase [EC:3.1.6.1]	4293.78	5156	4542.77	5138.79	3830.63	9995.12	6537.81	5141.87	4650.51	5752.53	5957.15	5053.65	3923.86	4755.22	5377.87	5908.64	7276.76	6217.06	5135.74	4152.49	6586.83	6764.24	5040.55	6291.44	10732.8	12689.1	367.83	4634.48	3495.01	3775.93	4847.99	3165.52	4319.93	4840.05	5828.85	4299.82	6823.52	8910.65	4734.71	5248.2	2732.66	4003.6
K01132	GALNS; N-acetylgalactosamine-6-sulfatase [EC:3.1.6.4]	96	46	133	29	9	24	18	6	10	59	36	46	41	103	73	51	45	57	13	14	16	167	161	88	54	17	4	2	17	6	51	24	34	47	51	72	120	158	100	24	27	28
K01133	betC; choline-sulfatase [EC:3.1.6.6]	1753.34	1857.1	1637.54	2100.83	2366.67	3104.16	2526.83	2115.5	1724.5	1249.66	1511.57	1271.87	865.36	1200.17	1222	1252.33	1760.15	1357.83	1325.5	985.17	1501.67	1059.1	922.81	1678.34	1119.34	1777.5	53.7	1180.16	1063.34	454.5	809.17	774.5	585.34	568.5	1098.5	489.5	1732.65	1812.2	1195.03	1404	967.5	1092.33
K01134	ARSA; arylsulfatase A [EC:3.1.6.8]	1109.83	671.16	1406.46	440.15	190.68	380.5	443.83	271.82	206.67	958.01	931.64	803.35	624.16	1267.81	1120.81	1015.65	1129.29	885.5	784.48	739.83	1133.53	2043.66	1665.48	1074.83	1267.51	1073.49	47.32	355.49	317.33	151	867.32	552.5	570.83	595.97	706.49	757.16	1539.96	1711.96	993.84	1117.99	759	1072
K01135	ARSB; arylsulfatase B [EC:3.1.6.12]	173	80	235	61	19	50	40	14	14	98	64	84	74	209	156	97	71	82	42	39	68	316	306	177	115	47	8	15	37	12	108	48	68	94	116	144	220	287	170	73	84	91
K01136	IDS; iduronate 2-sulfatase [EC:3.1.6.13]	418.5	300	521.5	135	62.5	128.5	104.5	58	53.5	427.5	380.5	328.5	247.5	432.5	386	425	496	400.5	337.5	351	485	848	546.5	340.5	678	633.5	13.5	127.5	102	39.5	391.5	206.5	193	165.5	220.5	237.5	586.5	607.5	370.5	487.5	293.5	413.5
K01137	GNS; N-acetylglucosamine-6-sulfatase [EC:3.1.6.14]	379.5	246	501.5	128	54.5	134.5	88.5	34	36	258	215.5	211	172.5	507.5	364	245.5	236	223	143.5	107.5	239	902.5	634.5	380.5	650	599	24.5	61.5	93	56.5	413.5	210.5	170	220.5	245.5	337.5	489	625	369	258.5	219.5	244.5
K01138	K01138; uncharacterized sulfatase [EC:3.1.6.-]	2550.67	3097.76	2737.63	3215.65	2549.54	6038.18	4279.41	3310.21	2930.84	4027.33	4547.6	3562.63	2512.16	3759.59	3738.48	4265.19	6003.31	4631.54	2704.46	2200.58	3745.76	4294.4	3197.77	4056.99	5910.36	6447.07	272.62	2496.64	2266.82	2306.23	2348.64	1682.16	2001.32	3434.27	2057.73	2776.47	4330.75	6037.17	3215.17	3037.09	1744.33	2208.51
K01139	spoT; GTP diphosphokinase / guanosine-3',5'-bis(diphosphate) 3'-diphosphatase [EC:2.7.6.5 3.1.7.2]	3109.57	4181.83	2836.68	7081.92	7310.08	8762.17	7034.59	5900.24	5149.99	4097.73	3702.25	4090.53	2546.37	3642.57	4033.8	3500.13	4294.38	4305.85	3414.28	2633.08	3557.73	2228.75	2366.68	7671.05	3794.04	5159.38	163	2404.83	2014.17	1467.91	3360.33	3017.84	2677.67	2791.53	1630.72	1399.5	3640.44	4130.6	2875.5	2629.07	1724.33	2562.79
K01141	sbcB, exoI; exodeoxyribonuclease I [EC:3.1.11.1]	1242.68	1663.11	1159.5	609.67	2019.12	2141.26	923.74	792.17	726.7	1123.32	1021.57	1351.3	946.32	558.07	767.71	952.17	1255.38	1510.38	1865.69	747.51	1151.9	974.35	1278.82	2196.8	1614.05	2302.12	30.03	365.66	314.17	300.91	628.91	638.92	638.92	429.92	252.14	337.67	1067.62	1504.05	1381.2	921.23	595.32	817.95
K01142	E3.1.11.2, xthA; exodeoxyribonuclease III [EC:3.1.11.2]	16046.3	17791.6	16249.6	22064	19489.1	27447.6	23236.1	19850.1	16741.2	16522.9	14218.4	16617.1	11582.2	15507.7	17785.7	12247.5	16221.1	15759.6	17086.1	10242.9	16892.2	14223.8	11409.7	23372.4	16947.7	17284.1	833.88	9536.82	12056	7127.56	13352.2	14605.5	16291	12678.9	15820.9	7136.43	18053.6	16695.8	11285.4	13864.6	8604.74	16454.2
K01144	E3.1.11.5; exodeoxyribonuclease V [EC:3.1.11.5]	1921.25	1785.83	1857.25	2172.67	2342.5	4014.5	2876.75	2499.58	2057.66	2769.33	3162.16	2626.5	1660.41	2057.18	2393.91	2649.91	4025.75	3099	2122.08	1041.17	2047.33	1257.08	997.33	1873.83	2601	3903.25	96	1593.5	1319.5	861.47	1181.5	1100	1433	1921.67	1653.33	965	2637.74	2616.75	1701.5	1151.5	1005.5	973
K01146	xni; protein Xni	4.26	3.67	2.14	2	1.12	8	46.83	39	46.12	9.39	7.83	12.53	8.62	12.57	1.8	7.01	9.8	12.8	2.37	0	11.56	4	1.76	5.55	5.62	1.88	0	10	8.17	14.91	38	0.67	12	38.5	22.3	3	5.48	8.1	4.17	20.4	2	1.13
K01147	rnb; exoribonuclease II [EC:3.1.13.1]	1818.18	1856.5	1785.98	1718.67	2848.45	2356.26	1234.08	1041.17	890.7	1382.24	1233.84	2324.87	1696.09	2136.57	2761.05	1023.88	1363.95	2618.85	3215.83	1341.59	2918.03	1103.25	1597.02	797.8	1337.55	1522.96	58.33	612.49	565.17	562.41	1420.41	1037.08	867.25	1419.75	495.89	631.67	2957.35	2537.01	1847.83	1858.57	1215.16	1457.24
K01150	endA; deoxyribonuclease I [EC:3.1.21.1]	222.93	529.04	157.2	2419	2097.12	2244.67	850.83	742	651.12	401.39	383.63	372.92	318.01	448.73	503.13	381.34	435.63	381.8	331.36	223.67	494.56	172.2	259.36	2594.38	185.62	201.71	11.4	206	127	158.41	61	63.5	210	281.5	91.3	50	304.61	403.17	283.56	171.06	74.66	324.46
K01151	nfo; deoxyribonuclease IV [EC:3.1.21.2]	13703.2	13721.3	14494.6	13798.6	11059.8	17354.5	17344.2	14906.1	12489.5	14282.8	10702.2	13886.2	10772.2	12879.4	14382.8	11800.1	12311.1	14736.9	15016.4	9739.97	15080.4	11374.5	11842.7	11581.5	14433.6	12900.3	823.1	5848.82	8160.95	6821.36	11753.3	7300.78	10130.2	13322.2	10002.3	7816.24	16198.4	15205.4	9481.84	14795.4	6736.25	15244.7
K01153	hsdR; type I restriction enzyme, R subunit [EC:3.1.21.3]	14383	14804	15565.7	16639.7	16748.1	22176.2	19406.3	16483.6	13802.6	18464.8	16152.8	17910.8	9609.27	14971.8	16347.6	14377	19288.6	17530.3	15348	10162.5	15629.5	14648.6	12467.5	20855.3	13573.1	13711.7	759.48	9039.83	10691.1	6426.45	12456.6	10580.8	12682.2	10788.6	21902.9	5238.09	20771.2	17832.7	12355.5	14775.3	8241.68	12029.6
K01154	hsdS; type I restriction enzyme, S subunit [EC:3.1.21.3]	13111.1	13585	14326.8	15286.2	14829.6	20230.1	17764.8	15032.4	12646	16509	14326	16213.1	8844.82	13254.7	14817.5	12760.5	16767.3	15797.9	14428.9	9297.88	14543.6	12591.9	11232	18699.7	12499.2	12246.6	677.98	7226.83	8699.12	5625.32	11840.6	9826.59	11988.2	9499.33	13815.7	4413.09	16451.8	15203.1	10640	13331.6	8010.85	10761
K01155	E3.1.21.4; type II restriction enzyme [EC:3.1.21.4]	12.92	9.25	15.42	205.5	7.83	416.5	824.75	685.75	633.75	84.17	131.67	87.5	177.5	247.5	226.25	91.08	182.58	134.75	80.5	8.75	111.37	12.75	20.5	3	20.83	19.42	2.5	0	5	35	13	7.33	7.33	114.5	3.33	16.5	32.08	88.83	33.75	34	34	23.33
K01156	res; type III restriction enzyme [EC:3.1.21.5]	685.39	1260.15	586.04	1985.75	1378.29	4528.25	2144.68	1713.32	1579.29	1772.67	2027.75	1478.62	883.25	1048.67	1296.42	1749	2531.25	1871.25	1359.25	1204.17	1615.87	416	513	1595	1179.75	1500.75	64	852	535	655.5	919	705	861.67	1291.36	504	564.5	1224.92	1644.5	1027	1094.5	546.83	1183.33
K01158	DNASE2; deoxyribonuclease II [EC:3.1.22.1]	0	0	1	0	0	0	0	0	0	0	1	0	0	0	0	0	1	0	0	0	0	0	0	0	0	0	0	0	0	0	0	0	0	0	0	0	0	0	0	0	0	0
K01159	ruvC; crossover junction endodeoxyribonuclease RuvC [EC:3.1.22.4]	14806	16364.5	15592.8	19639.5	15901.1	23251.1	21324.3	18235.3	15340.2	16508	13346.8	16087.8	11152.6	14539.9	16320.2	12864.4	15402.2	15906	16447.2	10072.3	16198.4	13659.4	11625	19800	15244.4	14803.4	761.48	8172.66	10560.8	6695.66	13738.9	11220.1	13564.6	11510.7	15664.1	6577.09	17855.2	16622.8	10262.8	13856.1	8000.7	16418.7
K01160	rusA; crossover junction endodeoxyribonuclease RusA [EC:3.1.22.4]	5	10	8	189	8.12	954.67	71	57	50	24	28	20	2	1.4	7.8	5.1	11.1	6.1	2.5	0	8.6	3	6	8	33.62	6.38	0	6	22	5.91	54	20.5	69	1.5	0.96	2	0.4	1.1	1	3.4	6	2.5
K01161	E3.1.25.1; deoxyribonuclease (pyrimidine dimer) [EC:3.1.25.1]	0	0	0	0	0	0	0	0	0	0	0	0	0	0	0	0	0	0	0	0	0	0	0	0	0	2.5	0	0	0	0	12.5	0	0	0	0	0	0	0	0	0	0	0
K01163	K01163; uncharacterized protein	393.14	429.27	519.87	187	168.79	765	383.43	308.95	297.29	440.92	340.08	465.62	545.5	262.67	698.67	366.75	361.83	476.33	947.75	151.17	1301.34	375	298.25	165.5	214.75	260	14	149	142	183.5	764	340.5	304.17	837.36	277	378	1729.83	1009	546.5	398	108.83	325.33
K01166	E3.1.27.1; ribonuclease T2 [EC:3.1.27.1]	1642.5	1857.92	1490	3951.5	3986.5	3620	2591	2282	1820.25	1464.5	1668.17	1453.5	1098.17	1777.5	1855	1386.33	1864.83	1542.75	1267	724	1181	858	832.17	4001.5	1479	2413.5	72.5	1456	1269	555.3	1303	1629	1120	1089	1171.5	623	1503.42	1311.08	1139.25	630	669	583.5
K01167	E3.1.27.3; ribonuclease T1 [EC:3.1.27.3]	88.33	145.33	87.67	1	5	112	7	6	11	31	37	55.33	22	22	19	17.33	50.33	44	7.33	41	18	18	30.33	1	42	39	3	51	49	8	28	16	19	28	8	26	74.5	79	69	47	1	23.67
K01169	rna; ribonuclease I (enterobacter ribonuclease) [EC:3.1.27.6]	60.76	42.91	44.14	2.5	4.62	6	0	1.25	0.75	11.39	21.58	15.29	4.25	5.9	2.05	10.39	13.74	9.1	4.25	2	8.6	34.75	104.18	25.5	63.37	38.63	0	5.5	0.5	4.08	32.25	62.75	44.75	5.75	3.05	4.5	36.86	78.1	60.83	4.15	0	12.25
K01170	endA; tRNA-intron endonuclease, archaea type [EC:4.6.1.16]	4053.16	3513.74	4118.64	3319.5	2489.43	6265	6923.67	6038.91	5118.59	5365.83	4276.16	5043.25	4425.75	4681.49	5350.41	4995.57	5076.88	6308.75	6096.66	4791.75	6508.68	3792.83	4457.32	3786.08	5514.26	5447.41	439.32	2622.16	2795.83	3749.5	3993.33	2884.83	4021.08	6249.9	5551.41	4175.99	6613.4	5778.64	3823.09	7495.82	3034.83	5405.59
K01173	ENDOG; endonuclease G, mitochondrial	247.03	213.22	357.19	959.16	247.28	785.92	943.92	874.66	658.75	403.75	370.85	307.45	654.19	167.01	335.42	318.17	411.91	319.25	1010.83	364.84	467.67	317.18	369.72	185.25	810.54	1240.46	31.53	421	363.33	325.18	451.42	239.42	331.75	260.41	756.24	212.17	571.55	626.94	290.31	365.33	1145.5	483.66
K01174	nuc; micrococcal nuclease [EC:3.1.31.1]	4217.49	4586.99	4597.97	6097	5732.01	7623.67	5931	5198.1	4346	6726.25	4861.57	6885.16	5566.55	6140.32	7238.66	5778.74	5724.64	8231.42	7276.27	5031	7858.18	5546.17	5256.48	5595.33	6883.51	7140.66	421.99	3320.66	3984.33	3815	4720.66	3072.94	4752.49	7657.25	4838.1	4763.99	9136.15	7397.64	4644.67	6939.32	3583.09	9198.23
K01175	ybfF; esterase [EC:3.1.-.-]	127.43	111.84	97.15	312.67	44.12	1151.17	412.16	342.92	303.2	69.98	93.92	71.86	365.37	82.9	159.38	59.67	92.63	65.63	747.87	257.84	403.98	87.75	165.19	78.72	126.05	152.12	5.33	115.99	76.34	88.41	208.41	110.92	134.09	79.92	31.22	19.67	155.65	173.93	118	219.98	221.66	112.79
K01176	AMY, amyA, malS; alpha-amylase [EC:3.2.1.1]	1816.12	1863.03	2774.77	4360.5	4641.12	6380.17	3795.11	3383.58	2726.88	4243.82	2716.36	3825.27	1649.23	3399.98	3609.42	3351.31	3313.95	3807.82	2207.82	1205.5	2514.51	3627.58	3511.51	3231.42	1817.19	1473.03	82.5	1093.49	1147.17	943.92	1335.52	805.79	1281.67	1163.83	968.27	758	4051.15	2444.69	1441.11	1625.97	777.37	1014.47
K01178	SGA1; glucoamylase [EC:3.2.1.3]	52.49	82.33	42.13	79.33	25.01	42.84	152.83	128.66	101.67	206.59	288.32	151.57	32.78	24.66	70.99	189.6	356.88	201.04	94.1	72.5	206.56	38	75.98	96.33	85.68	136.66	6.99	32.66	72.33	38.5	58.66	155.83	122.16	89.15	56.33	29.16	129.09	202.64	163	57.99	105	48.88
K01179	E3.2.1.4; endoglucanase [EC:3.2.1.4]	13119.7	13056.6	14221.9	17091.9	10929.2	19516	16378.6	14077.3	11761.6	16953.3	12989.6	15306.6	12804.8	14284.5	16167.4	14853.5	15193.6	16930.7	18721.6	12871.7	17686.7	14007.3	12958.9	15644	16326.2	13591.5	782.34	6215.67	8309.01	7195	13399	8621.79	11096.7	14644	10648.9	8150.42	20473.9	16343.6	10061.6	17250.3	8763.73	16396.6
K01180	E3.2.1.6; endo-1,3(4)-beta-glucanase [EC:3.2.1.6]	1.33	0.66	1.99	2.66	1.33	3	1.34	0.66	0.33	0.67	1.66	0.67	3.99	3.67	0.67	1.34	2.66	1	9.67	7	2.67	1.33	1.33	1	0	1	0	0.67	3.33	2	0	0.67	0	0	2.66	1.67	0.99	0.66	0.99	0	0	1
K01181	E3.2.1.8, xynA; endo-1,4-beta-xylanase [EC:3.2.1.8]	278.29	154.94	329.22	223.18	84.5	354.67	365.83	286.66	261.32	720.84	711.45	514.58	183.66	147.51	346.16	775.54	1123.62	840.57	338.82	184.01	236.5	332.33	256.66	234.16	1138.51	1514.16	14	352	297.5	362	182.5	86.61	231.33	575.17	93.67	160	355.47	514.4	347.95	353.5	78.76	210.83
K01182	IMA, malL; oligo-1,6-glucosidase [EC:3.2.1.10]	508.16	543.44	839.05	1348.5	1301.01	1716.67	1704.5	1511.6	1266.78	1314.49	841.32	1189.49	537.96	879.09	987.91	1070.15	1013.13	1366.5	549.77	422.25	960.44	1322	1146.65	1041.21	599.01	418.66	47.99	304.66	398.33	458	537.16	377.05	536.33	544.59	852.77	818.99	1593.36	933.72	522.94	601.82	307.09	370.48
K01183	E3.2.1.14; chitinase [EC:3.2.1.14]	291.51	238.52	328.06	196.5	91.95	887.09	447.09	346.74	312.85	446.48	475.81	402.66	602.01	400.34	651.5	414.29	633.2	455.75	667.24	367.17	867.18	402.93	456.05	314.72	292.63	293.71	14.2	196.17	221.33	182.88	234.5	179.67	468.66	411.67	310.32	185.67	856.38	1028.18	306.52	368.25	209.5	510.76
K01184	E3.2.1.15; polygalacturonase [EC:3.2.1.15]	10	4	17	0	3	0	0	0	0	12	17	11	1	0	0	18	21	8	2	11	1	33	7	15	552	800	3	17	9	3	0	0	0	0	0	0	0	0	4	0	0	0
K01185	E3.2.1.17; lysozyme [EC:3.2.1.17]	48.35	92.46	94.71	217	10.65	1011	97.93	78.57	56.41	122.67	203.96	137.91	119.5	94.47	214.94	134.65	243.89	189.32	211.67	69.67	291.37	67	104.13	42.05	62.53	68.14	1	35.33	129.67	61.17	142	116.5	161.34	370.86	72.6	154	217.17	234.03	196.95	234.63	538.83	241.33
K01186	NEU1; sialidase-1 [EC:3.2.1.18]	2116.5	1435.66	2050.18	927.33	902.17	1590.75	1028.17	820.67	735.75	1501.67	1467.5	1447.67	576.84	628.5	672.33	1536.83	1882.32	1987.25	884	612.5	800.67	1325.82	1573.84	969.17	1395.66	1420.17	41.16	762	470	379.5	890.17	728.17	689.33	847.5	347.83	874.5	1133.99	1891.66	1113	787.67	304	531.17
K01187	malZ; alpha-glucosidase [EC:3.2.1.20]	7986.88	9404.73	8491	10684.3	7558.24	14521.4	11364.6	9869.87	8254.91	11397.5	10221.7	10174.9	6602.18	7952.45	8721.86	10166.6	12637.1	11493.3	8855.19	5563.19	8840.88	7761.25	7195.76	9152.75	7670.68	8684.32	365.15	4230.82	4635.5	3458.28	7731.58	4402.7	5901.91	7015.95	5029.43	5440.66	10703.2	10068.3	5990.28	7380.71	4141.54	10820.8
K01188	E3.2.1.21; beta-glucosidase [EC:3.2.1.21]	5	7.5	2	25.5	17.5	19	114	94.5	71	24	39.5	14	2	9	9.5	32.5	50	20.5	5.5	6	10.5	3.5	10	2	8.5	29	2.5	19	13	27.5	7.5	0	8.5	3.5	20	1	31	21	14.5	1.5	4.5	2.5
K01190	lacZ; beta-galactosidase [EC:3.2.1.23]	2012.93	2070.14	2250.77	2420.01	2120.96	4963.16	3528.16	3012.16	2642.1	6203.07	5344.03	5296	3184	3661.41	4472.21	6093.41	7446.61	6898.13	4487.41	2113.34	3803.18	2725.99	1959.02	2819.54	4152.13	5094.37	86	1334.33	935.17	1429.24	1684.83	655.12	1488.01	3942.51	1933.8	1598	3479.07	3061.42	2053.86	2706.07	2008.71	2057.83
K01191	MAN2C1; alpha-mannosidase [EC:3.2.1.24]	1039.5	1300.65	1617.74	2111.99	2546.17	2492.16	2284.66	2078.16	1632.33	2316.65	1425.79	2012.38	735.51	1237.33	1199.75	1911.61	1743.12	2074.66	909.5	1267	1120.51	2703.16	2208.67	1980.5	1903.83	1967.34	47.83	719.5	631	548.5	888	417.34	732.66	284.83	304.83	181.5	2795.65	2095.73	665.87	1528.5	923	1292.42
K01192	E3.2.1.25, MANBA, manB; beta-mannosidase [EC:3.2.1.25]	1186.5	1426.15	1681.33	3703	2774.92	3869.5	3297.67	2968.42	2362.16	2963	1808	2632.42	1100.92	1805.17	1890.08	2542.91	2158.23	2946.41	1421.25	1276.42	1409.09	2451.83	2354	2307.01	1401.42	1340.75	72.33	845.5	754	913	944.17	605.5	912.08	1650.75	2490.42	1337.5	2847.41	2084.66	961.42	1715.83	1022.5	1124.5
K01193	INV, sacA; beta-fructofuranosidase [EC:3.2.1.26]	1550.82	801.14	1562.37	315.5	309.08	442.09	635.29	496.67	401.65	726.6	741.57	806.64	498.22	396.12	500.91	613.85	969.24	1062.67	620.68	347.66	532.97	710	1214.68	345.54	451.52	252.12	31.99	342.99	340.33	282.69	655.19	750.28	669.5	1527.62	368.77	712.99	554.76	741.3	593.83	539.99	316.04	314.71
K01194	TREH, treA, treF; alpha,alpha-trehalase [EC:3.2.1.28]	197.93	150.96	238.4	87.83	94.74	132.67	211.58	194.75	136.91	1033.72	1233.69	840.72	221.48	88.47	180.51	1098.19	1658.77	1116.32	376.12	120.25	290.08	187.19	140.98	63.34	238.9	228.17	7.7	261	186	104.49	173	68.5	161.66	344.83	68.6	62.5	901.11	782.4	417.39	79.3	60.5	266.71
K01195	uidA, GUSB; beta-glucuronidase [EC:3.2.1.31]	181	97	237.67	275	48	490.33	996.5	823	744.5	216.75	253	211.75	253.17	360.4	400.8	240.68	327.93	285.85	303.25	168.67	303.35	170	91.5	85	127.5	176.66	10	127	60	142.19	81.5	34.5	80.84	226.5	95.3	77	179.4	249.1	93	537.9	346.5	486.5
K01197	hya; hyaluronoglucosaminidase [EC:3.2.1.35]	26	25	35	6	5	2	4	2	3	13	31	14	4	3	45	9	54	17	6	3	21	7	26	3	7	80	0	0	0	0	23	10	22	2	21	6	10.17	2	7	38.5	2.5	2
K01198	xynB; xylan 1,4-beta-xylosidase [EC:3.2.1.37]	151.79	117.74	187.77	479.55	85.45	636.45	714	582.38	489.05	184.16	280.41	148.87	104.13	50.05	173.54	176.96	403.75	216.95	143.62	76.76	199.51	134.97	118.02	222.38	35.29	72.25	11.45	314.83	150.12	318.29	139.17	69.61	214.84	452.38	153	129.75	166.58	130.65	114.58	77.88	32.76	82.95
K01200	pulA; pullulanase [EC:3.2.1.41]	523.5	619.5	807.08	1264.83	1309.37	1534.16	1675.86	1471.83	1228.32	1230.7	712.87	1010.18	400.66	622.68	695.67	1037.12	841.75	1107.78	328	327.5	511.54	1162.83	1096.5	1017.5	846.27	878.2	29	239	305.17	304.6	476.7	179.95	512.83	296	183	93	1196.11	723.41	334.11	454	295.88	203.9
K01201	GBA, srfJ; glucosylceramidase [EC:3.2.1.45]	298	295.16	308.66	220	94	785.66	464.83	376	328.5	822	723	714.5	522.5	534.17	757.01	808.66	1005.83	978.33	613	300	657.83	248.5	149.5	202.67	521.5	670.83	10.5	150	153.17	220.33	268.5	140.67	297.17	906.5	349	353.5	424	355.16	276.34	297	170.5	190
K01205	NAGLU; alpha-N-acetylglucosaminidase [EC:3.2.1.50]	8	3	14	0	1	1.66	0	2	0	2	1	0	7	0	18	2	3	0	29	27	9	1	8	0	0	5.66	2	128	0	110.66	54	15	6.34	1	17	0	3.17	0	3	25	4	6
K01206	FUCA; alpha-L-fucosidase [EC:3.2.1.51]	1525.33	1740.98	1643.24	734.67	553.67	2201.96	1421.66	1200.32	1068.15	3831.51	3634.83	3206.34	2056.68	2389.67	2907.91	3935.48	5039.48	4387.16	2810.66	2086.85	3011.5	1835.15	1036.83	1386.66	3477.33	4213.14	75.33	1263.5	706	1090.64	1568	559.34	1255.7	2348.34	1197.99	1070	2416.97	2831.89	1654.6	3544.33	2156	2703.67
K01207	nagZ; beta-N-acetylhexosaminidase [EC:3.2.1.52]	11307.6	12515.5	11844.7	14979	12722	16709.5	17190.3	14653.5	12415.3	12116.5	9992.72	11767.4	8690.27	11774	13142.9	9061.97	11262.1	11003.2	13235.1	7785.35	12820.3	10076.7	8879.04	16575.6	10384.2	11227	633.14	6541.32	8905.12	4980.79	11051.6	9652.03	10979.2	8584.78	13910.5	5381.08	13505.6	12253.6	8356.89	10793.7	5701.58	13784.6
K01208	cd, ma, nplT; cyclomaltodextrinase / maltogenic alpha-amylase / neopullulanase [EC:3.2.1.54 3.2.1.133 3.2.1.135]	3	0	0	2	2	6	5	2	3	0	1	0	1	0	0	2	0	4	5	0	15	0	0	0	8	0	0	0	9	0	0	0	1.33	0.33	0	0	0	0	0	0	0	0
K01209	abfA; alpha-N-arabinofuranosidase [EC:3.2.1.55]	941.67	1027.98	883.81	804.35	752.5	2152.5	1105.5	853.99	814.98	1902	1613	1538.84	891.33	1006.95	1318.99	2014.32	2176.14	2058.83	1249.24	783.52	1050.08	734.66	607.49	1049.99	1310.34	1495.16	29	805	415.5	683.67	551.5	241.72	572.5	1937.51	512.33	413	1152.83	1412.48	882.5	1505.83	620.76	928.25
K01210	E3.2.1.58; glucan 1,3-beta-glucosidase [EC:3.2.1.58]	2.5	0	2.83	0	9	0.67	0	0	0	1.17	3	0.67	1.5	0	0	0	0.33	0.5	2.5	33.5	0	99.5	9	45	1656.67	2400	9	51	0	23	0	0	0.33	0	0.67	0	1.33	0	2	0	0	0
K01212	sacC, levB; levanase [EC:3.2.1.65]	24	48.33	40	18.34	10	34	30	23.33	19.66	8	7	19.12	35.33	65.67	95.33	7.12	12.25	10.12	83.33	117.67	168.33	8.33	17.33	16.33	9	39	1	170	15	137.67	74	19	46	66.67	63.33	30	40.45	60	8	463.5	267.5	304
K01214	ISA, treX; isoamylase [EC:3.2.1.68]	0	1	1	0	0	0	1	1	0	2	1	1	4	0	11	2	1	1	1	0	10	0	0	1	0	0	0	0	0	0	0	0	9	0	6	2	1	0	2	0	11	0
K01215	dexB; glucan 1,6-alpha-glucosidase [EC:3.2.1.70]	26.34	22	37.08	41.83	28.87	61.83	83.53	52.33	60.66	12.36	7.29	7.65	13	6.2	20.25	12.34	8	13.33	12.25	16.5	32.46	0.67	1	7.33	3.27	1.2	0	12	10	4.6	7.2	10.67	18	1	9	0	9.17	1.08	3.22	10	55	3.4
K01216	E3.2.1.73; licheninase [EC:3.2.1.73]	62	62	88	42	51	738	275	223	228	122	206.33	123	85	49.67	37	66.33	250	68	33	40	88	217	158	211	169	180	4	55	38	42	121	85	204	56	26	52	327.33	549	125	54	34	117
K01217	IDUA; L-iduronidase [EC:3.2.1.76]	0	0	0	0	0	0	0	0	0	0	2	0	0	0	0	0	2	0	0	0	0	0	0	0	0	0	0	5	0	0	0	0	0	0	0	0	1	0	0	0	0	0
K01218	gmuG; mannan endo-1,4-beta-mannosidase [EC:3.2.1.78]	152.5	81.33	166.06	24	60	70.34	83	66.5	64.5	840.18	678.83	516.18	137	95.17	204.5	876.81	951.3	743.5	261.5	115.5	139	266.5	114.5	297	932.68	1098.66	6	73.5	45	96.66	132	61.22	149.16	307.5	57.68	71.5	217.77	373.74	200.83	299	30.38	120.5
K01219	E3.2.1.81; beta-agarase [EC:3.2.1.81]	91	40	129.64	34	10	33.36	26	8	8	53.36	32	47.08	37	104	83	49.72	37.14	41.72	29	24	52	158	154	89	68.36	36	4	22	24	11	56	24	36.64	47	70.36	72	117.36	145	86	49	58	63
K01220	E3.2.1.85, lacG; 6-phospho-beta-galactosidase [EC:3.2.1.85]	24	28	39	7.33	35.67	13.33	80.33	54.33	38.33	13.34	5.67	9.67	5.67	4.27	3.25	9	7.33	3.33	2	10	13.7	7.33	0	4.33	19.67	22	9	53	50	22	17	17.67	47	12	14	10	2.51	4	1.33	11	0	5
K01222	E3.2.1.86A, celF; 6-phospho-beta-glucosidase [EC:3.2.1.86]	280.92	213.49	307.23	132	53.86	112.5	154	108	108.5	179.97	144.32	147.04	181.67	138.67	202.8	171.55	201.71	203.1	321	437.17	292.1	219.5	191.72	86.5	107.36	148.64	19	152	109	110.34	179.5	109.61	284	81.5	168.3	44	172.33	199.43	152.57	290.4	192.38	313.75
K01223	E3.2.1.86B, bglA; 6-phospho-beta-glucosidase [EC:3.2.1.86]	173.27	142.54	187.74	339.66	124.37	439.17	628.99	425.23	442.23	204.48	193.28	158.71	144	75.95	232.9	200.69	215.9	180.46	128	128.83	279.23	96.35	106.34	96.54	106.38	89.56	14	257	178	104.45	145.9	146.17	368	434.36	192.9	35	245.41	129.1	172.35	223.2	236.02	118.55
K01224	E3.2.1.89; arabinogalactan endo-1,4-beta-galactosidase [EC:3.2.1.89]	95.26	46.91	98.3	39	46.5	44.16	175.5	158	130	390	360.12	255.5	64	44.5	86	426	529	366.5	121.25	33.5	81.75	153.5	87.43	137.5	482	550.66	6.5	168.5	40.5	209.16	70.5	29.61	113.34	159	27.5	48	119.58	170.16	117.62	126.5	19.38	39.75
K01226	treC; trehalose-6-phosphate hydrolase [EC:3.2.1.93]	107.4	90.07	112.51	137.5	47.11	150.67	207.13	151.57	129.24	113.09	123.2	93.56	62.33	56.87	105.8	100.47	152.04	115.35	49	91	140.47	159.5	117.76	80.88	96.72	75.08	14	74	107	74.51	144.7	90.61	198	225.36	85.3	20	215.66	158.18	131.77	192.4	131.38	143.15
K01227	E3.2.1.96; mannosyl-glycoprotein endo-beta-N-acetylglucosaminidase [EC:3.2.1.96]	24.68	22	37	3.33	19.67	8.33	1.33	0.33	0.66	14.32	9.01	46	1	1.94	0	17.01	8	68.33	1	0	3.35	8.01	1	1.33	0.67	0	0	0	0	0	5	3.78	16	0.5	2	0	3.52	0	0	0	3.38	3
K01230	MAN1; mannosyl-oligosaccharide alpha-1,2-mannosidase [EC:3.2.1.113]	0	0	0	0	0	0	0	0	0	0	0	0	0	0	0	0	0	0	0	0	0	0	0	0	4	0	0	0	0	0	0	0	0	0	0	0	0	0	0	0	0	0
K01232	glvA; maltose-6'-phosphate glucosidase [EC:3.2.1.122]	2.66	7.39	9.57	72	16.41	108.67	166.43	114.57	124.29	11.14	13.95	8.58	17	3.4	30.8	11.39	18.24	13.1	7.5	12	20.6	0	14.86	10	8.62	0.38	0	54	12	5.91	0	6.61	49	17.86	26.3	10	9.61	9.1	13.06	11.4	3.38	10.5
K01233	csn; chitosanase [EC:3.2.1.132]	3	4	9	0	0	0	0	0	0	3	3	9	1.75	0	8	0	6	27	1.25	0.25	0	7	6	0	0	9	0	0	0	0	8	10.11	0	3	1	0	0.17	3	1	0	8.38	0
K01235	aguA; alpha-glucuronidase [EC:3.2.1.139]	96.67	45.16	105.41	46.34	17.5	71.5	48.5	45.83	27.66	169.5	186.5	132.17	59.33	68.67	117.83	164.5	219.99	202.83	127.33	87.17	93.67	53	67.33	55.33	40.67	100.33	2	124	54.5	143.5	49.5	28.5	88.5	136.67	24	35.5	96.83	124.58	117.5	198.5	38	95.5
K01236	treZ, glgZ; maltooligosyltrehalose trehalohydrolase [EC:3.2.1.141]	1667.99	2303.66	1499.68	658.48	645.66	990.32	1260.84	1129.15	919.41	1777.18	1536.71	1723.37	1075.68	1422.67	1516.34	1648.67	1775.81	1871.08	1841.33	1278.33	1716.18	1283.09	1702.3	1596.34	2435.16	3178	70.53	578.17	782.33	717.46	1488	1210.51	1436.01	926.33	624.31	1176.34	2102.53	2607.77	1223.93	2340	1161.33	2411.17
K01239	iunH; purine nucleosidase [EC:3.2.2.1]	2184.23	2023.75	2296.83	3208.66	2402.01	3271.09	2739.25	2333.41	1851.5	2283.08	1886.38	2068.28	2258.45	2482.32	2950.49	2145.71	2179.38	2270.84	3623.32	1956.33	3103.43	2102.6	1496.62	2341.75	2277.83	2916.33	109.02	1381.66	1311.33	1009.5	1880.16	1622.5	1804.15	1654.48	1806.4	873.66	3269.71	2121.72	1394.26	2263.24	1271.5	1834.84
K01241	amn; AMP nucleosidase [EC:3.2.2.4]	2335.18	2760.57	2159.84	3349	2880.62	5026.33	3965.08	3402.25	2836.83	2785.14	2880.31	2694.4	2012.61	2561.07	3200.8	2685.22	3359.12	3068.35	2695.08	1664	3169.1	1188.27	1224.56	2552.59	2188.62	3350.54	122.7	1844.83	1618.67	1284.04	1732.5	1583.5	1666.17	2393.5	1841.05	1296.5	3081.42	2720.47	1967.11	2189.15	1346.83	1902.08
K01243	mtnN, mtn, pfs; adenosylhomocysteine nucleosidase [EC:3.2.2.9]	1357.55	1781.02	1457.4	1649.88	723.78	3568.28	1943.37	1645	1406.03	1841.01	1502.7	1653.54	1487.02	1272.36	1558.17	1617.83	1827.54	1779.46	2234.96	1303.42	1956.95	1751.89	1401.18	1265.18	1926.15	2601.21	64.45	712.99	762.46	621.76	1012.45	749.87	1172.26	1996.04	1451.44	873.25	2221.03	1781	1248.86	1574.11	884.47	899.6
K01244	MTN; 5'-methylthioadenosine nucleosidase [EC:3.2.2.16]	59	6	52	2	5	5	3	3	6	60	12	35	21	31	37	65	10	47	43	5	4	25	20	17	27	29	0	0	0	0	0	5	1	98	0	15	16	24	37	97	3	25
K01246	tag; DNA-3-methyladenine glycosylase I [EC:3.2.2.20]	4930.9	6114.66	4957.21	9272.08	8387.61	10864.8	9876.79	8315.42	7219.89	7386.44	6985.02	7093.58	4441.69	6535.55	7550.87	6248.59	8334.77	7490.46	7043.56	4257.93	6997.52	4586.52	3895.98	9533.47	6029.57	8077.23	274.03	4178.49	3432.84	2973.31	5292.61	4545.76	4344.76	4710.89	3809.57	3208.34	5708.7	6051.46	4801.88	5612.9	2947.32	4823.91
K01247	alkA; DNA-3-methyladenine glycosylase II [EC:3.2.2.21]	7738.57	7638.43	7679.14	9588.15	6830.88	13616.2	11662.3	10025.2	8388.5	8756.15	7266.37	8429.57	7202.9	8718.65	9654.86	7817.62	8416.58	9635.76	8998.6	6081.84	9654.55	7537.1	6947.7	7891.42	10486.9	9844.44	493.18	4115.32	4870.33	4089.34	5217.16	5880.39	8152.25	8870.49	6808.72	5506.16	11072.3	9887.01	5888.97	9100.71	4731.04	10059.4
K01250	rihA; pyrimidine-specific ribonucleoside hydrolase [EC:3.2.-.-]	13.9	21.48	22.6	123.5	35.29	196	218.93	174.18	138.29	68.46	62.66	93.58	56.39	20.9	33.96	66.71	53.41	125.6	42.61	46.67	30.6	25	16.43	22	46	91	14	54	64	80.2	42	53	81.83	284.8	30.91	22	44.43	39.75	40.44	18.07	23	26.56
K01251	E3.3.1.1, ahcY; adenosylhomocysteinase [EC:3.3.1.1]	18139.8	19004.6	18645.5	21316.7	16823.2	26618.8	26119.6	22358.9	18883.2	20618.1	17319.8	20082.8	15152.6	18572.4	21040.2	16937.2	20071.5	21330.2	22184.8	14946.1	22318	16049.8	14567.1	22223.2	20288	19748.3	1119.85	10391.7	12694.8	9796.38	17211.2	13671.1	17195.6	17553.2	20716.6	10356.3	23346.7	21324.9	13796.9	20896.5	10832.3	21462.8
K01252	entB, dhbB, vibB, mxcF; bifunctional isochorismate lyase / aryl carrier protein [EC:3.3.2.1 6.3.2.14]	2.38	5.91	3.47	27	48.12	43.67	35.33	37	33.24	56.14	15.95	41.62	100.83	24.4	131.8	18.72	7.71	22.1	233.91	81.33	307.35	17	5.43	12.76	14.62	14.38	2	7	86	21.91	10	92.61	28	128	466.63	158	42.11	13.1	10.28	76.4	45.38	25.08
K01253	EPHX1; microsomal epoxide hydrolase [EC:3.3.2.9]	3	3.91	4.67	9	8.67	8.33	3.67	5.67	5.42	2.83	1	2	111	32.67	54.33	0.66	2.32	2.58	0	7	4.67	2.33	0.67	0	3	0	0.33	14	9	0	10.67	20	48	7	172	2	3	0.25	0.92	7	0	12
K01255	CARP, pepA; leucyl aminopeptidase [EC:3.4.11.1]	14763.5	15825.7	14947.6	19817.8	17633.4	22343.6	20488	17596.4	14683	14928.7	12502.4	15169.3	9889.25	14641.6	15666.6	11215.9	14100	14295	14361.2	9589.51	13969.6	13783.9	10911.6	22155	14397.5	16046.2	756.98	8614.33	11572.8	6224.76	13917.9	13794	16290.4	10060.4	15492.1	6789.76	16073.1	15235.4	10149.2	13380.6	7757.08	15779.4
K01256	pepN; aminopeptidase N [EC:3.4.11.2]	6196.34	8129.17	6260.25	9238.9	9665.98	12041.1	9806.61	8254.48	7043.18	8519.69	7379.08	8792.29	5127.55	6750.96	7565.05	6486.49	8729.51	9062.7	8181.53	5124.93	7127.87	6553.85	5020.81	11814	6120.4	7378.07	419.03	4945.33	6667	3552.98	6214.27	7197.59	7747.25	5268.42	11001.5	3481.68	8466.16	7219.28	5426.34	5927.32	4061.32	5119.18
K01258	pepT; tripeptide aminopeptidase [EC:3.4.11.4]	2493.21	2366.31	3036.67	3281.13	2630.07	4268.46	3577.46	3057.26	2557.8	4342.77	3404.82	3922.55	2046.1	3472.09	3725.67	3539.22	4224.92	3923.1	2939.17	1681.05	2950.12	3797.79	2756.92	2807.47	3811.34	4164.26	130.45	1389.83	1091.62	1119.51	1798.03	1479.73	1725.5	2613.96	1642.85	1283.75	3462.45	2870.78	2071.03	2723.62	1592.8	2184.47
K01259	pip; proline iminopeptidase [EC:3.4.11.5]	4312.99	5510.75	4187.86	6381.16	8121.66	8253.75	5992.83	5071.77	4250.66	5401.51	4322.64	5770.27	3088.99	4922.34	5375.08	4122.08	4907.14	5813.74	4708.77	3789.76	4812.25	5200.02	3812.21	10132.3	5928.51	7397.57	237.53	3405.33	4005.67	2071.5	3716.83	5036.28	5708.49	3280.1	9832.52	1849.34	6897.21	5282.78	4048.36	4779.08	2325.54	2804.89
K01261	pepA; glutamyl aminopeptidase [EC:3.4.11.7]	26.17	28	39	39.33	44.87	64.33	156.53	102.33	96.33	25.12	13.29	37.07	11.67	6.2	8.25	24.92	12.83	50.58	6.5	19.5	17.87	7.5	1	8.33	32.27	27.2	9	32	50	24.6	27.2	17.67	49	6	15	5	10	5	4.33	16	55.5	7.4
K01262	pepP; Xaa-Pro aminopeptidase [EC:3.4.11.9]	21988	21931.2	23152.3	24984.5	18923.4	32013.2	30463.1	26295	22043.6	25576.8	20668.5	24813.3	17963.9	21860	24817.8	21455.3	24318.3	27007	25961.1	17112	26076.7	20139.7	19136.9	25197.5	23070.3	22369.8	1253.63	12281.1	14427.3	11047.1	19516.9	15312.5	20390.8	22113.1	25105	13563.8	29250.6	26903.5	16801.8	24975.6	13214.6	24767.9
K01263	E3.4.11.14; cytosol alanyl aminopeptidase [EC:3.4.11.14]	5	2	9	1	1	1	1	0	0	7.25	7	3.24	92.12	4	93	12.62	5.25	9.37	228.12	70	269.88	1	2	1	0	0	0	0	0	3	0	0	8	27	1.66	0	1.12	2	5	77	19	8.38
K01264	APE3; aminopeptidase Y [EC:3.4.11.15]	0	0	0	0	0	0	0	0	0	0	0	0	0	0	0	0	0	0	0	0	0	0	0	0	0	0	0	0	0	0	0	0	0	0	0	0	1	0	0	0	0	0
K01265	map; methionyl aminopeptidase [EC:3.4.11.18]	20052.4	21099.9	21068.5	24316.2	18802.9	31094.4	29025.4	24904.7	20944.3	23484.9	19197.1	23315.7	16850.5	20662.1	23460.2	19323.7	22327.8	25107.9	24148.2	16360.8	24520.6	18696.5	16928	24873.4	22090.9	21830.9	1221.33	11514.3	13959.5	10865.9	18933.1	15073.8	18888.8	19959.3	22661.1	12337.8	26235	24234.8	15067.2	22802.8	12176.3	23324.1
K01266	dmpA, dap; D-aminopeptidase [EC:3.4.11.19]	1833.66	2249.54	1671.03	2697.5	2449.83	4045.66	3019.34	2573.48	2147.32	1691.17	1779.06	1585.2	1241.57	1555.84	1880.83	1609.67	2012.98	1702.5	1461.45	1201.17	1784.5	655.1	898.12	2131.17	808.5	1395.66	97.2	1469	1195	844.5	1063.5	1088.67	1030.17	1521.61	1450.68	881.17	1950.64	2008.36	1529.02	1084	496	1022.56
K01267	DNPEP; aspartyl aminopeptidase [EC:3.4.11.21]	542.47	493.62	474.06	694.16	170.95	2411.59	1645.93	1397.86	1267.62	854.42	776.14	871.15	1097.94	1046.67	1270.74	714	1019.16	980.41	1617.99	664.51	1220.92	432.18	517.97	343	455.26	640.24	46.03	485	284.83	592.5	1094.08	582.25	569.58	1509.61	637.41	642.84	488.29	537.27	437.52	763.08	564.16	687.16
K01269	E3.4.11.-; aminopeptidase [EC:3.4.11.-]	0	1	0.25	0	0	0	0	0	0.33	0.33	0	0.33	0.33	0.27	0	0	1	1	0	0	0.67	1	5.25	0	0	0	0	0	0	0	9	0	2	0	0	0	1.18	1.25	2	0	0	0
K01270	pepD; dipeptidase D [EC:3.4.13.-]	995.65	1084.41	1056.52	644.26	468.41	2307.17	1312.34	1091.57	1019.57	2646.56	2547.41	2298.32	1875.04	1498.58	1976.12	2596.26	3535.74	3059.8	2865.95	1087.59	2192.14	814.58	697.85	831.05	1442.71	1831.21	45.83	706.16	423.84	682.08	856.75	434.26	818.92	2305.95	1212.05	958	1272.31	1337	1217.18	1332.15	669.33	789.29
K01271	pepQ; Xaa-Pro dipeptidase [EC:3.4.13.9]	2199.66	2214.13	2407.71	1945.88	1161.11	3098.45	2927.45	2523.13	2137.33	2714.6	1870.52	2897.47	2185.96	1881.16	2582.66	2037.96	2032.37	3134.99	4147.32	2077.23	3358.28	2871.99	2217.97	2332.39	2566.31	2592.2	131.15	899.33	1133.63	1321.46	1596.62	1347.04	1689.74	1851.7	1210.69	835.25	3338.63	2516.74	1542.66	3082.69	1285.09	2147.41
K01273	DPEP; membrane dipeptidase [EC:3.4.13.19]	3272.47	4132.08	3607.73	4131.27	3579.61	6712.93	5838.5	4960.76	4131.37	5919.27	5425.94	4847.53	3886.27	3999.63	4862.87	5686.12	6559.6	5751.85	7160.93	5685.05	7182.04	3777.13	3147.72	4492.89	3938.86	3381.43	166.81	2723.17	2549.45	2111.99	5160.42	2310.77	4006.59	2798.24	3403.41	1502.76	8043.49	6669.53	4011.59	6842.79	3113.88	4987.48
K01274	E3.4.13.-; D-alanyl-D-alanine dipeptidase [EC:3.4.13.-]	53.25	50.83	71.75	7.67	51.17	18.83	87.08	58.41	41.99	672.34	875.67	469.17	111.25	35.67	105.33	679.75	1272.08	682.33	269.08	58.17	245.23	16.41	14.33	12.16	20.17	31.25	9	50	67	41.17	30.5	17.67	52.5	2.67	30.83	16.5	192.66	203.25	193.33	38	54	20
K01277	DPP3; dipeptidyl-peptidase III [EC:3.4.14.4]	329.75	374	305.25	217	221	670.5	377.25	312.25	284.5	1218.5	1381.5	1068.5	602.75	642.5	783.25	1171.75	1976.25	1413.5	1004.25	326.5	851.5	182.75	183.5	277	174	314.75	13	305.5	147.5	266	269	88	238.5	606	531	291	599.5	559.75	533	436	186	384
K01278	DPP4, CD26; dipeptidyl-peptidase 4 [EC:3.4.14.5]	2091.41	2847.32	2105.24	3333.49	2007.83	6442.32	4309.08	3556.57	3101.99	4236.34	4509.65	3730.7	2664.31	2587.68	3374.25	4106.04	5791.83	4631.11	3699.99	2188.5	3991.76	2002.57	1781.33	3339.34	2416.66	2916.92	119.33	2023.67	1409.67	1628.5	2230	1219.68	2386.67	2790.17	1700.9	1340.17	3652.1	4526.24	2685	2543.5	1974.5	3382.93
K01281	pepX; X-Pro dipeptidyl-peptidase [EC:3.4.14.11]	184.17	114.5	292.5	112.83	47.37	99.83	122.03	104.33	83.83	161.04	123.71	125.57	79.17	152.2	210	153.17	172.66	221.33	88.5	97.5	184.87	241.5	191.5	131.33	93.77	95.2	4	66	127	87.1	95.7	52.67	51.5	60.5	146	115.5	232.17	372	169.66	108.5	251	88.9
K01283	ACE, CD143; peptidyl-dipeptidase A [EC:3.4.15.1]	208.66	226.24	203.99	150.32	129.33	232.16	383	327.99	278.58	343.51	381.15	335.84	226.66	312.67	451.34	318.67	408.16	367.41	449.67	321.83	475.34	237.99	139	173.84	245.66	346.84	16.83	130.67	136.5	220.5	428.5	282.01	548.5	182.5	169.57	52.17	363.98	262.74	197.91	179	202.5	220.67
K01284	dcp; peptidyl-dipeptidase Dcp [EC:3.4.15.5]	2582.76	2368.71	2545.98	2698.18	2621.29	4244.75	3453.33	2946.83	2382.4	4394.31	4894	3920.65	2543.73	2827.91	3505.79	4341.34	6408.97	4803.47	3555.65	1448.67	3175.77	1610.33	1216.76	2192.83	2761.12	3895.71	111.5	2080.83	1487.17	1280.38	1475.33	1164.84	1582.34	2895.01	2260.04	1218	3096.39	2890.77	2383.34	1831.74	948.83	1550.84
K01286	E3.4.16.4; D-alanyl-D-alanine carboxypeptidase [EC:3.4.16.4]	2443.31	2341.81	2283.06	4946.82	4461.89	4645.5	3610.58	3198.57	2573.74	2473.75	2623.89	2538.96	2136.56	2377.02	2796.25	2494.6	2905.97	2909.08	3052.34	1824.17	2783.26	1624.92	1581.23	4417.17	3668.95	5134.81	120.83	2491.84	1928.16	1268.13	1343.32	1422.04	2155.08	1884.75	1677.98	916.51	3146.56	2764.4	1904.42	1893.58	1526.38	1605.63
K01295	cpg; glutamate carboxypeptidase [EC:3.4.17.11]	1277.99	2047.09	1125.2	3014.99	2701.16	2724.49	2013.5	1728.1	1419	2105.33	1796.39	1965.32	1051.74	1576.01	1764.32	2021.95	1983.23	2136.78	1599.78	1129.84	1693.51	1304.27	1227.3	4124.51	2901.09	3785.33	70.03	648.16	788.17	666.5	1722.67	1983.67	1520.84	862.94	491.27	405.17	2609.16	2211.69	1279.02	1052.83	957	842.39
K01297	ldcA; muramoyltetrapeptide carboxypeptidase [EC:3.4.17.13]	2291.81	2838.41	2523.09	3790.38	2319.74	6082.2	4165.1	3516.22	2935.15	4105.15	4134.81	4209.27	2546.34	3597.96	4065.77	3649.8	5131.69	4956.02	3934.23	2822.42	4221.45	1982.98	1948.14	3086.3	2755.96	3262.01	132.32	2130.16	1492.29	1597.16	2494.33	1948.28	2196.84	3134.18	1757.9	1533.92	3687.99	3832.87	2426.85	3251.7	2058.42	3442.75
K01299	E3.4.17.19; carboxypeptidase Taq [EC:3.4.17.19]	6590.21	5984.92	6859.07	6410.66	4664.84	9209.83	8398.93	7281.42	5917.28	8127.31	6634.73	8088.9	6225.97	6922.59	7716.57	7641.18	7728.97	9747.58	8975.6	7066.08	9105.19	6457.33	6389.65	6519.18	7768.37	7392.46	414.65	3569.66	3878.83	3765.18	5023.33	3858.11	5653.74	8382.7	7391.68	5628.49	10866.5	8833.97	5625.19	8796.15	4811.71	5234.41
K01301	NAALAD; N-acetylated-alpha-linked acidic dipeptidase [EC:3.4.17.21]	106.83	87.83	151	234.33	33	327.66	142.33	98.33	89.67	214.5	228.66	214	245.67	292	325.67	239.33	296.5	316.66	162	129	266.34	139.17	145.5	98	97	67.67	6	110	95	73	98	38	145.17	351	74	111	354.33	479.17	209.5	118.33	93	68.5
K01302	CPQ; carboxypeptidase Q [EC:3.4.17.-]	377.5	797	288.5	937	672.5	1610	1119.5	893.5	833	692.5	697.5	571.5	417.5	442	664	668	761	670	543.5	651.5	991	130	265	995.5	222	303.5	37	410	290	393	582.5	446	418.5	728	310	362.5	668	831.5	520.5	589	161	744
K01303	APEH; acylaminoacyl-peptidase [EC:3.4.19.1]	22.5	21.5	28.25	122	19	65.33	240.33	196	160	679.5	883	475.86	107.24	29.17	74	695.12	1283.92	718.95	248.24	79	210.09	18.5	26.75	7.17	10	7.5	0	42	12.17	16	49	9.17	8.5	7	21.5	7	214.12	234.75	203.84	37	48	21.26
K01304	pcp; pyroglutamyl-peptidase [EC:3.4.19.3]	700.06	805.61	792.76	759.83	269.08	853.83	673.76	521.01	427.12	764.23	623.41	1319.03	588.56	555	716.83	776.82	652.69	1832.7	949.94	1122.17	1117.5	577.5	526.34	319.33	1133.29	1434.38	33.5	402	318	279.68	431.5	185.78	353.16	717.63	376.36	452.5	1796.99	1204.83	696.33	1168.5	484.38	617.73
K01305	iadA; beta-aspartyl-dipeptidase (metallo-type) [EC:3.4.19.-]	178.5	173.29	142	48	25	42	61.5	61.63	51.58	86.47	56.63	64.24	357.2	69.9	136.88	80.89	65.74	71.85	690.62	273.5	240.9	63.75	208.75	50	82.75	58.75	7	97	33	20.2	65.75	91.75	211.58	243.75	64.55	30.5	53.61	129.1	140.54	99.15	115	66.88
K01308	yqgT; g-D-glutamyl-meso-diaminopimelate peptidase [EC:3.4.19.11]	184.16	191.49	165.08	118.75	39	136.5	49.75	42.75	23.25	132.84	108	109.16	110	67.5	125.5	109.83	131.49	144	172	223.5	179.5	145.84	201.66	89	127.5	88	12	73	74.5	31.5	48.5	56.61	258	232.5	98	25	184.37	165.92	131.22	69.5	53.38	109
K01312	PRSS1_2_3; trypsin [EC:3.4.21.4]	3	1	6	0	0	0	0	0	0	0	0	0	0	0	0	0	0	0	0	0	0	1	6	0	0	5	0	0	0	0	7	10	0	0	0	0	0	0	1	0	0	0
K01318	sspA; glutamyl endopeptidase [EC:3.4.21.19]	0	24	8	9	64	9	296	189	145	21.75	1	26.75	4	10	5	5.25	2	5.25	2.25	5	9.25	28	0	12	76	88	36	65	204	96	48	52.11	188	6.5	14	7	1	3	5	10	1.38	6
K01322	PREP; prolyl oligopeptidase [EC:3.4.21.26]	1671.16	1870.48	1739.4	2022.65	996.99	3226.49	2605.84	2276.48	1850.07	3975.43	4232.73	4079	2415.6	2460.18	3176.42	3793.21	5458.4	5303.03	4055.04	2702.67	4099.64	2090.4	1418.16	2163.92	3808.99	4851.09	102.33	1424.34	1278.83	1281	2298	1639.51	2514.83	2253	1463.72	1611.34	3594.84	2987.98	2026.15	3304.92	2012.5	3664.38
K01337	E3.4.21.50; lysyl endopeptidase [EC:3.4.21.50]	55	59	78	41	51	738	275	223	225	115	202	119	83	48	37	62	238	55	33	40	88	212	153	211	168	180	4	55	38	42	121	85	204	56	26	52	321	540	116	54	33	117
K01338	lon; ATP-dependent Lon protease [EC:3.4.21.53]	19771.8	21633.5	21427.7	25321.1	22194.3	30273	26228.4	22541	18806.9	23309.4	17531.8	22747.5	15689.3	20671.7	23902.3	17312.3	19843.7	21143.8	24852.7	14199.5	24504.1	20291.3	17456.7	28626.2	20840.1	20069.5	981.51	10315.7	13125.1	8765.86	20615.3	14802.3	18320.5	14447.2	18121.8	8197.44	27615.7	23541	14919.6	19873	10849.9	22518.3
K01342	aprE; subtilisin [EC:3.4.21.62]	116.33	183.33	116	79.5	94	102.5	83	87	53	328.67	242	276.33	191	196.27	235	299.5	230.33	307	451	628	617	118.67	114.33	61	79	14	3	20	119	23	73	154.11	138	152.5	492	165	1093.68	468.67	338	839	221.38	154.34
K01347	iga; IgA-specific serine endopeptidase [EC:3.4.21.72]	0.17	0	2	0	0	0	0	0	0	0.33	0.67	0	0	0	8	0.17	0.5	0	0	0	0.17	0.17	0	0	0	0	0	0	0	0	0	0	0	0	0	0	0.67	0	0	0	0.5	0
K01350	PRTN3; myeloblastin [EC:3.4.21.76]	0	0	0	0	0	0	0	0	0	0	0	0	0	0	0	0	0	0	0	0	0	0	0	0	0	0	0	0	0	0	0	0	0	0	0	0	0	0	0	0	3	0
K01354	ptrB; oligopeptidase B [EC:3.4.21.83]	705.01	743.64	739.76	981.01	598.12	1458.25	1426.24	1214.5	997.15	1801.89	2143.32	1502.63	1041.61	812.58	1002.45	1770.71	2797.48	1929.17	1944.06	1281.01	1274.72	871.1	675.82	774.93	1985.54	2591.04	88.53	1542.16	2269.34	879.21	1048.75	647.26	1337.25	816.09	621.13	269.5	1533.98	1737.8	1035.8	1008.82	1230.16	1276.5
K01355	ompT; omptin [EC:3.4.23.49]	0	0	0	0	0	0	0	0	0	0	0	0	0	0	0	0	0	0	0	0	0	0	0	0	0	0	0	0	0	0	0	0	0	0	0	0	0	0	1	0	0	0
K01356	lexA; repressor LexA [EC:3.4.21.88]	13754.2	14987.7	14499.8	14896.5	13068.9	19346.5	16695.4	14205.2	11965.2	13378.2	10354.3	13392	9501.59	12411.5	13597.2	9995.33	11475.7	12663.5	13655.3	8325.11	13197.4	12219.2	10882.2	16152.2	13692.1	12630.6	694.81	7164.49	9560.79	5751.74	11459.8	9633.62	12527.2	9633.32	14543.1	5776.59	14807.4	14374	8955.11	12239.2	6236.75	14419
K01358	clpP, CLPP; ATP-dependent Clp protease, protease subunit [EC:3.4.21.92]	17145.8	18755.9	17994.6	22668.4	16926.3	26324.9	23996.1	20471.3	17166.6	19241.2	16333.3	20300.6	13313.1	16689.2	18819.5	15384.5	19101.5	21826.7	19700	12794.9	19387.3	15965.4	13284.6	21492.8	17835.6	18268.5	886.01	9884.33	11816.6	8303.26	15881.1	12831.2	15614.7	15073.8	17984.2	8847.26	20600.9	19756.9	11780.1	16660.6	10038.6	19682.7
K01361	E3.4.21.96; lactocepin [EC:3.4.21.96]	17.5	15	17.67	5	10.5	5	3	0.11	11.83	29.84	32.34	38.83	23.05	10.27	27.08	32	42.16	51	15.61	36	29.17	12.5	29	9	18	56.5	10	44	21	12	10	26	28	32.44	40.11	15	17.68	18.33	36.49	55	162	42.56
K01372	BLMH, pepC; bleomycin hydrolase [EC:3.4.22.40]	680.67	798.66	591.5	577.33	310.87	2020.16	1660.53	1367.83	1315.83	1867.2	1750.79	1843.32	1443.17	1735.7	2071.25	1815	2488.33	2422.83	1640.25	653.16	1675.12	475	313	461.83	1115.27	1533.03	26.5	385	304.5	451.43	686.2	262.67	487.17	1576	961	670.5	957.66	905.83	756.83	706	393	514.9
K01387	colA; microbial collagenase [EC:3.4.24.3]	8.33	3.45	9	0	0	0.66	1.16	0	0.12	1.92	4	4.45	0.12	0.34	1	1.5	2.67	10.91	0.12	0	1.54	3.67	6.33	1.72	0	6	0	6	0.34	0	7	10.34	0	1	0	0	0	1.67	2.68	1	0	0.38
K01389	MME, CD10; neprilysin [EC:3.4.24.11]	0	0	1	0	0	0	0	0	0	0	0.5	0	0	0	2.33	0	0	0	0	0	0	0	0	0	0	0	0	0	0	0	0	0	0	0	0	0	1	0	0	0.67	0	0
K01392	THOP1; thimet oligopeptidase [EC:3.4.24.15]	7.33	4.66	8.99	7.66	1.33	12	20.34	19.66	12.33	6.67	16.66	10.67	14.99	15.67	15.67	12.67	25.99	12	16.67	18	27.67	16.33	3.33	3	23	11	0	7.67	6.33	13	5	2.67	13	23	27.65	12.67	14.99	15.66	8.99	46	22	17
K01399	lasB; pseudolysin [EC:3.4.24.26]	376	781.6	265.2	2244	2174	1344	725	638	541	688	787.4	679.2	344.2	722	709	682	904	765	472	359	477	314.6	354.8	3041	269	153	31.2	146	197	151	943	1026	611	312.5	98.25	116	416.4	583.2	485.2	129	338	301
K01400	nprE; bacillolysin [EC:3.4.24.28]	2	3	2	2.5	0	0.5	1	0.11	0	3	1	3	0.22	0	0.33	0.5	1	7	5.11	0	8	4	23	1	0	0	0	17	0	0	0	0.11	8	0.44	0.44	0	6.5	8	16	3	1.38	0.56
K01401	aur; aureolysin [EC:3.4.24.29]	3	6	3	3	16	3	76	50	37	9.75	1	8.75	1	1	0	5.25	2	3.25	2.25	5	1.25	7	0	3	19	22	9	32	48	22	12	13.11	47	6	7	5	1	3	2	3	0	0
K01406	prtC; serralysin [EC:3.4.24.40]	743.5	702.1	565.7	412	1414.5	623	237.5	257.5	206	466.5	461.56	594.7	340.2	710	697	429	484.5	547.5	444	222	307	333.6	274.3	528.5	962	1213.5	33.2	581.5	621	131.8	447	579	400.5	393.33	583.5	273	810.15	540.7	354.2	211	514	220.5
K01407	ptrA; protease III [EC:3.4.24.55]	0.93	1.05	1.14	3.67	3.79	26.51	49.5	39.67	30.33	5.9	1.5	3.7	12.62	3.23	4.8	6.34	4.96	3.64	34.37	8.83	16.4	2	0.43	1.5	8.46	0.38	0	6.83	0	3.91	0.33	1.17	4	1.17	1.14	2.5	3.98	7.27	0.83	18.57	1.83	17.46
K01408	IDE, ide; insulysin [EC:3.4.24.56]	7	3	7	0	0	0	1	1	0	5	5	6	12	45	18	5	6	7	18	77	40	8	6	12	0	1	0	0	1	0	0	1	9	0	12	2	10	3	5	19	44	115
K01409	KAE1, tsaD, QRI7; N6-L-threonylcarbamoyladenine synthase [EC:2.3.1.234]	15681.4	17174.5	16628.7	20548	16238.7	24623.6	22801.5	19527.5	16460.3	17482	14024.6	16853.8	11928.4	15501.2	17399.1	13692.7	16139.6	16761.6	17530.2	11098.6	17461.9	14552.4	12466.8	20305.7	16034.6	15387	858.6	8657.16	11052.9	7494.51	14628.1	11914.4	14609.1	12969.3	16368.7	7105.34	19198	17840.7	11071.7	16002.5	8687.96	17617.3
K01414	prlC; oligopeptidase A [EC:3.4.24.70]	2943.93	4305.43	2897.25	6406.42	6502.28	7836.09	6505.83	5356.41	4653.44	5303.99	4318.65	5278.14	2711.97	3785.24	3930.46	3978.17	5209.78	5509.88	4661.19	2943.26	3681.4	4781.01	3306.48	9053.3	4490.05	4750.04	197.53	2309.66	4381.17	1681.58	3447.91	4391.42	4619.58	2949.42	9050.38	1538.34	5413.52	4661.54	3294.19	3236.23	2232.99	2664.12
K01415	ECE; endothelin-converting enzyme [EC:3.4.24.71]	150.5	86.33	170.5	114.34	107	122	223	182.33	152.66	172	160	214.98	223.57	359.67	473.33	153.24	149.5	191.74	350.07	261.67	465.09	283.33	186.33	190.33	224	258	17	119	87	70.17	327	248	363	224.67	156.08	116	193.57	221	120	289	171.5	255.26
K01416	snpA; snapalysin [EC:3.4.24.77]	11	16	16	0	0	0	1	0	0	7	2	4	0	0	13	1	0	11	4	7	6	4	12	0	4	10	0	0	12	21	14	20	0	1	0	0	3.17	2	3	2	3	0
K01417	MEP; extracellular elastinolytic metalloproteinase [EC:3.4.24.-]	0	0	0	0	0	0	0	0	0	0	0	0	0	0	0	0	0	0	0	0	0	0	0	0	0	0	0	0	0	0	0	0	0	0	0.33	0	0	0	0	0	0	0
K01419	hslV, clpQ; ATP-dependent HslUV protease, peptidase subunit HslV [EC:3.4.25.2]	11350.7	13081.5	11754.9	14243.6	14220.4	17254.2	17845.2	15233.8	12694.6	11981.9	9624.72	11459.4	7303.92	9948.74	11273.2	8908.91	10721.2	10253	11531.9	7717.89	11449.4	10226.6	9295.15	17116.8	10339	10493.1	605.36	6513.49	8929.84	4948.74	8979.91	8906.7	10413.4	6794.22	11930.9	3658.67	13961.4	12818.6	8275.92	10018.7	5710.7	9055.68
K01420	fnr; CRP/FNR family transcriptional regulator, anaerobic regulatory protein	17651.4	19926.3	19003.8	20138.5	21779.2	25340.7	22867	19741.9	16335	20537.4	16344.5	19808.3	12099.4	14891.9	17014.8	16284.7	19458.8	19552.1	18350.1	10210	17280.1	16293.9	15707.7	23434.7	16407.9	15575	813.1	8994.82	12908.8	6552.58	12586.6	10200.2	13734.2	11189.3	15207.7	5509.67	21548.2	19870.6	14072.2	14762.9	8766.79	15975.9
K01421	yhgE; putative membrane protein	182.16	168.48	200.58	158.83	82.37	230.33	257.53	201.44	152.16	378.86	336.62	286.64	222.56	256.97	329.24	337.32	454.15	374.16	287.69	423.5	377.63	186.68	194.16	101.83	179.1	148.2	22	415.5	171.5	337.1	231.2	138.28	280.5	458.44	340.44	209.5	352.44	379.4	232.11	399.84	305.38	361.13
K01424	E3.5.1.1, ansA, ansB; L-asparaginase [EC:3.5.1.1]	10096.7	9858.81	10455	11657.5	7168.78	15430	14337.7	12186.3	10031.5	11932.9	10465.2	12137.9	8437.57	9093.16	10921	10458.2	12543.3	14077.8	12174.7	8158.36	12638.6	7646.98	8636.99	12031.7	10576.1	11705.4	551.13	5301.31	5043.79	5274.89	8786.53	6267.89	7635	12701.8	8289.94	6988.58	13106.6	13409.5	7925.39	10827.2	5993.79	8969.53
K01425	glsA, GLS; glutaminase [EC:3.5.1.2]	1537.67	1773.5	1715.26	3995.22	2790.07	3396.13	2671.34	2281.14	1917.7	2270.14	2746.1	2656.93	1584.74	1900.8	2319.21	2200.76	3333.14	3480.15	2033.59	1173.26	1968.33	1393.15	1061.73	3715.26	2436.87	3238.01	95.65	1691.83	1123.79	842.66	1848.17	1606.22	1600.99	1987.01	1233.54	683.25	1673.89	2171.88	1422.41	1299.68	872.14	1416.3
K01426	E3.5.1.4, amiE; amidase [EC:3.5.1.4]	12668.3	14276	11850.4	19676.9	10912.4	23427.8	18752.4	16353.1	13543.9	12245.9	11867.8	11963.2	10809.4	12718.1	14649.8	11158.7	14216.4	14177.8	14658.5	10455.2	15980.2	8392.49	10257.6	13503.3	15674.7	19699.3	580.77	6749.14	7335.33	5527.87	11155.9	9518.08	10318.1	14093	10793.3	9342.83	14154.7	15497.2	9062.75	17913.9	7124.82	22524.3
K01427	URE; urease [EC:3.5.1.5]	0	0.33	0	0	0	0	0	0	0	0	0	0	0	0	0	0	0	0	0	0.33	0	0	0	0	0	0	0	0	0	0	0	0	0	0	0	0	0	0	0	0	0	0
K01428	ureC; urease subunit alpha [EC:3.5.1.5]	2773.33	2803.24	2775.88	3081.15	2492.5	5545.66	4034.91	3499.48	2843.34	2659.82	2948.03	2492.65	2789.44	2468.33	2881.24	2464.85	3331.01	2913.9	4393.15	2744.26	3427.95	1746.69	2310.8	2606.25	3272.02	4601.91	172.02	2291.49	3390.33	1562.4	2569.74	1751.52	2289.08	2753.73	2631.07	1348	4101.9	3919	2395.02	2821.81	2182.54	2402.99
K01429	ureB; urease subunit beta [EC:3.5.1.5]	2808.5	2884.5	2850.39	3533.99	2480.17	5783.66	4305.07	3709.82	3017.01	2608.15	2900.71	2994.48	2925.45	2577.99	3112.9	2372.68	3288.35	3788.4	4702.48	2985.93	3818.28	1755.36	2347.47	2606.25	3175.77	4624.91	172.02	2172.82	3439	1443.8	2620.74	1741.85	2071.08	3300.73	2656.08	1579.33	3899.91	3743.34	2335.53	3087.81	2308.54	2654.99
K01430	ureA; urease subunit gamma [EC:3.5.1.5]	2966.5	3080.83	2963.39	3609.99	2543.17	5883.66	4502.07	3903.82	3193.01	2886.15	3083.04	3344.48	3076.45	2957.99	3408.9	2532.68	3495.35	4132.4	4773.48	3033.26	3912.28	2014.36	2479.47	3084.25	3562.77	5214.91	191.02	2357.82	3672	1640.8	3102.74	2249.85	2471.08	3499.73	2750.08	2372.33	3986.91	3862.34	2429.53	3227.81	2409.54	3123.99
K01432	AFMID; arylformamidase [EC:3.5.1.9]	344.83	422.17	284.35	298.84	96.16	541	556	498.75	408.42	337.25	358.59	361.67	298.09	293.84	392.24	367.84	432	422	455.01	232.68	697.75	175.42	296.43	173.51	278.76	287.24	11.66	138.32	175.84	246.5	247.59	251.25	339.92	149.25	242.75	177.5	586	556.16	320.67	428.41	52	174.16
K01433	purU; formyltetrahydrofolate deformylase [EC:3.5.1.10]	6825.34	7011.27	6500.76	6326	3654.54	10198.8	8880.58	7528.82	6387.78	8695.82	7371.54	8468.01	6825.67	7173.07	8630.86	7931.98	8690.07	10341.8	10038.4	6936.1	10027.6	6238.68	6695.53	7407.22	8730.81	10360.5	475.71	4144.48	5362.17	4504.58	6556.66	4971.78	6011.91	9668.57	7683.12	6609.83	10586.4	9634.53	5998.17	8364.14	4564.7	6358.04
K01434	E3.5.1.11; penicillin amidase [EC:3.5.1.11]	4518.31	5641.84	4451.52	6406.14	5044.17	9247.49	7352.84	6271.92	5269.99	5767.6	5685.27	5450.3	4379.38	5548.67	6562.32	5351.45	6475.19	5708.2	7051.23	5792	7868.24	3416.03	3600.73	6287.68	3508	3859.99	226.72	3407.83	3262.33	2596.33	3596.16	3636.51	3982.5	4098.92	3834.17	2294	7458.61	7149.36	4557.05	6764.82	4023.66	5460.11
K01436	K01436; amidohydrolase [EC:3.5.1.-]	4261.8	3454.07	4870.85	6020.01	3351.33	6255.73	8654.08	7316.28	5950.5	4765.17	3773.92	4868.72	2905.24	2954.87	3550.58	3906.69	4437.06	5066.53	4523.38	2785.84	4251.73	3500.61	3510.57	4661.09	2484.16	2175.93	174.74	2148.5	1918.74	1715	1875.5	1146.83	1759.83	2661.53	1536.02	1202	4740.37	4459.49	2328.5	3322.59	1981.02	3081.68
K01437	ASPA, aspA; aspartoacylase [EC:3.5.1.15]	0	1	0.5	0	0	0	1	0	0.5	9.5	14.5	48.5	6	1.5	1.5	15.5	8	75	26	2	7.5	0.5	0	0	0	5	0	12.5	0	8	20	20	13.83	16.66	2	0	9.5	3.5	3.5	0	0	1
K01438	argE; acetylornithine deacetylase [EC:3.5.1.16]	17467.6	16459.3	17150.6	17373	14849.4	25184.7	19720.8	17183.9	14412.4	19696.2	17507.9	19086.6	15443.3	17990.4	20371.3	17779.9	20877.2	22413.1	20287.9	13713.1	20483.2	13313.3	15408.6	19323.5	17681.5	18742.9	1036.15	10535	11936.5	9721.14	13750.8	11561	13565.5	20742.5	23070.9	13025.6	21996.2	20121.2	14125.8	17684.4	9548.29	17181.6
K01439	dapE; succinyl-diaminopimelate desuccinylase [EC:3.5.1.18]	14285.5	13787.3	14762.6	18320.6	13722.5	22758.9	22877.5	19725.7	16398.4	13284.1	11319.7	12660.8	10884.4	13103.3	14848.7	10738.1	12755.8	12610.5	14616.6	9723.59	15630.4	11389.1	10978.1	17469.1	13771.3	15107.6	848.76	7913.15	10803.2	6904.91	10489.6	9898.7	11479.4	12945.9	18053.7	8562.33	15197.2	13717.2	8987.84	14628.3	6702.46	15095
K01440	PNC1; nicotinamidase [EC:3.5.1.19]	0	0	0	0	0	0	0	0	0	0	0	0	0	0	2	0	0	0	0	0	0	0	0	0	0	0	0	0	0	0	0	0	0	0	0	0	0	0	0	6	0	0
K01442	E3.5.1.24; choloylglycine hydrolase [EC:3.5.1.24]	419.5	860.33	350.17	2484	2311.17	2074.33	920.17	822.17	713.67	763.58	762.17	724.08	617.5	793.34	1019.83	661.58	864.99	763.08	938.25	504.5	1162.59	589.17	315	2926.5	668	685	47.83	372	421	382.3	1212.67	1251.61	859	662.5	604.33	337.5	453.49	523.5	432	435.33	288.38	417.5
K01443	nagA, AMDHD2; N-acetylglucosamine-6-phosphate deacetylase [EC:3.5.1.25]	5065.46	4106.62	5525.02	5488.71	4541.11	6976.04	7537.12	6408.89	5209.95	4650.7	3417.52	5094.84	2586.89	3436.25	3691.75	3822.54	3766.19	5174.84	3465.81	2794.25	3777.32	3819.07	3743.73	5010.93	3359.22	3693.8	206.98	2649.16	2509.79	1939.06	2441.2	1595.12	2327.49	3173.68	2050.91	2298.25	4946.07	4678.2	2613.73	4042.95	2720.09	3485.16
K01444	AGA, aspG; N4-(beta-N-acetylglucosaminyl)-L-asparaginase [EC:3.5.1.26]	937.08	1441.66	935.75	1764.83	1045	3078.66	2164.08	1767.41	1540.16	2467.67	2812.49	1954.17	1147.58	1031.67	1372.41	2454.08	3562.08	2435.33	1659.58	1301	2105.67	1143.24	863.5	1803.5	1565.16	1856.92	58.33	1073.5	582.5	828	1330	804.17	1105.17	1083.67	787.16	613.5	2050.32	2456.58	1303.33	1333.5	960	1757.67
K01446	PGRP; peptidoglycan recognition protein	0.17	6	2	2	16	2	73	46	36	4.33	0.67	6	0	3	3	0.17	0.5	0	0	12	1.37	7.17	0	3	19	22	9	11	48	22	12	13	47	0	0	0	0.67	0	1	6	54.5	0
K01447	xlyAB; N-acetylmuramoyl-L-alanine amidase [EC:3.5.1.28]	1618.8	1458.44	1519.21	2126.55	2059.5	2774.62	2563.42	2251.96	1811.12	1899.19	2244.08	1811.47	1286.98	1650.72	2049.63	1892.46	2782.47	2115.87	1854.32	867.25	1919.58	816.23	823.3	1353.21	1571.33	2610.46	74.62	1534.17	1250.95	648.05	805	1010.5	1197.33	1211.55	1342.24	759.42	1953.19	1531.34	1175.74	1506.38	661.78	838.5
K01448	amiABC; N-acetylmuramoyl-L-alanine amidase [EC:3.5.1.28]	17075.7	18614.8	18753.6	23863.5	18510.5	27716.5	24340.8	20938.7	17470.4	20319.7	16541.4	20991.8	12774	16796.3	19256.7	15771.5	19369	22003.8	18936.5	11605.5	18628.4	16372.2	14082.4	22083.7	17393.4	16758	836.71	9195.83	11525.5	7411.23	12576.8	11934.3	14125.7	15095.2	16321.4	7682.51	20785	19496.8	12141.8	16064.2	9863.74	17964.7
K01449	cwlJ, sleB; N-acetylmuramoyl-L-alanine amidase [EC:3.5.1.28]	2140.77	2405.98	3208.8	5519.01	5045	6164.24	5463.75	4933.38	4010.51	4252.76	2107.91	3680.99	1464.36	2607.46	2853.59	3275.24	2291.14	3678.16	1430.1	1423.4	2480.24	4645.77	4608.99	3863.26	1816	1201.76	105.74	949	1268.74	1082.1	1558.5	738.83	1775.5	1680.2	767.11	510.5	5506.06	3628.78	1492.13	2240.26	1054.4	1192.3
K01451	hipO; hippurate hydrolase [EC:3.5.1.32]	5082.2	5253.54	4595.82	5264.05	5947.14	8380.62	6647.5	5824.78	4672.09	3653.84	4138.82	3912.1	3606.65	4894.39	5375.26	3442.11	4616.1	3924.28	4500.91	2741.1	4475.05	2968.92	2706.68	5046.32	6619.78	9982.59	278.34	4116.98	3978.8	2248.48	3048.76	4618.09	3362.92	3257.99	10901.2	2146.75	5858.66	4795.79	3394.85	3423.89	1820.38	2283.32
K01452	E3.5.1.41; chitin deacetylase [EC:3.5.1.41]	8	7	7	185	1	467	41	42	34	22	15.66	17	52.5	12.34	39	19.66	22	27	9.5	80	25	3	17	3	2	0	12	111	14	90	46	15	35.33	63	20	63	40.83	19	9	7	171	10
K01453	nylB; 6-aminohexanoate-oligomer exohydrolase [EC:3.5.1.46]	961.92	982.17	852	484	1516	732.25	241.75	240.25	173	518	603.42	647.41	459.91	841.83	859.16	502	702.92	670.58	607.33	263.67	625.08	340.5	412.5	549.25	1303.5	1938.33	36	758	583.5	149.5	388.5	865	234	555	305	279	1059.17	667.42	459.83	417.91	78.16	198.5
K01455	E3.5.1.49; formamidase [EC:3.5.1.49]	182.92	236.58	172.11	218.67	110.67	1064.01	258.33	212.83	185.17	381.68	302.79	357.15	135.83	96.83	274.5	391.32	393.31	483	340.99	159.84	543.67	394.5	141.42	141	1366.34	2346.17	7.99	259.33	125.33	236.1	159.5	182.66	154.82	271.33	130.5	34.16	211.4	232.65	135.11	262.98	41.66	242.5
K01457	atzF; allophanate hydrolase [EC:3.5.1.54]	695.5	757.92	714.66	1299.17	423.33	1637.34	1944.83	1699.5	1332.92	509.92	572.83	564.9	431.45	671.5	692.49	439.62	607.42	498.95	486.36	319.51	570.96	656.5	371.34	738	1734.84	2389.16	22.83	216.33	374	260.1	167.67	283	209.83	949.5	628.17	411.5	766.95	597.75	507.92	360.66	407.66	263.79
K01458	hutG; N-formylglutamate deformylase [EC:3.5.1.68]	828.84	772.66	676.84	1145	1618	1814.32	1299.33	1167.5	881.5	455.5	519.83	568.84	630.16	930.67	997.84	473	579.83	575.83	593.34	245	461.33	232	335.34	716.51	332.34	284.83	37	763.16	660.51	243.33	248.5	480.17	237.01	599	525.75	314	841.67	603.5	403.84	394.5	442	228
K01459	E3.5.1.77; N-carbamoyl-D-amino-acid hydrolase [EC:3.5.1.77]	130	109	133	68	48	167	32	49	42	54	43.66	65	141	350	372	30	30	41	35	38	66	168	60	129	1784	2566	18	88	28	67	114	175	173	359	221	188	22	22	24	0	0	13
K01460	gsp; glutathionylspermidine amidase/synthetase [EC:3.5.1.78 6.3.1.8]	0.26	1.08	2.14	0	0.12	1.67	0	0	0	0.14	1.5	0.91	0.17	0.4	4.8	0.84	2.32	0.22	0	0	0.1	0	1.6	0	2.62	0.38	0	0	0	3.91	0	0.5	3	0.5	0.3	0	3.48	3.43	1.33	0.4	0	0
K01461	E3.5.1.82; N-acyl-D-glutamate deacylase [EC:3.5.1.82]	6	1	5	0	3	0	0	0	0	4	1.5	0.5	0	28	0	1	0	1.5	0	11	0	35	3	21	552	800	3	34.5	9	10	0	0	6	0	0	0	7	3	5	0	0	0
K01462	PDF, def; peptide deformylase [EC:3.5.1.88]	19877	22375.6	20515.3	28769.3	25117	33517.3	31009.6	26529.8	22352.6	22580.8	18641.4	22818.3	14799.3	20046.5	22275.8	17576.1	21418.4	22843.4	21431.5	13536.7	21028.9	18864	15257.4	30183.7	21091.2	21803.8	1008.68	11346.3	14410.8	8930.66	17761.3	16725.7	19415.6	16166.4	19397.2	10313.4	23273	22083.8	14456.2	18172.3	10710.5	20165.5
K01464	DPYS, dht, hydA; dihydropyrimidinase [EC:3.5.2.2]	3103.82	3054.86	3290.75	3225.79	2577.58	5286.79	4318.02	3742.65	3176.34	3536.84	2874.33	3463.16	2967.31	3604.61	3723.09	3406.18	3295.9	4137.77	4666.7	2166.84	3180.45	2509.73	1916.12	2938.38	2811.22	3109	126.64	1689.99	1444.95	1020.83	1380.08	1484.75	2116.58	2906.14	1493.37	1108.08	4450.11	3361.5	2235.76	2244.35	1553.88	1749.79
K01465	URA4, pyrC; dihydroorotase [EC:3.5.2.3]	23825.5	26499.4	24448.9	29628.1	26671.6	42573.4	36634.4	31089.8	26317.9	29167.2	24659.6	28804.2	19293.5	24644.8	27553.2	24413.2	29065.5	31384.7	27500	18968.3	28372	22783.6	20400.8	32852.1	28058.4	29108.4	1469.52	16327.8	19556	13095.6	21078.4	18815.7	23966.8	23312.7	31754.1	13567.7	32742.8	31632	19745.7	25472.5	14553.4	25536.2
K01466	allB; allantoinase [EC:3.5.2.5]	243.02	276.81	199.12	1111.04	182.25	766.78	1137.84	1033.72	859.13	549.25	445.7	609	327.86	617.79	553.93	422.6	533.5	698.26	384.62	592	365.27	403.79	242.08	564.8	517.75	747.63	24.45	336.17	368.12	313.45	566.67	622.95	605.75	930.96	282.04	835.42	256.39	311.58	222.48	777.45	229.26	710.54
K01467	ampC; beta-lactamase class C [EC:3.5.2.6]	72	85.94	82.2	70.5	111.32	169.33	141.69	130.83	110.5	373.62	343.11	267.84	158.66	31.44	189.71	360.89	426.02	353.63	339.03	118.84	358.43	108.6	39.14	141.5	490.06	554.74	11.53	86.33	123.17	122.64	196.37	141.34	134.67	175	537.55	183	113.09	148.13	91.37	137.73	82	139.69
K01468	hutI, AMDHD1; imidazolonepropionase [EC:3.5.2.7]	3774.65	4865.08	4009.36	6878.88	4938.96	7559.2	6087	5162.58	4425.49	7863.91	6626.89	7027.47	5122.42	6147.22	7159.95	7393.65	8053.48	8429.04	8105.98	5422.93	7829.23	4134.65	3591.7	7713.35	4916.64	5466.66	259.14	2929.15	3125.29	2711.63	6886.66	4435.45	5642.84	4842.87	4300.73	2904.08	7959.2	6726.41	4087.3	6059.29	3728.42	6083.99
K01469	OPLAH, OXP1, oplAH; 5-oxoprolinase (ATP-hydrolysing) [EC:3.5.2.9]	1076.67	964	1107.01	1074	657.83	1267.33	1162	975.5	819.83	1366.67	1168.17	1936.5	1314.33	1150.5	1731	1199.33	1280.82	2424	1898.34	1006	2139.67	1305.17	952.33	954.34	1221.83	1491.5	38	951.83	716.67	484	734.5	772.83	1337.16	1044.33	1043.5	582.5	2727.17	1784.33	990.33	1903	724.5	1257.83
K01470	E3.5.2.10; creatinine amidohydrolase [EC:3.5.2.10]	12345.2	11139.9	12623	11417.3	7051.71	17507	16418.2	14106.1	11953.9	16340.2	12843.7	15649.7	13372.9	13685.1	16651.1	15065.6	14996.2	19356.5	19813.4	14845.8	21078.6	11794	12560.4	12335	15356.5	15462.3	916.44	7128.14	6959.65	8825.4	11245	8317.49	11686.5	17725.4	16362.5	11945	21582.3	17049.5	11246.1	20173.5	8703.99	14491.9
K01471	nylA; 6-aminohexanoate-cyclic-dimer hydrolase [EC:3.5.2.12]	50	41	22	9	16	17	10	5	4	6	6.66	5	7	6	19	8	6	4	7	42	5	38	13	18	560	819	3	29	8	3	29	6	9	1	22	1	42	23	13	0	19	22
K01473	hyuA; N-methylhydantoinase A [EC:3.5.2.14]	6697.16	6136.31	7016.74	11060.3	5330.93	11505.6	10149.5	8855.75	7431.17	8867.51	7083.14	8062.42	8852.82	10567.5	11744.6	8109.23	8259.5	9869	11022.6	7000	11450.2	6077.67	6380.81	6805.77	10658.6	12281.4	504.98	4459.48	4982.01	4785	7021.33	5556.83	6712.08	12577.9	9374.08	7534.99	10427.3	9673.14	5752.33	10128.6	4656.33	14442.9
K01474	hyuB; N-methylhydantoinase B [EC:3.5.2.14]	6267.66	5612.31	6463.24	10594.3	5173.93	10710.6	9054.51	7940.25	6667.17	8446.01	6497.14	7722.42	8248.82	10077.5	11120.6	7800.23	7544.5	9496.5	10146.6	6064	10645.2	5801.67	5653.81	6374.77	9440.6	10873.4	466.98	3888.48	4593.01	4365	5646.33	5130.83	5956.41	11808.7	8657.08	7282.99	9836.31	8756.14	5170.83	9182.65	4133.33	13357.9
K01476	E3.5.3.1, rocF, arg; arginase [EC:3.5.3.1]	5273.86	4927.67	5131.46	4914.21	3781.23	6468.28	6090.84	5384.61	4304.14	5960.25	4888.15	5719.07	4131.83	5114.64	5704.45	5643.63	5788.33	6783.5	5683.38	4333.75	5982.12	4198.63	4610.48	5465.46	5951.56	7007.16	348.76	2910.65	3273.45	2804.26	2692.66	2754.27	3760.92	5758.87	5497.43	4335.4	8097.92	6659.85	4468.93	5695.02	3080.18	3777.27
K01477	alc, ALLC; allantoicase [EC:3.5.3.4]	229.33	221.68	188.52	7.16	32.33	119.33	12.5	7.66	13.33	69.67	75.06	91.2	76.77	82.84	30.67	39.67	85.16	90.83	111.08	158.25	74.5	32.93	63.63	21.17	29.25	61	4.2	84.17	82.5	65.5	41.5	23.84	38	67	44.49	28.67	92.98	74.86	88.36	65	61	148.33
K01478	arcA; arginine deiminase [EC:3.5.3.6]	1256.9	1799.48	1279.59	2356.05	1045.83	4764.29	3243	2664.76	2429.62	2377.56	2182.62	2340.48	2012.49	2171.65	2390.62	2242.21	2712.61	2760.83	2131.54	1593.26	2464	1214.74	1017.21	2204.31	1646	2098.37	105.65	1060.83	832.62	1023.75	1658.67	1385	1698.16	2673.38	1218.33	1711.25	1850.3	2370.52	1334.07	1888.37	1182.71	2029.7
K01479	hutG; formiminoglutamase [EC:3.5.3.8]	1651.99	2600.7	1605.18	4332.67	3530.96	4523.17	3463.08	2955.24	2517.45	3379.98	3889.96	3018	2244.1	2705.17	3298.06	3168.56	4728.24	3518.29	3459.27	2736.18	3936.64	1475.79	1345.25	4717.21	1354.13	1390.78	140.22	1712.49	1436.83	1169.38	2885.33	3006.94	2522.33	2735.82	2059.49	1171.16	3245.1	3051.04	2200.56	2761.82	1816.38	2453.54
K01480	speB; agmatinase [EC:3.5.3.11]	15398.2	13102.9	15857.7	15483.1	10424.3	19911.5	23442	20298.3	16585.3	16224.5	14114.5	16051.8	11618.1	13331.6	15566.7	14544.9	16719.2	18741.8	17812.3	12215.1	17805	10344.5	12364.5	12742.2	12424.7	13852	816.25	9303.32	8373.27	7640.36	10567.3	8261.94	10525.1	15242.3	11913.8	9214.57	19725.2	17261	11367.1	17530.6	8852.09	13636.7
K01481	E3.5.3.15; protein-arginine deiminase [EC:3.5.3.15]	1.33	0.66	1.99	5.66	1.33	3	2.34	6.66	0.33	0.67	3.66	0.67	12.99	6.67	5.67	1.34	2.66	4	34.67	31	15.67	1.33	1.33	1	0	1	0	0.67	3.33	2	0	0.67	0	0	2.66	1.67	1.99	0.66	0.99	10	33	7
K01482	DDAH, ddaH; dimethylargininase [EC:3.5.3.18]	62.45	85.55	37.2	13	19	26	33.5	20	13	227	321.85	195.53	171.2	50	175	220.33	363.33	227	201	65	285	34.27	81.13	65	29.5	16	5.2	126	32	125	38	57	129.5	35.5	350.25	63	139.9	296.2	178.32	152	65	85
K01483	allA; ureidoglycolate lyase [EC:4.3.2.3]	1613.78	1536.22	1426.69	1919.83	1820.66	3429.67	1966.5	1736.91	1361	973.75	1108.26	1059.2	1248.36	1281.91	1431.38	953.27	1216.1	1072.68	1601.58	850.59	1274.35	565.18	694.72	1139.17	662.17	1319.58	57.53	903	942	406.83	562.92	719.09	497.58	829.08	1269.54	550.17	1554.87	1250.37	985.9	738.98	635	529.16
K01484	astB; succinylarginine dihydrolase [EC:3.5.3.23]	460.73	780.03	323.98	2591.67	2245.95	2521.34	1241.33	1071.75	935.17	763.14	890.65	766.39	760.4	1011.9	1140.71	692.34	971.3	789.55	1184.53	600.51	898.81	435.85	468.25	3001	476.54	483.79	38.03	273.33	318.5	303.41	1356.92	1312.25	929.25	493.25	161.38	127	550.05	648.38	500.11	363.14	414.83	583.29
K01485	codA; cytosine deaminase [EC:3.5.4.1]	2087.5	2094.19	1936.28	2589.17	2343.28	3550.25	2601.83	2273.75	1885.92	2607.92	1966.22	3194.86	2332.78	3100.07	3651.63	2596.84	2280.07	4440.68	3311.41	1806.51	3230.1	1349.6	1387.02	2623.92	2850.54	3427.71	153.03	2776.16	2451.67	1677.38	1883.92	1928.58	1961.58	3023.58	9383.8	1452.5	3598.8	2886.7	1434.44	2060.39	793.16	2104.74
K01486	ade; adenine deaminase [EC:3.5.4.2]	3327.37	2990.87	3526.18	4382.35	3266.08	5424.74	4640.35	4011.56	3380.79	3627.17	3120.79	3525.85	3313.97	4503.78	5254.89	3048.09	3597.91	3452.43	4859.87	2450.31	4807.83	2766.01	2224.42	2668.59	3470.62	4263.64	203.57	2190.5	2094.24	1850.08	4793.17	2051.22	2816.17	4208.67	3254.85	1502.5	5973.79	4379.58	2718.9	2934.16	1371.18	2670.19
K01487	E3.5.4.3, guaD; guanine deaminase [EC:3.5.4.3]	2312.49	2176.15	2223.16	2782.16	2204.79	4414.25	2952.58	2586.98	2096.34	1714.76	1993.65	2315.18	1968.65	1734.9	2198.37	1617.54	2230.37	2860.88	2788.9	1626.76	2363.45	1118.12	1368.26	1657.25	1797.72	2654.79	93.22	1508.16	1480.33	1004.88	1304.08	1365.03	1419.08	1831.23	2090.54	1015.16	2385.86	1898.14	1509.77	1693.88	1121.66	1297.75
K01488	add, ADA; adenosine deaminase [EC:3.5.4.4]	4063.98	5137.09	3806.72	8379	6782.77	9079	6138.88	5243.4	4473.9	3867.26	4205.36	4954.83	3168.99	4104.11	4146.45	3534.43	4871.71	6103.55	4427.71	3332.34	3934.47	2648.86	3130.47	8359.31	2804.38	3842.82	189.53	2493.83	2255.67	2029.34	6001.45	3693.26	3858.91	3043.61	3270.37	2562.17	4376.12	5093.95	2928.87	3088.9	2666.16	3985.02
K01489	cdd, CDA; cytidine deaminase [EC:3.5.4.5]	11576.6	10875	12438.4	13934.8	10430.5	17464.7	17286	15017.4	12207.9	13844.2	11582	12808.2	9956.17	11073.4	12691.5	12309.3	13727.9	14341.5	14735.2	9357.97	13906.2	9675.87	10243.9	14003.8	10950.4	11618.9	663.1	6346.49	6818.45	6296.26	10682.3	6543.04	9130	11531.7	10448.9	7334.41	14264.8	13527.1	8514.08	13383.5	7622.42	11604.6
K01491	folD; methylenetetrahydrofolate dehydrogenase (NADP+) / methenyltetrahydrofolate cyclohydrolase [EC:1.5.1.5 3.5.4.9]	18438.7	19759.7	19104.2	23268.7	18216.9	29608.3	27391.9	23500.8	19714.9	21605.5	17655.2	20943.3	15628.2	19198.5	21714.2	17778.9	20592.3	22200.4	22542.2	14781.6	22876.6	16697.6	15601.4	23334.8	20252.4	20036	1102.29	10782.8	13084.8	9761.96	17355.6	13721.2	17544.5	18243.2	21240.1	10792.7	24046.7	22394.2	13954.8	21224.9	11155.9	21725.5
K01492	purNH; phosphoribosylglycinamide/phosphoribosylaminoimidazolecarboxamide formyltransferase [EC:2.1.2.2 2.1.2.3]	0	0	0	0	0	0	0	0	0	0	0	0	0	0	0	0	0	0	0	0	0	0	0	0	0	0	0	0	0	0	0	0	0	1	0	0	0	0	0	0	0	0
K01493	comEB; dCMP deaminase [EC:3.5.4.12]	6726.66	5216.17	7666.44	7641.79	6024.99	7637.28	7636.8	6756.76	5444.19	6912.54	5303.44	6859.27	4614.04	6302.1	7311.21	5014.92	6284.4	6400.41	6474.23	3556.39	6956.68	5398.46	5146.32	6002.92	5321.02	3949.16	251.62	2984.67	3233.45	2341.55	3924.7	3288.95	3776.17	5696.85	2666.43	2516.42	7136.78	6322.43	4418.13	5877.88	3293.09	8901.91
K01494	dcd; dCTP deaminase [EC:3.5.4.13]	11428.5	12968.9	11770.5	16207.6	12120.4	22560.7	20470.7	17437.4	14863.8	15572.3	12346.5	14621.2	11338.5	13453.9	15017	13334.5	14076.7	16200.5	16472.3	11986.2	16342.9	13009.9	11137.8	18103.5	15780.9	16241.4	840.68	8049.65	9917.67	7704.71	13374.7	9932.25	13343	13078.5	18874.7	8412.66	18785.7	15678.7	9585.87	15677.5	7686.32	12147.9
K01495	GCH1, folE; GTP cyclohydrolase IA [EC:3.5.4.16]	11370.7	12566.8	11975.2	15687.7	9446.11	17167	16786.4	14196.4	12051.4	13868	11867.1	12918.6	9055.98	10921.6	12254	11336.6	14153.4	13557.3	13248.5	8746.81	13174.2	10662.7	8435.93	14377.4	13418.3	12863.7	637.17	6832.99	8691.12	6007.93	11928.1	9098.53	12359.4	10004.3	14361.4	5403.25	13622.8	13639.6	7756.61	12144.9	7028.08	15147.4
K01496	hisI; phosphoribosyl-AMP cyclohydrolase [EC:3.5.4.19]	10617.1	11573.8	10646.3	8382.66	10301.6	16056.2	11932.1	10336.2	8692.5	12155.5	9843.59	11951.6	8977.03	11823	13044.1	9662.72	11225.8	12152.5	12980.6	8807.68	13345.3	10899.7	9579.88	13036.3	12966.4	13666.9	741.68	6783.32	8456	6216.28	9521.61	9310.08	11723.2	10514.5	15833.2	7429.66	15374.5	13201	8941.36	12451.5	6288.32	9808.65
K01497	ribA, RIB1; GTP cyclohydrolase II [EC:3.5.4.25]	1817.16	1840.77	1740.4	2548.74	1957.94	4858.09	2852.25	2498.93	2022.53	1828.82	1786.64	1716.47	1639.36	1569.75	2083.2	1633.77	2044.03	1741.79	2689.81	1217.35	2435.23	1176.6	1287.81	1571.64	1009.63	1637.28	70.86	1251	1139	763.91	881.75	1078.76	1101.91	1147.19	1471.98	825.01	3566.02	2270.78	1667.38	1428.89	1062.16	774.18
K01499	mch; methenyltetrahydromethanopterin cyclohydrolase [EC:3.5.4.27]	4711.49	4239.19	4754.64	3485.16	4153.93	6670.83	5943.5	5142.62	4296.59	5705.67	4701.65	5716.92	4741.92	4992.32	5714.41	5404.4	5641.21	7108.58	6612.66	4950.58	6848.02	4329.99	5071.49	4023.25	6030.92	5832.25	339.15	2584.66	2507.83	3132.8	3943.83	2698	4160.08	6324.4	5579.24	4307.49	6672.39	6462.97	4466.42	7485.32	3339.33	5602.76
K01501	E3.5.5.1; nitrilase [EC:3.5.5.1]	2147.07	3163.01	2143.35	3752.57	5760.76	5731.74	2614.24	2199.99	1941.25	3095.92	2387.38	3002.93	1359.39	2687.83	2557.4	1961.6	2769.05	2550.11	2009.87	1460.34	1770.31	3709.19	2322.78	7836.34	3346.68	3154.07	160.19	1848.49	3837.17	1159.5	2631.32	3964.33	4226.75	1411.57	8245.91	835.83	3431.09	2745.93	2401.53	1428.9	1421.83	1297.63
K01502	E3.5.5.7; aliphatic nitrilase [EC:3.5.5.7]	102.83	51	85.17	35.67	28.33	93.67	63	48.5	41.67	15	36	19	20.34	3.17	6.66	16.67	30.34	21.5	49	19.34	26	48.5	20.84	17	640.17	819.33	6.33	19.33	9	37.3	1.17	1.5	21	13.5	7.25	0.5	25.5	11.33	17.84	10.5	5	6.83
K01505	E3.5.99.7; 1-aminocyclopropane-1-carboxylate deaminase [EC:3.5.99.7]	239.41	386.11	214.28	315.17	221.83	626.17	576.07	461.08	390.99	918.25	1168.9	727.93	438.73	226.35	384.73	899.86	1646.82	956.53	819.52	354.01	758.71	132.35	161.63	264.17	726.34	1034.74	29.03	323.83	138.67	274.67	240.83	321.5	218.49	418.5	298	91.17	500.84	529.78	414.03	464.17	212	329.37
K01507	ppa; inorganic pyrophosphatase [EC:3.6.1.1]	11273	13848.1	11062.1	12974.8	11611.2	20163.7	17384	14692.5	12614	15359.6	13373.7	14797	10627.6	12304.7	13983.5	13451.9	16010.2	17035.8	15821.2	11158.7	15720.9	11347.8	10899.3	16655.4	14211.9	15312.5	790.18	7338.32	9119.33	7239.38	13087.7	9750.75	13943.3	12617.3	17958.3	8021.33	16440.2	16316.3	10219.6	16040.5	8091.15	14138.3
K01510	ENTPD1_3_8, CD39; apyrase [EC:3.6.1.5]	34	55	11	1	6	1	3	1	1	13	20	17	2	1	0	11	24	11	8	30	2	1	13	2	13	6	4	0	1	0	5	0	6	0.5	0	1	20	18	24	0	40	4
K01512	acyP; acylphosphatase [EC:3.6.1.7]	16808.4	17850.1	17611.1	20070.3	15999.4	24499.6	24176.8	20701.7	17504.8	19117.5	14534.9	18523.1	13622.8	16791.9	18763.9	15277.7	16462.4	19210	19813.8	13473.2	20034	15840	14831.6	21833	18873.1	17068.9	1055.68	9114.32	11881	9129.14	16550.4	12815.2	16457.5	15611.7	19145.4	9500.83	21885.2	20367.3	12377.8	19092.6	9795.2	20041.9
K01514	PRUNE, PPX1; exopolyphosphatase [EC:3.6.1.11]	0	0	0	0	0	0	0	0	0	9	13	46	5	0	0	15	8	74	24	0	4	0	0	0	0	0	0	0	0	0	0	15	5	0	0	0	5	3	3	0	0	0
K01515	nudF; ADP-ribose pyrophosphatase [EC:3.6.1.13]	19903.2	20424.3	20838	22961	17448.1	30369.6	27920.4	23885.6	20215	23064.5	17602	22273.9	17098.4	20814.1	23174.2	19035.1	20124.4	24125.1	23962.9	16855.6	24030.4	19046.4	18548	24018.1	22717.7	20968.4	1278.62	10414.5	13456.5	11345	18321.8	13864	18857.1	21371.4	24185.7	13435.6	25580	23991.5	15004.9	24021.9	12208.7	23446
K01518	NUDT2; bis(5'-nucleosidyl)-tetraphosphatase [EC:3.6.1.17]	0	0	0	0	0	1	0	1	0	0	0	0	1	0	0	0	0	0	1	2	0	0	0	0	0	0	0	0	0	0	0	0	0	0	0	0	0	0	0	0	0	2
K01520	dut, DUT; dUTP pyrophosphatase [EC:3.6.1.23]	17301.2	17959.5	17916.1	20686.9	17307	27821.8	24966.5	21438.7	18016.2	19654.3	16194.6	18828.8	13722.7	17448.4	19476.7	15890	18814.8	19282.4	19199.4	12784.6	19722.6	15102.4	14473.1	21727.7	17773.8	17588.9	1022.97	9806.82	12155.5	9051.93	15890.8	12949.7	16208	16832.6	20265	10207.9	21417	20375.6	13056.5	18545.4	9674.58	19660.3
K01521	cdh; CDP-diacylglycerol pyrophosphatase [EC:3.6.1.26]	4.6	9.88	7.81	6	0.12	20.33	15.33	6	9	8.14	13.83	8.96	5.99	1.4	20.14	13.72	8.37	15.1	5.75	0	7.35	8	2.77	4.34	6.96	4.38	0	18.66	11.34	19.91	10	0.5	4.34	9.5	0.3	2	9.69	13.1	1.16	0.4	0	4.08
K01523	hisE; phosphoribosyl-ATP pyrophosphohydrolase [EC:3.6.1.31]	8174.74	8142.76	8252.68	7818.5	8359.46	14300.2	10635.3	9139.41	7696.5	9926.28	7818.76	9696.92	7939.36	9427.96	10294.5	8201.06	9035.28	10381.2	11244.1	7491.01	10516.2	9254.02	8016.21	11246.2	12065.5	13180.7	581.35	5786.32	7641.5	5147.4	7469.11	7101.41	9834.16	8928.15	15290.2	6580.66	12274.2	10402.2	6995.7	10601.1	5194.99	8362.15
K01524	ppx-gppA; exopolyphosphatase / guanosine-5'-triphosphate,3'-diphosphate pyrophosphatase [EC:3.6.1.11 3.6.1.40]	15244.1	16466.6	15820	16941.8	14159.7	25150.2	21424.6	18414.6	15575	15998.6	14199.4	16039.5	11057.8	13952.4	15577	12704.8	16430.9	16220.9	15068.7	9959.64	15678.8	13320.3	11199.2	17837.7	14774.7	16542.1	786.65	9615.16	11191.1	6995.37	11330.2	11132.8	14044.2	11739.4	15588.4	7680.76	16681.3	17038.3	10518.2	13599.9	8031.7	16884.2
K01525	apaH; bis(5'-nucleosyl)-tetraphosphatase (symmetrical) [EC:3.6.1.41]	2472.35	3592.86	2405.34	5390.42	5971.62	6946.09	5481.74	4521.67	4032.95	3889.65	2907.32	3622.64	2008.4	3131.4	3163.71	2610.42	3320.71	3234.38	3321.61	2267.09	2452.73	4074.1	2667.49	8167.97	3639.97	3594.12	174.53	1981.49	4043.84	1430.91	3039.91	4104.92	4465.42	2255.92	8555.14	1176.67	4076.04	3420.8	2715.2	2287.73	1749.49	1934.12
K01531	mgtA, mgtB; Mg2+-importing ATPase [EC:3.6.3.2]	260.13	423.27	233.17	24.49	75.11	258.58	114.94	106.41	98.83	212.85	251.96	198.81	93.62	76.43	80.55	208.22	287.79	242.01	159.41	191.33	119.11	185.26	196.4	51.75	662.67	896.3	8.53	109.5	96.5	59.39	100.7	69.84	125.5	72.33	33.46	28	379.5	209.71	210.64	161.65	125.5	167.65
K01533	copB; Cu2+-exporting ATPase [EC:3.6.3.4]	16964.5	16605.9	17020.9	16094.6	15410.1	24290.2	19585.2	16741.4	14183	19315.7	17098.6	19167.8	13030.6	15904.6	17729.3	16807.3	20262	21691.7	19252.6	13814.2	18647.7	14018.9	15223.3	19870	16307.4	16657.6	930.18	9594.48	10866.7	8131.27	15273.6	13903.1	16042.1	17720.7	21715.3	11008	23139.1	20459.4	14209.7	17040.6	9444.32	12042.1
K01534	zntA; Cd2+/Zn2+-exporting ATPase [EC:3.6.3.3 3.6.3.5]	13947.3	13209.2	15067.3	18102.3	9470.95	22577.5	23585.2	20163.1	17069.8	17386.1	14573.1	16839.7	13496.2	15758.3	18356.4	15184.9	16861	18498.3	17869.9	12133.3	19546.7	12990.4	13074.5	15644.4	16879.7	15652.2	946.89	7872.47	8234.4	8522.28	15031.4	8115.63	11991.1	17816.5	16021.2	11869.6	21465.9	19289.8	11653.5	16646.8	7998.84	15663.7
K01535	PMA1, PMA2; H+-transporting ATPase [EC:3.6.3.6]	6.5	11	8.5	0	0.5	2	0	1	0	13	5	5	104.5	19.5	93.5	12	2.5	10	253.5	98.5	270	4	11	0.5	6.5	4	0	0	0	0.5	2.5	0	2	32	0	0.5	8	14.5	10	76	12	8
K01537	E3.6.3.8; Ca2+-transporting ATPase [EC:3.6.3.8]	11384.5	10002.5	12477.9	16939.7	11263.6	17450	18834.8	16305.6	13363.6	11704.1	8536.35	10973.7	7678	9988.78	11216.8	8749.73	9338.44	9868.91	9650.99	5530.78	9936.58	9914.74	8934.22	15350.1	13135.2	12264.4	683.32	5232.83	5970.66	5961.3	8602.36	5731.44	6981.58	9165.22	7396.64	5599.16	11320.7	10637.2	6491.75	9183.65	4078.87	10964.1
K01539	ATP1A; sodium/potassium-transporting ATPase subunit alpha [EC:3.6.3.9]	0.5	0	0	0	0	0	0	0	0	1	0.5	0.5	5	0	1.5	0.5	0.5	1	14	0	0	1	0	0	0	0	0	0	0	0	0	0	1	0	1	0	1	0.5	0	0	1.5	3.5
K01545	kdpF; K+-transporting ATPase ATPase F chain	7	8	8.67	0.33	8.67	0	0	0	0	3.66	2.67	3	2	0.67	1.33	1	0.66	3.33	1	11	10.67	39	5.67	22	572	837	3	17	9	4.8	10.67	5	4	0	1	0	2	3	6.67	0	0	0
K01546	kdpA; K+-transporting ATPase ATPase A chain [EC:3.6.3.12]	425.33	559.72	453.09	232.32	209.95	581.58	479.75	366.74	320.58	478.64	529.38	423.99	535.94	429.41	648.8	482.55	637.61	565.76	803.5	621.17	833.2	358.93	359.41	260.09	993.45	1451.38	42.86	509.83	337.5	548.54	303.34	255.84	582.5	242.97	364.12	225.67	740.77	636.7	364.72	832.15	327.5	597.08
K01547	kdpB; K+-transporting ATPase ATPase B chain [EC:3.6.3.12]	328	383.18	357.1	217.66	194.62	441.58	461.41	355.46	305.25	334.97	385.72	327.32	455.95	335.74	563.13	346.21	472.95	416.76	645.33	512.17	692.53	321.6	323.08	232.09	829.45	1203.38	36.86	428.16	283.17	501.54	277.34	238.17	560.5	216.3	349.46	169	593.78	537.04	294.73	474.15	221	450.58
K01548	kdpC; K+-transporting ATPase ATPase C chain [EC:3.6.3.12]	333.33	417.72	372.09	227.32	201.95	464.58	474.75	361.74	310.58	455.64	491.38	385.99	511.94	394.41	619.8	463.55	594.61	535.76	768.5	578.17	821.2	347.93	341.41	256.09	983.45	1435.38	39.86	470.83	275.5	539.54	286.34	243.84	573.5	224.32	357.12	175.67	681.77	578.7	308.72	816.15	301.5	584.08
K01551	arsA, ASNA1, GET3; arsenite/tail-anchored protein-transporting ATPase [EC:3.6.3.16 3.6.3.-]	10575.1	8880.84	10843.9	10983.8	6540.53	15787.7	14133.8	12266.3	10322	12575.8	10006.4	13440.7	11443.7	13151.7	14793.9	11483.6	11716.9	16919.5	14866.7	10425.8	15740.7	9448.92	10623.1	9072.25	13503.5	13438.2	759.2	5854.98	6294.23	6800.5	11172.5	7128.48	9665.64	15905.1	12925.2	10638.6	14476.7	13228.2	8437.87	15544.7	7142.25	15698.8
K01555	FAH, fahA; fumarylacetoacetase [EC:3.7.1.2]	1990.09	2274.84	1923.79	2411.67	2088	3783.49	3084.25	2713.58	2213.41	2777.08	3117.23	2495.78	1761.39	2253.84	2350.42	2508.87	3854.16	2706.12	2175.54	1657.17	2294.71	1196.68	1085.47	2415.17	1975.84	3334.08	118.7	1667.66	1557.84	1106.5	1805.5	1727	1497.51	2078.17	1722.33	1889.5	2557.77	2430.7	1748.95	1316.33	1203	2071.38
K01556	KYNU, kynU; kynureninase [EC:3.7.1.3]	4386.16	4123.43	4316.12	3572.84	3154.33	5410.25	4689.5	4153.94	3307.66	4487.32	4543.48	4444.61	2648.75	3331.95	3451.9	3948.74	5493.67	4842.25	3877.02	3195.51	3807.75	3167.68	3416.8	3869.58	3193.17	4070.91	195.03	2381.83	2202	1522.5	2627.67	2657.5	3200.67	3274.61	2207.52	2612	5886.9	4368.19	3473.87	3209.75	2444.5	2505.23
K01560	E3.8.1.2; 2-haloacid dehalogenase [EC:3.8.1.2]	7990.82	7267.01	7692.1	8738.85	7782.67	12468.4	9575.16	8339.1	6964.58	8126.24	7908.06	8314.67	7633.24	8872.04	9927.88	7701.56	9551.11	9883.82	9515.01	5424.86	9275.77	5429.36	6442.46	6740.09	8587.19	10991.7	492.51	5676.81	5374.17	4335.8	4939.34	4829.44	6045.33	8994.59	7465.27	6343.49	9525.57	8799.75	6266.73	7247.73	4086.54	9081.88
K01561	dehH; haloacetate dehalogenase [EC:3.8.1.3]	1302	1208.27	1219.2	2161.17	1903.33	2548	3098.16	2716	2100.67	868	1016.89	989.03	812.53	810.17	909.33	972.33	1150.33	1043	1488.99	527.84	1162	504.6	439.31	1251.67	1737.84	2797.83	53.53	919.16	985.67	470.3	464.17	861	387.67	283.33	385.5	279	1563.4	1137.03	802.2	679	180	366.49
K01563	dhaA; haloalkane dehalogenase [EC:3.8.1.5]	1479.66	1354.65	1638.49	1676.82	1088	4169.49	1499.67	1271.66	1110	1614.26	1629.82	1556.45	1078.6	2202.67	2131.17	1228.66	1814.15	1289.9	1965.79	1530.84	1940.72	1871.32	1470.17	1297.34	2042.16	2148.5	82.66	893.67	669.5	762	1392.67	1091.51	1434.5	824.16	936.24	590.67	1968.57	1944.99	1236.49	2563.82	1135.99	2019.88
K01565	SGSH; N-sulfoglucosamine sulfohydrolase [EC:3.10.1.1]	108.5	47	148.5	96	20	73	64	44	38	96.5	98.5	97	52.5	135	129	116	148	148	73.5	45	113.5	206	162.5	100	73	43	4	64	62	22.5	84.5	24	46	77.5	66	95	184.5	321.5	158	75	66.5	95
K01567	pdaA; peptidoglycan-N-acetylmuramic acid deacetylase [EC:3.5.1.-]	100.03	88.66	106.28	98.5	26.5	91.5	46.5	41.5	23.5	90.67	116.83	80.33	75.3	37.9	76	85.33	157.49	96.33	58	71.3	91.47	140.67	131.83	70.5	100.5	52.5	2	55.5	63.5	12.7	58.5	51.61	139	561.5	72	58	215.45	159.45	124.2	58.5	27.88	32
K01568	PDC, pdc; pyruvate decarboxylase [EC:4.1.1.1]	1.5	0.5	2.5	0	0	0	0	0	0	0	0	0.5	0	0	1	0	0	0	0	0	0	1.5	1	0.5	0	0	0	0	0	0	0	0	0	0	0	0	1	0	0	0	0	0
K01569	oxdD; oxalate decarboxylase [EC:4.1.1.2]	14.66	8.99	24.08	15.66	13	19.33	13.33	11.33	6	22.01	31.99	19	12.67	6.33	15	24.66	58.99	36.33	14.5	40.33	25.54	48.33	14	16.67	39.66	20.34	1.33	6	14	27	15	15.89	37	2	9.33	0	48.28	83.08	23.33	11	23.26	8.17
K01571	oadA; oxaloacetate decarboxylase, alpha subunit [EC:4.1.1.3]	2258.6	2517.83	2629.21	2766.13	4302.53	4366.04	2830.77	2446.9	2175.95	2681.09	1815.24	2832.81	1904.46	2730.62	2841.29	2094.7	2038.58	2709.94	2825.9	1314.23	2150.05	2236.63	2639.52	3464.81	1948.88	1868.5	85.95	880.33	1008.79	813.83	1210.08	1211.75	1388.08	1136.35	910.92	691.92	2477.11	2503.27	2184.28	2250.29	1056.37	1227.16
K01572	oadB; oxaloacetate decarboxylase, beta subunit [EC:4.1.1.3]	2205.9	2416.55	2303.36	1858.88	2916.24	4018.79	2491.09	2099.58	1951.66	2881.59	2433.49	3013.52	2171.66	2966.72	3138.29	2540.7	3017.08	3392.69	3808.9	1532.93	2766.75	1628.38	1884.45	2915.31	2634.13	2832.5	70.45	833.83	611.79	694.63	1219.58	1057.25	1261.58	2158.49	982.92	988.42	1774.11	2291.57	2282.08	2336.79	1211.87	1323.66
K01573	oadG; oxaloacetate decarboxylase, gamma subunit [EC:4.1.1.3]	1116.38	1468.86	981.47	552.5	1993.95	1814.67	688.66	578.75	558.99	1263.67	1133.66	1339.9	871.04	509.67	676.74	1170.45	1433.75	1578.86	1770.78	665.51	1069.46	692.25	1069.52	2185.93	1300.63	1541.62	21.33	309.33	216.67	234.88	479.08	344.25	562.08	396.75	145.92	184.17	755.78	1261.33	1326.08	866.91	537.66	568.21
K01574	adc; acetoacetate decarboxylase [EC:4.1.1.4]	375.17	769.66	309.92	2254	2234.67	1465.66	725.67	639.67	557.67	617.83	665.67	611.17	355.33	711.67	719	563.33	748.32	668.83	398.67	287	445.17	324.33	294.84	2940.67	789.67	979	32.33	195.33	244.67	232	1062.67	1271	752.67	292.5	102.5	111	374.34	468.08	400.17	104	196	285
K01575	alsD, budA, aldC; acetolactate decarboxylase [EC:4.1.1.5]	34.93	42.16	48.64	17.5	64.49	96.07	266.36	183.49	164.86	85.28	31.74	73.9	13.5	21.37	24.58	38.92	34.47	31.99	19.08	27.5	47.63	23.17	8.26	36.04	50.39	60.58	20	32	138	177.48	580.7	172.28	136.84	5.67	330.66	82	17.08	26.67	14.56	17.83	67.88	81.15
K01576	mdlC; benzoylformate decarboxylase [EC:4.1.1.7]	595.5	712.68	568.87	3893.5	1127.42	4226.33	2261.67	2029.92	1758.42	1153.83	959.57	1023.45	1931.45	2175.17	2164.91	1005.08	1122.74	1357.58	2300.5	1201.25	1959.67	707.43	540.97	889.75	1997.75	2454.75	92.03	668.5	1062	730.8	884.17	751.5	1028.75	2532.75	1228.75	1092	944.32	909.2	513.12	2118.17	1153.5	5018.75
K01577	oxc; oxalyl-CoA decarboxylase [EC:4.1.1.8]	4.5	2	3.5	3	3	24.67	32	14	12	26.5	85	54	160	36.4	143.8	42.1	103.1	79.6	180	15	243.1	33	3	18	554	800	3	22	5	34.33	13	18	48	2.5	190.3	1	9.4	60.1	8	143.4	2	70
K01578	MLYCD; malonyl-CoA decarboxylase [EC:4.1.1.9]	568.83	503.92	491.01	1401.17	555.83	1826	1753	1574.25	1244.5	536.75	555.92	570.5	843.17	489.17	741.91	528.17	598.83	611.25	1370.09	573.59	1237.75	340.42	537.42	531.84	1067.92	1190.91	40.33	382.66	389.17	460.8	430.42	770.25	578.25	275.25	745.25	299.5	842.25	836.58	468.25	768.58	164	331.33
K01579	panD; aspartate 1-decarboxylase [EC:4.1.1.11]	11536.8	13291.4	11735.8	14380.5	11488.7	16672.8	16256.1	13784.6	11627.4	12428.1	10399.2	12251.2	8490.39	10253.9	11531.5	9760.2	12191.1	12384.5	12589.6	8313.14	12566.7	9501.93	8499.65	16004.5	11388.9	9871.38	633.36	5884.66	8578.5	5214.61	9837.41	9458.36	10821.4	9305.22	12596.6	5154.67	13143.5	13525.1	8134.34	10799.1	6798.21	14445.1
K01580	E4.1.1.15, gadB, gadA, GAD; glutamate decarboxylase [EC:4.1.1.15]	644.67	420.62	739.08	921	757	1304.67	457.83	383.5	336.12	481.58	359.84	598.9	369.28	1320.97	1352.27	261.65	329.62	334.23	779.12	336.84	810.58	544.67	486.58	372.55	668	542.33	23	441	213.17	340.06	423	445.67	334.67	252.65	207.6	185.5	478.09	376.28	437	749.79	253.16	401.71
K01581	E4.1.1.17, ODC1, speC, speF; ornithine decarboxylase [EC:4.1.1.17]	1530.4	1386.23	1405.04	2966.75	2321.03	4387.34	3870.26	3402.07	2722.62	1430.95	1418.19	1514.18	1579.86	2014.13	2643.26	1401.81	1590.19	1763.4	2285.66	1029.17	2478.03	895.52	900.81	1785.67	2383.49	3450.42	79.7	1518	1425	878.59	841	1167	1492.49	1536.86	1277.27	916	1921.15	1426.15	894.15	1899.46	884.66	1072.83
K01582	E4.1.1.18, ldcC, cadA; lysine decarboxylase [EC:4.1.1.18]	455.09	370.17	404.16	273.21	117.91	364.79	316.83	250.82	193.04	341.81	254.28	269.99	214.34	154.95	241.64	325.61	252.39	323.98	332.98	299.75	324.79	283.63	272.94	220.21	324.41	183.64	30.12	148.5	150.12	153.07	236.5	364.67	327.5	304.82	149.71	104.25	310.64	278.61	191.45	424.35	216.88	320.93
K01583	E4.1.1.19; arginine decarboxylase [EC:4.1.1.19]	4	1.5	2.5	3	0	5	3	3	0	9	7	8	99	11	116.5	12	3	15	231	79	273	9	31.5	1	4	0	2	3.5	9	7	4	2	4	78.33	12	30	7.5	3	9	92	12	17.5
K01584	adiA; arginine decarboxylase [EC:4.1.1.19]	629.59	610.26	649.7	387.34	145	551.25	646.25	548.33	448.91	304.25	515.4	384.57	493.11	556.07	701.71	278.39	538.6	331.97	524.08	199.92	475.93	598.68	485.05	381.75	2053.42	3071.25	16.2	149.33	147.67	96.7	213.25	375.25	225.92	494.42	440.88	287.5	590.92	617.72	492.87	259.57	507.33	178.5
K01585	speA; arginine decarboxylase [EC:4.1.1.19]	4276.25	5856.89	4386.04	6197.21	6956.78	8482.3	5560.75	4690.04	3944.4	7622.66	6505.89	7309.38	4246.04	5332.12	6332	5928.62	7867.61	7662.34	6959.76	4361.59	7090.2	6169.38	4306.06	11242.3	5102.79	4648.42	277.98	3080.83	5061.95	2398.16	5175.91	5649.03	5892.91	4472.3	10271.3	2417.59	7184.83	6616.94	4725.18	5212.53	3530.75	4607.79
K01586	lysA; diaminopimelate decarboxylase [EC:4.1.1.20]	19233	19492.1	20403.1	21459.2	16531.9	27735.3	26948	23125.2	19299.9	21784.6	17088.3	21140.3	15486.8	19990	22456.2	17635.4	19722.6	21904.8	22586.2	14804.7	22713.6	18195.1	16527.4	20792.7	21986.2	21685.3	1169.3	10676.5	13233.1	10192.9	17087.9	13520	17402.3	18029.8	22255.5	11142.8	24540.3	21973.8	14068.9	21471.3	11211.6	21625.8
K01588	purE; 5-(carboxyamino)imidazole ribonucleotide mutase [EC:5.4.99.18]	17948	19330.1	18518.1	21396.4	17327.9	28846.5	27346	23453.7	19727.9	20703.9	17069.1	20076.5	14744.5	16992.1	19526	17140.6	19944.5	21462.4	21029	14407.9	21769.9	16108.6	15285	22689.4	19314.9	18801	1114.3	10375.3	12882.1	9723.76	15737.4	12372.7	16595	17674.5	20784.6	10471.6	23356.3	21972.8	13660.5	20120.9	10800.6	20895.5
K01589	purK; 5-(carboxyamino)imidazole ribonucleotide synthase [EC:6.3.4.18]	10935.6	12476.9	10827.9	11206.1	10964.6	19608	15654.9	13329.5	11237.9	13831.1	11887.7	13500	9571.23	11425.2	12667.5	11823.3	14092	15208.5	13460	9751.59	13781.2	11437.3	10859.2	14331.9	12877.1	14346.5	709.3	7238.82	9000.62	6130.56	9010.94	8258.2	11144.7	11599.1	16409.6	7765.08	16143.9	15326.2	9389.3	13683.9	7322.58	11440
K01590	hdc, HDC; histidine decarboxylase [EC:4.1.1.22]	2	0.12	5	0	0.12	5	0.5	5	0.12	12	13	3	9	6	20	12	14	19	5	43	14	0	0	1.38	0.62	0.38	2	32	0	0.38	0	0.5	3	0.33	0	0	4	0	2	19	37	4
K01591	pyrF; orotidine-5'-phosphate decarboxylase [EC:4.1.1.23]	18482.8	19633.8	19142.2	22057.9	18078.7	29056	27595.5	23684.2	19913.8	21163.9	17447.1	20641.8	14858	18579.8	20919.7	17315.6	20281.6	21689.9	21246.5	14531.6	21944.8	16551.9	15709.1	23154.8	19965.4	19297.5	1137.3	10609.8	13104.6	9883.26	16927.4	13732.2	17146.2	17844.4	20906.6	10620.1	23623.3	22222.6	14026	20611.9	11004.4	21162.3
K01592	TYDC; tyrosine decarboxylase [EC:4.1.1.25]	0	0	0	0	0	0	0	0	0	0	0	0	0	0	0	0	0	0	0	0	0	0	0	0	0	0	0	0	0	0	0	0	0	0	3	0	0	0	0	0	0	0
K01593	DDC, TDC; aromatic-L-amino-acid/L-tryptophan decarboxylase [EC:4.1.1.28 4.1.1.105]	928.33	1004.66	799.49	1126.16	1723.33	1390	1396.84	1304.66	978.83	756.67	804.99	741.67	659.49	948.67	1042.67	776.34	1053.66	804	811.17	578.5	901.17	487.33	427.33	1151	1429	1789	38	774.67	812.33	269	422	397.67	589.5	562	352.66	248.67	1105.24	895.16	644.99	885	324	1389
K01594	CSAD; sulfinoalanine decarboxylase [EC:4.1.1.29]	6.5	14	10	61.5	8	146	48.5	32	22	22.5	14	20	87	42	20	16	27.5	7	120	28.5	22	18	5	11	19.5	21.5	5	35	7	54.5	37.5	33	14.5	250	18	10	10.5	2.5	3.5	12	7	5
K01595	ppc; phosphoenolpyruvate carboxylase [EC:4.1.1.31]	8820.92	10222.3	8921.06	7792.41	7554.42	15486.1	12419.7	10453.1	8937.36	11758.2	9617.26	11579.9	8229.31	9720.07	10923.6	9778.01	11333.8	12958.7	11657.9	8398.93	12112.1	10140.2	9516.14	13051.1	12288.8	12985.7	606.18	6020.82	7565.83	5417.51	7929.11	7253.92	9829.33	10612.3	15677.8	7284.33	12989	13404.7	8064.97	11923.3	6217.82	10575.6
K01596	E4.1.1.32, pckA, PCK; phosphoenolpyruvate carboxykinase (GTP) [EC:4.1.1.32]	1061.08	1002.65	1186.16	1025.16	877.33	1185.83	863.09	765.41	644.58	990.17	1006.91	1062.42	686.32	1775.84	1713.34	679	1075.74	825.5	1423.59	1021.25	1278.59	1079.5	946.17	742.42	1162	1190	76.5	829.5	462.5	656.5	755	754.17	866.34	665	445.57	412.67	1176.65	1106.24	839.16	1386.75	695.83	1039.33
K01597	MVD, mvaD; diphosphomevalonate decarboxylase [EC:4.1.1.33]	1154.75	1455.32	1290.24	3198.66	2742.2	3170.83	2274.62	1902.57	1645.32	2724.12	2698.45	2414.74	1680.24	2001.71	2092.33	2576.51	3506.24	2892.08	2909.75	998.17	1752.87	1394.41	935.16	3727.16	1557.77	1083.95	68	714.17	744.83	785.27	3398.2	1360.84	1694.5	1675.67	1934.32	680.67	1757.65	1468.41	1147.82	1063.33	1119.5	1506.4
K01598	PPCDC, coaC; phosphopantothenoylcysteine decarboxylase [EC:4.1.1.36]	33.5	26.83	41.5	4.99	30.87	12.66	1.86	0.66	1.33	12.71	12.28	7.99	11.34	5.53	7.75	15	10.16	13.66	9.25	16.83	16.96	24.16	7.17	9	25.93	8.54	0.33	0	2	7.6	8.2	15.34	15	0	0.33	0	11.49	3.33	8.66	16	57.5	6.57
K01599	hemE, UROD; uroporphyrinogen decarboxylase [EC:4.1.1.37]	12203.4	15029.7	12687.7	14799.2	13666.8	19002	17382.9	14793.9	12653.4	15275.9	12686.4	14434	9249.99	12528.2	13820.6	12502.7	14864.6	14817.8	14847.4	10323.6	14182	12630.4	9910.98	17868.6	15819.9	15203	776.36	7540.66	9489.17	6710.41	14781.4	10767.7	13657.2	9965.19	15840.2	5528.34	16148	15253	9499.49	14501.7	8767.2	12764.5
K01601	rbcL; ribulose-bisphosphate carboxylase large chain [EC:4.1.1.39]	3564.84	4844.16	3461.01	2990	7043	7846.16	5321.17	4362.17	3811.17	4743	3765.34	4789.67	3224.83	4382.17	4400.5	3393.16	4346.65	4692.33	4840.67	3401	4332.84	5094.83	4092.84	8964.17	5795	5847.17	310.33	3196.83	6869.17	2218	3329.17	4299.33	5569.83	3117.83	17760	2112.5	5539.33	5639.33	4231.67	5085	2622.5	4550.33
K01602	rbcS; ribulose-bisphosphate carboxylase small chain [EC:4.1.1.39]	1542.67	2061	1561.17	1243.5	2696.83	2064	1405.5	1144.5	995.5	1904.67	1367.67	2537.5	1021	1623	1593.5	1221.83	1611.33	2718	1504.5	1109	1227.17	2038.5	1634.5	3800	2911.83	3727.17	117.5	1289	2956	762.5	1278	1260.83	1130.66	1319.83	8137.5	819.5	2790.33	2315.33	1847.5	1307	957	1167.33
K01607	pcaC; 4-carboxymuconolactone decarboxylase [EC:4.1.1.44]	5608.8	5710.83	5084.72	7149.25	6234.49	8028.98	6751.91	5990.25	4784.24	4015.05	3741.08	4122.51	4147.29	5065.17	5379.84	3624.62	4252.28	4328.16	5369.09	2810.42	4826.79	2838.05	2845.07	4393.19	6183.41	9093.58	221.9	3546.82	3921.35	1743.09	3255.75	3468.14	2721.18	3943.33	3363.33	2874.5	5414.94	4375.4	3023.64	4247.49	1927.37	6502.33
K01608	gcl; tartronate-semialdehyde synthase [EC:4.1.1.47]	149.12	194.39	129.7	193.5	12.5	1071.67	83	67.25	66.75	47.75	55.94	64.7	324.7	74.9	128.38	28.1	57.6	49.6	622.25	241.25	228.85	85.35	131.05	56.5	644.75	887.25	8.2	150.5	77.5	49.03	65.25	82.25	58.75	26.75	17.55	32.5	105.64	135.8	126.15	79.65	100	61.5
K01609	trpC; indole-3-glycerol phosphate synthase [EC:4.1.1.48]	18093.9	19240.6	18602.4	21803	17976.2	28169.8	27026.4	23211.3	19482.7	20749.7	17093.4	20169	14463.7	18224.2	20559.7	16907.6	19896.5	21091.4	20831	14230.7	21548.4	16266.6	15383.6	22983.4	19827.1	19122.7	1123.3	10335.3	12982.6	9715.85	16684.1	13590.7	16871.5	17332	20514	10251.9	23279.6	21732.5	13649.8	20204.4	10881.1	21024.8
K01610	E4.1.1.49, pckA; phosphoenolpyruvate carboxykinase (ATP) [EC:4.1.1.49]	4449.46	4941.76	4539.52	6629.5	4562.04	9892.33	7815.74	6700.36	5568.19	7134.15	6635.02	6932.42	4901.25	4843.41	6115.36	6345.54	7946.52	7979.92	7694.88	4903.89	7498.74	4708.26	3701.99	5874.97	4990.87	5589.12	229.19	3182.16	3318.67	2720.41	3621.08	3042.2	3714.5	5251.28	3803.24	2400.67	7146.33	6368	3860.68	6322.98	3836.87	4979.94
K01611	speD, AMD1; S-adenosylmethionine decarboxylase [EC:4.1.1.50]	3068.92	3919.9	3351.9	3804.13	4767.07	7704.54	4977.76	4309.94	3519.75	4065.48	2970.38	3809.54	1963.23	3084.46	3034.01	2913.92	3463.03	3520.71	3072.51	2475.56	2578.79	4790.08	3422.61	6350.3	4380.95	4221.42	190.85	2587	4670.12	1637.19	2556.17	3556.78	4850.49	2950.68	9488.65	1489.42	5167.44	4362.09	3296.59	2366.02	2031.92	2258.63
K01613	psd, PISD; phosphatidylserine decarboxylase [EC:4.1.1.65]	12025.9	14315.4	12265.5	13359.9	12287.7	20731	16894.4	14426.3	12331.5	15987.3	13499.1	14813.8	11452.9	13644.6	15793.6	13224.6	15927.9	15852.5	17446.8	11755.4	17218.6	12152.6	11511.3	17355.5	15299.5	14791.7	829.98	7768.99	9184.96	7350.66	11590.1	10165.2	13136.2	13281	17502.6	7690.09	18909.2	17459.7	11268.8	16750.2	8488.91	14170
K01615	gcdA; glutaconyl-CoA decarboxylase [EC:4.1.1.70]	10	11.45	11.58	6	13	43	55	56.38	41	26.67	27	31.33	22	23.67	23.67	27	37	16	43	45.67	50.67	16	46.25	1	19	40	4	35	43	35	80	44	58.67	198	49	162	6	11.25	23	140	36.33	135.33
K01616	kgd; 2-oxoglutarate decarboxylase [EC:4.1.1.71]	10.83	14.83	7.17	2	4	7.25	13	6	8.75	23	15	20	8.5	9.5	6	15.33	19	26.25	12	0.33	12.5	7.17	13.17	4.5	19.33	17	2	4	16	26	30	20	20	7	79.83	0	15.83	14	14.17	3	3	16
K01617	dmpH, xylI, nahK; 2-oxo-3-hexenedioate decarboxylase [EC:4.1.1.77]	99	168	103	386	6	2034	164	134	126	54.33	55.33	64.33	64.66	83.33	65	42.66	62	77.33	72	133.67	122.33	34	39	12	22	32.33	5	63	67	48	21	12	14	225.5	54.33	47	131	78.33	72.33	92.66	46.33	159
K01619	deoC, DERA; deoxyribose-phosphate aldolase [EC:4.1.2.4]	14246.8	13850.8	15105	19227.5	12422.9	23472	24434.5	20990.9	17656	16950.9	14074.5	16149.9	12374.5	14264.5	16066.3	14628.1	16612.1	17958	17360.2	11713.1	17170.7	12236.5	12169.5	17086.8	14511.6	13810.5	830.1	7533.99	8487.95	7540.26	12821.8	8880.37	10898.2	15145.5	11947.7	9276.41	17021.5	17056.4	10106.5	16655.3	8947.92	18148.5
K01620	ltaE; threonine aldolase [EC:4.1.2.48]	14746.7	14921.6	15476.2	18114.5	12406.3	22161.1	19209.1	16611.1	13837	16110	13329.7	15854.2	12117.8	13867	15942.6	13777.1	15533.3	17259	16450.5	10633.9	16818.4	11776.6	11875.8	15959.9	14283.3	14468.8	818.84	7726.99	8262.12	7578.26	13290.1	9060.26	11900.5	14212.8	11192.9	8851.25	16644.8	15995.5	9826.71	15289.2	7979.2	17284.4
K01621	xfp, xpk; xylulose-5-phosphate/fructose-6-phosphate phosphoketolase [EC:4.1.2.9 4.1.2.22]	487.01	372.47	617.34	651.5	218.83	527.33	669.5	534.5	430.5	378.5	359.51	942.5	482.16	427.33	638.42	329.16	367.63	1396.33	753.67	777.34	764.67	823.67	434.17	395.67	1746.5	2642	24.5	352.33	215.67	333.6	396	175.83	255.33	692.83	441.5	392.5	565.67	678.66	255.16	735.16	478.83	758.33
K01622	K01622; fructose 1,6-bisphosphate aldolase/phosphatase [EC:4.1.2.13 3.1.3.11]	267.5	236.5	298.5	147	167.5	344	1046.5	867	808	346	325.5	298.5	213.5	313.5	307	329	408	328.5	312.5	294.5	497.5	260.5	364.5	196	264	359	71	293.5	371	646	2254	441	801	399	1194.5	185.5	702	549.5	398	562.5	139.5	405.5
K01623	ALDO; fructose-bisphosphate aldolase, class I [EC:4.1.2.13]	1537.34	1758.91	1369.76	4072.5	4053.83	4464.83	3480.5	3025.11	2507.25	1850.92	1786.5	1869.75	1391.71	2256.5	2511	1626.24	2054.16	1934.33	1756.03	947	1937.75	1250	1055.42	4046.67	1687	2617	87	1475.33	1319.67	529.5	1550.5	1861.33	1522.5	1140.94	783.86	489.5	2949.58	2045.83	1427.08	1270.16	800.83	943.39
K01624	FBA, fbaA; fructose-bisphosphate aldolase, class II [EC:4.1.2.13]	13053.1	14166.4	14176.2	14789.5	12963.6	18333.5	17685.6	15112.8	12688.7	14243.8	10818.8	13772.6	8396.62	10832.7	11884.6	10777.6	12487.5	13616	12276	7944.48	11800.6	12537.9	10813.9	15354.5	13403.4	12672.9	699.15	7624.99	10366.5	6006.52	8950.11	8242.53	10520.4	9382.96	21954.7	6282.42	15910.2	14131.1	8701.08	11340.3	7458.25	13424.7
K01625	eda; 2-dehydro-3-deoxyphosphogluconate aldolase / (4S)-4-hydroxy-2-oxoglutarate aldolase [EC:4.1.2.14 4.1.3.42]	9871.39	8080.89	9766.85	13084.4	9914.75	15325.5	13809	11693.8	9685.28	8965.32	8762.95	9627.41	6521.55	7951.77	9490.58	8000.51	10319.4	10905.3	8782.39	5083.01	9206.92	5986.91	6995.51	12730.4	8300.72	9681.66	506.17	5184.65	5077.79	4849.29	6880.07	6307.86	6080.91	8928.31	7467.63	6812.41	8136.84	8611.2	6319.59	6518.43	4013.58	5872.75
K01626	E2.5.1.54, aroF, aroG, aroH; 3-deoxy-7-phosphoheptulonate synthase [EC:2.5.1.54]	8163.41	10787	7990.08	10800	12387.9	16311.6	11952	9992.29	8690.91	9537.77	8220.85	9816.89	6205.78	7720.61	8824.97	7470.04	9416.71	10020.6	10122.9	7151.35	9732.11	8232.66	7056.63	13785.8	8485.25	9974.02	514.99	5390.15	6976.68	4308.73	7344.72	8036.19	9182.84	5993.67	11886.1	3514.51	10627.6	10123.8	7211.86	7999.2	4803.47	6446.91
K01627	kdsA; 2-dehydro-3-deoxyphosphooctonate aldolase (KDO 8-P synthase) [EC:2.5.1.55]	11074.4	12172.3	11562.1	13467.8	13187.9	16308.8	16494.2	14163.1	11724.7	11764	9842.64	11348.8	7164.48	9861.91	10990.3	8844.83	11426	10423.7	11595.9	6908.26	10673.6	9853.51	8662.9	15614.1	10350.7	10636.9	562.86	6328.49	8215.84	4718.71	8530.91	8161.09	9759.59	6662.95	11948.1	3391.67	12650.1	11620.1	7873.86	9660.73	6176.32	8788.62
K01628	fucA; L-fuculose-phosphate aldolase [EC:4.1.2.17]	7500.53	5258.91	8011.98	8389.29	4069.6	9235.95	10151.6	8881.59	7248.88	7786.99	5120.13	7386.99	6131.11	6789.17	8264.59	6013.95	5925.93	7619.68	8779.03	4863.38	9983.1	6603.14	5703.97	7236.64	8037.01	6844.96	373.97	3675.65	4245.29	3377.28	7087.66	5111.17	5877.42	6513.45	11176.5	3303.91	9729.02	7553.96	4217.31	9125.27	3597.54	11817.2
K01629	rhaD; rhamnulose-1-phosphate aldolase [EC:4.1.2.19]	12.26	9.88	7.22	5	0.12	5.67	2	2	2	6.64	2.58	8.54	18.5	10.4	23.8	4.22	9.71	3.1	54.5	28.5	80.1	7	26.43	4	9.62	4.38	0	12	10	18.91	20	6.5	22	2.5	16.3	16	15.61	16.18	5.83	25.4	109	2.75
K01630	garL; 2-dehydro-3-deoxyglucarate aldolase [EC:4.1.2.20]	3680.42	3238.95	3724.95	2914.16	2215.05	5753.83	4985.5	4362.24	3692.59	4840.31	3944.98	4669.38	4245.25	4782.72	5459.38	4650.29	4681.42	5919.18	5294.33	4031.58	6056.12	3574.99	3868.59	3535.92	5251.21	5247.63	308.15	2208.99	2307.5	2786.91	3037.33	2259.5	3346.75	6209.9	5204.54	4172.49	5663.42	4942.57	3231.25	6007.72	2739.83	4621.26
K01631	dgoA; 2-dehydro-3-deoxyphosphogalactonate aldolase [EC:4.1.2.21]	1571.52	1635.21	1416.45	1524.67	1806.57	2209.5	1934.33	1698.25	1348.17	1031.39	1150.03	1066.91	951.75	939.07	990.38	989.51	1308.63	1054.47	1658.58	645.34	1217.6	541.25	697.12	1164.67	742.83	1300.34	51.33	967.66	975.17	503.96	503.92	733.25	453.92	454.75	859.05	503.5	1564.65	1258.68	1025.37	528.15	577.5	290.91
K01633	folB; 7,8-dihydroneopterin aldolase/epimerase/oxygenase [EC:4.1.2.25 5.1.99.8 1.13.11.81]	9175.43	11603.5	9138.33	14139	13178.8	17742.2	13446.7	11391.7	9875.14	11813.2	10484.6	11937.3	7657.15	9965.45	10988.6	9761.66	12493.1	13043.1	10813.7	7316.56	10729.2	8847.44	7419.64	13993.5	10314.8	11143.9	554.53	5959.66	8114.17	4732.01	8312.11	8742.03	10423.6	8519.22	12979.4	5143.34	12011.8	11796.3	8055.25	8673.23	6012.37	11413.1
K01635	lacD; tagatose 1,6-diphosphate aldolase [EC:4.1.2.40]	174.83	182.33	162	194.49	98.17	45.66	99.16	88.66	60.33	93.18	92.66	98.34	55.84	35.83	31.5	95.33	101.16	93.16	97.5	73.33	47.54	153.99	73.67	39	633.33	880.34	15.33	142.5	70	48	48.5	39.34	87.5	66.5	42.83	74	93.65	41.33	56.77	50	228	33.67
K01637	E4.1.3.1, aceA; isocitrate lyase [EC:4.1.3.1]	4475.58	4661.26	4366.58	2471.41	3518.78	5221.92	3746.83	3217.52	2723.2	4354.81	3979.47	4206.63	3057.36	2399.01	2778.79	3651.67	4750.12	4727.96	5625.3	3875.59	3796.23	3370.02	4477.31	4535.8	3326.79	3800.37	170.53	2223.5	3529	1776.41	3454.08	2203.92	3093.25	3155.19	2733.23	1792.34	5672.37	5252.96	3941.11	4000.06	3080.66	3209.19
K01638	aceB, glcB; malate synthase [EC:2.3.3.9]	3926.58	4736.54	3663.75	3435.91	5412.28	6029.25	4856.16	4159.02	3443.82	4579.81	3794.47	4570.13	3081.19	3589.58	4413.09	3649.6	4434.05	4545.89	5023.8	2815.09	4850.66	4185.02	3518.14	6161.02	4325.46	5089.87	183.03	2873.33	4435.34	1776.94	3051.08	3952.59	5152.42	2403.69	1874.53	1958.84	7258.02	5440.06	3915.45	3372.63	2348.66	2529.19
K01639	E4.1.3.3, nanA, NPL; N-acetylneuraminate lyase [EC:4.1.3.3]	296.24	286.24	337.17	167.66	133.46	203.5	274.66	210.83	162.16	665.91	619.45	542.38	232.01	259.06	313.05	705.3	825.9	741.18	424	325.16	535.61	696.49	267.67	315	1044.12	1171.72	18.83	273.33	166	128.91	374.83	220.51	276.17	146.67	162.3	136.5	463.43	600.93	293.61	474.07	204.33	321.75
K01640	E4.1.3.4, HMGCL, hmgL; hydroxymethylglutaryl-CoA lyase [EC:4.1.3.4]	4289	4884.67	4062.12	8268.92	6133.82	9612.74	6280.66	5485.71	4617.74	4679.76	4662.56	4424.18	4456.65	5291.86	5713.39	3957.63	5549.56	4719.61	5602.34	2897.28	5382.63	4115.77	3174.31	7019.94	4568.61	5217.39	206.19	2517.81	3174.85	1991	3997.67	5366.28	6018.18	4509.55	2784.46	2943.84	4551.08	4580.11	3003.03	3604.91	2695.2	7177.15
K01641	E2.3.3.10; hydroxymethylglutaryl-CoA synthase [EC:2.3.3.10]	4992.82	4447.97	5345.77	5830.49	3228.06	8439.16	8577.88	7420.15	6275.01	7304.79	5781.27	6721.24	6046.66	6210.02	7107.9	6782.23	6786.08	8311.58	9138.82	6839.5	8923.57	5422.32	5557.47	4958.49	7155.29	6843.52	464.47	3111.49	3368.49	4218.1	7168.36	3483.5	6190.16	7296.3	7575.14	4778.82	9099.62	7180.44	4694	9948.14	4255.83	6683.74
K01643	citF; citrate lyase subunit alpha / citrate CoA-transferase [EC:2.8.3.10]	42.95	58.31	39.02	99.05	28.87	107.29	148.36	136.57	118.91	66.48	64.25	57.87	137.12	63.61	97.68	55.89	80.05	67.77	74.12	71.08	105.47	26.13	30.93	32.26	38.29	38.26	2.12	52.33	34.12	55.33	102.33	53.67	91.17	21.27	182.47	43.75	49.28	84.76	70.83	131.45	22.21	64.2
K01644	citE; citrate lyase subunit beta / citryl-CoA lyase [EC:4.1.3.34]	6801.69	5869.15	6507.35	5056.3	3009.3	7935.11	7264.03	6411.36	5395.66	7523.81	6381.91	7460.2	6277.36	6800.77	7557.76	6847.28	7399.48	9046.02	8302.71	6529.75	7928.07	5266.72	6214.58	5982.11	8538.47	9849.83	423.44	4222.81	3827.63	4360.13	5711.66	4812	6588.76	8809.17	7053.71	6580.74	8877.52	7458.48	5139.25	9132.36	4087.87	6149.13
K01646	citD; citrate lyase subunit gamma (acyl carrier protein)	7.95	12.31	13.02	83.05	14.87	80.29	122.36	110.57	90.91	30.48	14.25	26.87	17.12	3.61	12.68	30.89	24.05	25.77	35.12	15.08	38.47	15.13	17.93	10.26	5.29	11.26	1.12	30.33	5.12	8.33	35.33	11.67	22.17	21.27	0.47	28.75	5.28	10.76	20.83	20.45	11.21	20.2
K01647	CS, gltA; citrate synthase [EC:2.3.3.1]	22456.7	23661.8	23019.8	28257.5	21582.6	34980.5	29859.8	25748.4	21596.6	24362.9	20015.5	23963.2	17572.7	22973	24746	19946.7	23203.6	25251.7	24761.2	16256.9	23974.4	19393.8	18626.7	26644.2	23804.7	24491.7	1239.18	11770.1	14464.7	10900.5	19288.9	15479.1	19490.5	20044.1	22504.5	12662.2	25280.1	25374.8	16390.7	23370.7	12734.1	28133.1
K01649	leuA, IMS; 2-isopropylmalate synthase [EC:2.3.3.13]	29452.3	30279.8	31069	32066.2	25011.2	41575.4	38407.4	33094.4	27482.1	30500.7	24049.2	29944.7	22185.8	27952.1	31519.1	24496.8	27480.5	30724.1	31677.8	19622	32906.6	25352.5	23827.1	30994	30420.4	29164.2	1697.16	15964.1	18759.6	14305.3	25670.6	19141.2	24579.8	24895.7	33722.1	14788.1	36769.3	33448.9	19893.6	30789	14889.2	32424.8
K01652	E2.2.1.6L, ilvB, ilvG, ilvI; acetolactate synthase I/II/III large subunit [EC:2.2.1.6]	31164.3	32139.5	32085.4	37481.6	30279.5	50706.6	41730.8	36053	30034.1	34979	27715.4	34640.1	26373.9	33479.8	37713.5	28552.9	31870.3	36414.7	37633.8	23425.7	37728.5	29689.2	25746.4	38612.2	36800.7	38801.2	1812.52	17511.6	21212.9	16258.6	26132.5	24255.5	29257	30537.2	38387.5	19223.3	40621	35464.7	23392	34035.8	16982.8	33537.3
K01653	E2.2.1.6S, ilvH, ilvN; acetolactate synthase I/III small subunit [EC:2.2.1.6]	18145.9	18806.1	19032	19043.3	15929	26691.9	24019.6	20712.8	17285.2	20185.5	16233.6	19718.1	14714.1	17867.4	20259.9	16337	18816.3	20507	21170.7	13477.9	21434.4	16547.2	15372.7	20331.8	20075.5	19273.7	1102.92	10126.6	12605.9	9551.29	16619.9	12778.5	16618.7	17199.7	20523.2	10292.2	23110.5	21112.7	13263.5	20080.7	10456.8	20850.9
K01654	E2.5.1.56, neuB; N-acetylneuraminate synthase [EC:2.5.1.56]	3044.07	3080.17	3686.92	1849.09	2278.33	3788.33	2177.24	1954.58	1625.07	3998.34	3101.25	3629.76	1561.58	1383.51	2112.23	2936.61	3674.98	3233.61	2658.74	1119.68	3043.16	4316.51	2829.15	4472.84	4047.5	3919.73	73.83	831.83	863.17	1003	2170.33	1004	1376.83	927.5	1001.83	649.67	5296.44	3543.67	2055	1892.5	472.66	1348.33
K01655	LYS21, LYS20; homocitrate synthase [EC:2.3.3.14]	206.83	464.83	191.5	342.5	277	233	492.5	424	297	589.5	328.33	445.33	193	221	238.5	561.33	412.33	461	445.83	298	447.5	350.5	465.83	655.5	222.5	196	5	64	201	49.5	70.5	104.5	78	44.33	57.5	28	884.66	612	277.5	463.33	232	161.17
K01657	trpE; anthranilate synthase component I [EC:4.1.3.27]	21343.8	21605.6	22156.8	23507.7	18223.3	32545.6	30473.2	26232.2	21963.7	25414.6	20036.8	24612	18306.3	21898.3	25129.6	21080.7	23331.8	26578.3	26279.2	17379.3	27034.2	20365	18949	23854.8	25012.7	24655.6	1356.31	12148.1	14758.3	12003.3	18398.4	14564.9	19652.2	21868.5	25203	14030.7	30077.4	26363.8	16529.5	25573.7	13133.2	24686.4
K01658	trpG; anthranilate synthase component II [EC:4.1.3.27]	21994.5	22345.4	22905.3	25996.6	20980.8	33660.9	31198.5	26835.6	22469.6	25923.7	20828.9	25199.8	18634.5	23524.1	26690.4	21732.2	24179.5	27099.4	26871.3	17579.5	27784.1	20495.6	19297.6	26344	25078.5	23802	1363.64	12545	15076.5	12003.5	19371.8	15352.4	19887.6	22130.3	25314.7	13434.1	29559.5	26622.8	16926.4	26008.3	13385.5	24426.1
K01659	prpC; 2-methylcitrate synthase [EC:2.3.3.5]	958.75	1458.51	890.37	2695.92	3522.33	3529.58	1622.41	1362.38	1179.79	1844.97	1258.03	1659.14	992.98	1658.57	1665.21	962.92	1398.08	1035.38	1638.28	1008.51	1393.14	2341.27	1317.06	4657.47	1601.42	699.91	67.53	647.16	2547.84	486.2	2257.92	3133.42	3368.92	874.75	370.13	335.5	2297.54	1574.63	1146.42	850.39	1061.16	875.54
K01661	menB; naphthoate synthase [EC:4.1.3.36]	6401	6528.4	6392.87	7921.17	4315.71	11931.6	9428.76	8104.43	6944.78	9122.39	8112.41	8937.87	7370.88	8235.84	9347.78	8460.12	9857	11496.5	9055.27	6546.59	10091.7	5636.75	5639.75	6486.79	8084.88	8847.37	486.15	4312.99	4155.16	4545.91	6060.83	4344.11	6083.58	10538	7176.14	6869.16	9020.58	9234.31	5525.75	8799.22	4097.04	11461.9
K01662	dxs; 1-deoxy-D-xylulose-5-phosphate synthase [EC:2.2.1.7]	14138.3	15441.8	14720.5	16746.9	13509.2	21105.1	20436	17506.8	14590.2	14697.9	12166.8	14551	9792.45	12600.5	14428.3	11250.1	14064.1	14210.5	14348.2	9141.81	14647.2	12184.6	10617.7	16240	13900.4	13483.9	718.48	7766.49	10079.5	6072.46	10069.4	9847.03	11560.1	10776.1	14251.1	6034.42	15861.4	14983.2	9613.59	13075.8	7004.08	15028.8
K01663	HIS7; glutamine amidotransferase / cyclase [EC:2.4.2.- 4.1.3.-]	84	80.83	70.83	21.5	27.5	37	54	55.5	33	69.67	76.5	68.83	54.5	99.67	107.17	54.5	94	59.5	140	76.67	160.67	53	97.5	58	51.5	63.5	11.5	61.5	61.5	65	89.5	76	65.67	85	19	98.5	40.5	47	41.5	211.5	48.83	227.83
K01664	pabA; para-aminobenzoate synthetase component II [EC:2.6.1.85]	1086.97	1291.56	1233.81	1375.38	1346.58	1623.12	899.59	839.94	663.12	1210.06	771.91	1037.65	493.63	738.55	785.34	906	848.13	992.88	596.1	721.08	795.66	1519.31	1372.76	1166.93	1286.79	1527.93	45.12	549.33	360.29	521.46	649.33	453.95	813.17	1111.85	483.41	327.25	1509.86	1327.59	553.95	570.45	352.09	572.64
K01665	pabB; para-aminobenzoate synthetase component I [EC:2.6.1.85]	5101.98	6221.77	4960.37	9078.41	8398.57	10863	8786.34	7370.44	6453.06	7513.83	6817.63	7788.26	5140.63	7579.85	8219.63	6297	8151.2	8595.21	7642.11	5181.84	6929.58	5081.51	4266.4	10235.7	5818.04	7022.71	341.36	4490.66	5518.67	3160.71	5164.91	5052.7	4638.92	6417.95	11304.4	3879.34	6513.31	6879.87	4856.8	5513.48	3844.2	5240.45
K01666	mhpE; 4-hydroxy 2-oxovalerate aldolase [EC:4.1.3.39]	511.59	925.88	385.59	2710.34	2157	3492.83	1088.5	957.21	841.99	848.58	758.86	863.98	548.31	1112.9	1085.46	649.59	875.09	867.68	481.62	328.84	617.64	542.1	427.72	3183.5	635.58	768.99	39.2	249	502.5	271.7	1425	1508.5	919	913.17	240.13	899	516.08	646.71	462.81	320.39	263.83	787.88
K01667	tnaA; tryptophanase [EC:4.1.99.1]	961.02	1073.15	1100.94	2062.71	1182.93	4837.12	3099.67	2692.34	2323.59	2294.39	2103.74	2231.29	2134.45	2201.44	2619.25	2229.71	2647.12	2836.85	2866.11	1677.75	3215.45	1474.46	1194.15	1455.34	1378.76	1387.79	60.44	558.66	581.95	605.45	927.33	924.33	1452.58	2267.78	2839.21	1427.41	1639.76	2427.98	1182.42	3034.77	1436.88	2426.87
K01668	E4.1.99.2; tyrosine phenol-lyase [EC:4.1.99.2]	2	2.67	4.25	0	0	1	4	1	1	2.14	4.38	0.79	2.17	0	0	1.62	4.97	2	3	0	3	2	6.42	3	7	15	0	0	0	22	9	0	1	0	0	0	4.71	5.58	2.21	1	5	2
K01669	phrB; deoxyribodipyrimidine photo-lyase [EC:4.1.99.3]	17392.1	18963.7	17893.2	22323	17465.2	33806.9	26329.7	22711.9	18981.8	24017.8	20808.8	23486.6	17202	19312.1	21880.8	21279.1	25071.3	27304.5	24195.9	15456.2	24160.5	18035.5	16735	24168.5	20900.2	22103	1219.65	11077.6	13298.3	10521.2	14713.5	13400.8	17369.1	21203.4	22247.1	13398.8	27789.2	24485.7	15353.5	20249.1	11267.6	20193.6
K01671	yihT; sulfofructosephosphate aldolase [EC:4.1.2.57]	0	0	0	0	0	0	0	0	0	0.14	0.71	0.29	0.5	0.4	0.8	0.39	1.24	0.1	0.25	0	3.35	0	0	0	3	0	0	0	0	1.2	0	0	5	0.5	0.3	0	1.11	1.1	0.71	0.4	0	0.75
K01673	cynT, can; carbonic anhydrase [EC:4.2.1.1]	16693.7	18452.3	16740.9	22955	18944.9	26685.7	22804.5	19435.9	16368	18862.4	17339	18879.6	13486.9	16032	18755.4	15992.7	20313.9	20766.6	19391.5	12778.6	20554	13891.5	13285.4	25558.5	16472.1	18205.1	966.23	9321.49	11804	8768.12	14916.4	13817.5	15171	15206.8	18985.7	10016.8	18071.3	18896.8	12493.5	17602.7	9585.91	19658.1
K01674	cah; carbonic anhydrase [EC:4.2.1.1]	425.37	826.55	403	45.5	145.7	177.25	49.95	40.75	30.62	533.84	437.53	470.19	146.17	141.7	118	452.62	499.86	439.25	301.5	150.75	146.7	197	299.67	1751.63	610.6	668.7	6	98.5	108.5	37.6	87.7	45	59	72	71.33	84	475.46	363.08	382.44	96.25	54	61.4
K01676	E4.2.1.2A, fumA, fumB; fumarate hydratase, class I [EC:4.2.1.2]	2829.55	3202.2	2883.97	1925.74	3901.4	4746.58	2066.91	1717.49	1542.7	3642.1	2753.79	3676.05	2344.72	3488.98	3859.68	2529.1	3198.9	3289.72	4071.62	2186.93	3290.34	3825.44	2798.74	4677.81	4203.67	3813	107.03	1043.16	1449.34	1153.82	1732.08	2914.92	4309.09	1844.75	1113.26	956.84	2804.63	2771.65	2523.04	2837.96	1424.99	1716.62
K01677	E4.2.1.2AA, fumA; fumarate hydratase subunit alpha [EC:4.2.1.2]	1377.75	1490.15	1788.54	1919.13	2281.29	3012.95	3006.68	2718.08	2211.42	2053.25	1174.83	1815.21	1381.25	1362.78	1808.55	1674.75	1293.66	1794.83	2072.54	1332.05	2560.97	1867.38	1960.92	1781.55	1241.17	1040.88	118.12	796.83	1107.29	1148.45	1686	1228	1351.5	1872.74	973	742.25	3800.58	2657.69	1329.2	1984.88	735.88	1531.12
K01678	E4.2.1.2AB, fumB; fumarate hydratase subunit beta [EC:4.2.1.2]	1376.08	1487.82	1784.87	1919.13	2281.29	3007.62	3003.68	2716.08	2209.42	2051.25	1169.83	1812.54	1381.92	1364.78	1807.88	1669.75	1291.33	1789.83	2071.87	1334.05	2558.97	1863.38	1960.25	1780.88	1240.5	1038.88	118.12	796.5	1103.62	1148.45	1686	1228	1350.83	1874.74	973	742.25	3798.58	2657.69	1329.2	1984.88	735.88	1533.12
K01679	E4.2.1.2B, fumC, FH; fumarate hydratase, class II [EC:4.2.1.2]	13975.7	16163.9	14124.8	18248.4	14405.9	23584.7	20484.5	17478.8	14879.6	17865.5	15036.7	17197.7	13308.5	15720.2	17812.5	15186.6	17729.1	19172.6	18882.3	12640	18931.1	13900.1	12455.1	19466.2	16472.3	17705.8	922.38	8729.32	10868.3	8088.01	15004.2	11602.5	15378	15668.3	19605.1	9739.83	19064	18206.2	11461.8	17731	8866.53	19275.6
K01681	ACO, acnA; aconitate hydratase [EC:4.2.1.3]	16943.3	20224.6	17053.6	24220.4	19375.6	31833.7	25609.3	21957.7	18718.4	22221.2	18954	20485	16009.1	19429.6	22160.7	18893.8	22454.9	22079.8	23425.1	15098.7	23446.5	16022.9	14832.2	25333.6	19621.6	18655.7	1092.66	10707.6	12893.6	9798.17	18477.6	15009.9	18094.8	18328.7	21672.4	10836.2	24519.5	23213.1	14515.2	21046.2	11057.6	21923.6
K01682	acnB; aconitate hydratase 2 / 2-methylisocitrate dehydratase [EC:4.2.1.3 4.2.1.99]	2677.27	3094.94	2800.01	2646.42	3660.95	4707.67	2835.82	2458.42	2098.95	2680.07	1859.57	3411.51	1740.1	1534.57	2026.21	1952.42	2141.63	3661.71	2791.23	1361.59	2341.36	2902.6	2672.32	3755.39	2431.05	3303.79	52.03	636.49	736.51	660.41	1046.91	680.92	934.58	1098.75	717.14	686.67	2934.04	2628.05	1953.04	1919.98	1160.49	1325.33
K01683	araD; D-arabinonate dehydratase [EC:4.2.1.5]	1289.17	606.58	1205.17	406	243.25	494.83	525	448.75	364.75	431.5	358.33	568.42	325.58	234.5	238.42	357.75	449.08	743.25	417.67	151.75	178	323.5	870.17	115.92	205.92	31.25	7	65.83	75.17	108.5	310	447	277.42	691.25	98.75	103	134.25	118.5	298.25	130	43	44.42
K01684	dgoD; galactonate dehydratase [EC:4.2.1.6]	3790.26	3475.27	3861.75	3411.16	2095.39	5300.99	4824.16	4093.47	3536.51	4071.92	3671.5	4114.23	3271.99	3694.36	4172.46	4000.11	4470.66	5241.14	4105.07	3128.92	4092.3	3071.91	3766.83	3937.09	5042.49	5387.69	293.64	2661.8	2332.34	2821.41	2883.9	2264.58	2919.01	4735.12	4557.95	3907.81	4869.3	4946.03	3176.05	3873.12	2288.99	2961.84
K01685	uxaA; altronate hydrolase [EC:4.2.1.7]	1519.04	1453.62	1419.28	2288.22	2088.62	2689.37	3269.08	2897.71	2324.87	1256.55	1476.49	1408.05	1383.45	1840.28	2003.93	1203.96	1681.83	1512.72	2074.38	1002.92	1630.69	1034.04	765.44	1094.31	1859.05	2247.34	67.28	1123.65	1098.13	829.66	1128.75	1402.7	1073.09	1081.47	1032.72	613.25	1811.51	1428.25	944.24	1117.78	1008.09	937.7
K01686	uxuA; mannonate dehydratase [EC:4.2.1.8]	976.67	1101.38	990.96	2489.44	1161.24	3340.08	2989.5	2548.51	2177.17	1591.87	1713.5	1486.5	1264.41	1298.83	1427.47	1656.51	2051.18	1961.6	1832.32	936.59	1200.19	757.51	856.78	1604.09	1098.5	1105.43	55.57	942.66	646.74	625.96	706.25	718.53	720.92	1289.35	973.22	569	1560.02	2576.16	1301.83	826.91	1174.47	620.32
K01687	ilvD; dihydroxy-acid dehydratase [EC:4.2.1.9]	21135.8	21698.6	21746.5	22690.7	18973.9	33585.8	29260.2	25156.7	21065	23147.1	18915.3	22653.5	17792.2	21667.1	24509.2	19050.5	21883.1	23863.8	25199.4	15735.9	25128	18849.8	17656.9	23157.4	25174	26652.8	1255.12	12045.6	14427.3	11219.8	17624.3	14776	18616.3	20784.7	22614.1	12109.9	29022.8	25516.6	16003.4	22330.7	12127.6	22283.3
K01689	ENO, eno; enolase [EC:4.2.1.11]	18947.4	20010.4	19815.1	23405.2	18397.9	30620.1	27971.9	23988	20165.6	21913.3	17710.5	21234.1	15660.1	19300.2	21768.2	17916.2	20551.8	22312.4	22591.2	14945.5	22805.6	17473.2	16163.6	23626.9	20835.4	20227.5	1157.8	10769.3	13244.6	10175.3	17738.4	13954.7	17741.3	18283	21320.6	10797.1	24636.2	22616	14184.7	21284.9	11194.2	21887.3
K01690	edd; phosphogluconate dehydratase [EC:4.2.1.12]	1918.51	2195.22	1705.5	4562.67	4154.95	5738.09	3228.91	2821	2311.29	1624.31	1837.9	1664.14	1512.9	2136.07	2403.04	1495.51	1999.08	1673.13	2227.11	1260.76	1968.89	942.85	1143.15	4150.3	1003.21	1629.29	91.03	1145.83	1197.17	707.71	1790.42	1932.92	1459.08	1380.25	1117.47	675	2048.96	1663.3	1400.12	942.39	938.66	954.29
K01692	paaF, echA; enoyl-CoA hydratase [EC:4.2.1.17]	8076.96	8279.2	7868.39	8785.14	3942.94	11131.6	8016.27	7009.89	6148.81	6907.17	5630	7244.34	6313.34	9255.57	9833.31	5243.1	5991.46	7019	7306.6	4471.09	7211.35	7787.3	5573.49	6942.28	12364	15408.7	461.1	4531.16	4370.01	3694.71	7585	8548.35	9562.85	6828.5	4732.09	6749.68	7151.07	6682.51	4313.88	7745.63	3413.31	11203.7
K01693	hisB; imidazoleglycerol-phosphate dehydratase [EC:4.2.1.19]	17443.8	17686.3	18366.3	17302.2	14914.1	24045.1	21887.7	18915.5	15719.7	17961.1	13783.5	17894.2	13496.2	16811.9	18798.5	14218.6	15593.9	18219.1	19418.3	12629.6	19665.5	16159	15019.1	18913.2	19269.4	18207.1	1043.3	9041.49	12020	8737.85	15164.1	12075.2	16094	15404.3	19712.6	9570.58	21915.3	19646.2	12232.3	19090.4	9706.08	19444.8
K01695	trpA; tryptophan synthase alpha chain [EC:4.2.1.20]	18385.8	19554.8	19055.7	22033.5	18044.2	29107.6	27549.5	23639.2	19886.6	21016.9	17264.8	20448.1	14662.9	18332.5	20696.7	17181.9	20076	21441.9	21129.6	14288.9	21742.3	16539.9	15640.2	23120.4	19923.6	19212.9	1138.13	10549.1	13083.1	9817.26	16804.1	13716.7	17116.8	17426.8	20720.6	10478.1	23486.2	21982.5	13882.5	20470.3	10979.2	21098.6
K01696	trpB; tryptophan synthase beta chain [EC:4.2.1.20]	19366.9	20749.7	19936.3	22465.5	19230.8	32700.5	28614	24655.6	20640.6	22452.2	18626.6	21925.3	16940.9	20741.5	23451.8	18648	21683.9	23193	23470.5	15645.1	24609.3	17925.4	17052.1	25135.5	23320.8	22733.6	1271.96	11262.6	14201.6	11048.3	17595.8	14082.9	18273.6	20258.6	23596.7	12281.9	24858.1	24069.1	14940.9	23487.1	12254.1	23354
K01697	CBS; cystathionine beta-synthase [EC:4.2.1.22]	1382.92	2289.15	1362.66	4380.66	3434.95	5125.33	3727.51	3125.48	2683.31	4151.99	4537.54	3520.5	2039.34	2369.01	2574.5	3939.3	5819.96	4328.5	2833.25	1894.33	2844.26	1483.08	1242.72	5266.33	1563.45	1965.55	121.53	1814.17	1240.16	1562.55	2767.33	2344.68	2258.34	2360.84	1343.56	1605.84	2709.83	3241.02	2022.84	1516.67	1367.83	2680.92
K01698	hemB, ALAD; porphobilinogen synthase [EC:4.2.1.24]	18403	19510.2	19071.4	21901.5	17684.1	28568.1	26615.5	22854.3	19121.1	20987	17266.1	20426.2	14654.9	18468.6	20784.4	17181.9	20057.1	21429	20993.2	14364.1	21720.5	16644.9	15682.6	23062.1	20127.2	19456.7	1067.8	10478.8	12566.6	9323.54	16634.2	13205.5	16934.2	17691.7	20775.6	10509.6	23722	22080.8	13878.5	20518.8	10960.4	21076.4
K01699	pduC; propanediol dehydratase large subunit [EC:4.2.1.28]	1.59	6.08	4.06	1	4	2	16	15	15.33	3.14	4.5	2.62	0	0	1.33	0.29	3.8	2	0.67	0	2	1.67	5.34	1.67	29.33	5.33	0	0	0	0	9	0	9.33	7	14	0	0.96	4.25	1.16	3	0	3
K01702	LEU1; 3-isopropylmalate dehydratase [EC:4.2.1.33]	0	0.75	0	0	0	0	0	0	2.25	1.5	0	0	0	0	0	0	0	0.75	0	0	0	0	0	0	0	0	0	0	0	0	0	0	0	0	0	0	0	0.75	0.75	0	4	0
K01703	leuC, IPMI-L; 3-isopropylmalate/(R)-2-methylmalate dehydratase large subunit [EC:4.2.1.33 4.2.1.35]	18838.1	19704.7	19707.7	19153.2	16087	27353.3	24385.6	20970.9	17508	21087.5	17012.5	20486.6	15096.6	18240.4	20693.9	17291.5	19823.4	21581.1	21714.5	14083.2	22180.2	17039.8	15722.2	20449.1	20486.1	19958.3	1124.96	10555.5	12888.6	9931.76	16513.8	12845.7	17139	17815.3	21043.2	10451.1	24290.5	22010.9	13866.3	20617.9	10648.4	21222
K01704	leuD, IPMI-S; 3-isopropylmalate/(R)-2-methylmalate dehydratase small subunit [EC:4.2.1.33 4.2.1.35]	18808.1	19647.7	19679	19159.2	16089	27403.3	24367.6	20969.4	17499	20994.5	16926.5	20436.6	15061.6	18259.9	20687.9	17170.5	19619.4	21434.1	21623	14028.2	22082.2	17095.8	15734.2	20517.1	20532.1	19928.3	1122.46	10470.5	12888.6	9802.76	16511.8	12864.7	17136	17717.4	21037.7	10475.1	24383.2	22051.4	13846.3	20656.9	10650.4	21208
K01705	LYS4; homoaconitate hydratase [EC:4.2.1.36]	2	2	2	0	1	1	4	1	1	2	3	0	2	0	0	1	3	1	3	0	3	1	0	1	20	16	0	0	0	22	0	0	0	0	0	0	1	1	0	1	5	2
K01706	gudD; glucarate dehydratase [EC:4.2.1.40]	286.09	471.39	266.97	96.17	51.45	457.34	145.16	114.5	111.67	167.14	198.33	214.95	397.5	129.57	240.46	138.72	248.38	243.6	722.32	362.34	359.6	149	89.27	83	729.79	1030.71	18.33	327.33	249	237.41	234.17	59.61	91	92	44.3	120	292.03	372.93	260.83	106.4	88.38	191.49
K01707	kdgD; 5-dehydro-4-deoxyglucarate dehydratase [EC:4.2.1.41]	329.5	446.25	268.67	110.67	63.83	428	92.83	77.75	67.17	234.75	216.58	247	391.25	133.67	204.58	177	214.5	258.75	706.33	330.34	322.75	232.75	221.26	245.17	834.59	1201.58	14.33	222.16	136.17	239	323.42	358.36	151.42	91.75	58.75	53.5	266.67	237.08	210.92	126.75	102.38	149.66
K01708	garD; galactarate dehydratase [EC:4.2.1.42]	277.26	367.91	233.81	106.67	64.45	422	91.33	75.5	58.67	173.14	123.33	187.79	87	66.57	85.13	120.39	116.24	178.6	88.83	89.34	138.6	194	83.94	184.67	744.46	1105.71	11.33	80.66	114.67	119.08	154.17	44.61	72.67	73	192.3	90	186.36	115.93	129.5	30.4	3.38	81.16
K01709	rfbG; CDP-glucose 4,6-dehydratase [EC:4.2.1.45]	310.2	298.11	308.36	54.16	51.83	147.33	61.34	44.66	33.45	122.84	148.83	132.84	113.32	65.67	121.34	110.34	151.32	153	181.34	115	126.67	164.83	102.5	52.55	92.17	237.5	10	121.5	121	60.8	85	34.78	75.17	110	82.16	73.67	184.32	131.36	122.13	403	113.38	236.5
K01710	E4.2.1.46, rfbB, rffG; dTDP-glucose 4,6-dehydratase [EC:4.2.1.46]	19055.3	20969.5	20062.6	23458.4	19138.7	29813.3	25016.2	21433.9	18114.3	22085.6	18220.2	21328.1	16179.9	20495.3	22258.1	17591.3	21203.3	21548.9	23222.6	14021.6	22228.5	18981.9	15553.3	25507.8	24184.5	22095.5	1107.01	10541.1	13659	9675.86	19622.8	14353	18682.1	16611.6	18851.5	10045.2	24682.2	23035.4	13558.3	19790	11362.4	26081.4
K01711	gmd, GMDS; GDPmannose 4,6-dehydratase [EC:4.2.1.47]	7330.98	8495.01	7938	10390.2	6443	11750.5	12128	10180.8	8643.82	10431.2	9427.77	10172.8	6669.69	9322.85	10920.9	8751.77	11144.9	10623.8	10952.9	6818.01	11557.9	7149.59	5851.9	8861.34	9175.33	10051.3	463.53	5379.66	5162.34	4478	9469.83	6221.84	7605.01	6165.33	13571.2	3296	12833.4	10956.2	6617.91	9575	4649.65	8658.73
K01712	hutU, UROC1; urocanate hydratase [EC:4.2.1.49]	3751.48	4837.08	3953.02	6858.88	4989.46	7480.87	5837.5	4978.58	4239.49	7857.58	6622.89	7019.13	5138.09	6090.89	7153.45	7378.15	8028.65	8463.04	8121.31	5448.1	7857.4	4154.15	3555.53	7687.68	4861.97	5503.66	255.14	2902.32	3007.62	2723.13	5111.66	4429.45	5334.34	4801.87	3564.9	2827.58	7910.7	6729.91	4095.91	6469.79	3737.25	6377.82
K01713	pheC; cyclohexadienyl dehydratase [EC:4.2.1.51 4.2.1.91]	197.93	324.34	149.01	7	32.12	117.33	12	8	12.33	91.33	118.52	95.2	64.86	109	64.67	66	159.33	93	89.67	162	133.67	50.6	50.23	31.67	63.29	244.38	3.2	100.33	69.67	19.38	76	38.5	23.67	32	206	69	157.65	136.2	133.32	35	50	139
K01714	dapA; 4-hydroxy-tetrahydrodipicolinate synthase [EC:4.3.3.7]	27107.4	27737.1	27908.1	30614.5	25082.9	41201	37111.9	31917.5	26890.6	30895.7	25915.2	30089.5	23129.9	29062	32380.7	26572.9	30219.1	32929.3	32558.7	22502.4	33147	25364.9	23085.4	32268.7	35862.7	39004.9	1685.2	17238.6	19098.5	15374.7	24050.2	19822.8	24864.9	28006.9	30524.7	18318.6	36036.2	33109.6	20593.4	30392.9	16486.7	28661.1
K01715	crt; enoyl-CoA hydratase [EC:4.2.1.17]	7119.29	8075.17	7318.31	15279	11224	15027.8	12084.2	10604.4	8897.34	10652.1	8863.9	10160.2	7911.69	12085.6	12893.6	9178.83	10300.4	10941.8	12004.1	8151.24	11792.3	6315.03	6261.34	11415.9	6405.7	6931.78	385.43	4865.81	4756.46	3685.45	6933.84	6620.67	6956.19	7502	5095.5	3509.25	11113.3	9565.61	7110.33	10777	6519.54	11740.7
K01716	fabA; 3-hydroxyacyl-[acyl-carrier protein] dehydratase / trans-2-decenoyl-[acyl-carrier protein] isomerase [EC:4.2.1.59 5.3.3.14]	3193.76	3552.95	3052.34	2964.17	4650.12	5398.51	3705.99	3204.92	2657.03	3065.15	2695.82	3195.05	2150.07	2949.4	3124.37	2278.67	3106.29	2976.13	3206.36	1922.84	2621.98	2883.52	2398.48	5106.22	3721.38	5242.95	180.53	2778.66	4123.67	1299.71	2058.41	2216.42	2199.08	1947.92	9111.64	1224.67	4346.29	3403.8	2876.03	2499.48	1767.99	1801.62
K01719	hemD, UROS; uroporphyrinogen-III synthase [EC:4.2.1.75]	9693.67	10829.6	9781.56	13364.2	11998.4	20533.1	17625.6	14980.8	12797.3	14969.6	13419	13747.4	9964.07	11825.7	13390.1	13036.3	16250	15556.2	14346.3	9889.02	14245.5	10740.9	9081.96	16148.4	14928.6	17237.5	776.85	8066.82	9148.5	7219.38	10161.9	9507.47	11787.3	12465.4	17394.8	7916.83	15294	13967.1	9587.81	13028.9	6808.91	10857.2
K01720	prpD; 2-methylcitrate dehydratase [EC:4.2.1.79]	1031.83	1733.92	871.38	3105.33	2805.83	4120.49	1789.16	1464.08	1286.92	1493.73	1629.35	1355.16	1093.61	1201.73	1308.05	1304.21	1890.56	1332.76	1803.67	1250.01	1563.02	1213.85	1050.57	3622.18	1022.92	1199.25	71.36	1034.32	2130.51	625.7	1569.42	1437.53	1028.76	718.75	371.96	239.5	2415.5	2141.96	1431.41	950.48	875.21	1000.83
K01721	nthA; nitrile hydratase subunit alpha [EC:4.2.1.84]	1367.78	1242.8	1353	2166	3160	2428	2749.66	2476	1876.66	1082	1494.12	1232.82	1349.66	2238	2462.66	1170.66	1674.98	1309	1708.66	843	1906.5	637.34	602.82	1177.34	1840.66	2088.66	66	1443	1469	612	590	1169	753.66	1217	1074.5	616	1673.91	1467	1060.94	1401	166	698.66
K01724	PCBD, phhB; 4a-hydroxytetrahydrobiopterin dehydratase [EC:4.2.1.96]	11783.6	12987.2	11811.3	14672.6	12602.9	20673.4	15831.5	13637.1	11536.7	15804.8	13095.5	15222.3	10913.1	13724.4	15126.1	13563.7	15475.8	17388.8	14733.6	10417	15202.8	12267.4	10446.5	17949.5	14381.7	15817.4	743.68	7961.66	9859.33	6590.8	12028.9	9762.25	12954.2	13380.6	17604.6	8592.83	17289.4	15954.8	10221.1	13961.6	7445.99	15956.8
K01725	cynS; cyanate lyase [EC:4.2.1.104]	1221	1641.27	1272.2	1286.5	535.28	2570.34	929.66	791	645.5	1091.67	1029.4	1605.36	944.03	1021.4	1108.46	843.92	1071.09	1918.26	1095.49	716.51	839.27	1024.6	700.14	3126.5	2518.96	3526.04	86.03	1321.33	1250	677.88	579.83	709.66	720.16	1094.83	8126.97	626.67	1261.29	1146.79	855.03	700.23	525.33	648.49
K01727	hysA, hylA, hylB; hyaluronate lyase [EC:4.2.2.1]	3	8	9.67	3	17	6	75	49	36	17	21.5	25.5	3	3	11	17	44	25	7.5	1	8.5	11	6	3	24	34	11	139	48	126	50	28	53	2	12	0	4.17	3	4	0	1	4
K01728	pel; pectate lyase [EC:4.2.2.2]	205.29	153.45	240.58	62	30	63	65	50	23	259.67	260.12	209.46	136.33	176.5	211.67	277.12	329.91	226.12	232.67	252	331	253	198.67	166.67	199.34	184	6	191.33	63.67	127	100	49.61	97	64	105.67	91.5	269.7	230.08	139.12	291	102.88	241.5
K01729	algL; poly(beta-D-mannuronate) lyase [EC:4.2.2.3]	111	159.85	135.52	209	24	1088.68	186	156	153.25	90.68	58.73	54.62	46.2	35	88	51.74	81.82	92.99	23.5	69.5	49	35.1	55.8	16	44.68	77	14.2	123	102	131	39	6	22.32	86	17.68	100	171.46	76.95	86.95	22	218	17
K01730	ogl; oligogalacturonide lyase [EC:4.2.2.6]	2.5	5.79	6.14	1	1	0	13	11	2	4	1.36	8	3.5	3	4	2	1.14	1	0.25	0	5.25	12	15.43	17	18	35	0	0	1	0	0	0	2	13	14	14	16.75	16	8.36	0	0	18.75
K01731	pelW; pectate disaccharide-lyase [EC:4.2.2.9]	0	0	0	0	0	0	0	0	0	0	0	0	0	0	0	0	0	0	0	0	0	0	0	0	0	0	0	0	0	0	0	0	0	0	0	0	0	0	0	0	0	0
K01732	E4.2.2.10; pectin lyase [EC:4.2.2.10]	0	0	0.08	0	0	0	0	0	0	0	0	0	0	0	0	0	0	0	0	0	0	0	0	0	0	0	0	0	18	0	0	0.11	0	0.5	2	0	0	0.08	0	0	1.38	0
K01733	thrC; threonine synthase [EC:4.2.3.1]	32908.2	32094.6	34114.8	30144.4	23841.8	45814.6	42674	36646.2	30688.9	37135.2	29176.7	35768.7	28720.5	32864.5	37716.5	32068.5	33894	40289.4	40290.7	27994	41756.7	29930.4	29346.5	33229.5	39995.3	37688.4	2151.42	17529.3	19628.6	18635.3	27066.8	20558.4	28501.6	36888.5	35869	22544	43719.5	38594.8	24605.8	41465.2	18960.4	36102.7
K01734	mgsA; methylglyoxal synthase [EC:4.2.3.3]	4490.46	4519.19	4541.78	5085.06	2805.17	8843.38	6823.26	5749.55	4858.95	5375.9	4635.66	5060.31	4419.79	4547.54	5449.58	5072.57	5526.01	5749.3	5853.67	3698.51	6300.49	3817.13	4424.41	5275.09	5557.64	5731.16	350.44	2707.32	2996.62	3348.66	5260.91	2662.53	4227.83	6709.67	6314.24	4756.24	6311.76	5873.81	3893.7	4647.76	2766.25	3912.23
K01735	aroB; 3-dehydroquinate synthase [EC:4.2.3.4]	14660.9	16465.2	15249.8	19882.4	15905.1	23543	20673.4	17581.4	14803.7	16407	13566.4	15970.5	10339	14050.5	15518.1	13025.5	15718.2	15999	14917	10235.6	15370.3	13332.9	11581.2	19737.5	15118.8	15089.6	770.81	8638.99	10741.5	6789.46	13427.6	11166.7	13774.6	11483.7	15579.1	6663.42	16781.4	16876.2	10441.8	14097.1	8181.58	16265.9
K01736	aroC; chorismate synthase [EC:4.2.3.5]	18914.2	19965.6	19797.4	23411.4	18373.4	30042.5	28652	24551.2	20704.9	21901.4	17778.9	21197.5	15700.5	19433.3	21940.7	17921.1	20641.3	22309.9	22599	14866.1	22862.1	17409.9	16112.1	23608.9	20838.4	20221.5	1162.3	10816.8	13241.6	10184.3	17714.9	13954.7	17728.7	18239.5	21258.6	10794.6	24542.1	22617.9	14153	21215.9	11148.9	21742.8
K01737	queD, ptpS, PTS; 6-pyruvoyltetrahydropterin/6-carboxytetrahydropterin synthase [EC:4.2.3.12 4.1.2.50]	17134.7	18653.8	17606.3	20571.3	15857.6	27105.9	25221.8	21480.5	18133.9	20889	18183.5	19916.8	14272.7	17256.8	19677.3	17257.6	21427	21388.8	20481.3	14447.2	21710.7	15612.2	14341.7	21872.5	19675.4	18314.8	1038.67	10423.8	12361.2	9535.51	17106	13262.8	17096.2	18003.5	21036.6	9807.99	22383.7	22197.4	13809.8	20493.5	10779.7	21899.4
K01738	cysK; cysteine synthase A [EC:2.5.1.47]	20630.2	19892	21870.8	22794.2	17997.6	30751.4	28647.6	24703.5	20619.9	22748.2	18185.3	23038.4	18516.5	22066.1	25626.4	18945.2	20772.7	24849.3	26012.5	17490.8	27437.1	19433.3	18392.5	22531.4	25959.2	25004.5	1284.43	11035.3	12472	11332.6	19218.6	15077.5	19628.3	22138	17325.9	12970.8	25970.1	23600.1	14541	26114.5	12547.7	24257
K01739	metB; cystathionine gamma-synthase [EC:2.5.1.48]	4082.9	5096.64	3854.18	4008.14	3344.83	6670.66	5421.7	4524.47	3787.36	4631.37	4461.17	4240.35	2987.27	3762.26	4325.36	4093.08	5224.07	4426.96	4361.78	3420.49	5207.05	3466	3470.9	4913.05	3210.64	4038.08	184.82	2270.83	2287.16	1775.81	4865.69	2727.96	3445.5	3239.97	2691.85	2276.5	5623.96	6225.06	3348.84	4973.89	2263.21	4469.38
K01740	metY; O-acetylhomoserine (thiol)-lyase [EC:2.5.1.49]	19690.3	20167.4	20544.5	19145.1	16225.9	27987	25133.2	21736.9	18072.8	23835.4	18771.6	22384.3	15596	18778.4	21024.5	19819.4	22099.9	23966	21137.1	14064.3	22049.4	18906.9	18736.8	22392.9	22964.2	23541.4	1217.29	11035	12866.6	10480.2	14261.9	12445.1	16577.7	20684.7	22544.5	13330.9	26627.7	24355.2	15124.1	20774.4	10874.2	19507.8
K01741	E4.2.99.18; DNA-(apurinic or apyrimidinic site) lyase [EC:4.2.99.18]	1530.66	877.16	1420.47	419.5	430.51	895.17	684	575.49	514.17	877	840.49	939	806.5	505.82	581.83	754.49	1035.14	1222.17	1373.16	763.5	846.01	555.5	1240.15	817.83	580.01	492.66	26.99	292.66	353.33	362	717.66	735.83	728.33	1264.65	561.16	752.99	648.15	577.64	590.17	900.32	614.83	600.84
K01744	aspA; aspartate ammonia-lyase [EC:4.3.1.1]	1120.1	1191.91	1376.92	1955.42	1572.41	2538.42	1764.84	1589.25	1274.74	2053.65	1427.15	2405.44	1499.42	1451.8	2337.97	1621.37	1668.37	2878.68	2265.16	974.88	3078.99	1687.19	1617.23	1292.05	1531.7	1943.05	58.7	671.83	703.67	740.91	1349.33	677.28	786.16	2387.03	1441.3	1132	3662.62	2291.24	1084.18	1560.07	718.21	1284.74
K01745	hutH, HAL; histidine ammonia-lyase [EC:4.3.1.3]	4597.23	6386.47	4928.8	7227.89	5929.79	8799.04	6327.58	5454.16	4665.94	9516.72	8418.83	8537.91	5616.04	6430.9	7508.19	8885.14	10326	10235.7	8968.55	5908.11	8439.23	4532.66	4226.5	8107.89	5374.81	5977.57	358.17	3237.15	3389.62	3363.63	6119.83	5224.56	6678.34	5211.54	3782.4	3107.08	9405.25	8351.52	5069.99	6630.12	3888.75	6618.98
K01746	E4.3.1.4; formiminotetrahydrofolate cyclodeaminase [EC:4.3.1.4]	385.9	409.71	531.6	388.71	139.01	746.29	456.5	408.54	368.05	1198.84	578.66	1098.25	428.45	847.37	867.87	1249.49	729.47	1705.17	555.11	250.25	593.68	273.63	359.15	266.71	240.51	266.04	37.11	400.66	179.45	228.25	167.66	284.33	400.83	619.03	698.66	756.41	1103.15	889.13	391	353.87	234.38	252.62
K01749	hemC, HMBS; hydroxymethylbilane synthase [EC:2.5.1.61]	18378.5	19432.6	19000.9	21864.7	17629	28422.6	26478	22741.8	19019.1	20777.2	17115	20227.2	14504	18213	20558.8	17030.4	19912.1	21233.5	20898.2	14264.1	21410.5	16464.9	15612.6	22971.6	19872.6	19147.3	1065.3	10434.3	12538.1	9292.16	16620.2	13124	16883.3	17493.3	20621.6	10471.6	23217	21835.8	13789.7	20307.3	10721.9	21009.4
K01750	E4.3.1.12, ocd; ornithine cyclodeaminase [EC:4.3.1.12]	3917.97	4180.75	3646.18	6940.33	7295.87	9479.65	5808.1	5106.26	4102.7	3378.8	3876.04	3473.94	3948.94	4585.68	5257.74	3222.41	4285.93	3715.53	5281.5	2724.76	4588.97	1914.61	2271.97	5842.11	2633.92	3726.57	173.86	3093.32	2861.68	1821.8	2968.84	3379.84	2641.42	3001.05	3655.84	1618.67	3938.47	3795.52	2942.65	3210.16	1930.5	1926.6
K01751	E4.3.1.15; diaminopropionate ammonia-lyase [EC:4.3.1.15]	1269.06	1081.1	1151.6	1230.5	1708.91	1555.33	1902.26	1641.45	1289.12	649.17	883.37	697.2	601.5	814.57	992.63	706.6	1022.76	720.43	1007.92	417.5	1212.68	333.34	480.42	976.84	440.45	1047.71	31	710.5	780.67	346.08	330	654.17	393.33	289.36	543.3	211.5	1051.57	837.77	735.29	850.9	291	390
K01752	E4.3.1.17, sdaA, sdaB, tdcG; L-serine dehydratase [EC:4.3.1.17]	10931.3	9558.48	11836.5	13927.7	11138.5	15267	18361.2	15695.7	12806.1	10886.2	8757.48	10442.2	6379.82	7294.08	8635.81	8939.9	10324.4	10312.8	9374.37	5364.85	8800.66	7262.72	8651.12	11805.4	5114.08	6046.28	423.3	4928.32	5035.58	3615.56	6030.98	4527.65	5130.76	6890.59	4692.94	3683.34	11272.1	10506.1	6749.15	7375.12	4854.18	6423.32
K01753	dsdA; D-serine dehydratase [EC:4.3.1.18]	169.49	255.91	157.23	80	42.62	236.25	187.25	151.24	140	124.23	107.98	115.16	58.83	49.9	55.63	113.31	128.48	104.1	50.53	65	88.6	97.27	181.58	82.09	63.63	234.88	5.2	140.66	71.34	48.41	143.5	255.11	79.17	255.44	48.58	61.5	306.01	144.64	138.7	139.32	126.71	75.56
K01754	E4.3.1.19, ilvA, tdcB; threonine dehydratase [EC:4.3.1.19]	24690.5	25318.6	25005.9	25487.3	20580.4	35945.6	32382.4	27904.8	23214.7	26439.2	22493.9	26582.7	20680.6	23589.9	27066.1	22731.1	26171.1	29324.1	28594.8	18644.9	28787.1	20437.4	20003.8	26683.4	27204.3	29590.1	1532.04	14541.3	16792.3	13381.7	20029.4	16489.7	21318.1	25028	27202.8	16217.7	30085.5	27898.8	18020.3	25728.6	13356.7	25286.9
K01755	argH, ASL; argininosuccinate lyase [EC:4.3.2.1]	18726.5	19746.9	19544	21363	18103.2	28367.3	24981.2	21499.3	17951.5	21154.6	17136.5	20578	15268.6	18703.1	21105.4	17322.3	19887.7	21556.8	21903.8	14427.6	22280.6	17197.7	15975.9	23349.6	20633.7	20009	1144.8	10423.3	12962	9879.26	16475.9	12853.9	17279.7	17892.5	20834.1	10457.1	24002.2	22162.2	13960	20831.4	10815.9	21339.2
K01756	purB, ADSL; adenylosuccinate lyase [EC:4.3.2.2]	19250.2	20366.5	20400	24425.4	19575.4	31009.8	29270	25145.5	21137.9	22718	18048.4	21965.9	15912.3	19809.3	22321.3	18521.1	20906.3	22994.9	22685.7	14926.1	23143.1	18401.8	17044.7	24443.6	21160.1	20429.5	1177.7	10964.6	13482.3	10364.3	17990.9	14058.7	17959.3	18320.5	21338.6	10862.6	25679.9	23266.7	14356.4	21450.9	11254.9	21881.8
K01758	CTH; cystathionine gamma-lyase [EC:4.4.1.1]	1013.7	1598.88	1061.17	3332.65	2950.63	4405.83	2358.84	1941.32	1712.17	1884.15	2024.39	1732.53	1433.89	2113.66	2028.49	1762.28	2361.26	1917.33	2083.91	2155.83	2411.11	1757.02	1328.35	3982.5	1509.29	1331.88	70.55	927.83	727.66	725.88	1882.83	1813.67	1906.16	1587.48	761.73	554.83	2645.14	2743.53	1433.51	2044.99	1221.5	1352.92
K01759	GLO1, gloA; lactoylglutathione lyase [EC:4.4.1.5]	16341.7	15382.2	17139.9	16521.4	13313.4	25216.3	22415	19338.9	16154.7	18626.5	14618	18554.2	14336.2	17395.4	19847.5	15619.3	16936.9	20653.9	19057.6	12686.7	20094.4	14647.4	14725.9	17919.8	18139.6	19575.5	1162.75	9708.97	11686.4	9714.4	12120.9	11054.2	14937.5	19518.1	23725.6	13240.7	20383.5	18187.9	12506.7	17826.2	9558.92	16901.3
K01760	metC; cystathionine beta-lyase [EC:4.4.1.8]	2604.26	3832.86	2530.44	6823.05	4105.62	7385.19	6908.75	5734.73	5020.56	5464.95	5273.54	4685.16	2833.51	3026.63	4019.68	4505.55	6500.32	4955.72	4640.44	3047.59	4757.98	2889.63	2238.34	6572.19	2748.05	3504.92	170.12	2678.32	2092.3	1874.13	3027.33	2459.62	3007.35	2902.83	1819.73	1364.42	4051.72	4129.25	2803.28	4129.7	1965.09	4585.47
K01761	E4.4.1.11; methionine-gamma-lyase [EC:4.4.1.11]	1294.88	1929.37	1454.46	2230	981.29	3035.49	3829.84	3293.59	2833.45	3297.8	3233.79	2604.98	1856.67	1894.01	2360.57	3183.9	4153.94	3282.86	2651.81	1754.92	2774.88	1247.92	1292.57	2106.67	2587.83	3287.25	101.5	1073.5	921.17	1044.67	1571	1398.67	1498.5	2118.97	1197.44	899	2851.15	2643.75	1780.6	1771.5	1234	1762.61
K01762	ACS; 1-aminocyclopropane-1-carboxylate synthase [EC:4.4.1.14]	5	7.5	2	23.5	17.5	10	101	88.5	66	19	34.5	14	2	2	3.5	25.5	41	17.5	5.5	6	6.5	1.5	10	0	8.5	27	2.5	19	13	27.5	7.5	0	8.5	3.5	0	0	25	19	4.5	0.5	4.5	1.5
K01766	csdA; cysteine sulfinate desulfinase [EC:4.4.1.-]	5.43	10.11	8.84	3.67	5.79	31.84	96.33	77.67	76.45	7.98	5.57	10.82	18.2	2.73	19.8	5.05	14.21	5.27	44.41	13.83	22.52	5.6	4.73	9.88	21.79	35.38	0.2	6.83	17	3.91	0.33	0.67	4.67	1.17	1.47	2	10.26	12.8	7.86	19.57	4.83	58.41
K01768	E4.6.1.1; adenylate cyclase [EC:4.6.1.1]	9061.49	11582.6	9116.81	9839.64	14043.5	11066.2	8217.17	7176.65	6067.32	10660	8650.46	11297.1	6235.65	9427.34	10573.2	8238.45	9768.05	11241.5	10304.3	6714	10976.4	10937.5	8924.17	18207.3	15145.9	17573.7	537.16	4914.84	6975.16	4635.86	9200.16	9841.34	10817.7	5252.48	11896.5	4288.51	13525.3	11621.6	8321.47	10506.5	6149.16	9819.66
K01769	E4.6.1.2; guanylate cyclase, other [EC:4.6.1.2]	1	0.5	2	0	0	0	1.5	1.5	1.5	2	0	0	0	0	0	0	0	0	0	0	0	1	0	0	0	1	0	0	0	0	0	0	0	0	1	0	0.5	0.5	0	0	0	0
K01770	ispF; 2-C-methyl-D-erythritol 2,4-cyclodiphosphate synthase [EC:4.6.1.12]	11026.2	11723.2	11669.7	13218.7	9609.74	17032.1	16306.8	13880.7	11769	11363.2	8683.55	11305.2	7584.54	10336.6	11234.1	8419.15	9915.19	10904.8	10805.7	7551.64	10714.3	11023.6	9224.32	13620	11459.3	10190.8	500.48	5652.49	8229.96	4431.69	7120.91	7400.53	9154.75	8686.43	12360.4	5152.92	11794	12264.6	7338.01	10968.3	6095.08	13755.3
K01771	plc; 1-phosphatidylinositol phosphodiesterase [EC:4.6.1.13]	3.33	9.33	10	2	16	2	73	46	36	5.67	0	10.33	1	0	1	0	1.33	10	0	0	0	10.67	6.33	3	19	27	9	11	48	22	19	23	47	1	0.33	0	1.17	1.67	3	0	7	0
K01772	hemH, FECH; protoporphyrin/coproporphyrin ferrochelatase [EC:4.99.1.1 4.99.1.9]	8586.26	11188.8	8496.01	11466.2	11256.5	16155.8	13165.2	11151.2	9472.43	11971.1	10360.9	11472.5	6861.86	8876.88	10164.7	9830.07	12183.3	12035.8	10758.6	7672.09	11034	9283.18	7188.98	15221	9820.47	11552.9	551.86	6240.66	7882.17	4695.81	10106.6	8653.2	10818.2	7395.69	13410.2	4544.84	12784.9	11810.4	7734.21	9423.9	5495.37	8645.41
K01775	alr; alanine racemase [EC:5.1.1.1]	14914.3	16656.3	15708.5	20540	16507.6	24731.6	22325.6	19010.1	16060.4	16651.2	13663.8	16306	11121.6	14348.8	16237.9	13002	15797.5	16257.5	16357	10040.5	16010.7	13464.9	11731.8	20159.9	14922.4	14465	784.85	8812.66	10961	6971.67	13851.6	11167.5	13861.9	12096.6	15611.2	6564.09	18190.9	17456	10675.6	13808.3	8023.96	16358.8
K01776	murI; glutamate racemase [EC:5.1.1.3]	13713	15103.1	14450.9	18840.7	15327.7	20885.8	19459	16653	13908.1	14915.7	11731.3	14737.6	9858.28	12546.7	14359.9	11554.5	13523	14574.7	14747.2	8722.31	13985.4	11305.1	10245.5	17650	13111.8	11987.3	656.65	6693.33	7653.62	5850.26	12524.6	9974.81	12222.2	10500.5	7444.65	5710.59	14633.9	13819.6	8884.69	11973.6	6805.75	14683.7
K01777	prdF; proline racemase [EC:5.1.1.4]	42.23	35.04	45.35	126.71	33.01	70.29	89.5	103.54	78.05	100.92	157.74	131.08	276.45	372.37	467.2	138.57	232.97	193.67	70.36	29.25	150.68	16.3	49.73	33.71	51.51	89.04	6.11	147.66	55.45	155.25	87.66	182.33	130.33	445.03	424.66	195.41	166.23	98.63	87.67	56.54	44.38	52.62
K01778	dapF; diaminopimelate epimerase [EC:5.1.1.7]	17686.2	18665.2	18315.7	20903.5	17419.5	27498.5	24074.5	20716.8	17456.6	19506.2	16203.2	19283.2	13732.5	17225	19695.6	15779.3	18727.8	20054.6	19511.3	12935.6	20394.8	15510.2	14500.6	21956.3	18762.6	18245.7	1017.31	10089.2	12271.3	9077.66	13987.6	12827.7	15585.3	16125.9	19392	10037.1	21460.6	20249.2	12953.5	18332.3	10204.1	19847
K01779	racD; aspartate racemase [EC:5.1.1.13]	1360.29	1293.82	1460.51	1988.39	561.62	3924.62	2720.01	2297.27	1921.91	1780.31	2280.89	1592.31	1445.25	976.05	1323.19	1770.29	2877.37	1947.33	2113.31	900.85	1906.78	907.31	1088.9	867.72	1343.5	1640.2	47.95	777.16	572.29	728.92	753.92	633.86	966.08	908.43	1178.94	571.25	1650.08	2116.16	1328.2	1322.79	633.92	744.34
K01781	mdlA; mandelate racemase [EC:5.1.2.2]	3	0	8	0	3	0	0	1	0	2	2	1	0	0	0	1	2	5	0	11	0	33	3	16	552	806	3	17	5	3	0	0	0	0	11	1	5	4	1	1	0	0
K01782	fadJ; 3-hydroxyacyl-CoA dehydrogenase / enoyl-CoA hydratase / 3-hydroxybutyryl-CoA epimerase [EC:1.1.1.35 4.2.1.17 5.1.2.3]	2926.42	3625.34	2693.16	6147.07	5025.45	8463.5	5151	4447.49	3735.2	3212.82	3529.63	3109.28	2428.02	3298.4	3833.13	3014.26	3962.79	3282.71	2989.25	2405.33	3717.02	2229.51	1796.23	5792.72	3476.78	4871.55	165.53	2547.67	1921.5	1447.71	2946	2938.01	2570.33	2670	1938.7	1394.67	3800.94	3725.21	2416.36	2391.23	1798.16	2478.42
K01783	rpe, RPE; ribulose-phosphate 3-epimerase [EC:5.1.3.1]	14990.5	16650.8	15799.3	19968.4	15991.9	23532	21588.9	18433.3	15503.9	16707	13535.9	16314.7	11295.8	14676.8	16512.8	13067	15595.8	16161.6	16607.3	10248.3	16567.4	13936.6	11822.8	19914.8	15993.1	15772.6	784.48	8369.16	10693.8	6852.76	14054.6	11357.9	13899.1	12062.1	15775.7	6638.09	18358.7	17026.5	10486.4	14130.1	8152.58	16591.2
K01784	galE, GALE; UDP-glucose 4-epimerase [EC:5.1.3.2]	41299	40041.6	43025.8	47654.9	35891.7	59818.2	57971	50026.5	41916.3	46886.8	36854.3	45657.4	35659.6	44378.8	49875	39223.4	42301.2	48958.8	50224.7	33260.8	52140	38608	36387.1	47837.9	52671.6	52726.8	2631.4	22531.8	26185.8	23527.7	38487.9	29053.8	37097.1	42311.3	43673.7	28668.4	54553.9	48862.6	30198.3	49558.5	24371.6	47552.7
K01785	galM, GALM; aldose 1-epimerase [EC:5.1.3.3]	3557.37	4196.8	3388.07	5022.84	4395.08	9934.83	7080.58	5858.47	5105.01	5805.96	6202.03	5377.95	3437.33	4118.52	4520.67	5649.16	7816.76	6589.93	5002.9	3103.59	4688.8	3210.15	2581.2	4387.25	5316.04	7171.22	210.99	3833.49	2839.34	2241.75	3066.75	2453.71	3180.42	3460.29	2392.34	2324	4958.68	5449.68	3462.18	3432.14	2348.71	3258.5
K01787	RENBP; N-acylglucosamine 2-epimerase [EC:5.1.3.8]	570.67	896	508.17	1044	726.33	1735.5	1220	976.5	908.5	1184.67	1105.67	947	542	665.5	867.5	1200.83	1311.83	1255.5	711.5	825	1155.17	475.5	478	1258.5	754.33	943.67	44	533.5	350	437.5	740	511.33	529.66	931.33	399	504.5	920.83	1292.33	765	817	265.5	946.83
K01788	nanE; N-acylglucosamine-6-phosphate 2-epimerase [EC:5.1.3.9]	303.93	260.57	354.15	621.5	193.46	593.42	641.33	507.5	416.41	250.73	236.01	820.04	338.51	234.73	417.38	244.63	272.73	1287.6	485.33	364.83	579.44	210	238.26	129.83	317.96	484.38	15.5	201.83	219	140.41	223.33	100.84	182.67	595.17	287.47	270.5	410.97	498.93	173.77	397.24	281.33	380.75
K01790	rfbC, rmlC; dTDP-4-dehydrorhamnose 3,5-epimerase [EC:5.1.3.13]	13566.1	15065.7	14044.6	14993.3	12871.3	18348.5	16022.5	13840.3	11402.6	14428.2	11720.5	14310.3	9352.33	11846.4	13679.1	11165.2	13573.2	14043.9	13956.9	9271.44	14757.8	11715.8	10443.1	16316.1	15772.6	16065.9	686.19	7441.49	7998.67	6023.21	12278	9615.36	12542.9	9539.77	14284.5	5499.67	16811.6	15239.1	9491.59	14047.3	7191.2	15701.5
K01791	wecB; UDP-N-acetylglucosamine 2-epimerase (non-hydrolysing) [EC:5.1.3.14]	13233.7	14805.2	14068.3	17525	12138	18991.2	19730.6	16864.1	14105.1	15402.7	12525.1	14727.5	10722.6	13070.2	14605.2	12297.7	14568.2	14591.4	15851.2	10522.1	15440.4	12028.5	10990.6	17927.4	15283.7	13955	781.77	6376.66	7477.12	6924.38	12691.8	8369.95	10535.1	11378.6	9694.47	7235.08	17960.2	15738.1	9867.5	13977.7	8259.25	15742.1
K01792	E5.1.3.15; glucose-6-phosphate 1-epimerase [EC:5.1.3.15]	706.43	1042.98	702.74	804.67	344.62	1540.76	758.99	644.42	540.45	708.15	614.12	1204.62	896.39	478.9	803.04	569.67	653.13	1576.38	1734.44	856.26	1371.98	624.55	507.42	1969.55	1574.05	2191.62	16.93	297.66	263.67	287.91	464.41	214.42	275.75	835.92	352.14	351.67	522.42	592.2	492.6	1127.48	599.49	959.62
K01795	algG; mannuronan 5-epimerase [EC:5.1.3.37]	2	2.6	1.2	188	0	953	68	57	50	1	0.4	0.2	0.2	0	5	0	6	0	2	0	0	3.6	2.8	0	0	5	0.2	0	9	0	0	0	0	1	0	0	1.4	2.2	3.2	0	0	1
K01796	E5.1.99.4, AMACR, mcr; alpha-methylacyl-CoA racemase [EC:5.1.99.4]	1061.5	1223.5	843.5	653	323.5	1638	755.5	664.5	599	620.5	567.5	758	605.5	1184.5	1249.33	412.5	580.5	686	616	593.5	734	863	611.5	888.5	1421	2072	58.5	346.5	396	349	1021	1280	1195.5	1039.5	334	1048	425.84	700	389	837.67	387.5	977
K01799	nicE, maiA; maleate isomerase [EC:5.2.1.1]	1990.85	1798.98	1753.7	2000.67	2049.5	2537.81	2492.17	2209.92	1742.42	1642.58	1799.42	1666.02	1501.65	1639.34	1903.76	1662.5	2037.3	1849.83	2393.61	1281.09	2147.42	861.75	1106.11	1665.86	1063.44	1656.41	56.16	1071.64	1135.69	638.5	762.59	968.75	886.77	1118.25	1444.25	650.5	2444.34	2003.83	1303.17	2182.08	957.5	1047.83
K01800	maiA, GSTZ1; maleylacetoacetate isomerase [EC:5.2.1.2]	797.92	1073.15	750.07	3240.5	2387.5	2743.91	2063.08	1799.75	1437.12	954.25	1113.05	869.94	582.35	853.17	967.17	919	1205.25	873.83	748.54	527.25	875.46	519.7	632.6	3336.47	544.67	946	45.4	390.33	455.34	393.8	1082	1236.17	653.17	466.5	773.75	345	951.55	948.15	836.74	280.25	260.5	351.88
K01801	nagL; maleylpyruvate isomerase [EC:5.2.1.4]	879.04	1149.36	790.83	2622.66	2388.45	1965.24	1356.92	1183.66	1065.33	1117.81	1195.66	1119.79	1161.77	1572.34	1804.76	1030.25	1268.13	1181.7	1739.63	841	1286.88	704.08	728.92	3052.76	1156.71	1536.13	45.5	554.33	451.84	497.38	1563.25	1661.59	1356.59	1041.75	457.74	359.17	1349.49	1202.66	804.24	763.83	391.5	725.38
K01802	E5.2.1.8; peptidylprolyl isomerase [EC:5.2.1.8]	10374.7	11770.4	10127.2	8793.42	9374.28	14432.6	11327.8	9829.46	7973.87	13027.5	13183.8	12162.6	7585.71	10581.9	11615	11214.6	16221.5	12562.7	11377.2	6410.85	11237.5	8354.43	7756.73	10430.1	9749.64	13036.5	509.06	6586.67	5613.34	4439.28	9385.16	7147.51	8681.32	7285.2	6271.13	5067.84	14180.9	13492	8060.23	9915.42	5242.49	8898.43
K01803	TPI, tpiA; triosephosphate isomerase (TIM) [EC:5.3.1.1]	19105	20093.8	19936.9	23469.5	18455	30773.1	28137.2	24138.8	20288.3	22073.4	17826.9	21321	15772.2	19401	21941.2	18054.4	20663.8	22419	22842	15039.2	23103.6	17570.7	16251.6	23708.4	20964.9	20394.1	1178.96	10888.1	13344.6	10342.1	17952.3	14049.7	17839.8	18485	21319.8	10902.6	24677.4	22689.6	14260.2	21659.6	11318.2	22054.6
K01804	araA; L-arabinose isomerase [EC:5.3.1.4]	350.76	494.33	363.22	736.34	612.12	1555	921.5	718.33	663.78	837.72	854.33	724.04	321	343.34	426.8	907.8	1120.21	1080.85	507.83	589.84	549.43	374.83	345.26	640.21	595.12	713.21	23.5	712	342	435.41	309	133.61	386.17	607.67	210.63	232	673.53	1276.01	555.33	789.9	412.38	619.75
K01805	xylA; xylose isomerase [EC:5.3.1.5]	2972.23	3406.33	3085.52	4514.5	3993.29	6934.16	5010.32	4319.66	3571.66	4239.4	3890.9	3981.24	2547.5	3483.23	3673.3	3842.07	4630.44	4356.96	3189.23	2484.5	3432.87	3164.33	2612.19	4243.5	3417.12	4759.22	171.83	2282.83	1967.5	1687.58	2620.83	1978.95	2267.84	2968.84	1396.3	2248.5	4474.41	4224.68	2479.82	2668.9	1987.21	2996.58
K01807	rpiA; ribose 5-phosphate isomerase A [EC:5.3.1.6]	8720.34	9440.75	8727.64	14050.6	11425.6	18935.8	16928.6	14455.4	12338.5	11788.1	9554.59	11811.5	9408.81	11702.1	12862.7	10034.1	11086.9	13408.5	12487.8	8688.67	12819.3	9531.92	8590.14	14404.5	11730	12726.7	688.68	6389.32	8784.5	5902.31	8512.44	8544.59	10233.7	11896.6	16073.4	7275.83	13990.8	12354.8	7968.16	12502.5	6178.32	13089.3
K01808	rpiB; ribose 5-phosphate isomerase B [EC:5.3.1.6]	11652.2	11958.3	12437.7	12404	9150.41	13389.2	13195.9	11480.4	9404.57	11351.3	9309.44	10707.9	7978.56	10084.5	11602.6	9094.42	10798.4	10452.1	11732	6734.06	11928.2	9026.46	8216.93	10194	10334.2	8831	552.78	5521.66	5781.62	4914.36	10296	6683.45	8431.5	9155.35	6022.07	4750.75	12080.3	11365	7075.18	10212.6	5395.92	13430.3
K01809	manA, MPI; mannose-6-phosphate isomerase [EC:5.3.1.8]	2820.49	3173.28	3287.78	3855.33	3283.31	4696.25	4684.24	3986.48	3335.89	5926.22	5406.65	5831.3	2726.58	4636.24	5061.96	5227.61	6822.57	6778.76	4295.33	2873.83	4735.41	3873.41	3126.1	3588.38	4552.65	5291.21	184.83	1828.66	1690.67	1725.78	2882.73	2212.5	2907.49	2795.36	2262.63	2073	5201.71	4783.5	2808.52	3815.07	2069.97	3244.13
K01810	GPI, pgi; glucose-6-phosphate isomerase [EC:5.3.1.9]	18181.5	19417.1	18803.4	22130	17886.2	29183.1	26569.9	22822.2	19128.6	20602.7	16919.8	20119	14729	18223.7	20651.2	16827.2	19632.5	21218.2	21358.3	14032.4	21509.4	16093.7	15462.5	22792.4	18862.4	17951.9	1075.13	10227.8	12873.6	9279.46	16549.6	13286.4	16550.5	17329.5	20568.6	10518.6	22640.1	21176.8	13626	19309.3	10823.9	20201.1
K01811	xylS, yicI; alpha-D-xyloside xylohydrolase [EC:3.2.1.177]	336.09	142.37	344.71	126.16	78.45	164.67	128.84	111.16	107.83	752.17	566.03	486.42	189.49	176.07	327.97	792.1	795.56	736.1	373.67	146	220.77	286.33	177.76	229	590.62	688.71	5	244.17	117.33	207.57	156.5	66.67	164.67	462	95.46	111.17	308.22	508.84	335.11	485.4	83	193.75
K01812	uxaC; glucuronate isomerase [EC:5.3.1.12]	1112.67	1306.17	1087.77	1894.55	1073.79	2911.79	2662.83	2236.21	1933.12	1837.29	2100.37	1757.79	1253.29	1752.11	1880.18	1903.29	2667.26	2195.47	1634.2	1035.75	1727.86	975.29	628.18	897.88	1386.12	1620.43	50.45	1068.83	623.12	764.66	814.83	424.95	737.17	1450.05	1047.8	742.25	1596.79	1931	1123.12	1420.95	1150.59	1265.87
K01813	rhaA; L-rhamnose isomerase [EC:5.3.1.14]	207.59	190.21	242.22	100.33	58.12	121.33	119.33	93.33	68.67	516.64	504.24	372.54	236.17	282.4	327.8	568.55	661.71	476.76	370.5	468.5	546.44	355.67	245.43	301	617.62	656.05	8	192.5	72	112.91	211	82.61	207.67	293.5	136.3	179	386.39	434.85	200.83	724.73	672.38	588.75
K01814	hisA; phosphoribosylformimino-5-aminoimidazole carboxamide ribotide isomerase [EC:5.3.1.16]	19539.5	20526.3	20457	21609.2	19918.4	29062	25193.1	21646.1	18090.6	21681.7	17865.8	21270.5	15631.7	19076.7	21714.9	17864.4	20801	22411.1	22800.2	14741.4	23020.9	17896	16726.2	23449.8	20995.6	20237.2	1137.63	10558.3	13014.6	9784.39	17346.4	13792.2	17676.5	17836.1	21100.1	9867.08	24625.4	23137.2	14915.2	21411.9	11115.4	21473
K01815	kduI; 4-deoxy-L-threo-5-hexosulose-uronate ketol-isomerase [EC:5.3.1.17]	642.88	577.67	664.08	547.38	245.41	853.62	609.43	565.95	465.92	1013.81	1101.96	983.37	705.62	947.78	1147.35	977.84	1381.79	1170.97	849.12	379.75	857.1	433.13	244.75	298.38	627.79	788.59	32.12	331	256.12	395.16	499.5	457.11	388	1175.74	911.97	729.75	607.35	555.67	523.96	419.28	331.26	255.37
K01816	hyi, gip; hydroxypyruvate isomerase [EC:5.3.1.22]	3830.95	4407.87	3559.22	3502.68	2945.61	7029.91	4024.74	3436.24	2847.16	3266	3601.29	3150.81	2672.81	3250.98	3460.74	3238.69	4316.25	3611.11	3702.32	2871.36	3863.28	2548.69	2864.21	3164.09	3990.46	5324.03	135.72	2234.15	1971.84	1394.08	2387.51	2256.17	2283.51	2116.84	2382.09	2097.5	4100.75	4765.5	2601.3	3995.37	2160.83	3806.49
[truncated: 6,477 more rows]
